# Supplementary material for: Synthesis of chiral hexynones for use as precursors to native photosynthetic hydroporphyrins
Source: Royal Society of Chemistry journal article supplement (doi:10.1039/d3nj03900e), 2024-01-01

Supplementary Information for:

**Synthesis of Chiral Hexynones for Use as Precursors to Native Photosynthetic  
Hydroporphyrins**

Khiem Chau Nguyen,<sup>a</sup> Duy T. M. Chung,<sup>a</sup> Phattananawee Nalaoh,<sup>b</sup> and Jonathan S. Lindsey<sup>a,\*</sup>

<sup>a</sup> Department of Chemistry, North Carolina State University, Raleigh, NC 27695-8204, USA

<sup>b</sup> Department of Chemistry, University of Tennessee, Knoxville, TN 37996, USA

**Table of Contents**

| <b>Topic</b>                                                        | <b>Pages</b> |
|---------------------------------------------------------------------|--------------|
| <b>(1) Detection of an epimer by <sup>1</sup>H NMR spectroscopy</b> | S2           |
| <b>(2) Single-crystal X-ray diffraction data</b>                    | S3–S6        |
| <b>(3) Spectral data</b>                                            | S7–S101      |

### (1) Detection of an epimer by $^1\text{H}$ NMR spectroscopy

The integrity of the stereogenic centers in **4** is contrasted with those in the mixture of **4** and **4-epi** upon examination by  $^1\text{H}$  NMR spectroscopy. The spectra are displayed in Figure S1. In the most upfield region, two singlets (partially merged with each other) corresponding to the trimethylsilyl group of **4** and **4-epi** appear at 0.14 and 0.13 ppm, respectively. Each type of methyl group in **4** and **4-epi** appears at the same position, giving rise to two resonances, one triplet and one doublet, centered at 1.03 and 1.17 ppm, respectively. The methylene protons of the ethyl group from two epimers resonate at the range corresponding to the multiplet centered at 1.50 ppm. The multiplet centered at 2.40 ppm can be assigned to one methyne proton in **4** and the analogous one in **4-epi**. The other methyne protons in **4** and **4-epi** appear in the downfield region and are well resolved as two distinctive resonances at 2.55 and 2.76 ppm, respectively. The same scenario was also noted for the aldehydic resonances of the two epimers: the higher one (9.67 ppm) can be easily assigned to the major component, **4-epi**, while the smaller one at 9.76 ppm is assigned to the minor component, **4**.

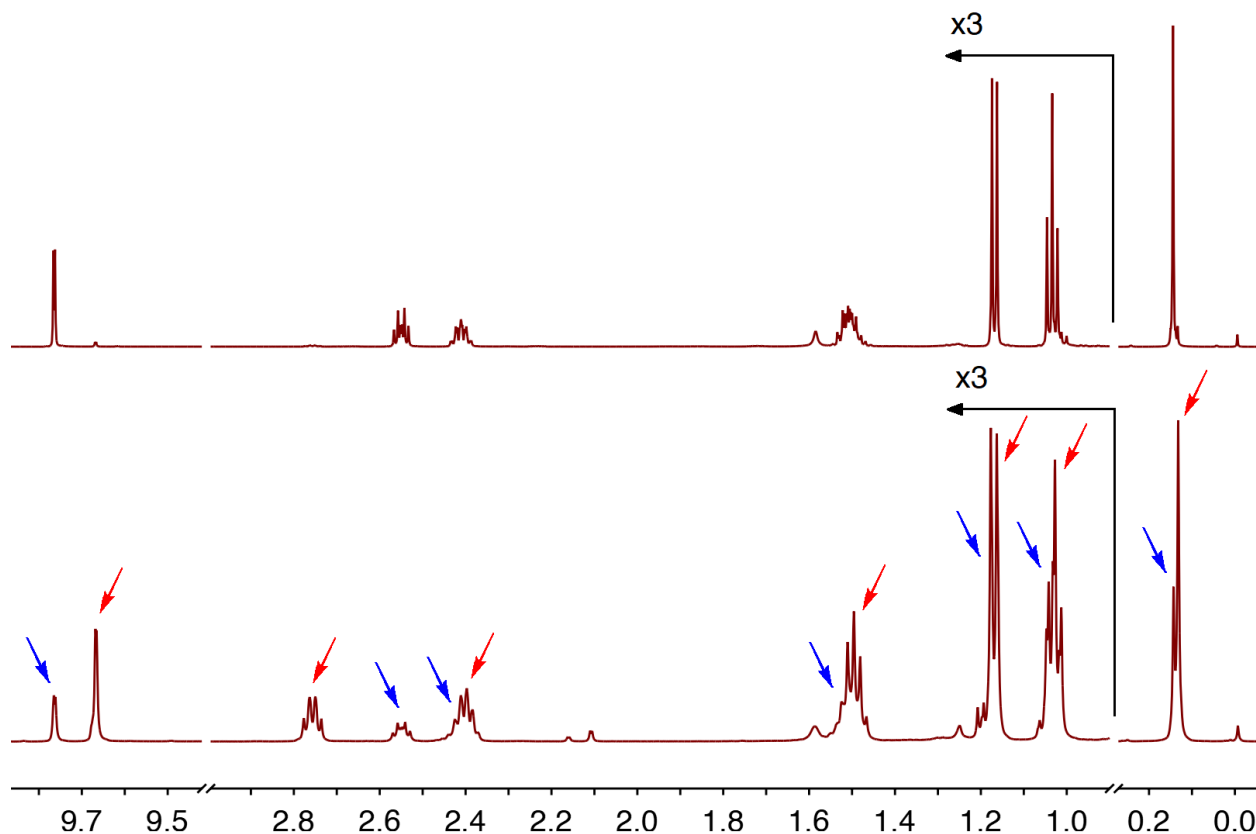

**Figure S1.**  $^1\text{H}$  NMR spectra in  $\text{CDCl}_3$  of **4** (top, 600 MHz instrument) obtained by exhaustive reduction followed by oxidation<sup>10</sup> and an inseparable mixture of **4** and **4-epi** (bottom, 500 MHz instrument) obtained by hydrolysis of **7**. Resonances corresponding to **4** and **4-epi** in the mixture are marked by blue and red arrows, respectively.

## (2) Single-crystal X-ray diffraction data

**Table S1.** Data for compound **10**.

|                                                 |                                                             |
|-------------------------------------------------|-------------------------------------------------------------|
| CCDC registry                                   | 2287122                                                     |
| Chemical formula                                | C <sub>17</sub> H <sub>31</sub> NO <sub>3</sub> Si          |
| Formula weight (g/mol)                          | 325.52                                                      |
| Temperature (K)                                 | 100                                                         |
| Wavelength (Å)                                  | 0.71073                                                     |
| Crystal size (mm)                               | 0.63 × 0.22 × 0.09                                          |
| Crystal habit                                   | Colorless plate                                             |
| Crystal system                                  | Monoclinic                                                  |
| Space group                                     | P <sub>21</sub>                                             |
| Unit cell dimensions, <i>a</i> (Å)              | 6.1517 (11)                                                 |
| Unit cell dimensions, <i>b</i> (Å)              | 11.1177 (19)                                                |
| Unit cell dimensions, <i>c</i> (Å)              | 14.455 (2)                                                  |
| α, deg                                          | 90                                                          |
| β, deg                                          | 91.786 (6)                                                  |
| γ, deg                                          | 90                                                          |
| Volume (Å <sup>3</sup> )                        | 988.1 (3)                                                   |
| <i>Z</i>                                        | 2                                                           |
| Density (calculated) (g/cm <sup>3</sup> )       | 1.094                                                       |
| Absorption coefficient (mm <sup>-1</sup> )      | 0.13                                                        |
| F(000)                                          | 356                                                         |
| Theta range for data collection, deg            | 2.3 to 26.7                                                 |
| Index ranges                                    | -6 ≤ <i>h</i> ≤ 7, -14 ≤ <i>k</i> ≤ 14, -18 ≤ <i>l</i> ≤ 18 |
| Reflections collected                           | 11928                                                       |
| Independent reflections                         | 4010 [R(int) = 0.042]                                       |
| R <sub>1</sub>                                  | 0.0433                                                      |
| wR <sub>2</sub>                                 | 0.0859                                                      |
| R <sub>1</sub> (all data)                       | 0.0514                                                      |
| wR <sub>2</sub> (all data)                      | 0.0900                                                      |
| Largest diff. peak and hole (eÅ <sup>-3</sup> ) | 0.21, -0.28                                                 |
| R.M.S. deviation from mean (eÅ <sup>-3</sup> )  | 0.041                                                       |
| Absolute structure parameter                    | -0.02 (9)                                                   |

**Table S2.** Data for compound **11**.

|                                                 |                                                                                   |
|-------------------------------------------------|-----------------------------------------------------------------------------------|
| CCDC registry                                   | 2287123                                                                           |
| Chemical formula                                | C <sub>25</sub> H <sub>36</sub> Co <sub>2</sub> N <sub>2</sub> O <sub>10</sub> Si |
| Formula weight (g/mol)                          | 670.51                                                                            |
| Temperature (K)                                 | 100                                                                               |
| Wavelength (Å)                                  | 0.71073                                                                           |
| Crystal size (mm)                               | 0.253 × 0.065 × 0.024                                                             |
| Crystal habit                                   | Clear dark red prism                                                              |
| Crystal system                                  | Orthorhombic                                                                      |
| Space group                                     | P2 <sub>1</sub> 2 <sub>1</sub> 2 <sub>1</sub>                                     |
| Unit cell dimensions, <i>a</i> (Å)              | 9.0216 (3)                                                                        |
| Unit cell dimensions, <i>b</i> (Å)              | 13.8726 (5)                                                                       |
| Unit cell dimensions, <i>c</i> (Å)              | 24.6824 (9)                                                                       |
| α, deg                                          | 90                                                                                |
| β, deg                                          | 90                                                                                |
| γ, deg                                          | 90                                                                                |
| Volume (Å <sup>3</sup> )                        | 3089.08 (19)                                                                      |
| Z                                               | 4                                                                                 |
| Density (calculated) (g/cm <sup>3</sup> )       | 1.442                                                                             |
| Absorption coefficient (mm <sup>-1</sup> )      | 1.166                                                                             |
| F(000)                                          | 1392                                                                              |
| Theta range for data collection, deg            | 4.808 to 54.272                                                                   |
| Index ranges                                    | -11 ≤ <i>h</i> ≤ 11, -17 ≤ <i>k</i> ≤ 17, -31 ≤ <i>l</i> ≤ 31                     |
| Reflections collected                           | 37149                                                                             |
| Independent reflections                         | 6743 [R(int) = 0.0656]                                                            |
| R <sub>1</sub>                                  | 0.0303                                                                            |
| wR <sub>2</sub>                                 | 0.0639                                                                            |
| R <sub>1</sub> (all data)                       | 0.0367                                                                            |
| wR <sub>2</sub> (all data)                      | 0.0667                                                                            |
| Largest diff. peak and hole (eÅ <sup>-3</sup> ) | 0.41, -0.29                                                                       |
| R.M.S. deviation from mean (eÅ <sup>-3</sup> )  | 0.058                                                                             |
| Absolute structure parameter                    | 0.007(8)                                                                          |



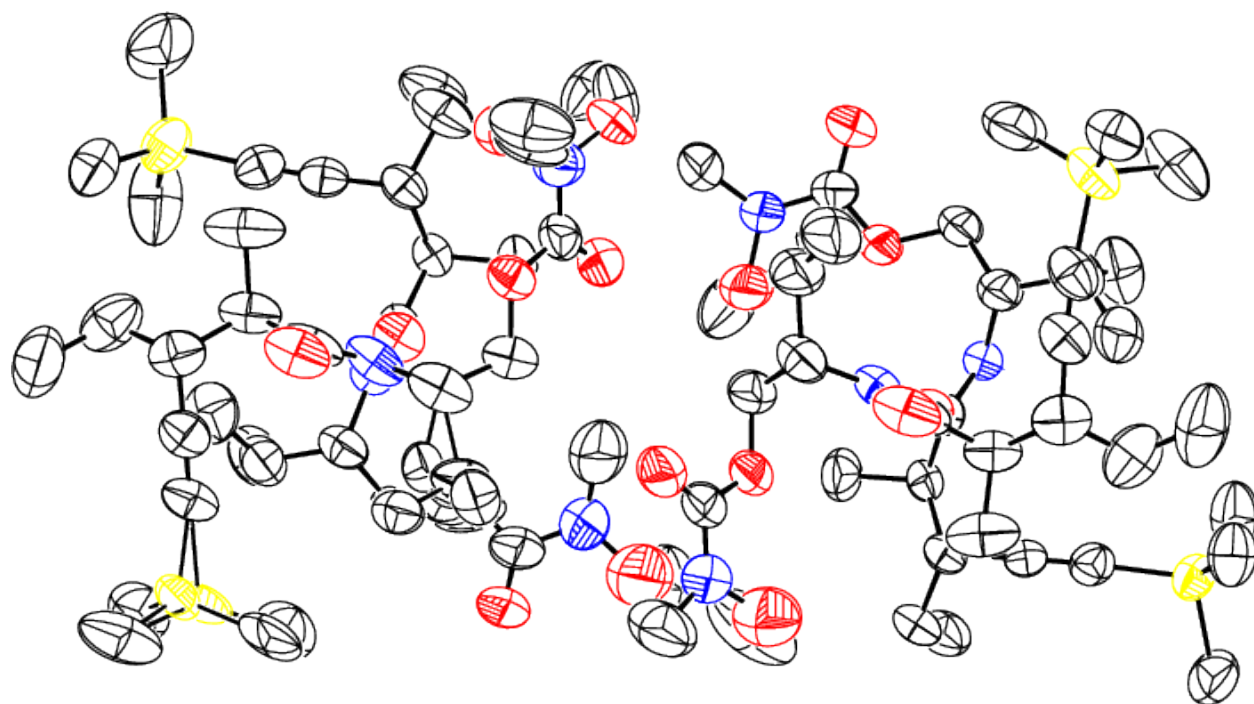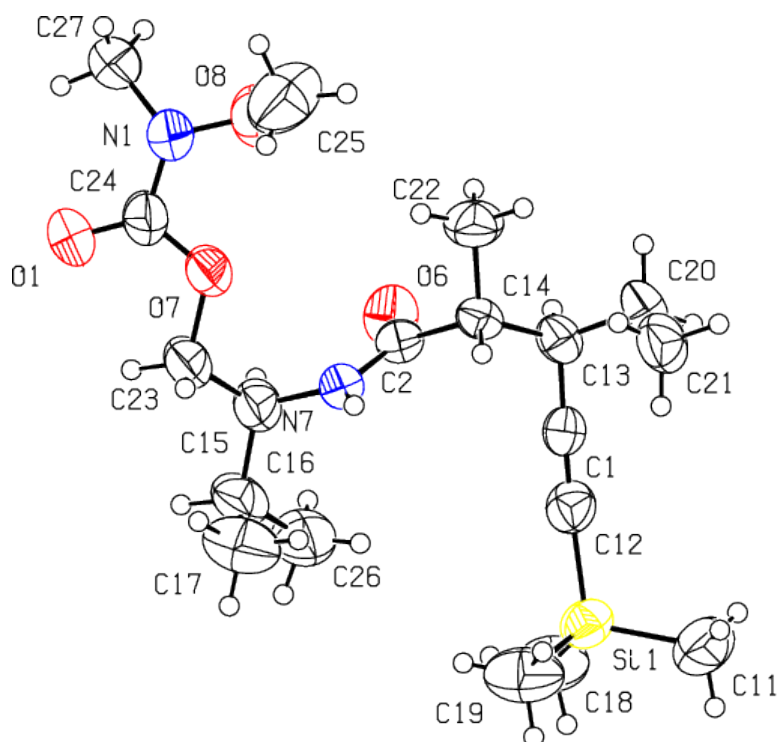

**Figure S2.** Top: ORTEP diagram of compound **12** containing four crystallographically independent moieties with thermal ellipsoids drawn at the 50% probability level and omitted H atoms for clarity; bottom: ORTEP diagram of the best moiety of compound **12** with thermal ellipsoids drawn at the 50% probability level.

**Table S3.** Data for compound **12**.

|                                                 |                                                                  |
|-------------------------------------------------|------------------------------------------------------------------|
| CCDC registry                                   | 2287124                                                          |
| Chemical formula                                | C <sub>19</sub> H <sub>36</sub> N <sub>2</sub> O <sub>4</sub> Si |
| Formula weight (g/mol)                          | 384.59                                                           |
| Temperature (K)                                 | 100                                                              |
| Wavelength (Å)                                  | 1.54178                                                          |
| Crystal size (mm)                               | 0.327 × 0.137 × 0.044                                            |
| Crystal habit                                   | Clear light colorless plate                                      |
| Crystal system                                  | Monoclinic                                                       |
| Space group                                     | P2 <sub>1</sub>                                                  |
| Unit cell dimensions, <i>a</i> (Å)              | 9.5029 (4)                                                       |
| Unit cell dimensions, <i>b</i> (Å)              | 44.825 (2)                                                       |
| Unit cell dimensions, <i>c</i> (Å)              | 11.1259 (6)                                                      |
| α, deg                                          | 90                                                               |
| β, deg                                          | 90.692 (3)                                                       |
| γ, deg                                          | 90                                                               |
| Volume (Å <sup>3</sup> )                        | 4739.0 (4)                                                       |
| Z                                               | 8                                                                |
| Density (calculated) (g/cm <sup>3</sup> )       | 1.078                                                            |
| Absorption coefficient (mm <sup>-1</sup> )      | 1.06                                                             |
| F(000)                                          | 1680                                                             |
| Theta range for data collection, deg            | 3.945 to 66.592                                                  |
| Index ranges                                    | -10 ≤ <i>h</i> ≤ 11, -53 ≤ <i>k</i> ≤ 53, -13 ≤ <i>l</i> ≤ 13    |
| Reflections collected                           | 60586                                                            |
| Independent reflections                         | 16704 [R(int) = 0.056]                                           |
| R <sub>1</sub>                                  | 0.0799                                                           |
| wR <sub>2</sub>                                 | 0.2241                                                           |
| R <sub>1</sub> (all data)                       | 0.0918                                                           |
| wR <sub>2</sub> (all data)                      | 0.2413                                                           |
| Largest diff. peak and hole (eÅ <sup>-3</sup> ) | 0.861, -0.341                                                    |
| R.M.S. deviation from mean (eÅ <sup>-3</sup> )  | 0.055                                                            |
| Absolute structure parameter                    | 0.022 (15)                                                       |

### (3) Spectral data

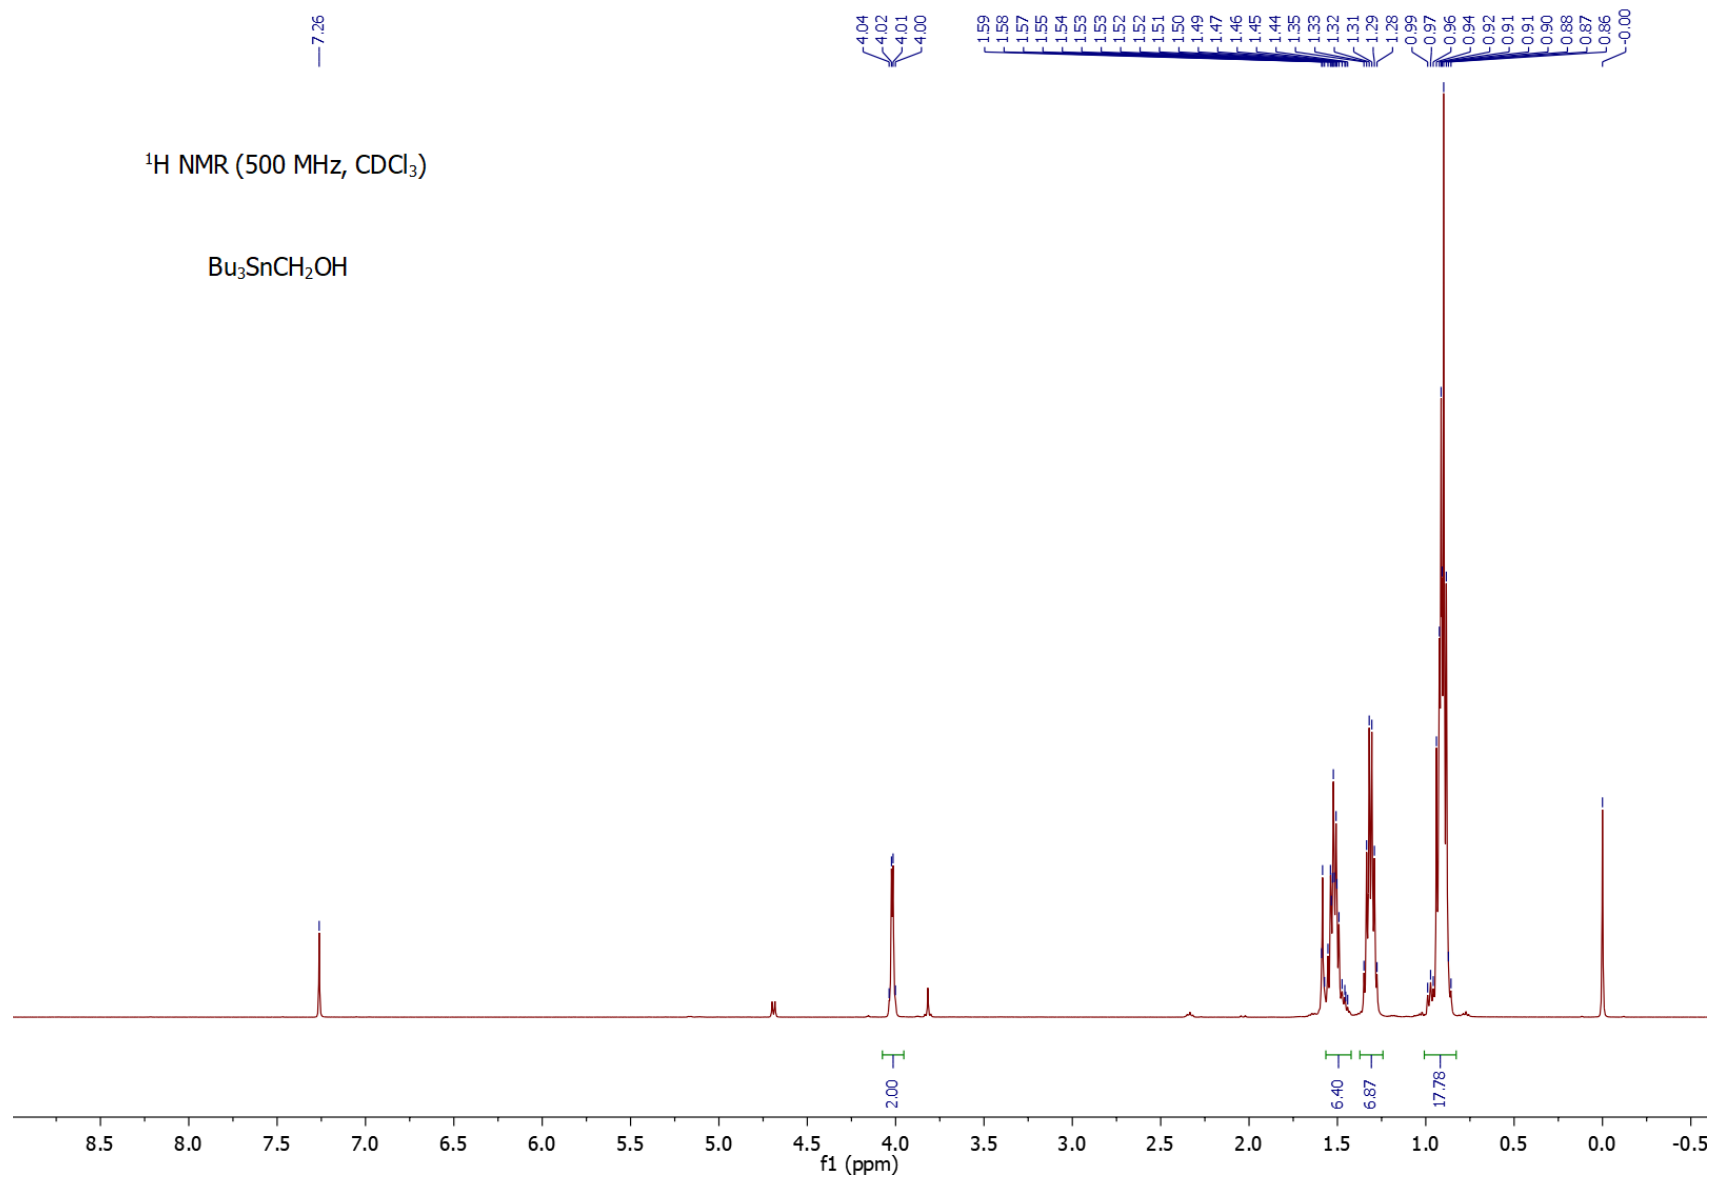

$^{13}\text{C}\{^1\text{H}\}$  NMR (125 MHz,  $\text{CDCl}_3$ )

$\text{Bu}_3\text{SnCH}_2\text{OH}$

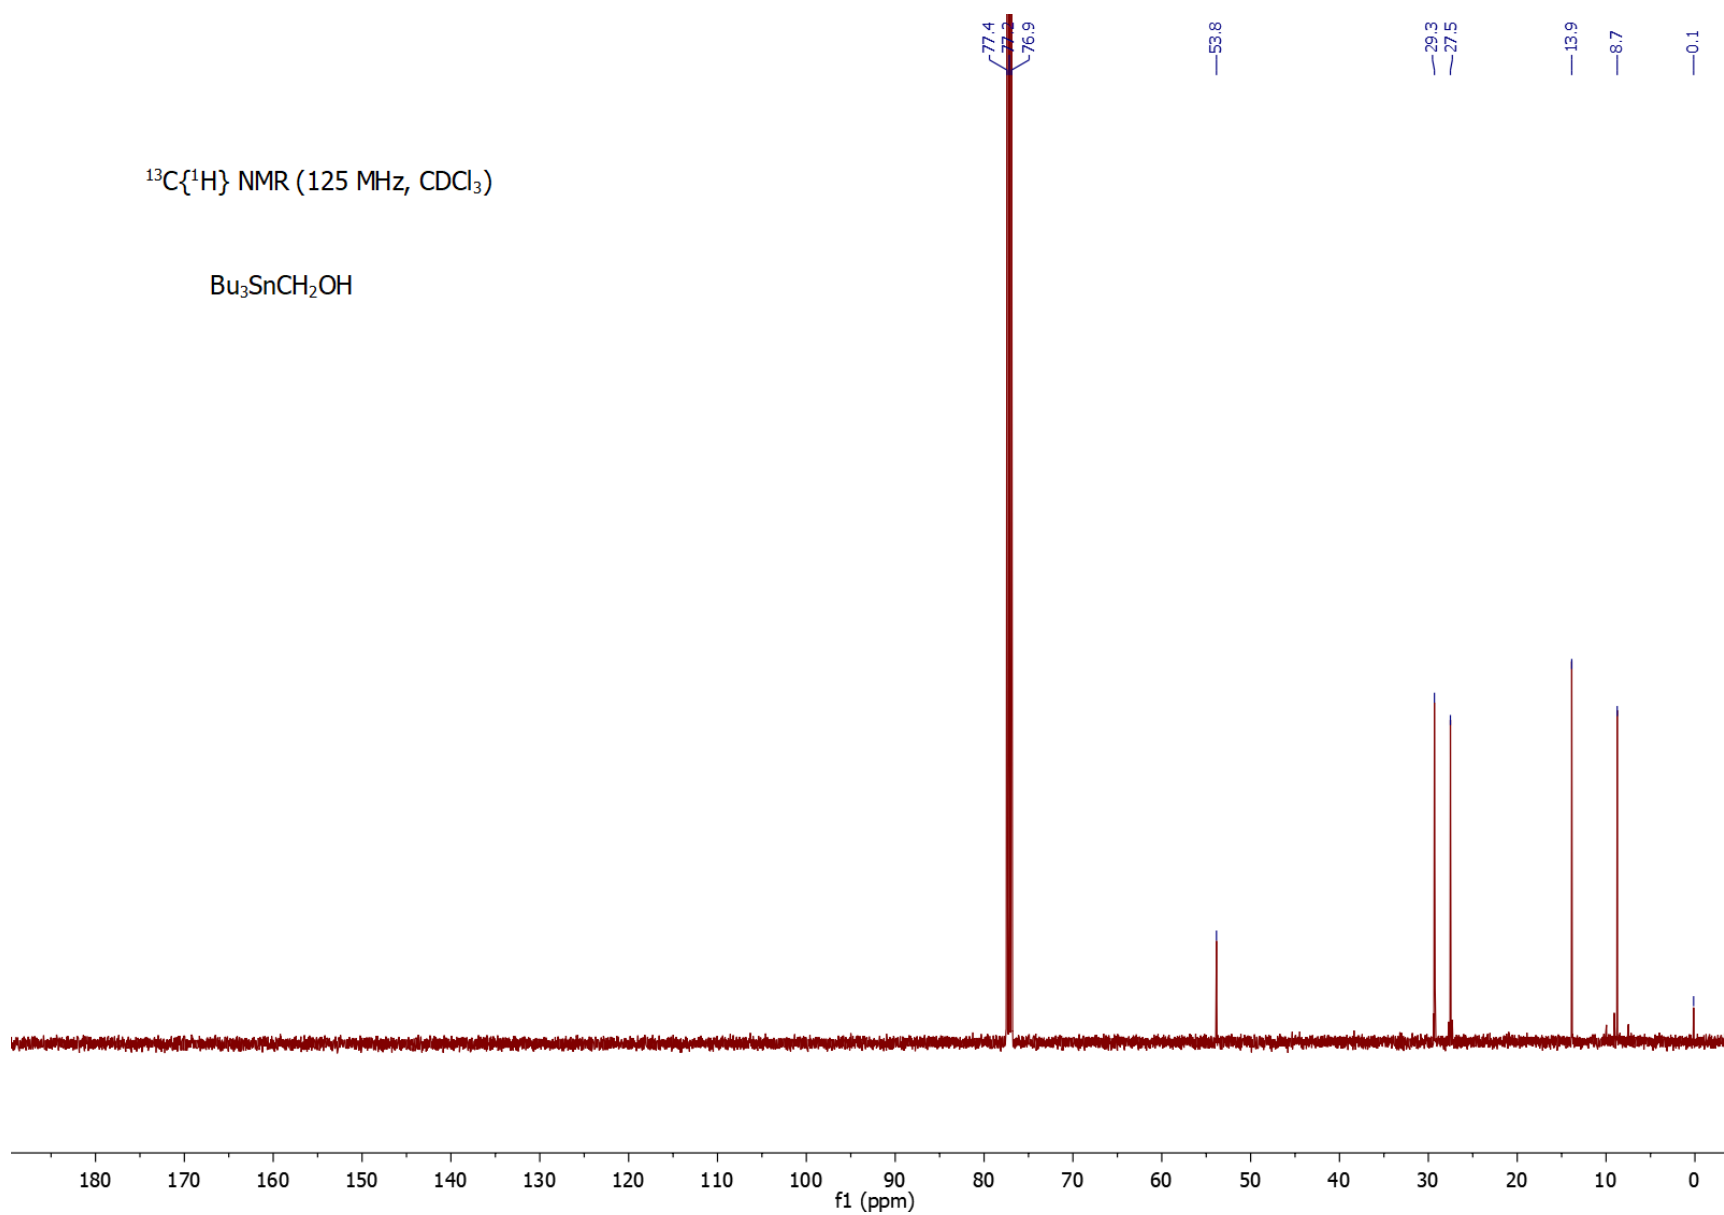

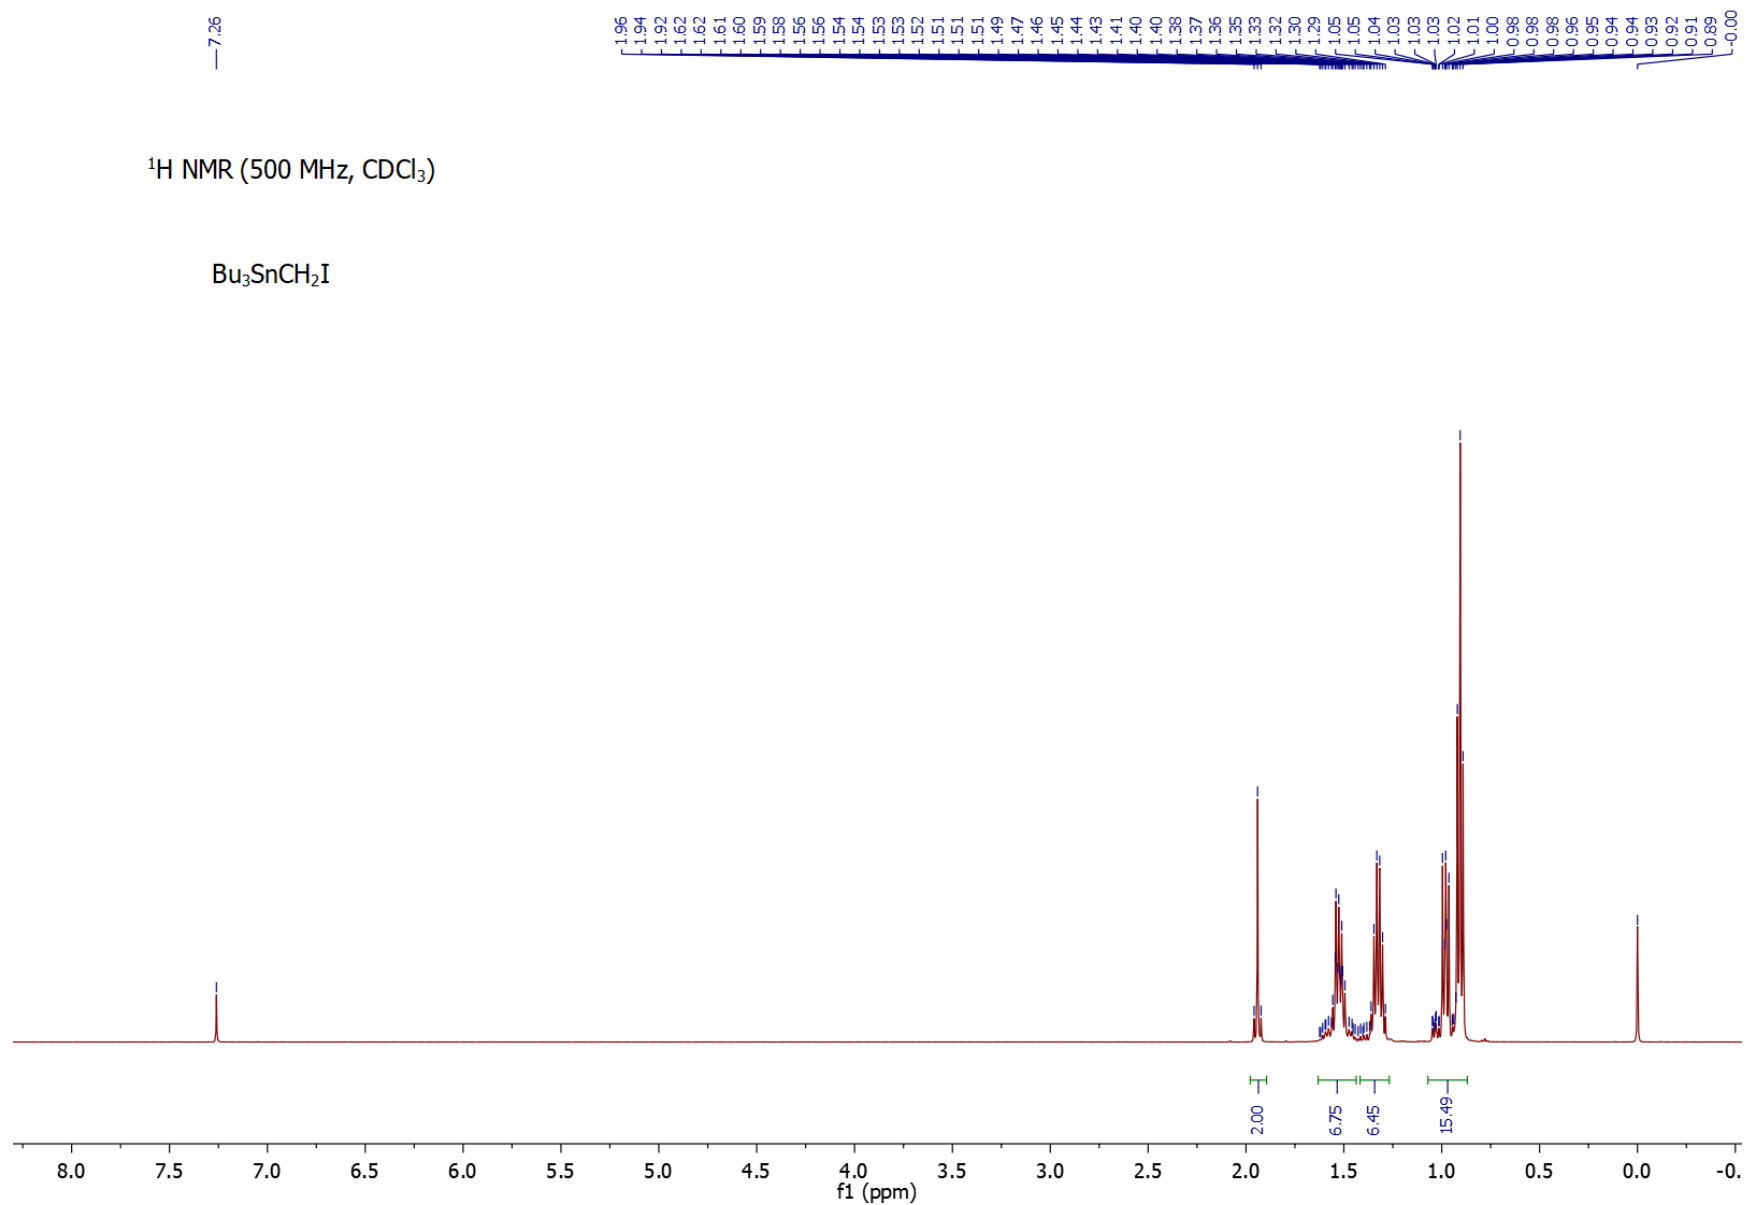

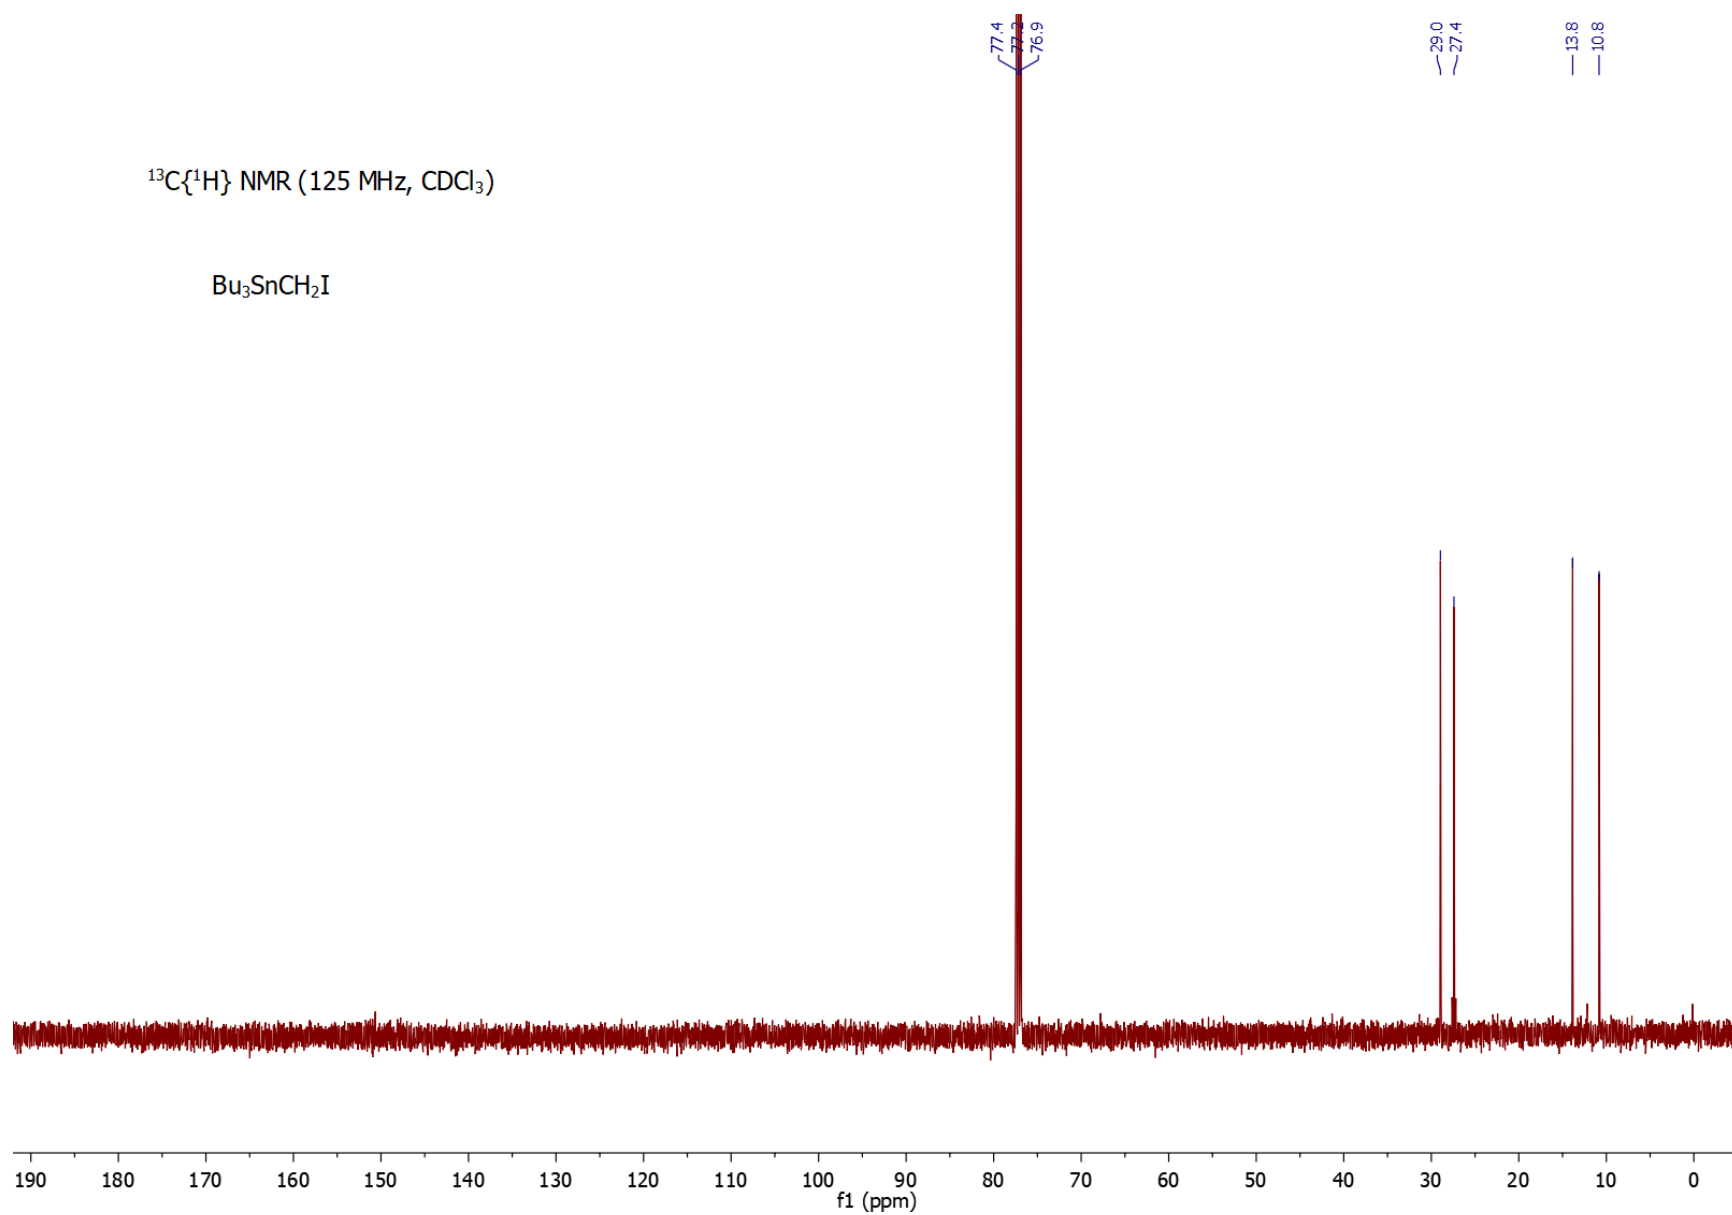

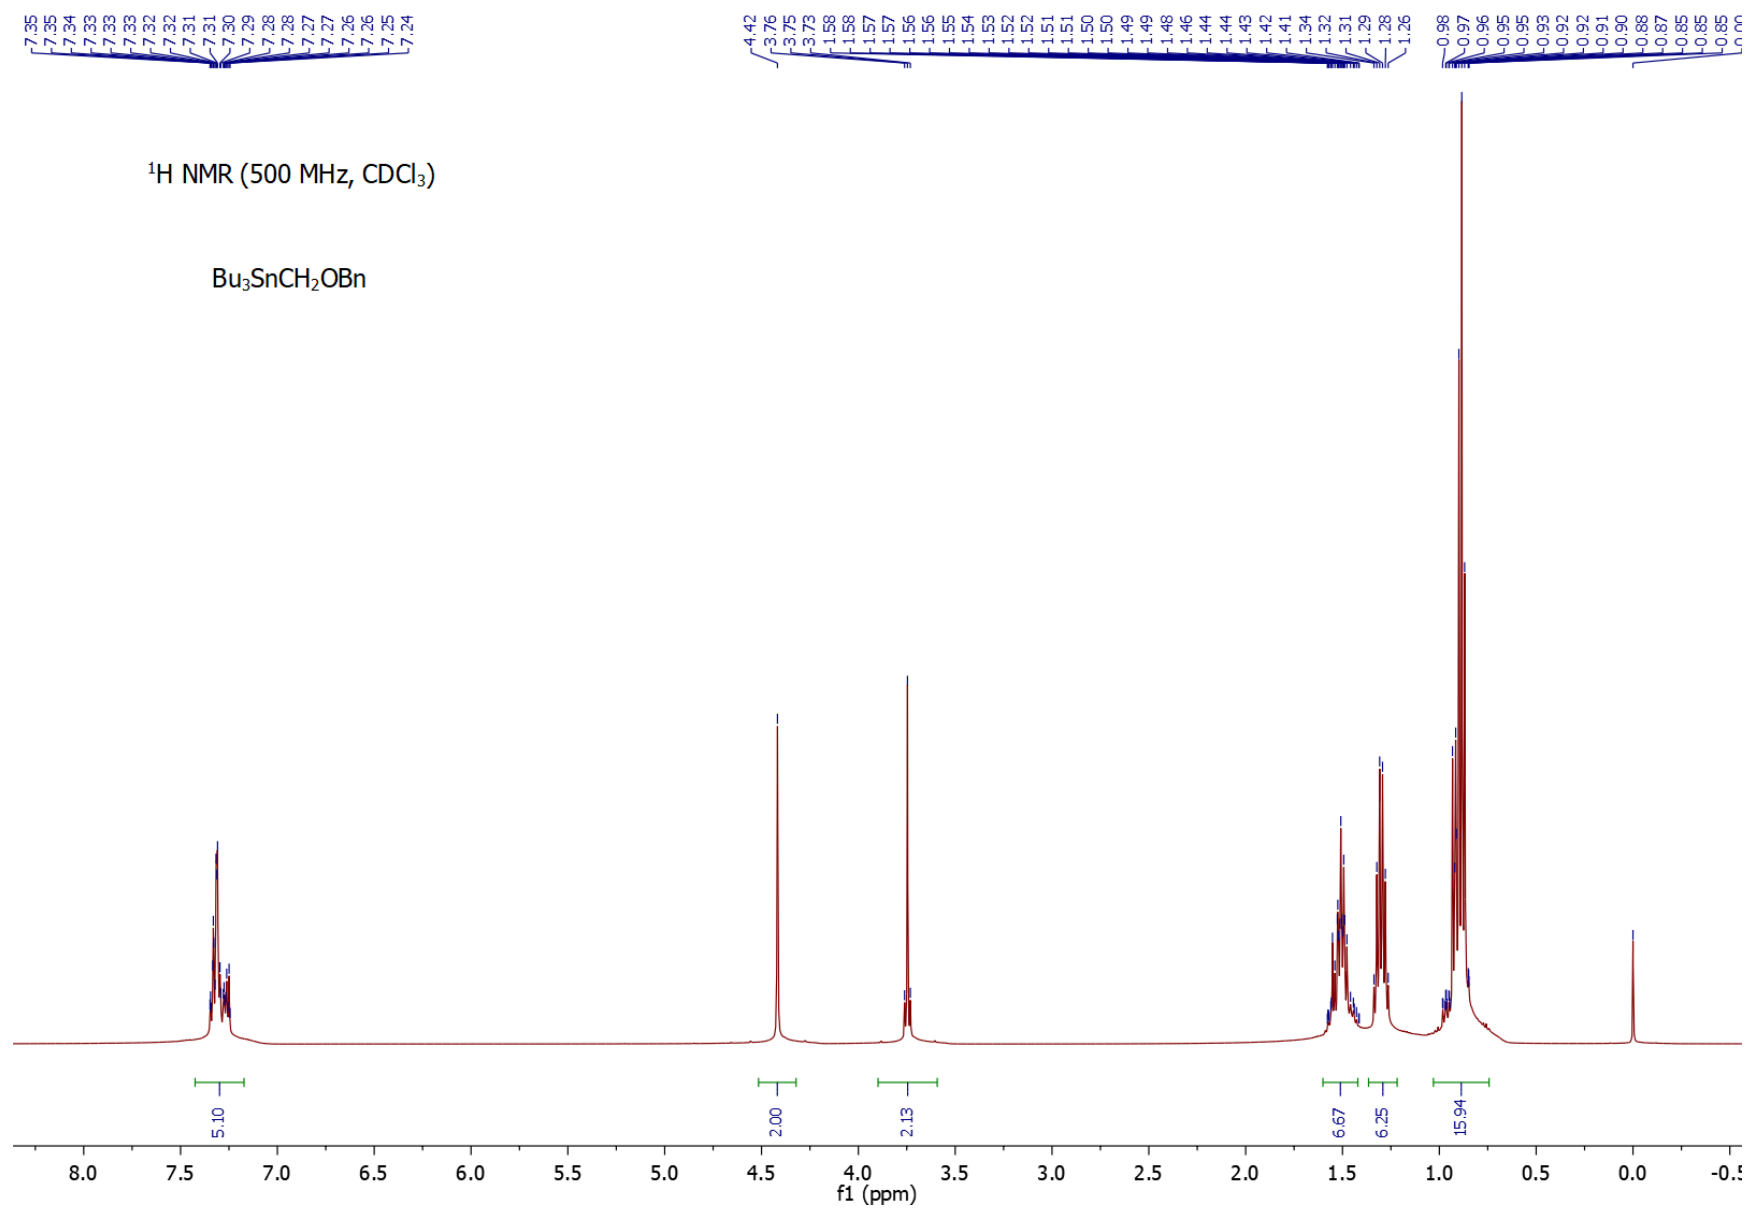

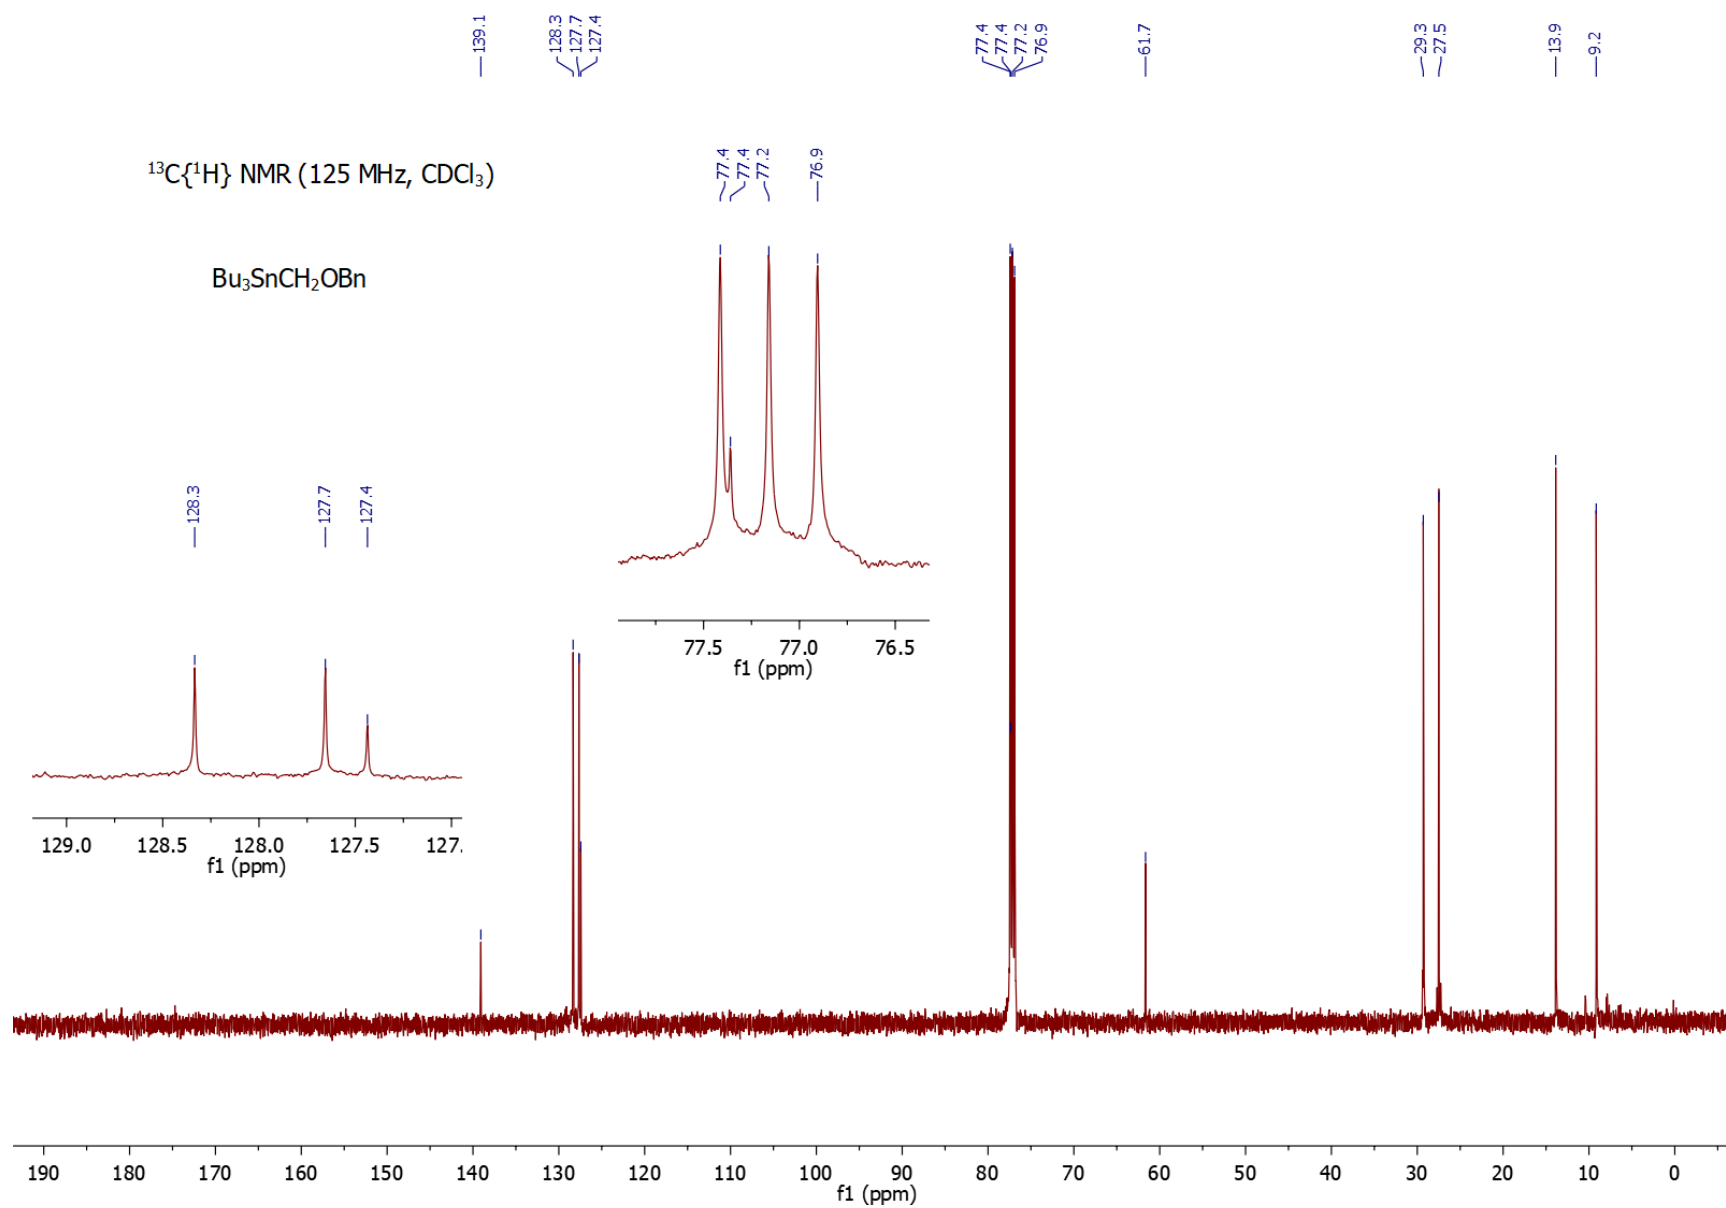



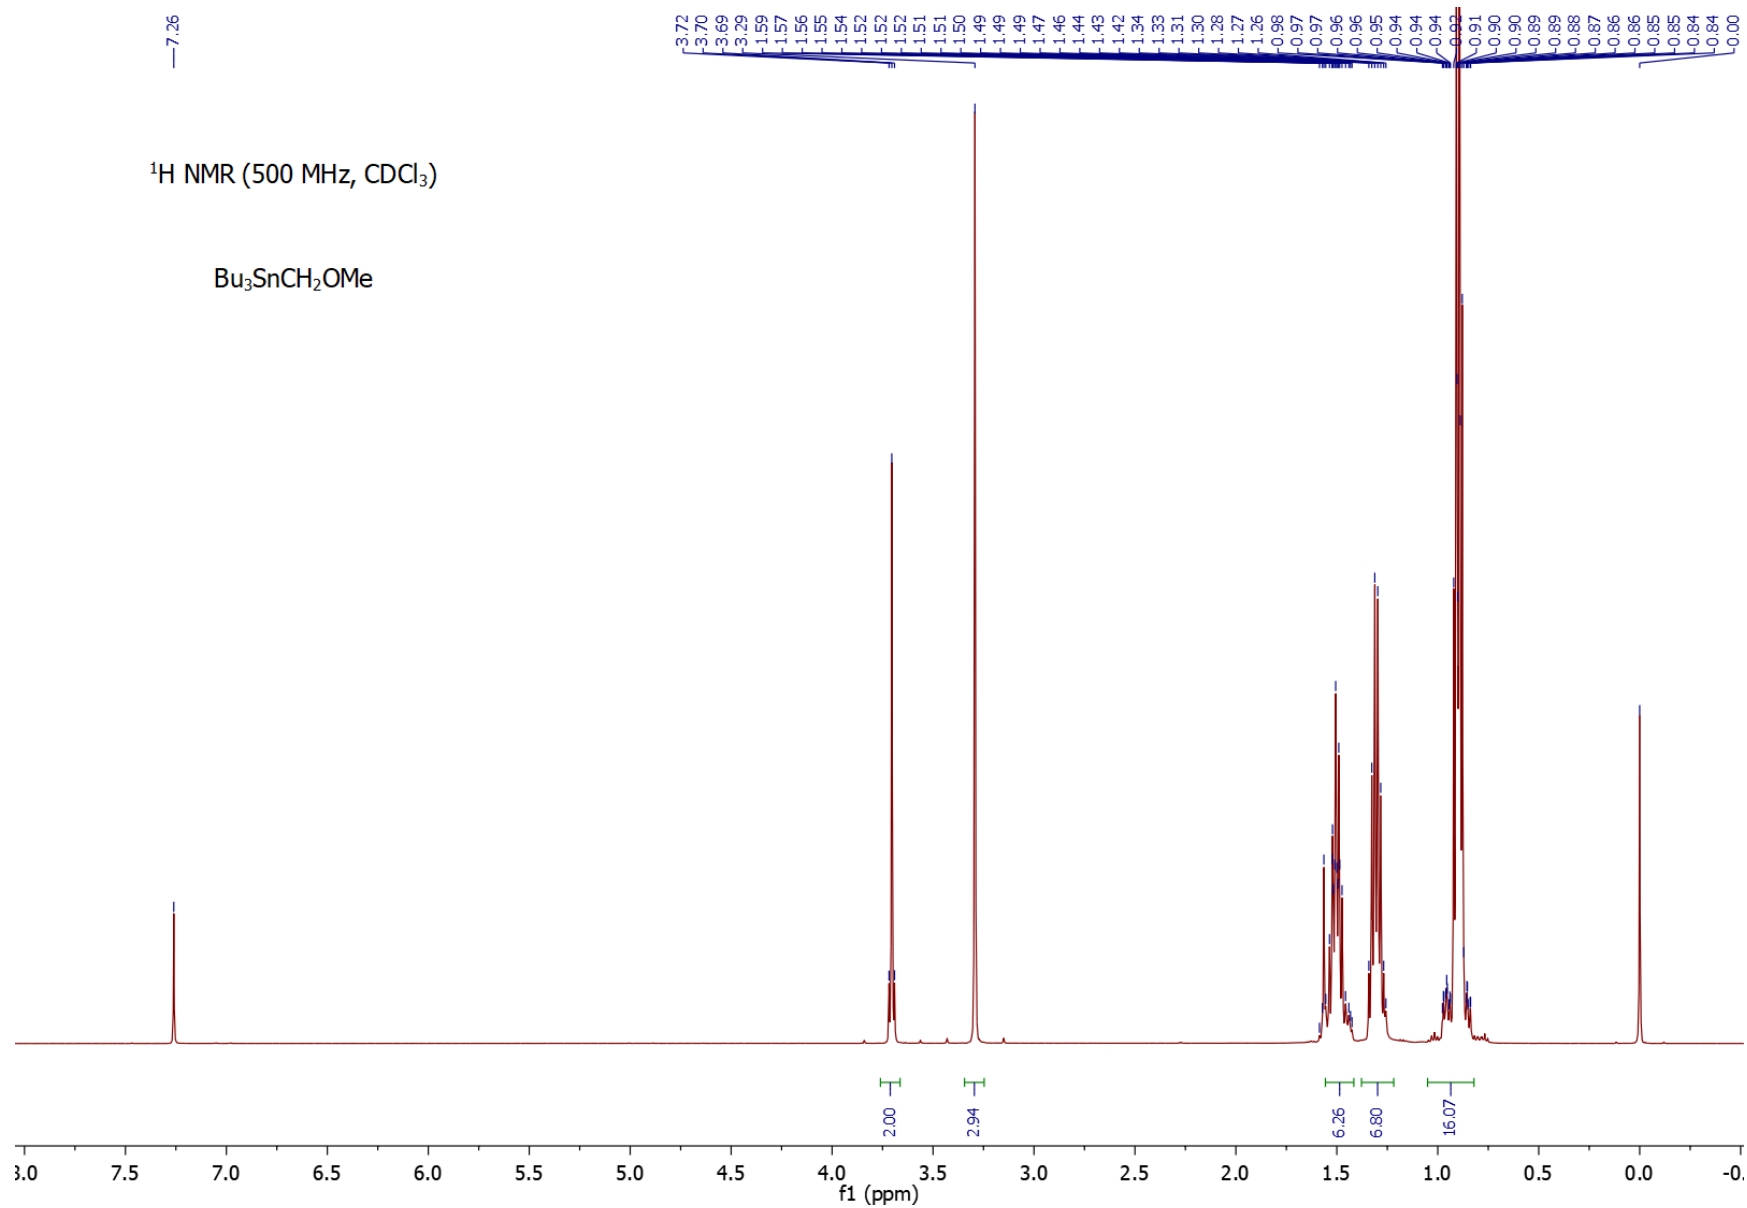

$^{13}\text{C}\{^1\text{H}\}$  NMR (125 MHz,  $\text{CDCl}_3$ )

$\text{Bu}_3\text{SnCH}_2\text{OMe}$

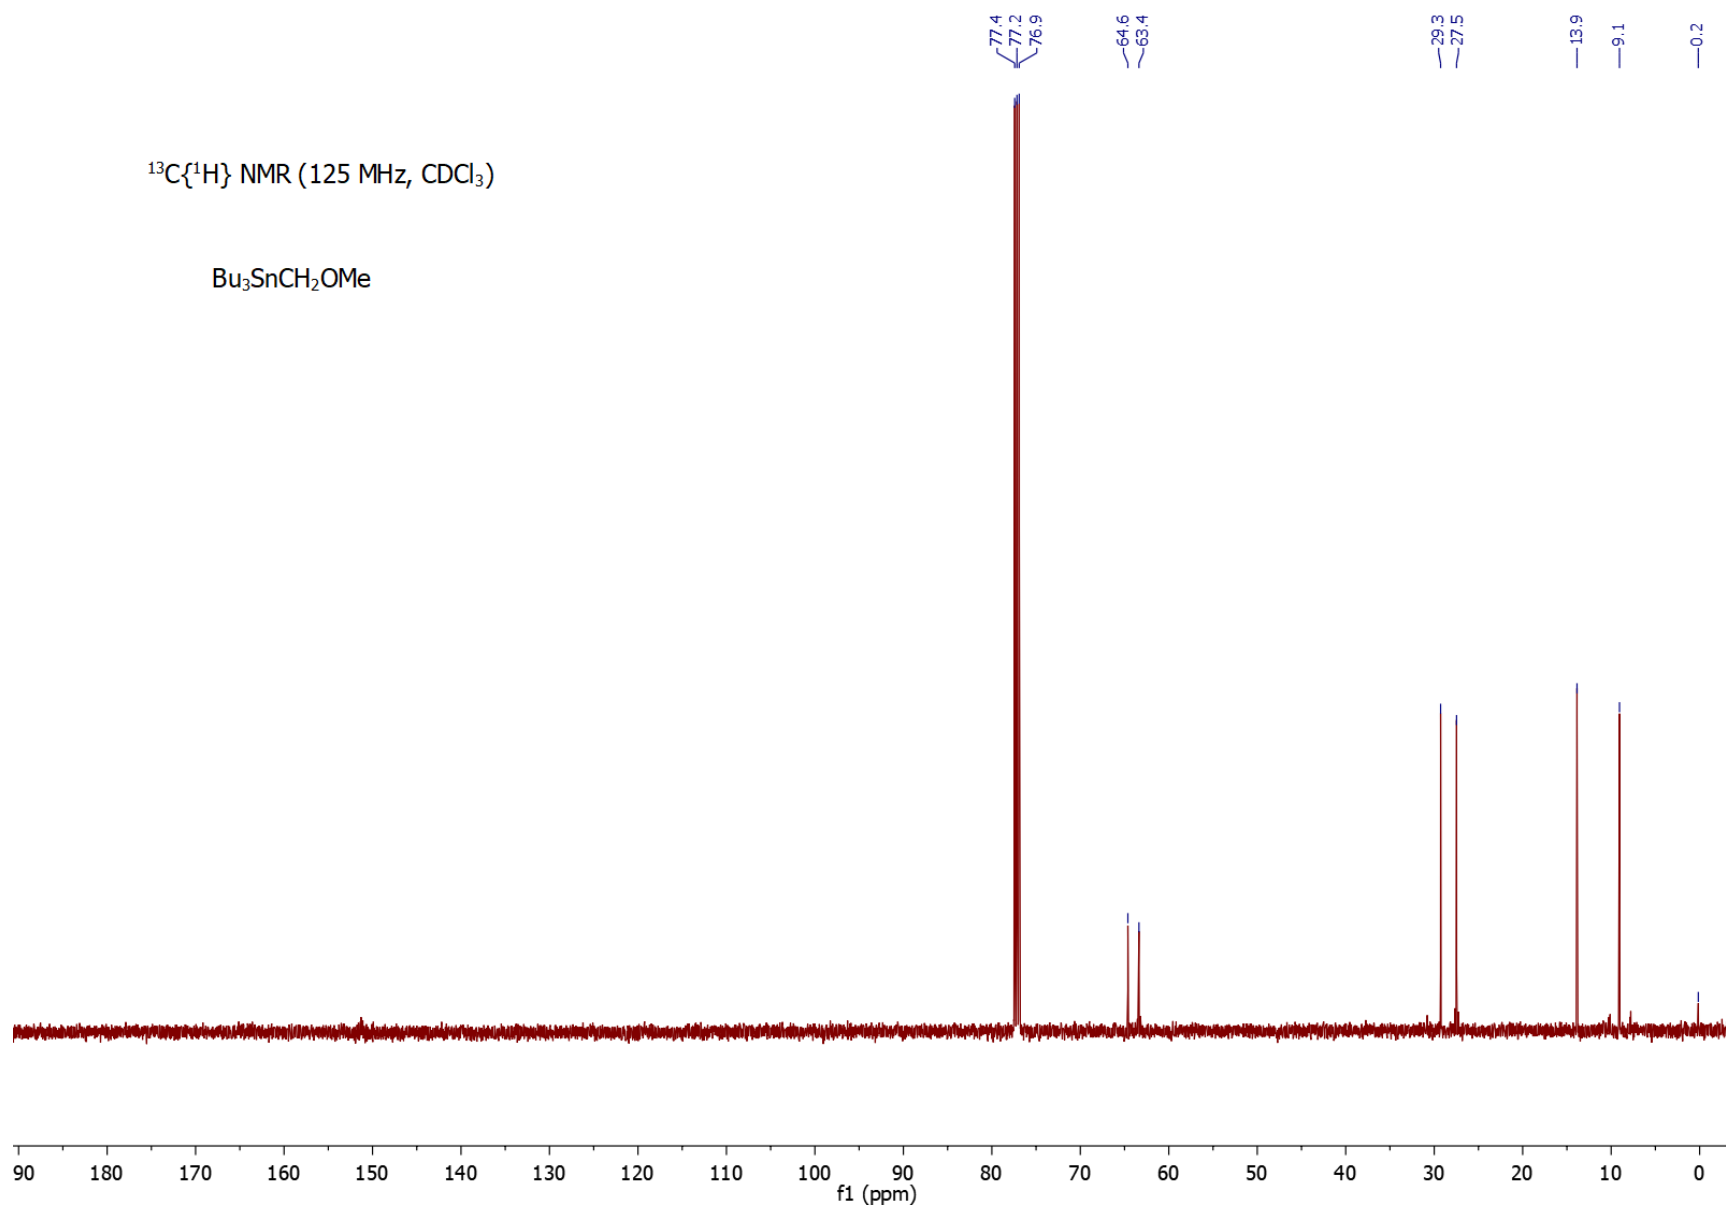

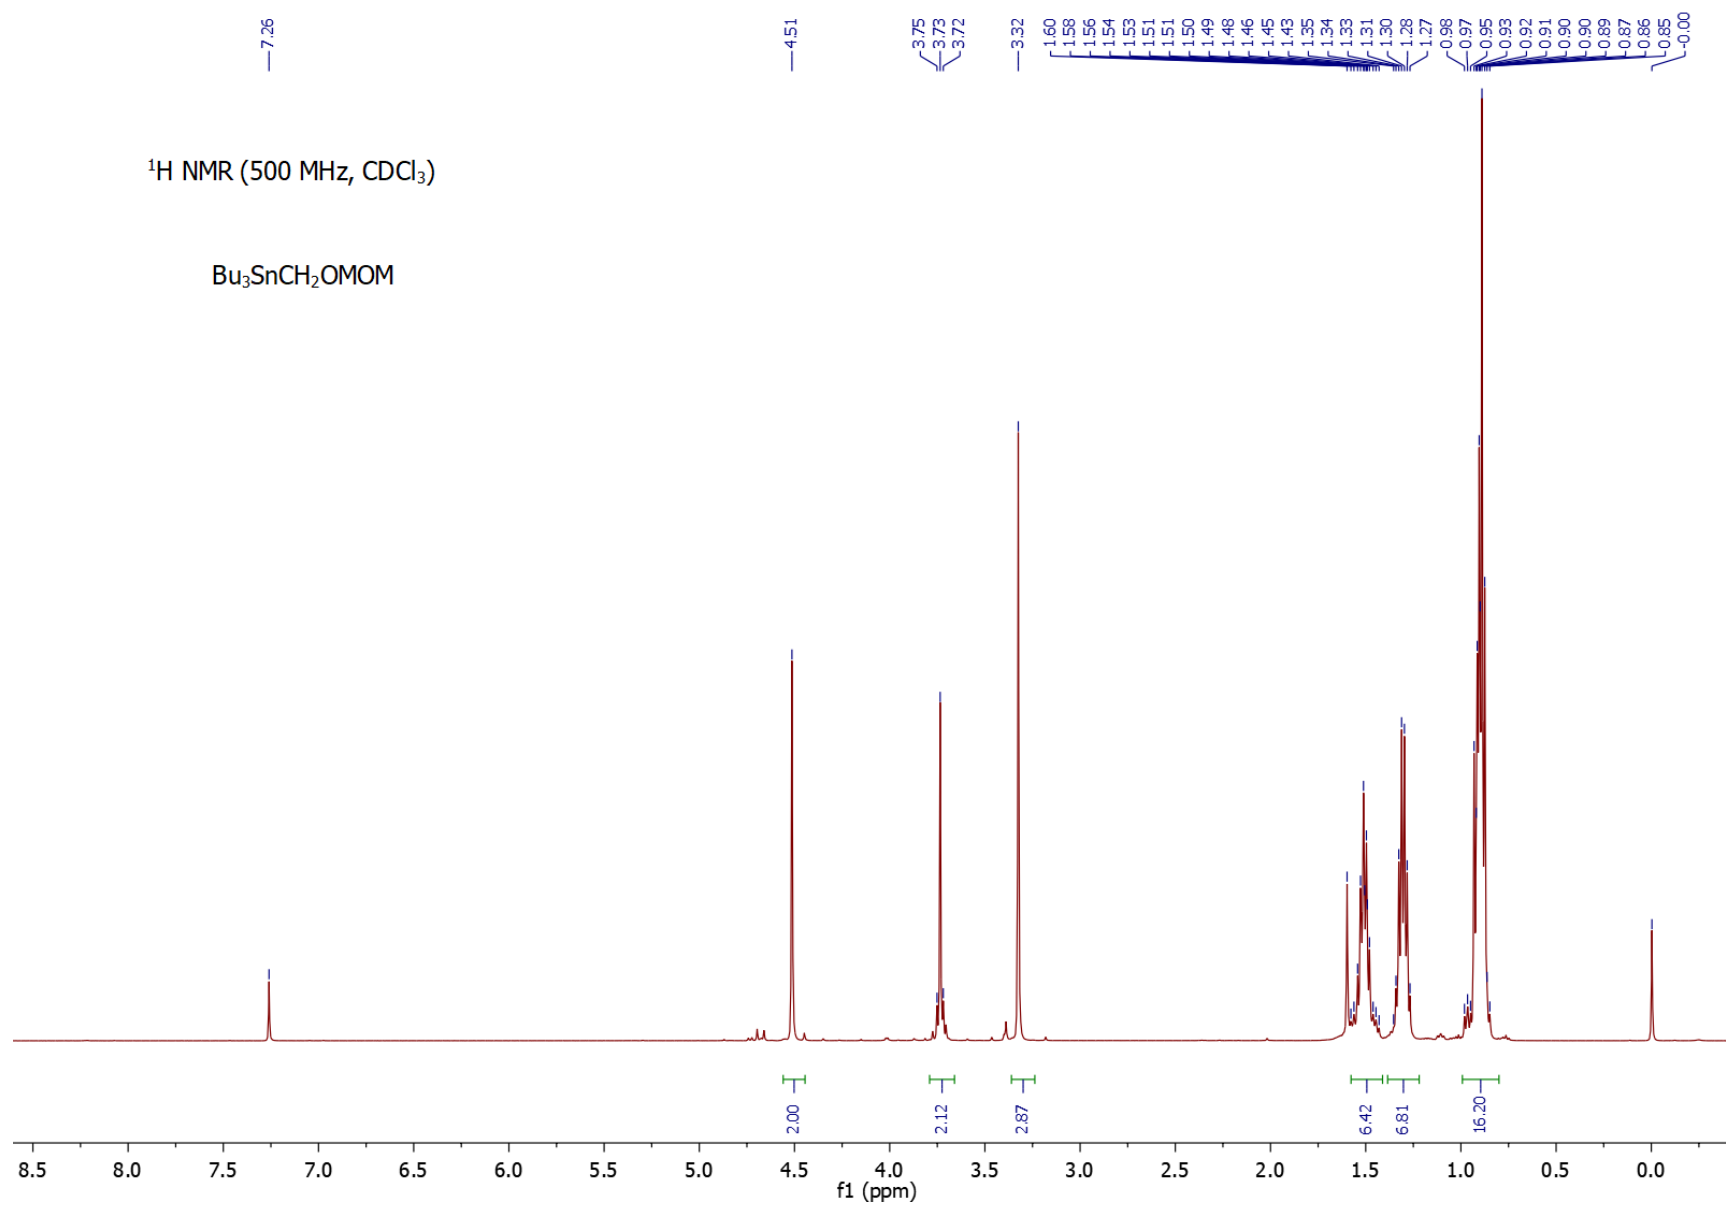

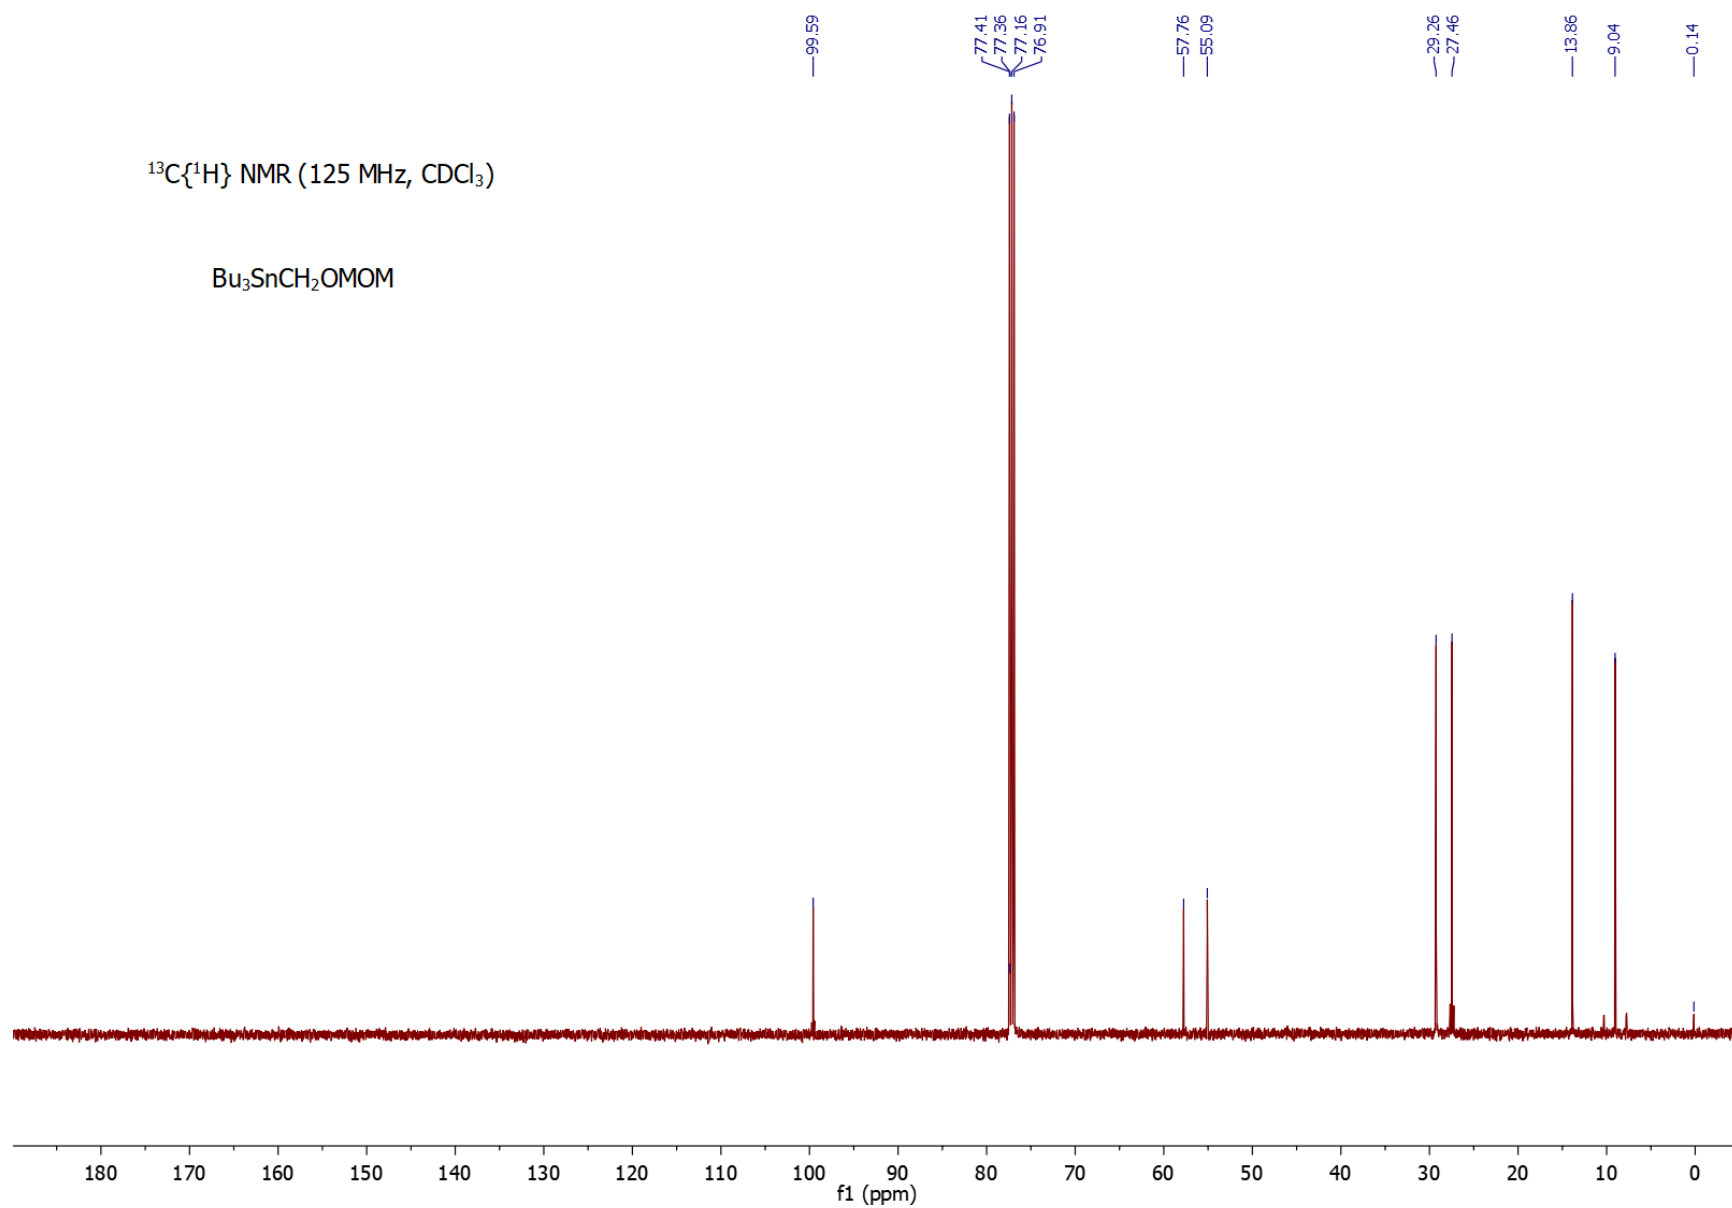

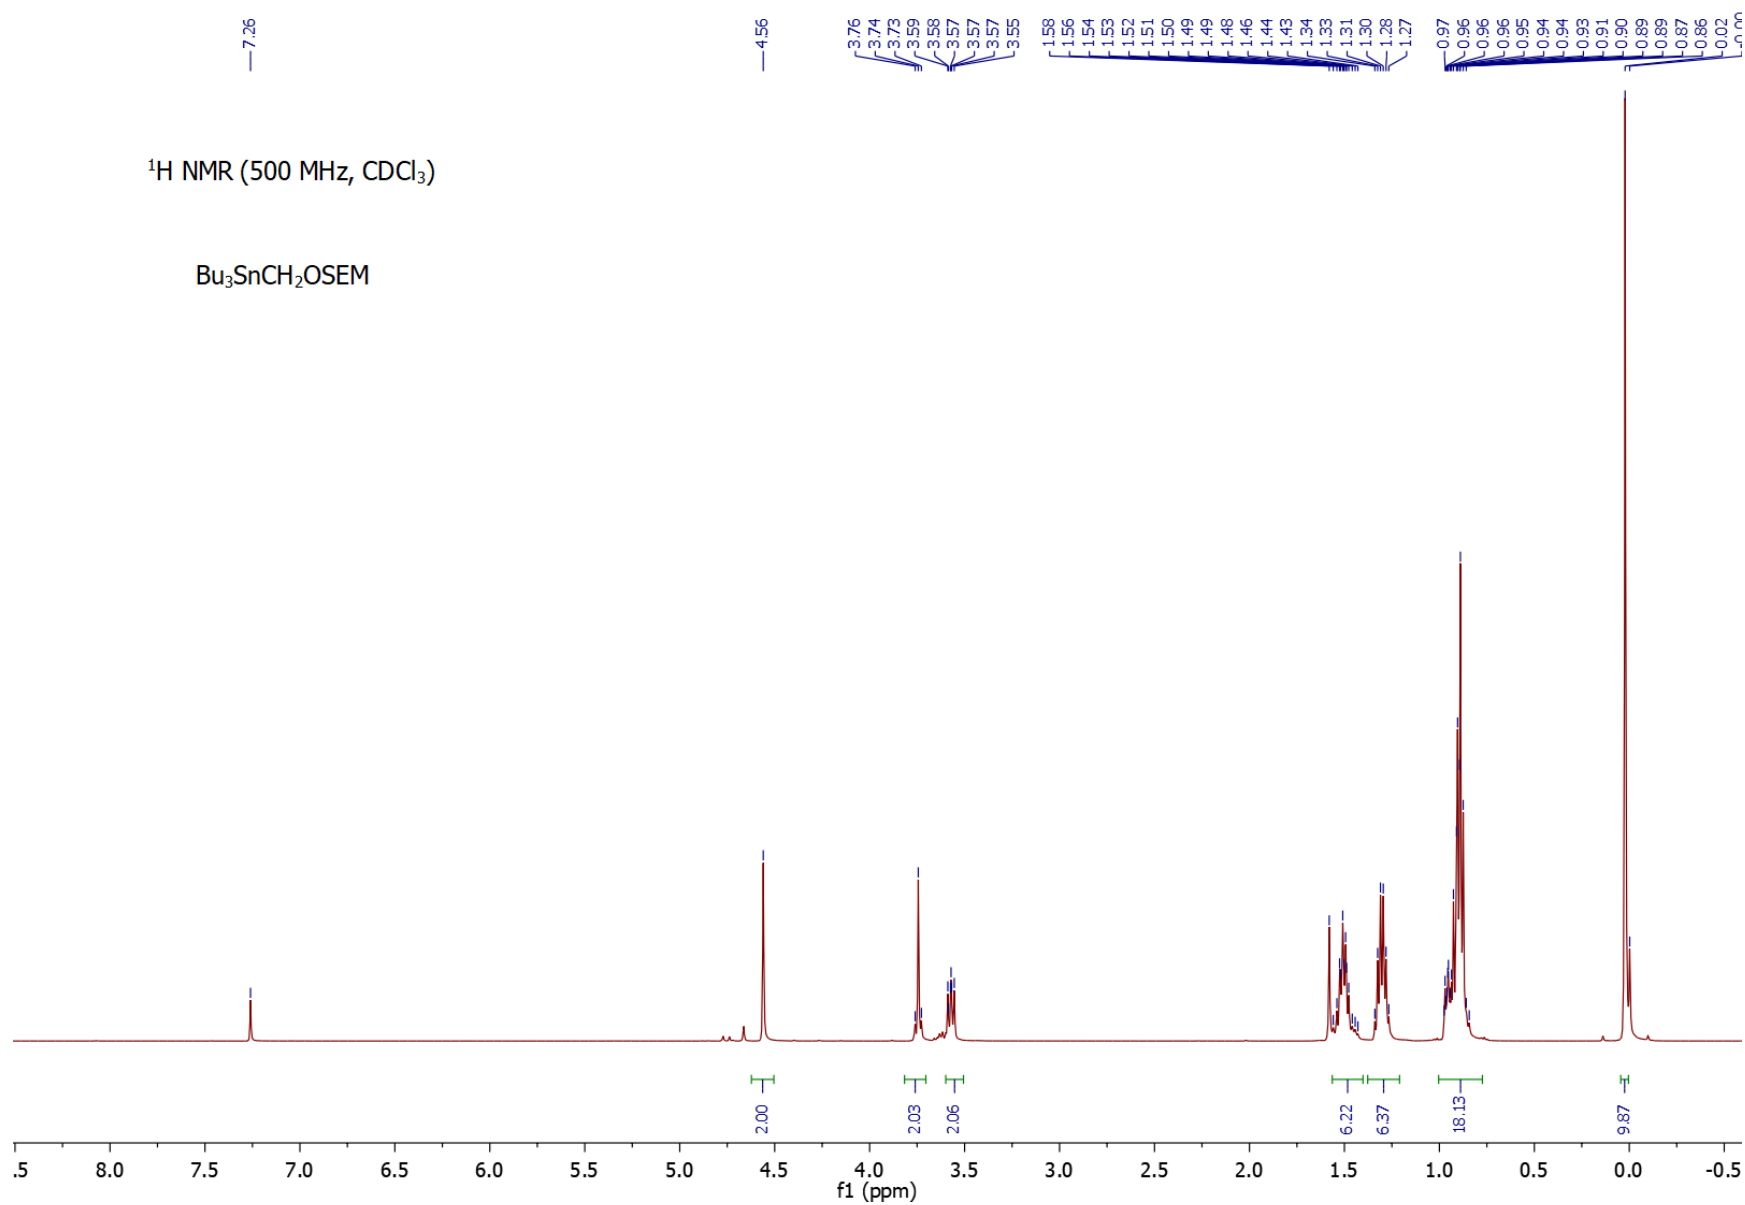

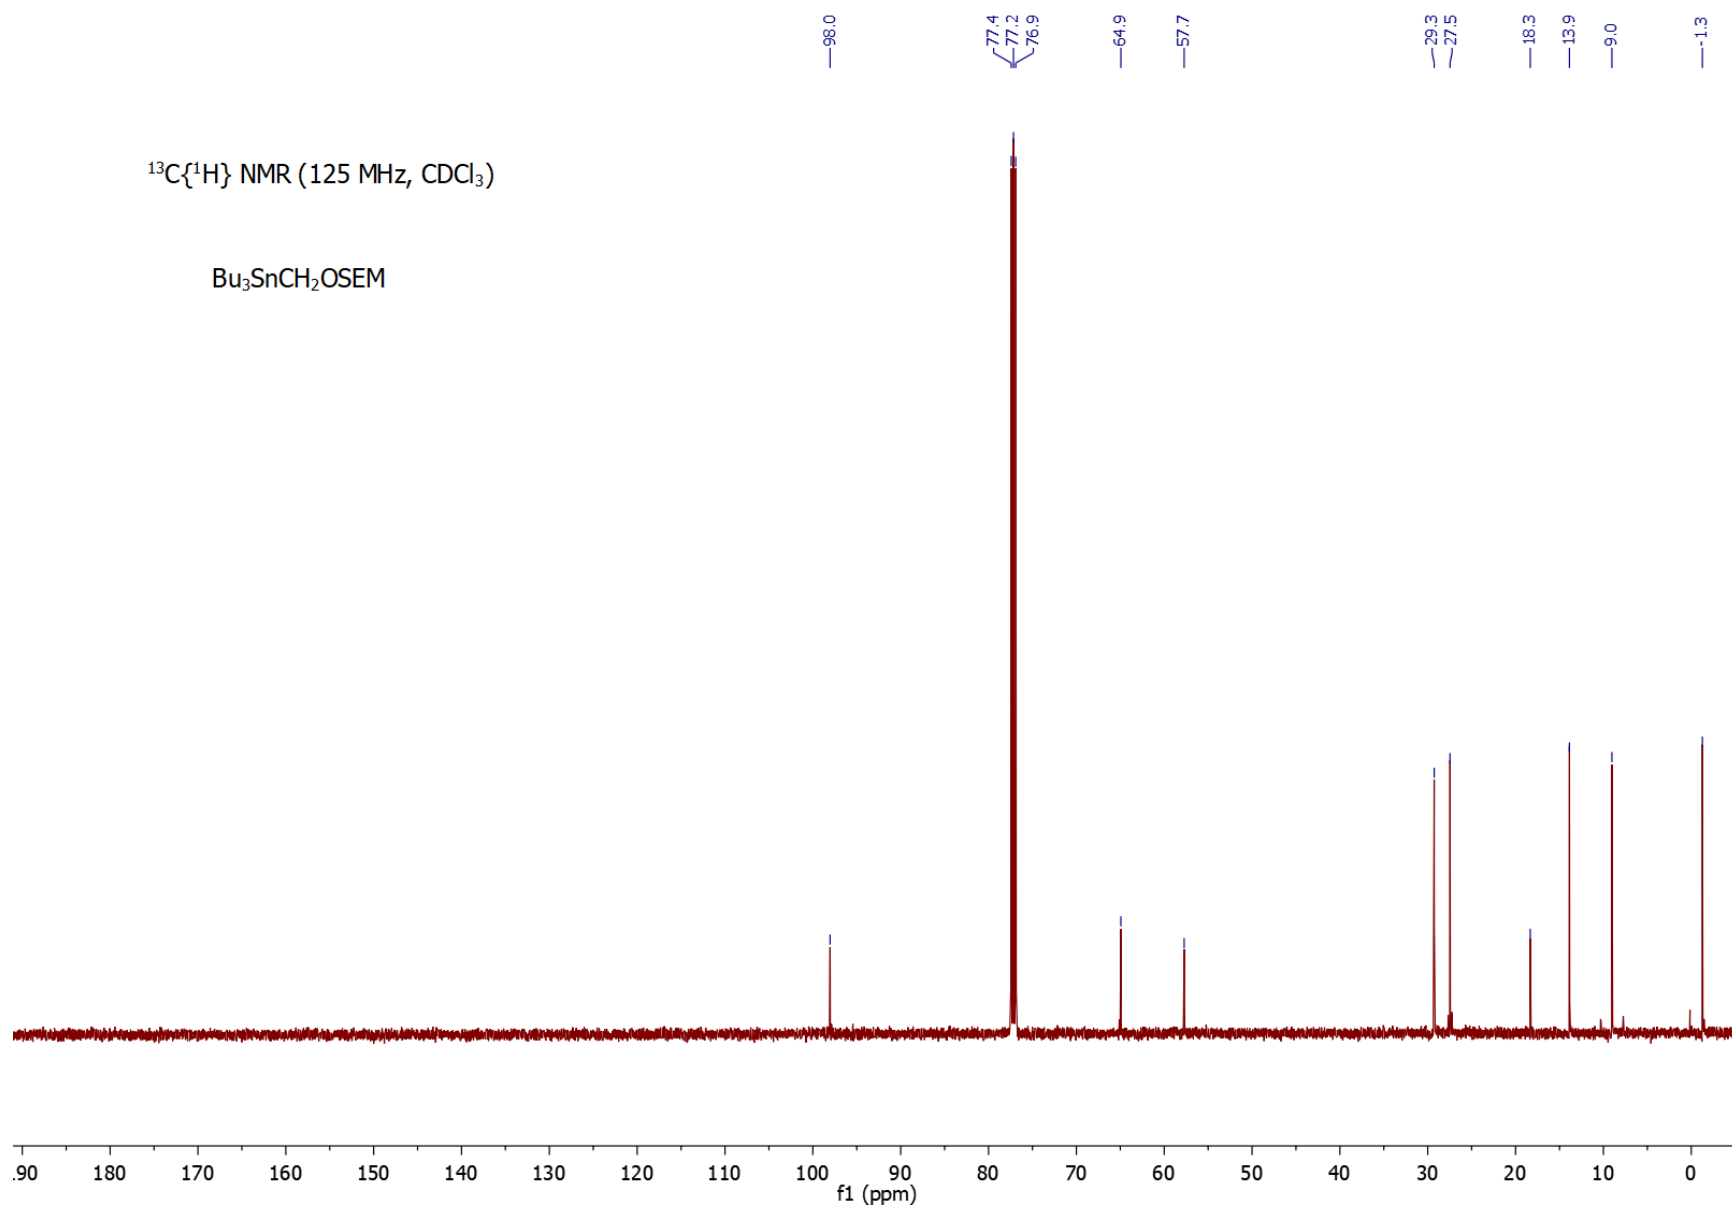

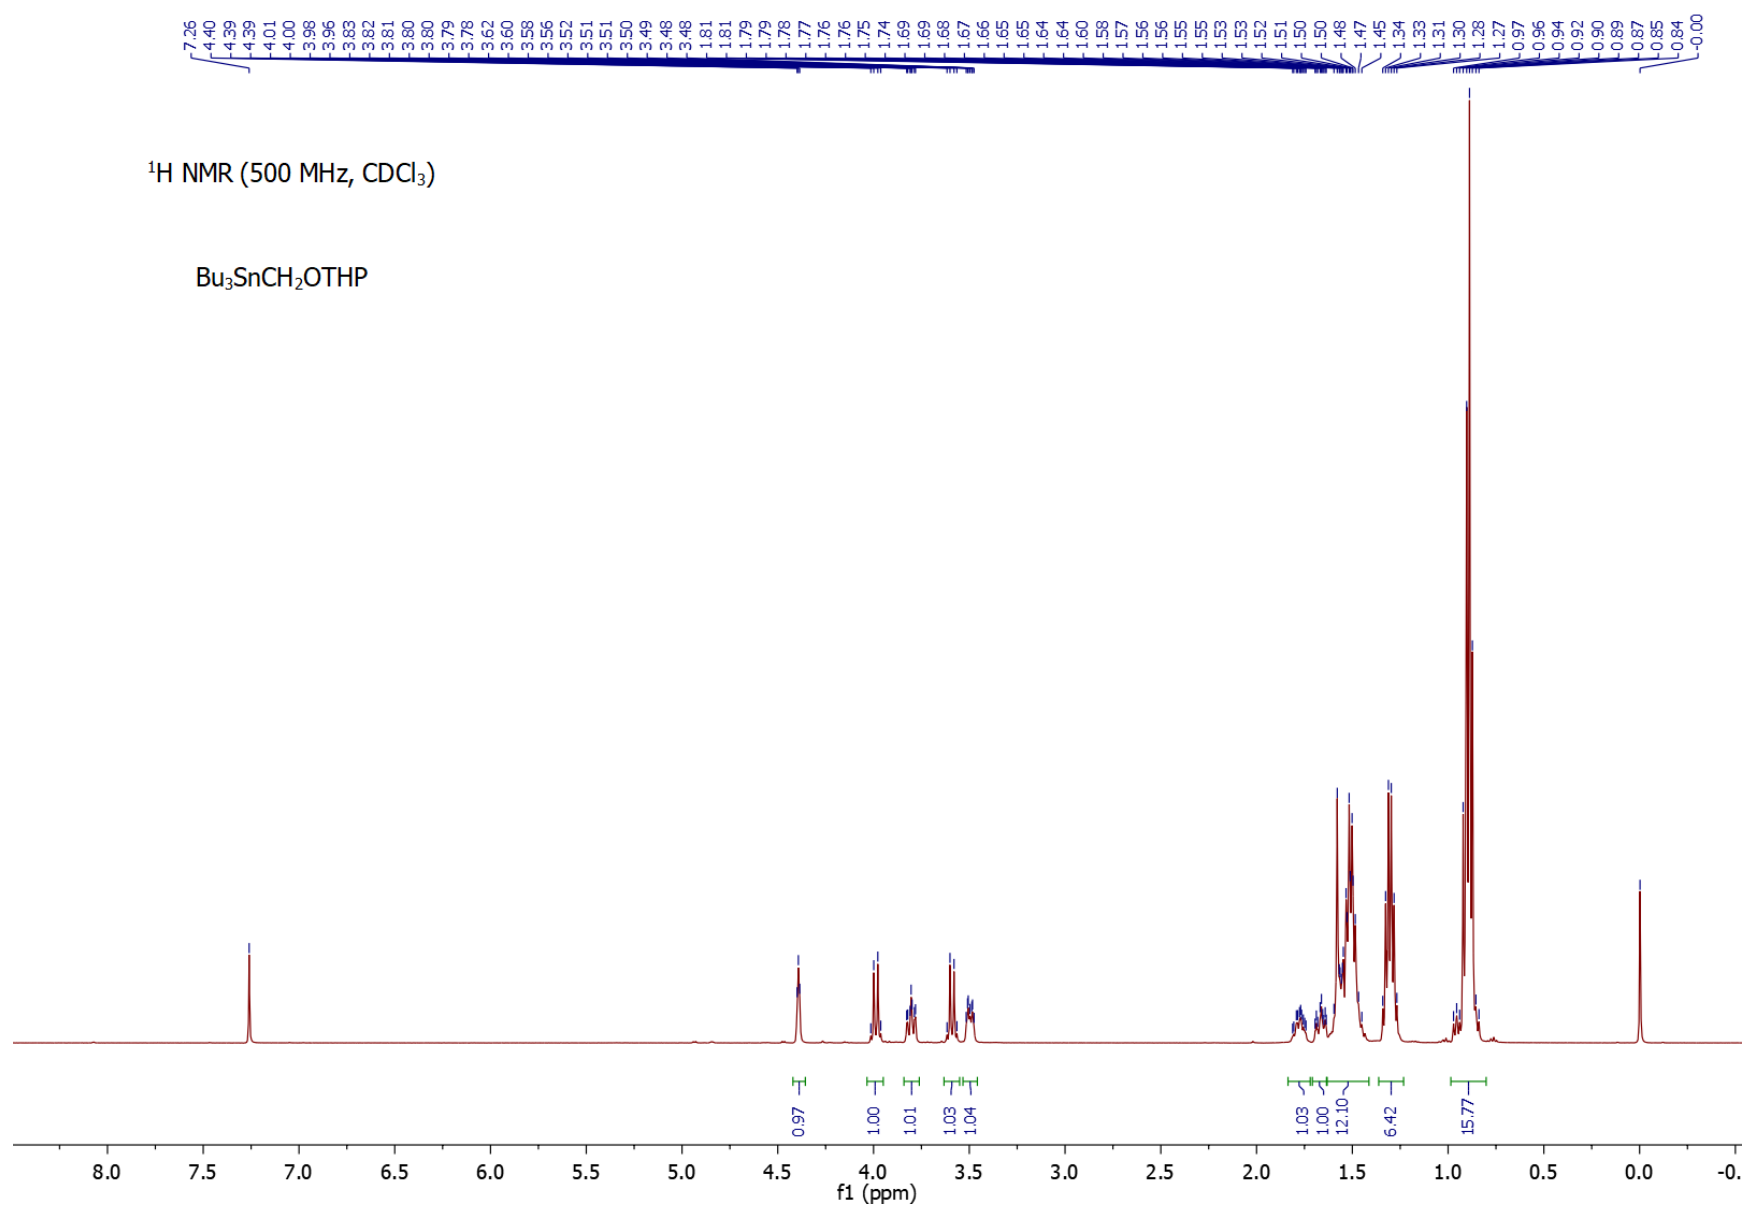

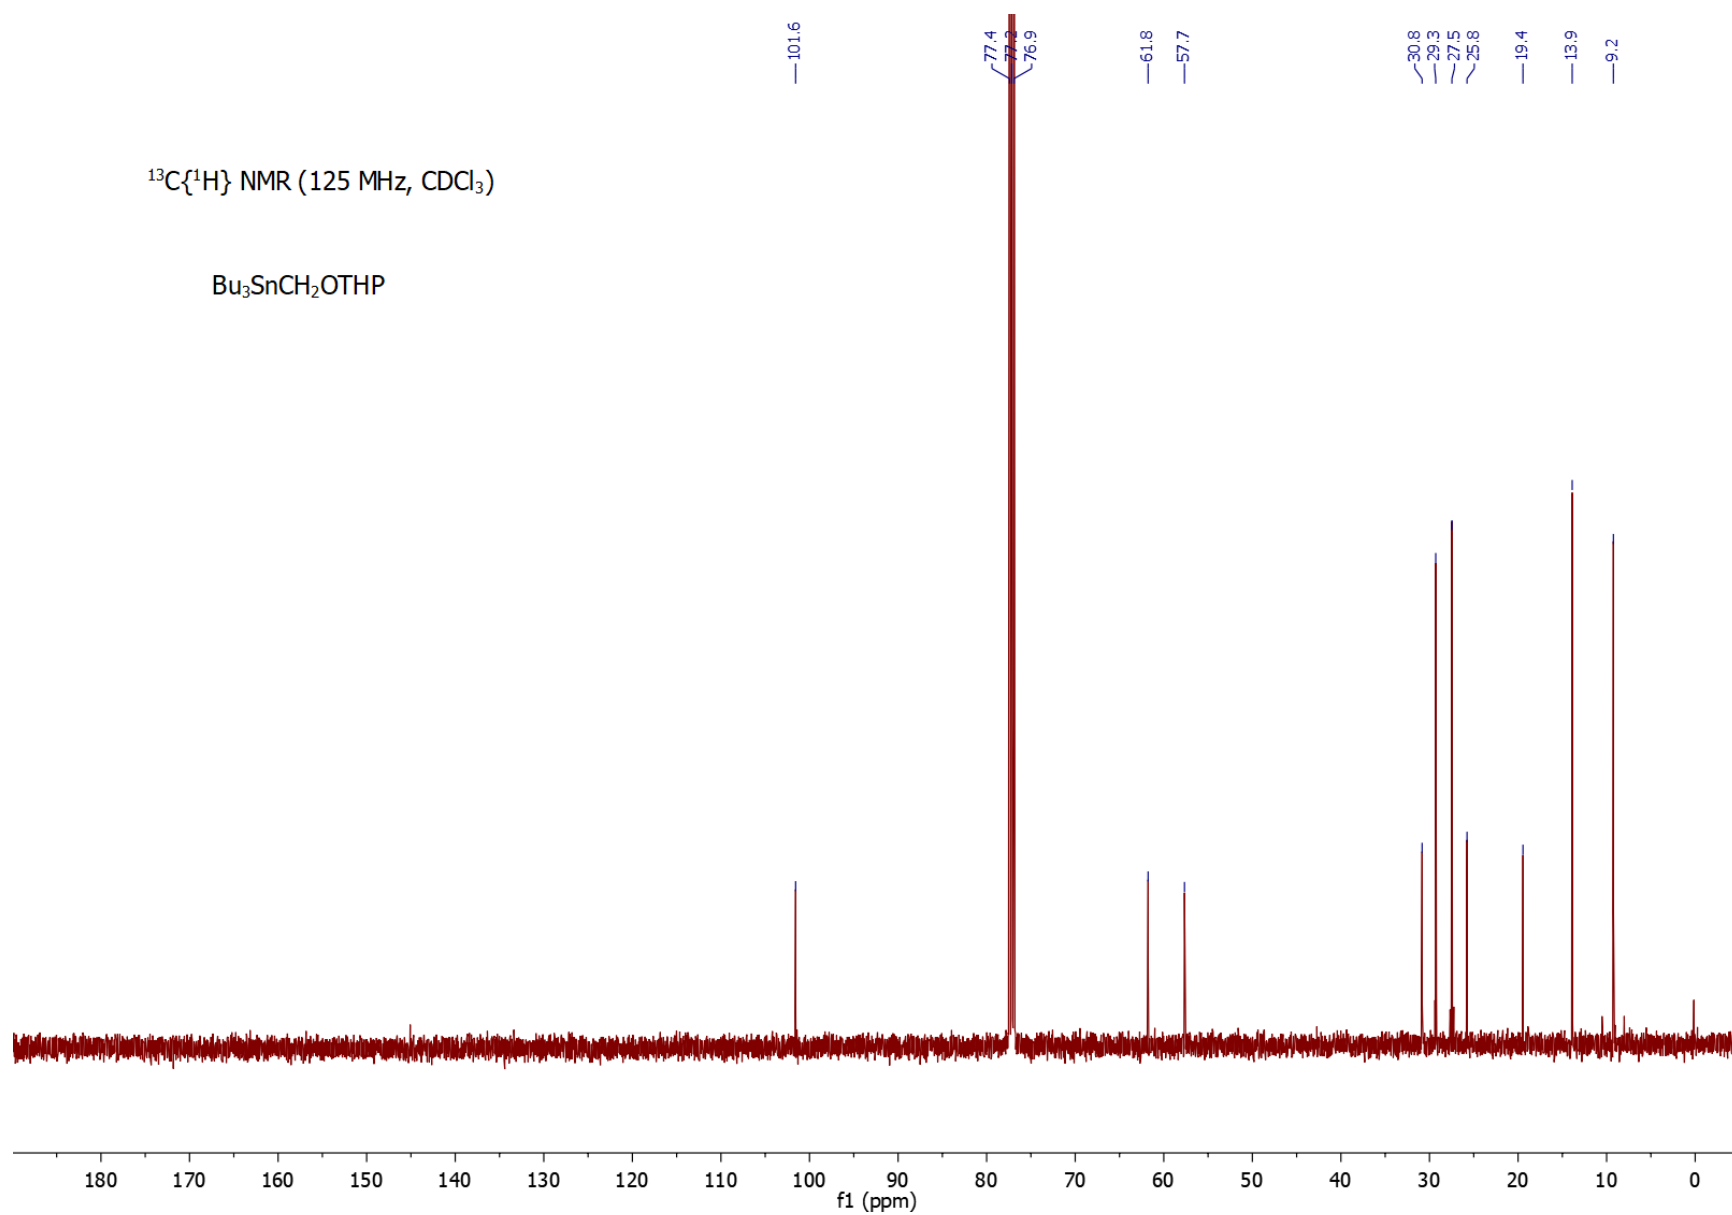



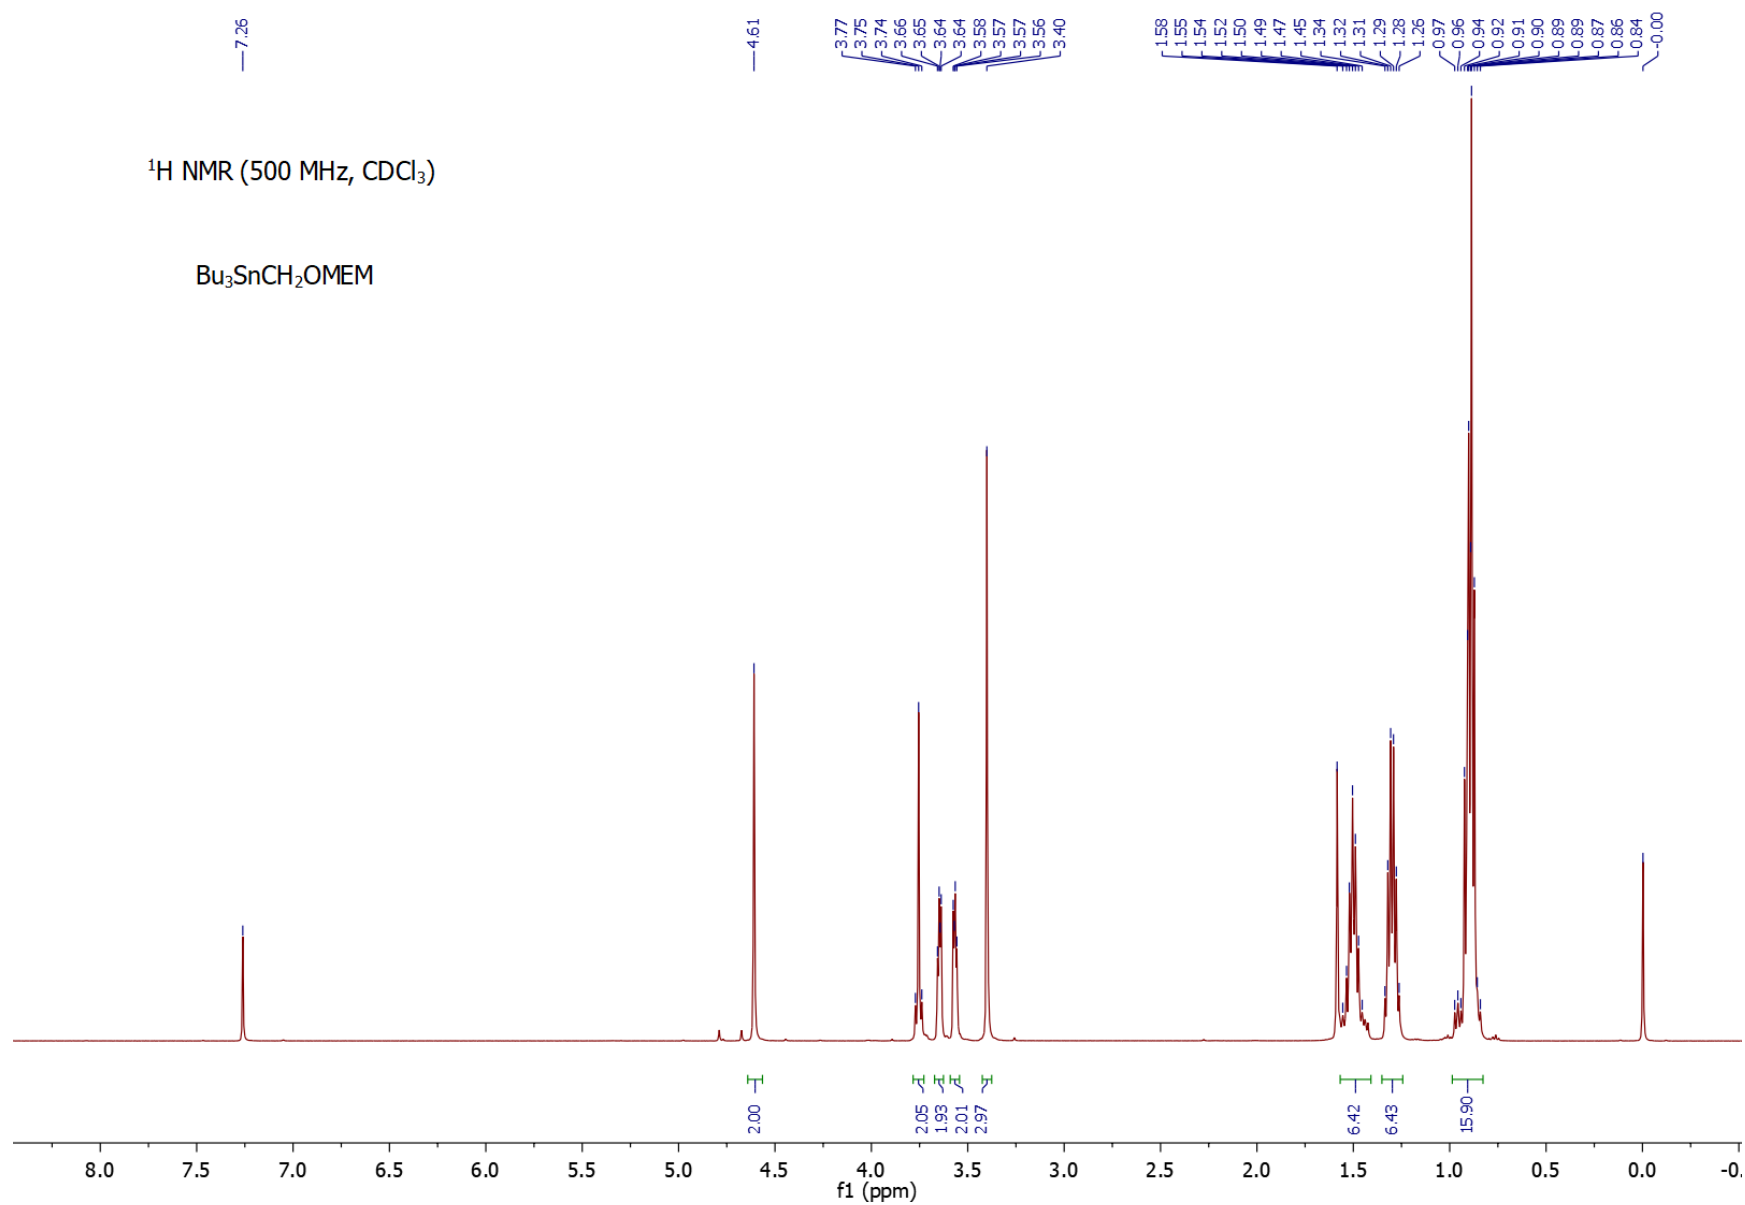

$^{13}\text{C}\{^1\text{H}\}$  NMR (125 MHz,  $\text{CDCl}_3$ )

$\text{Bu}_3\text{SnCH}_2\text{OMEM}$

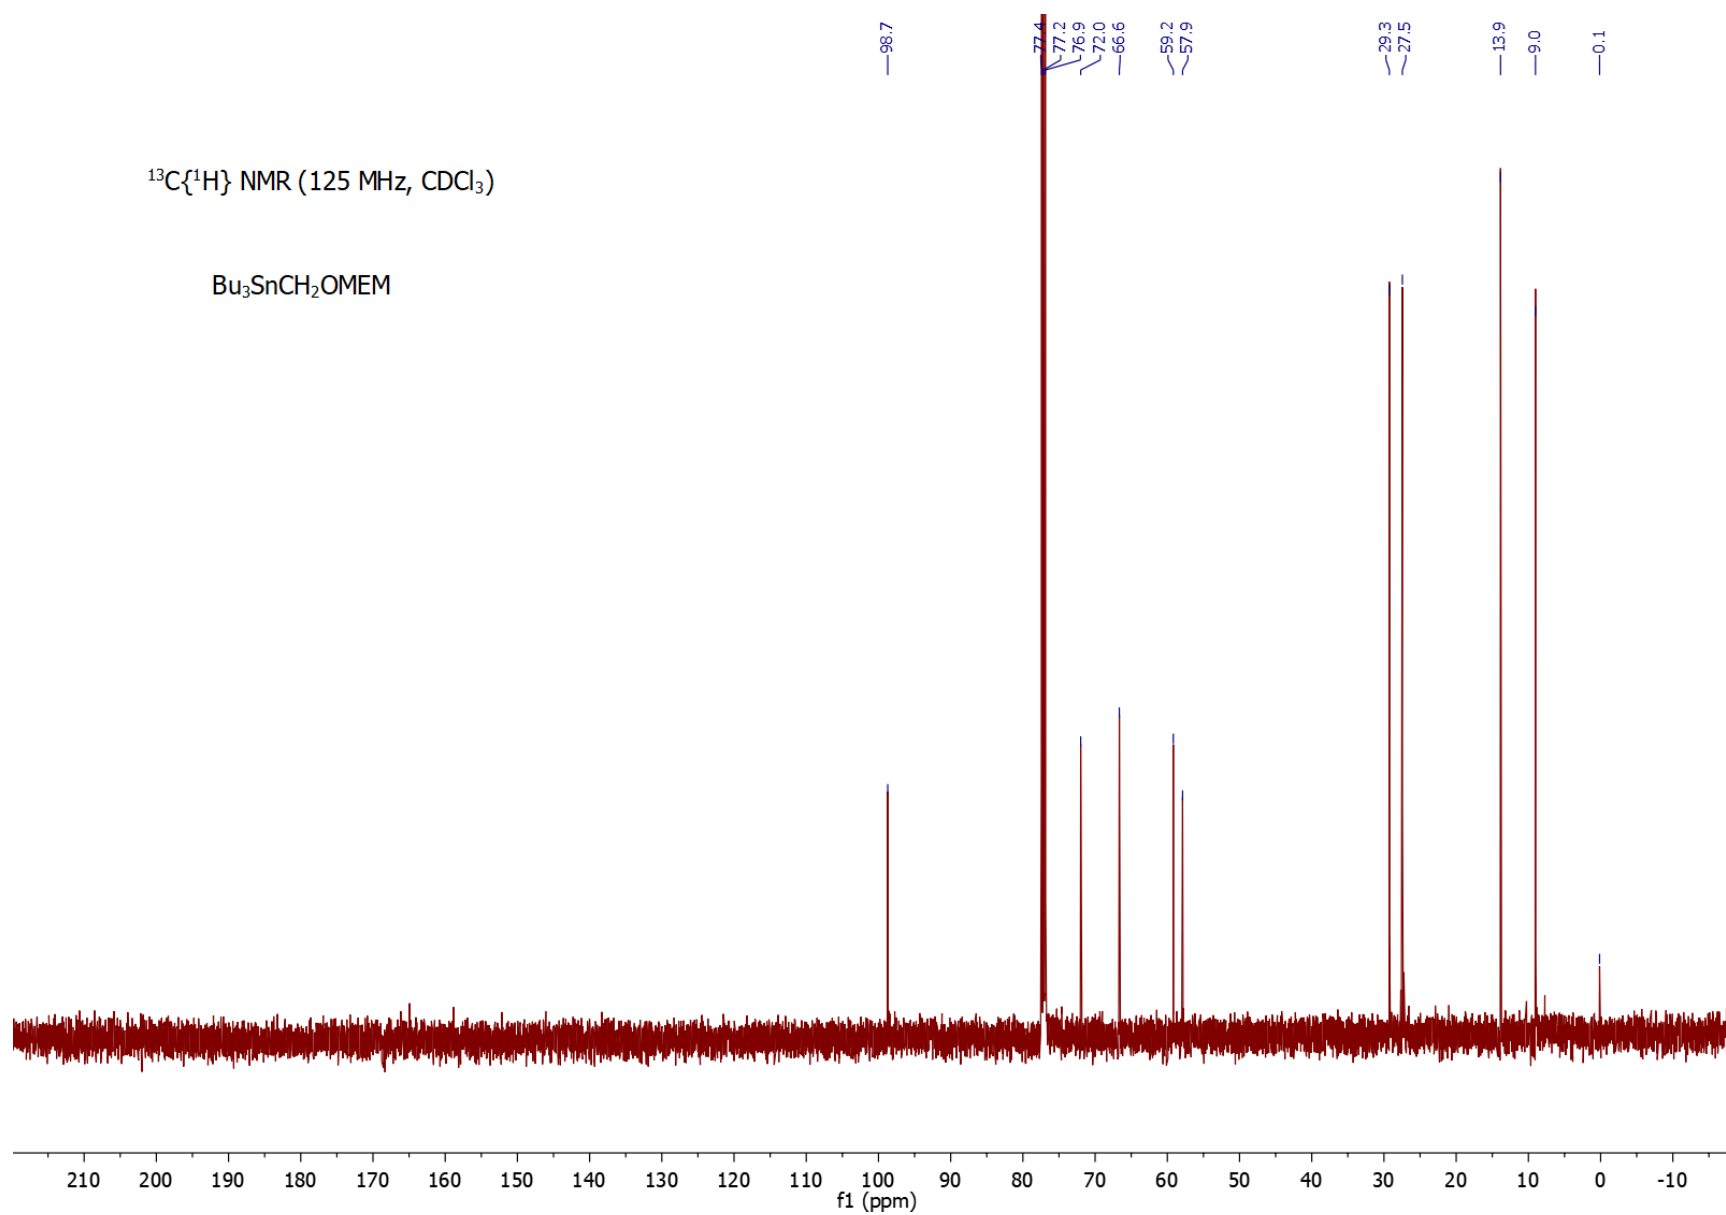

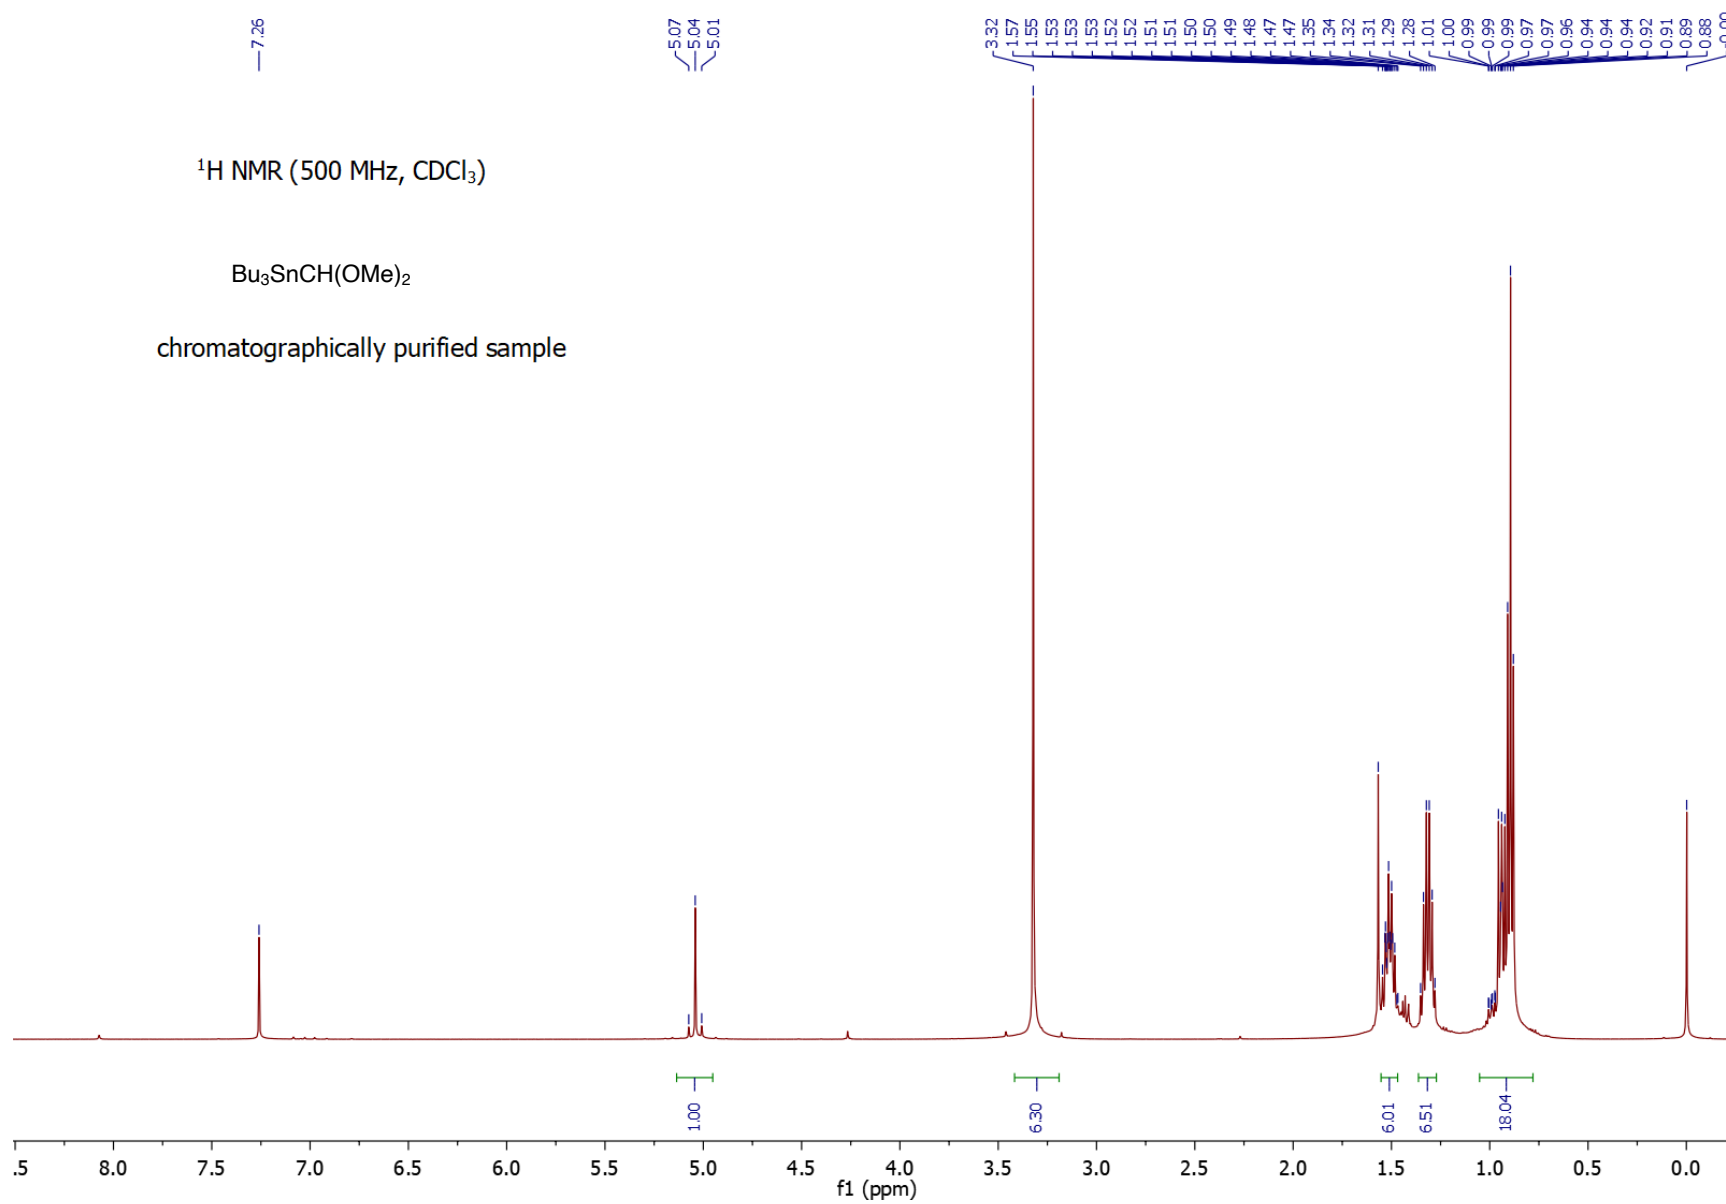

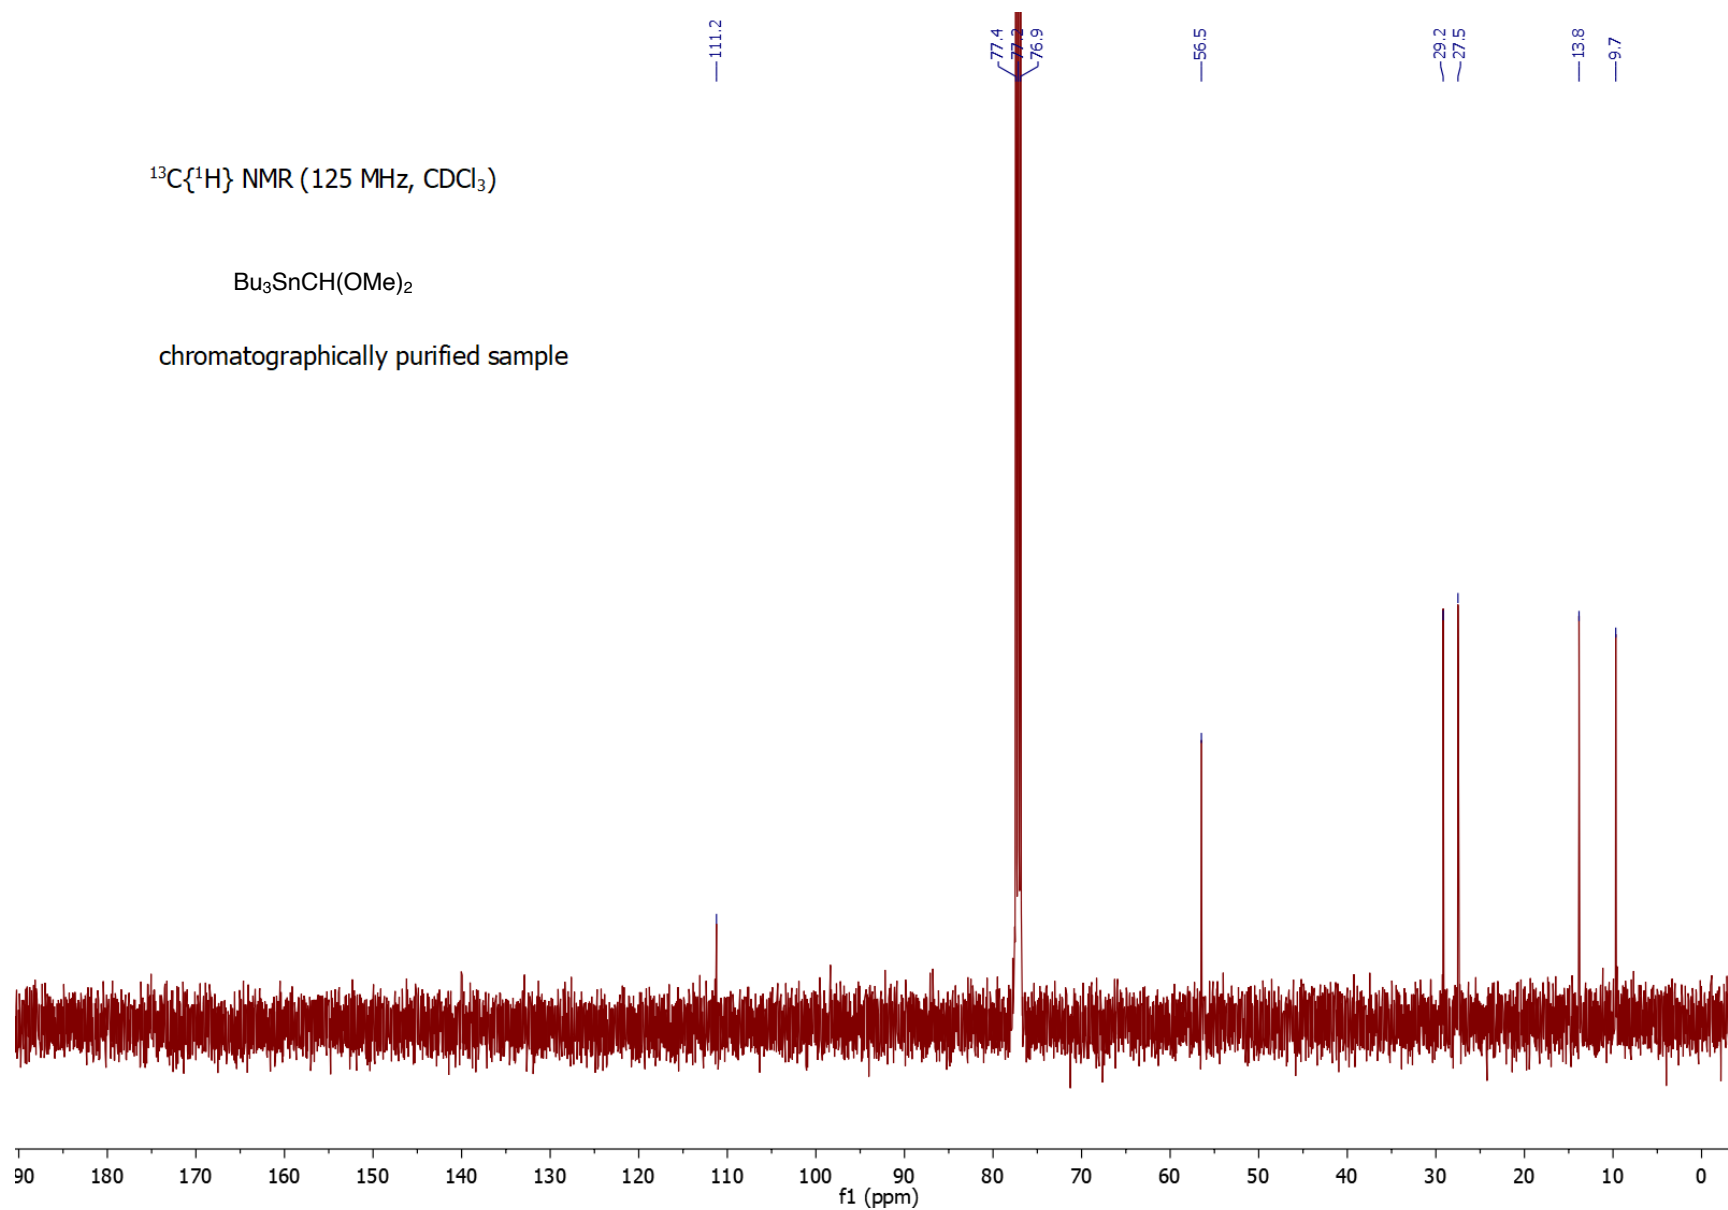

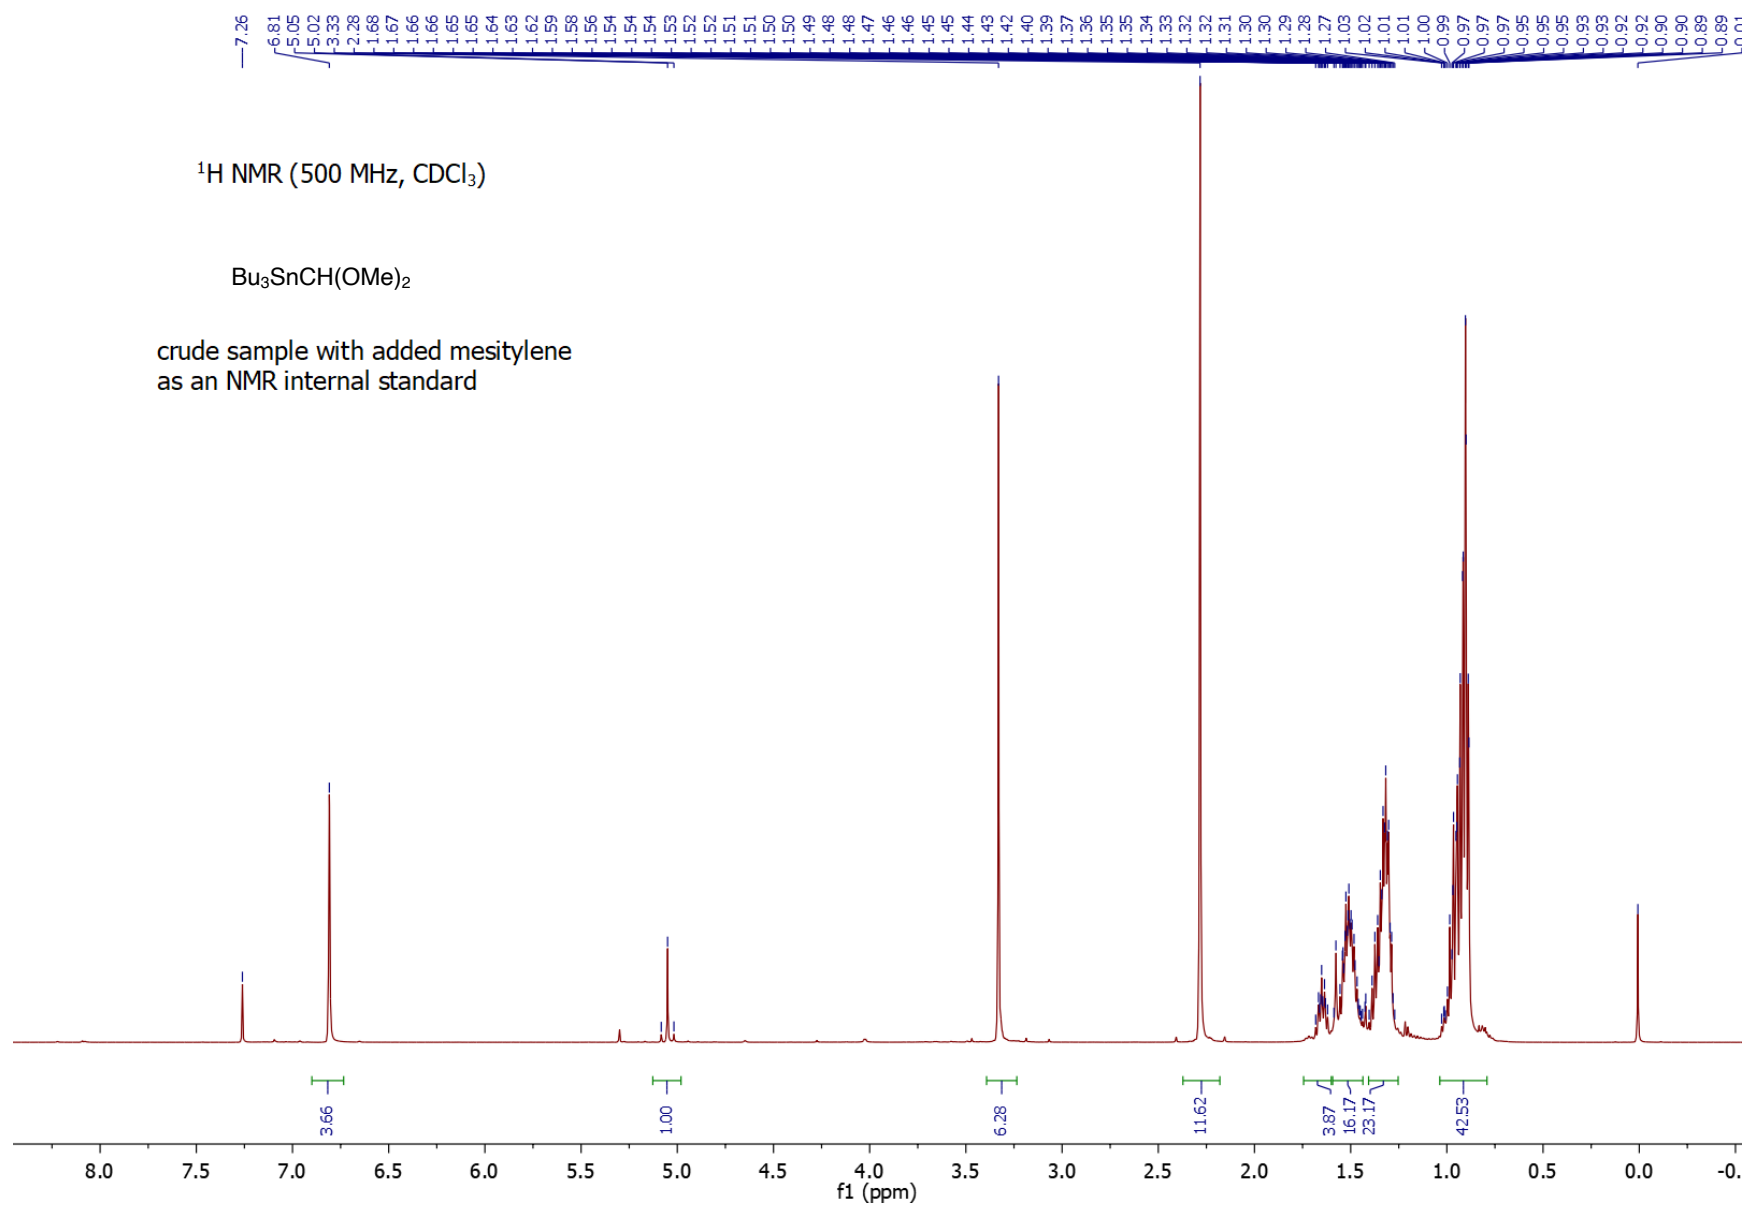

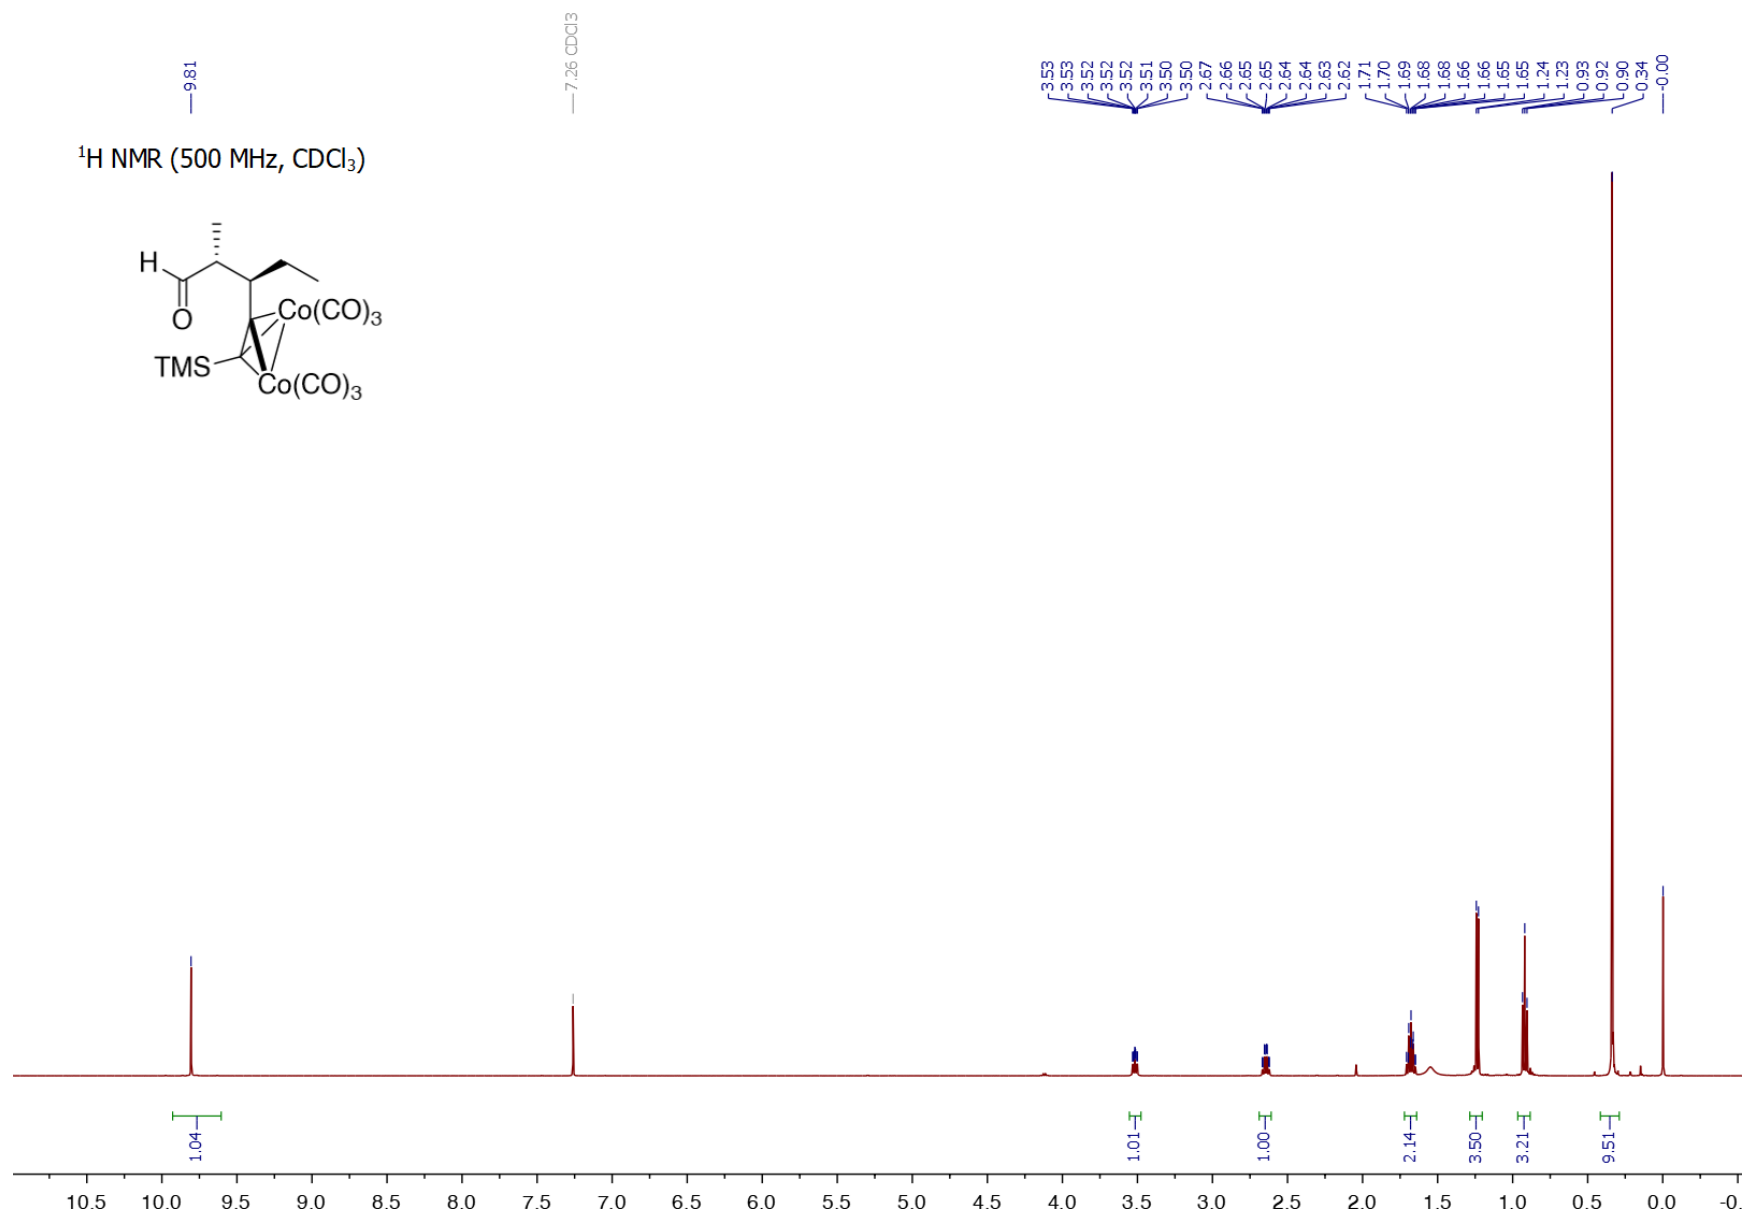

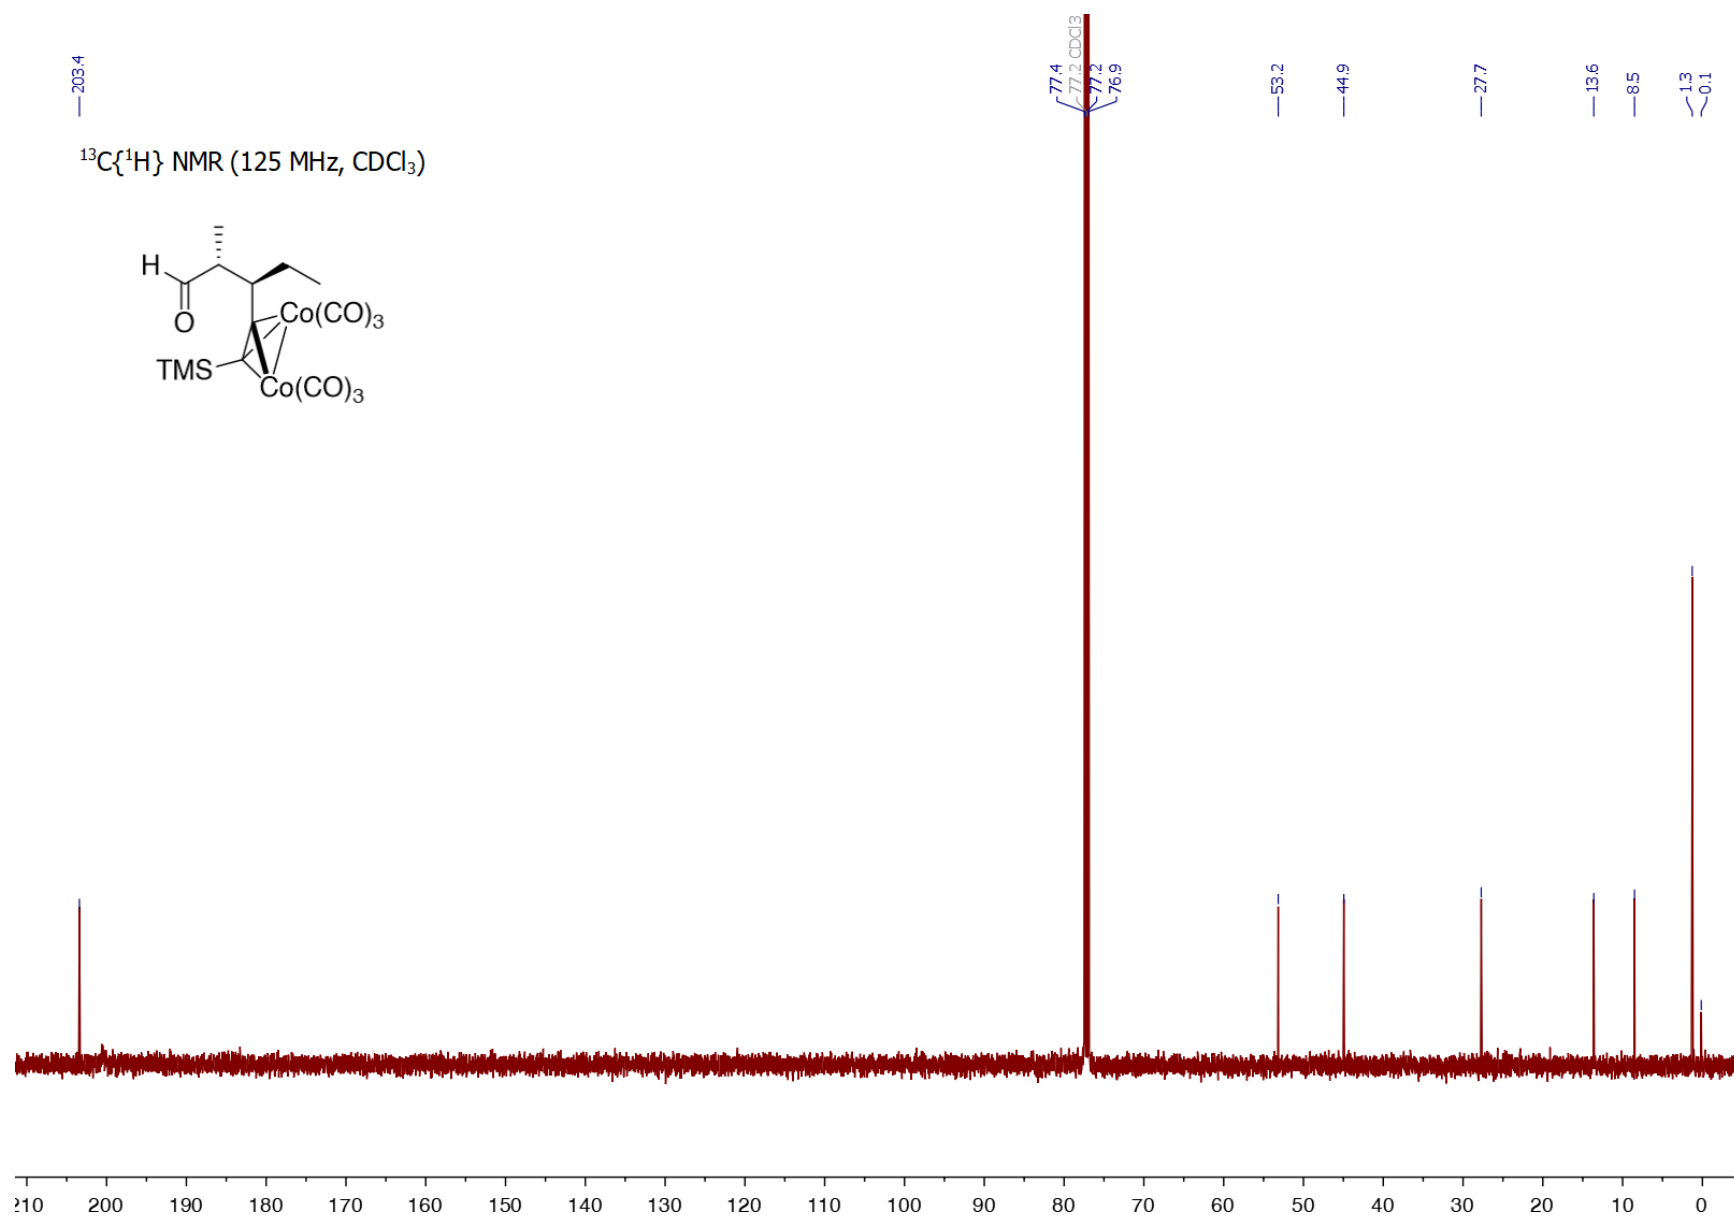

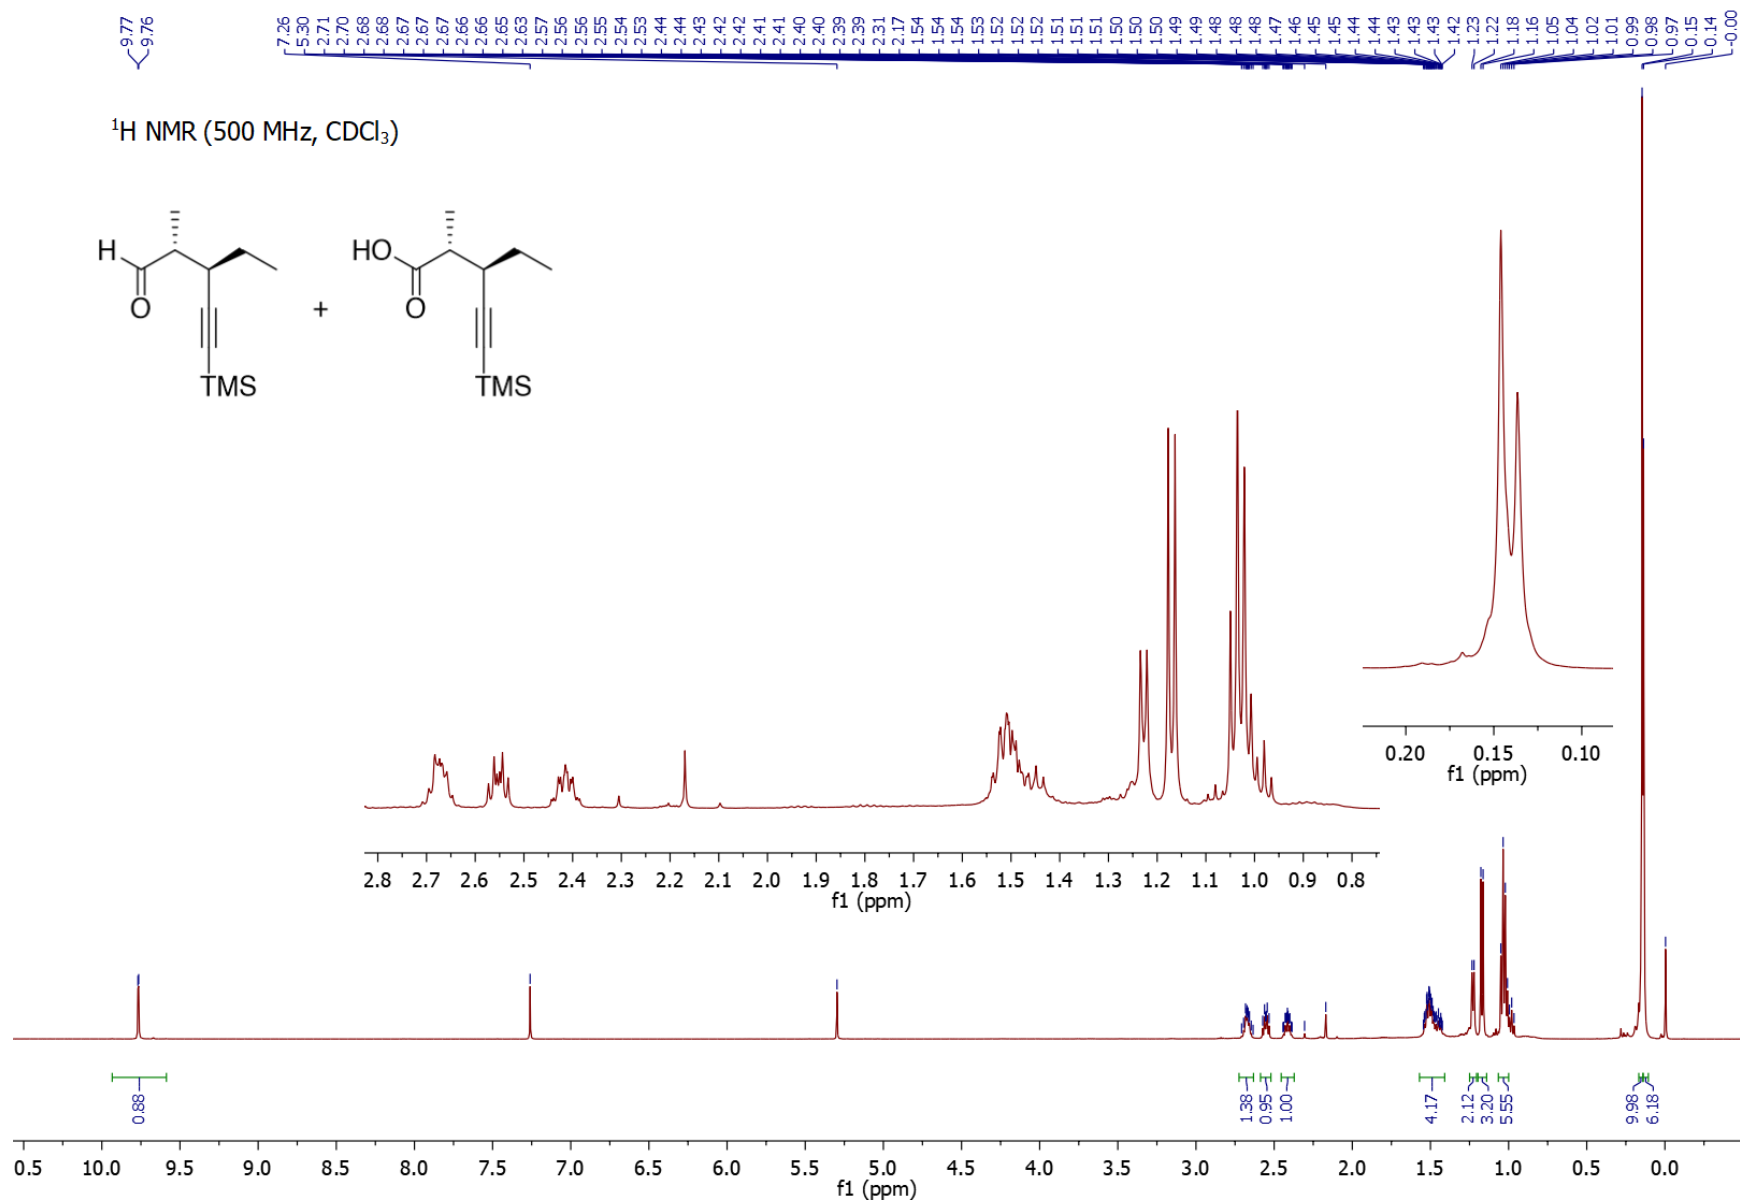



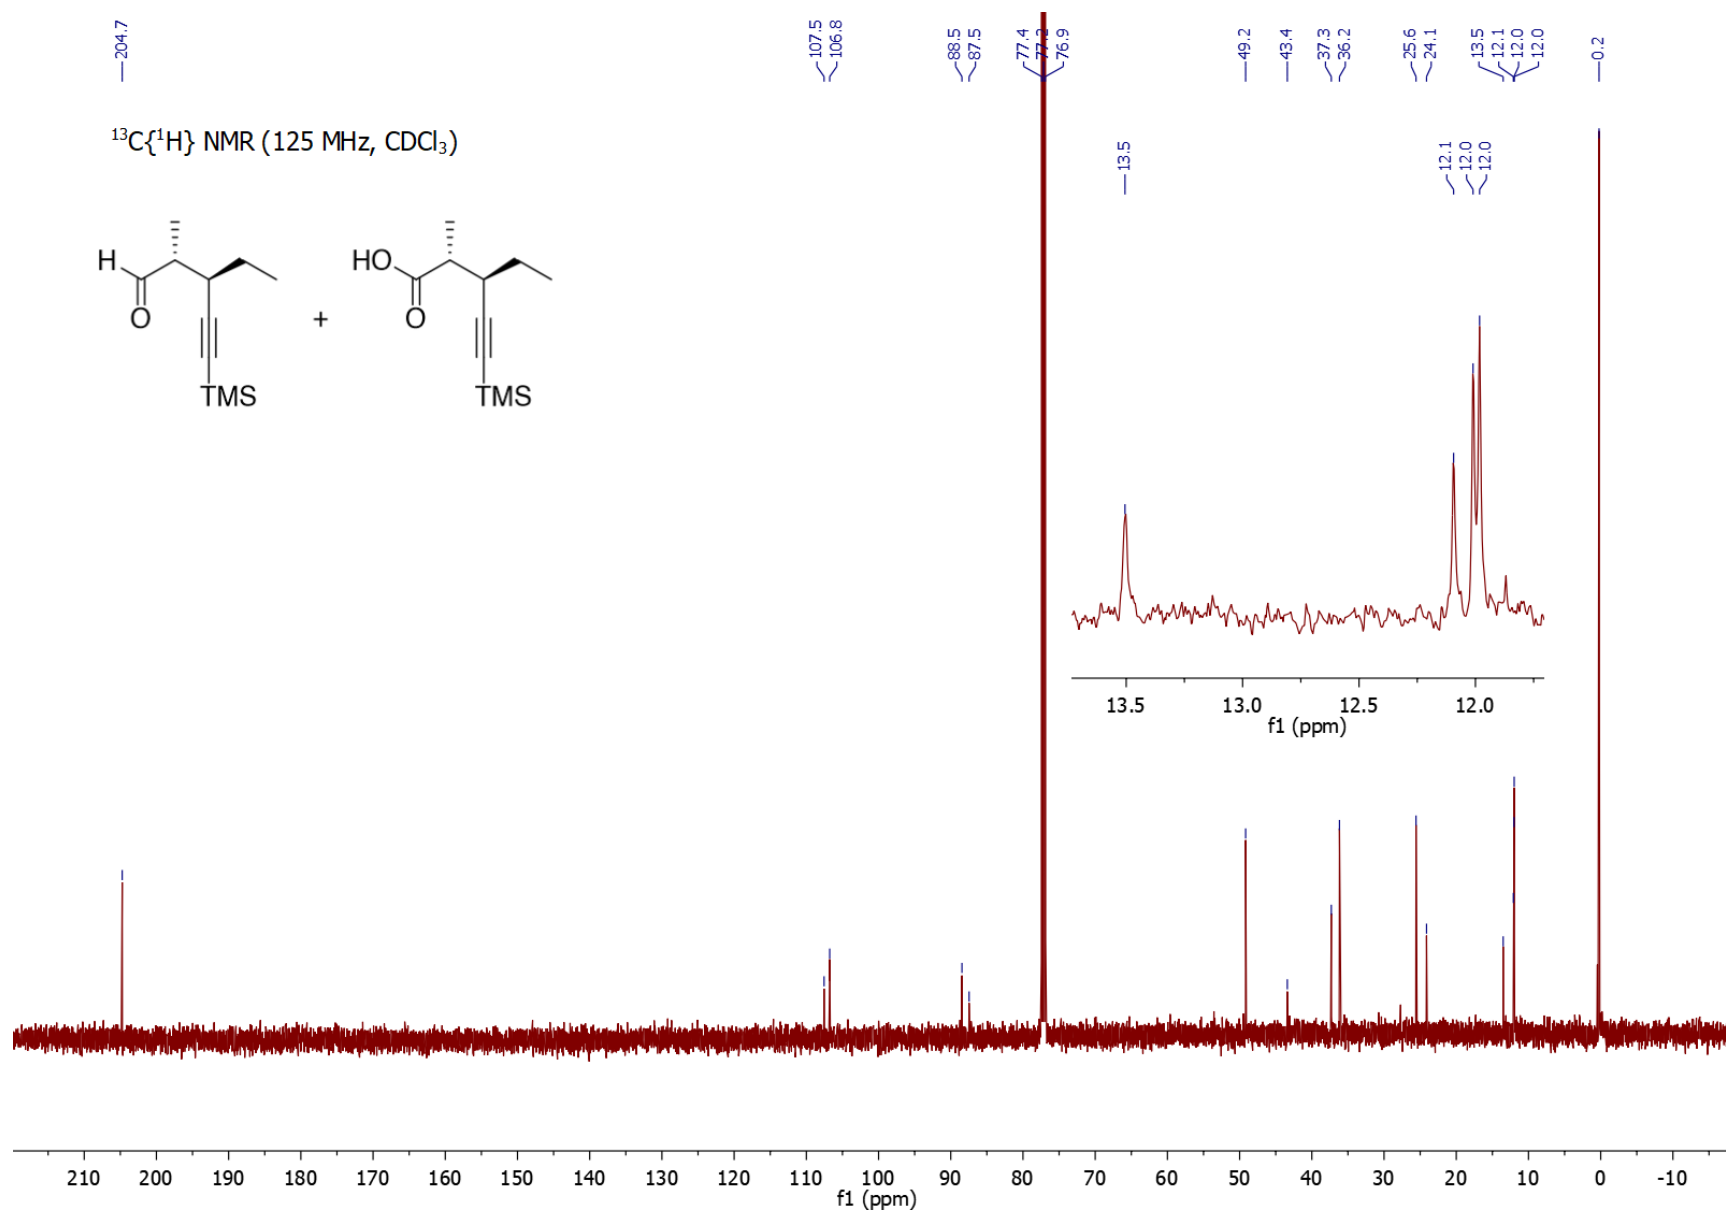

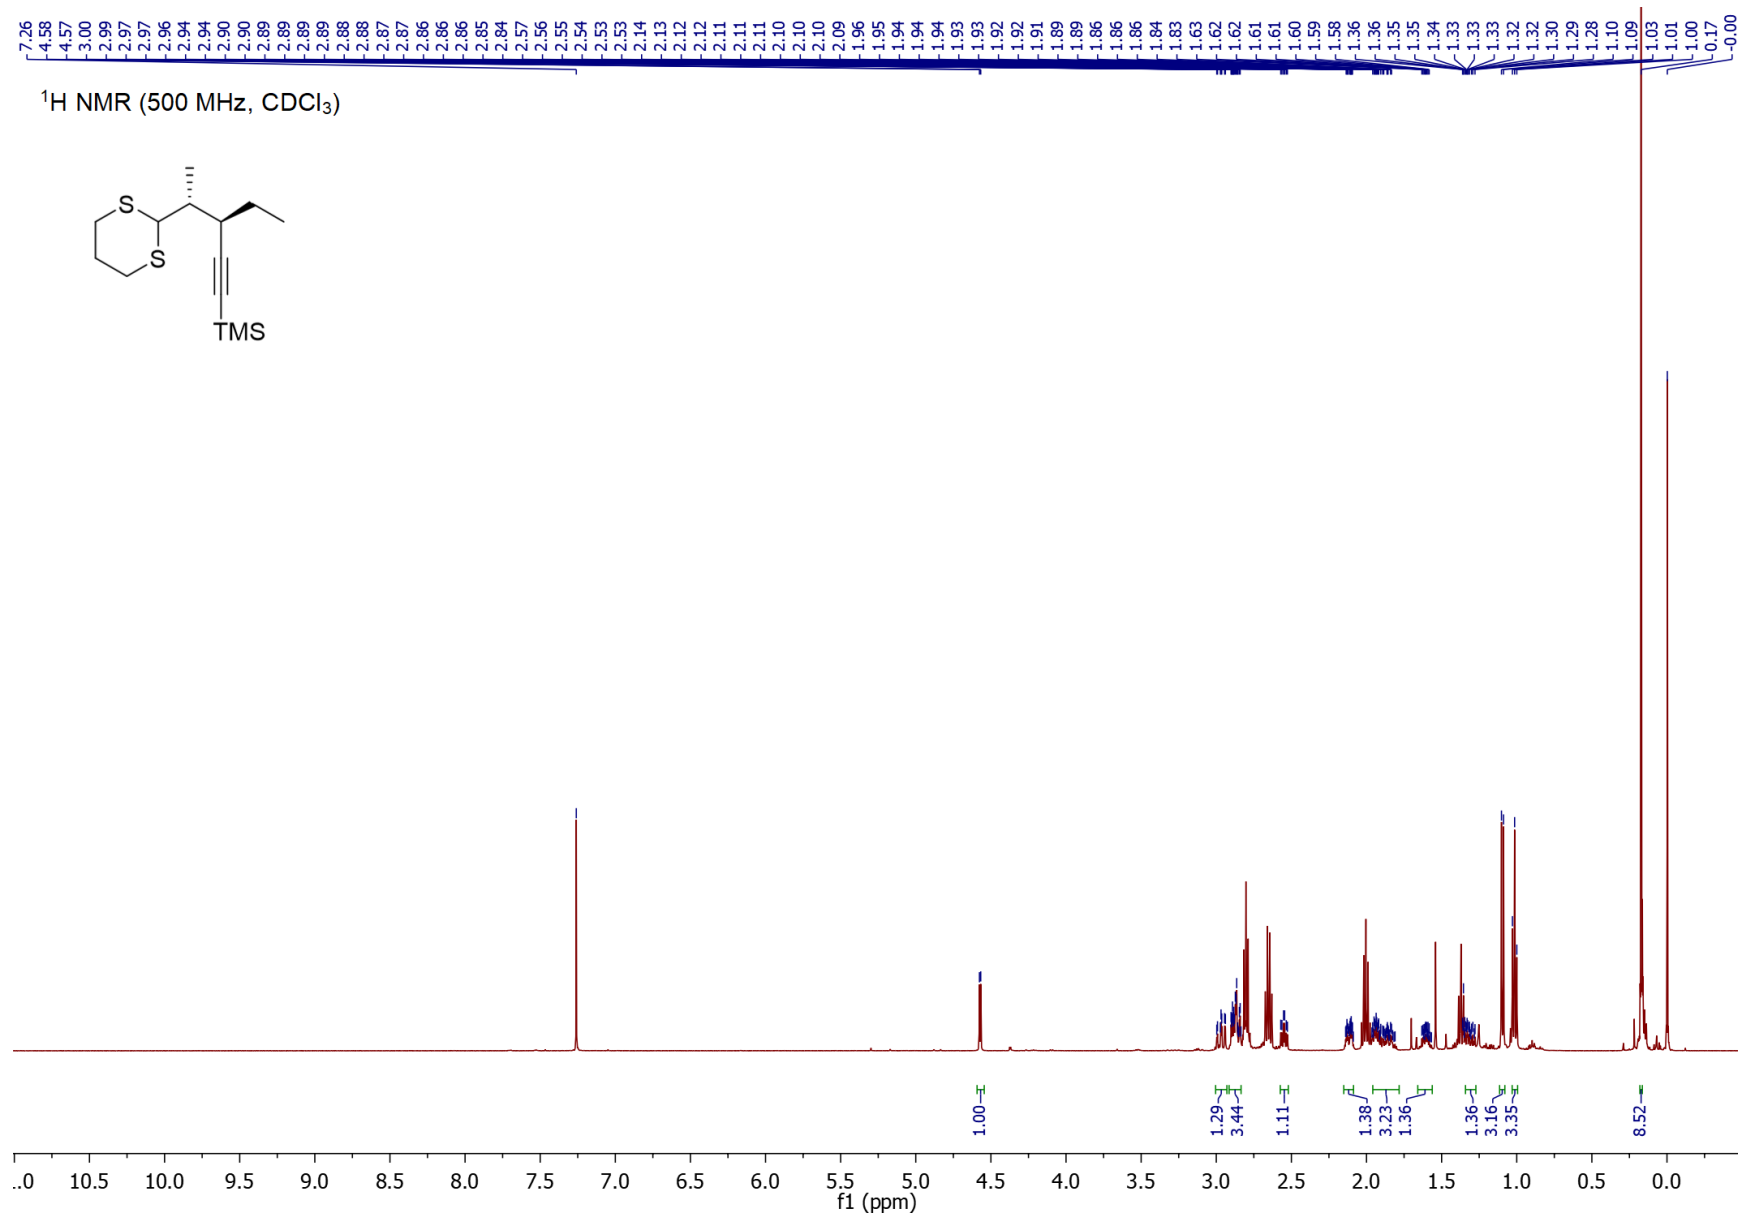

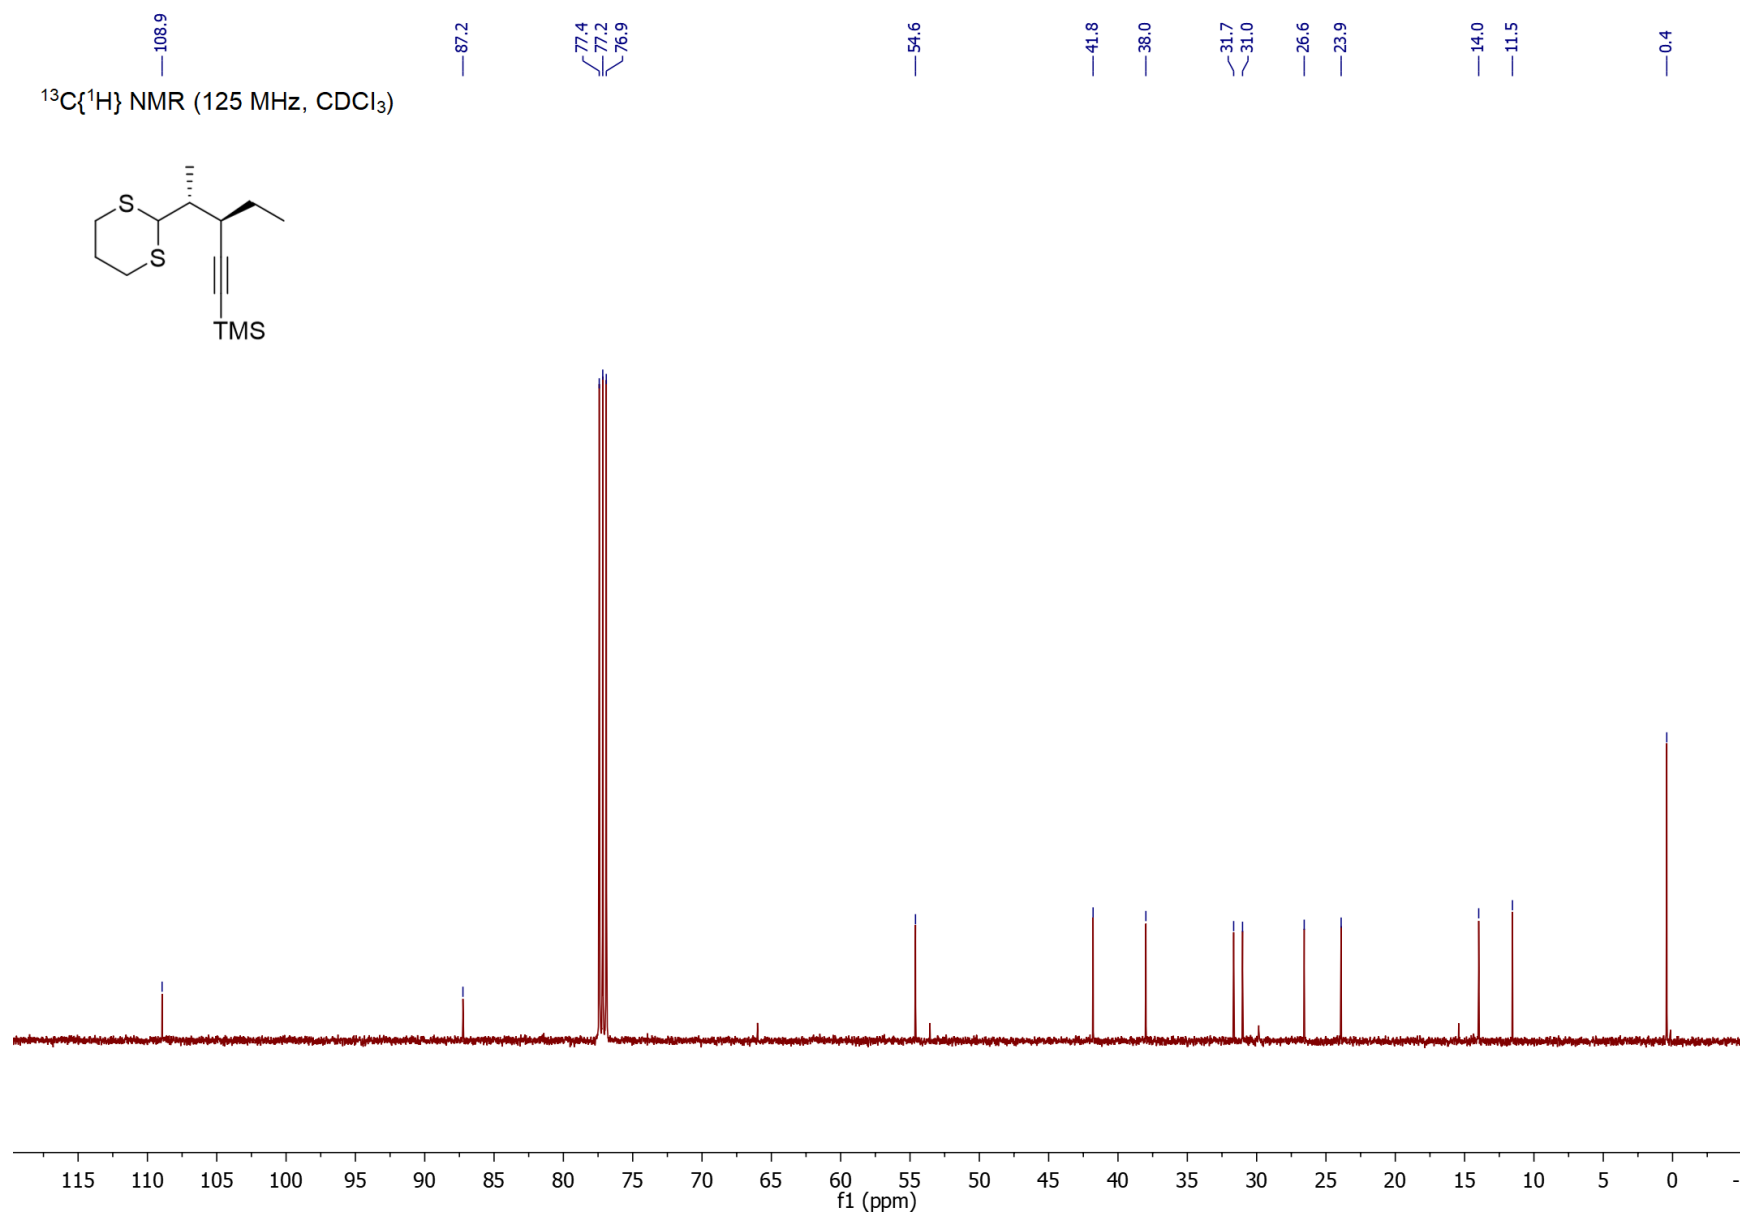

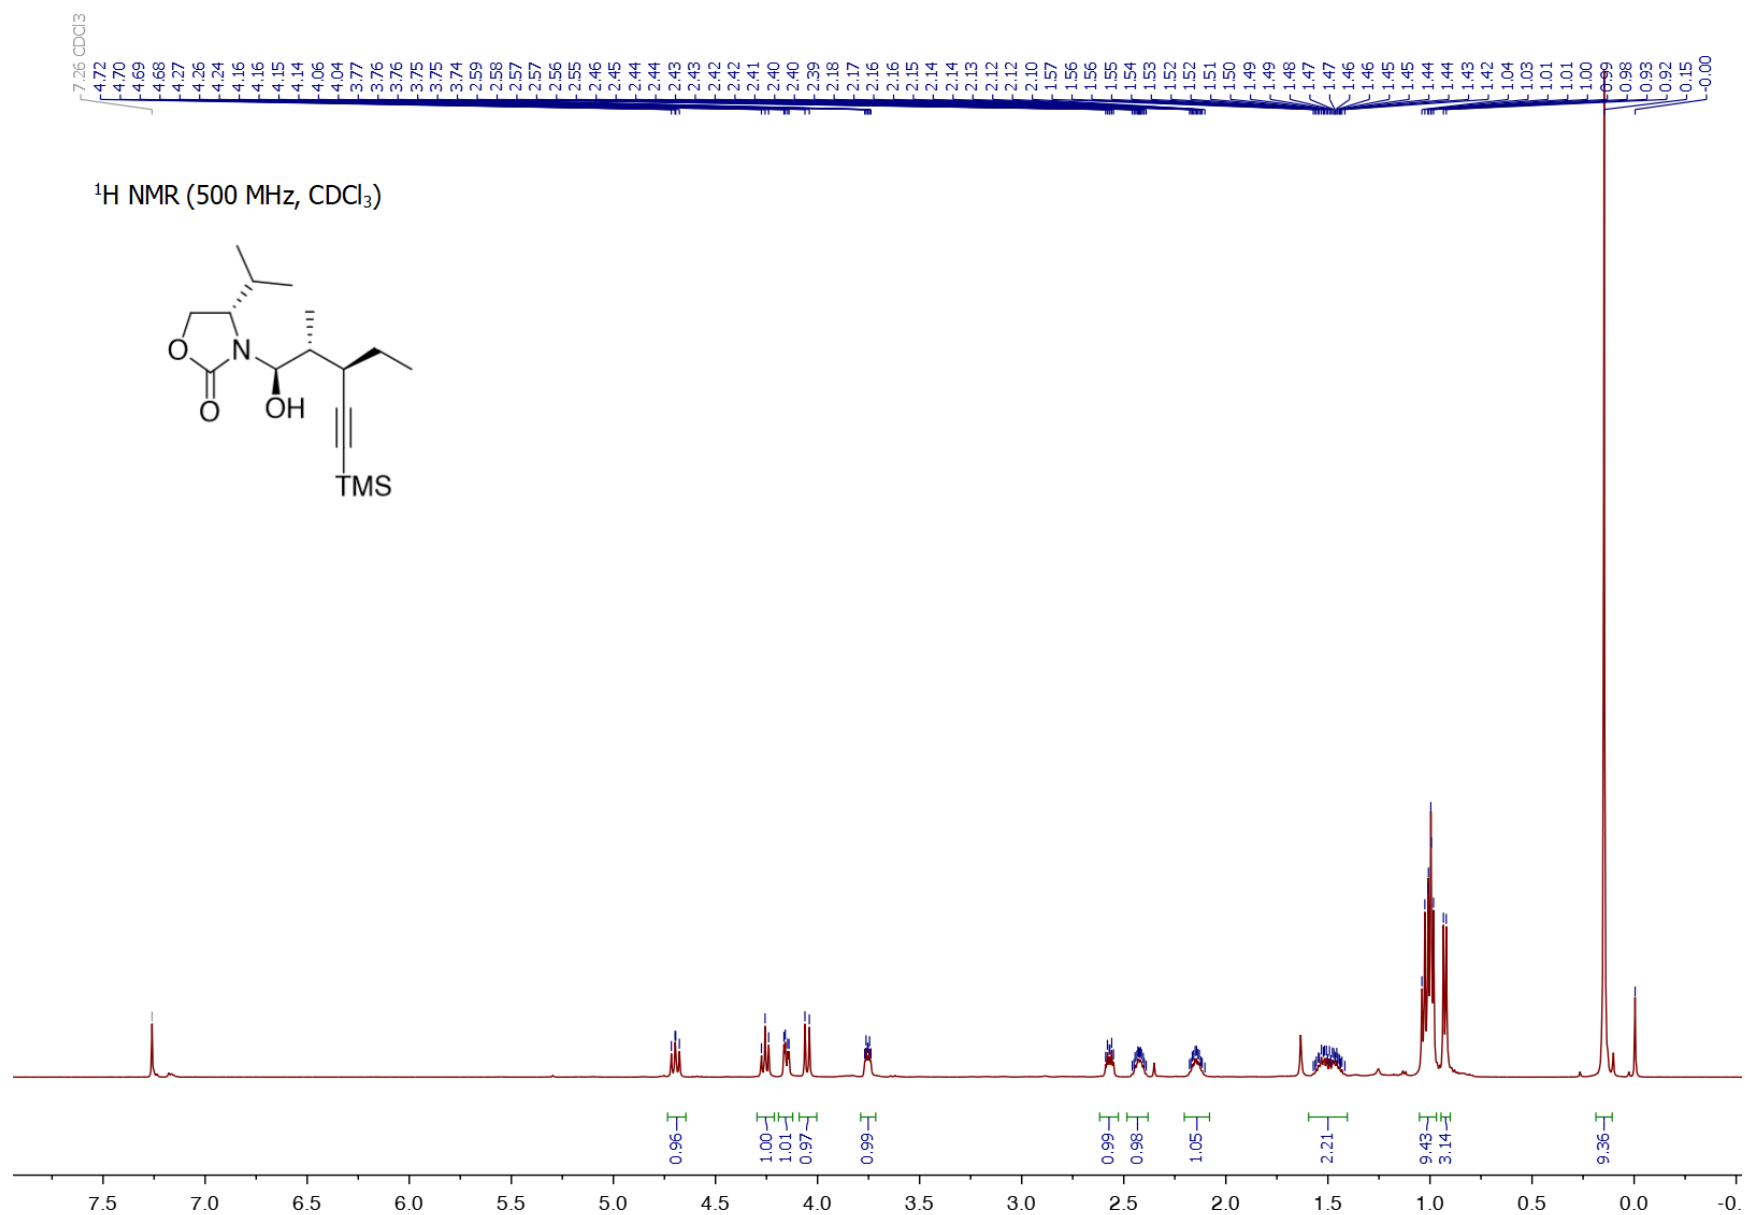

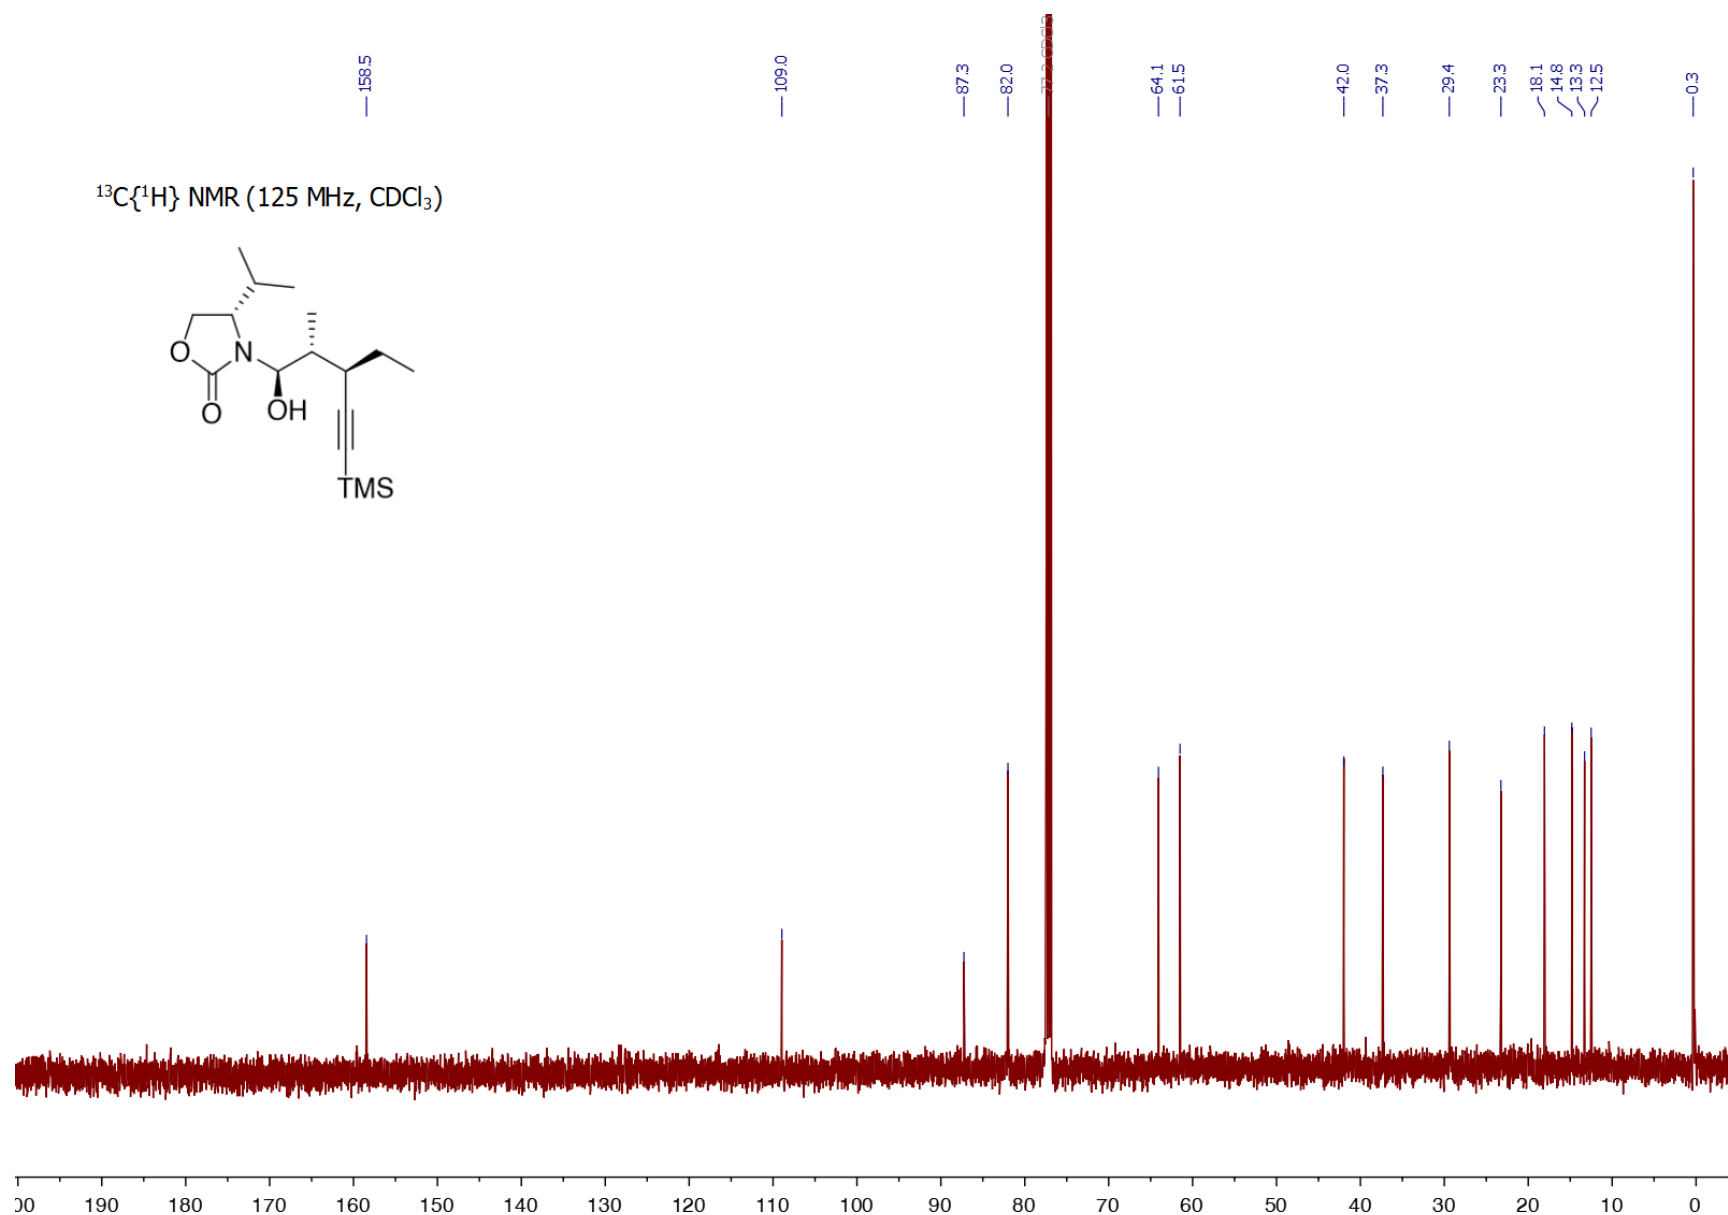

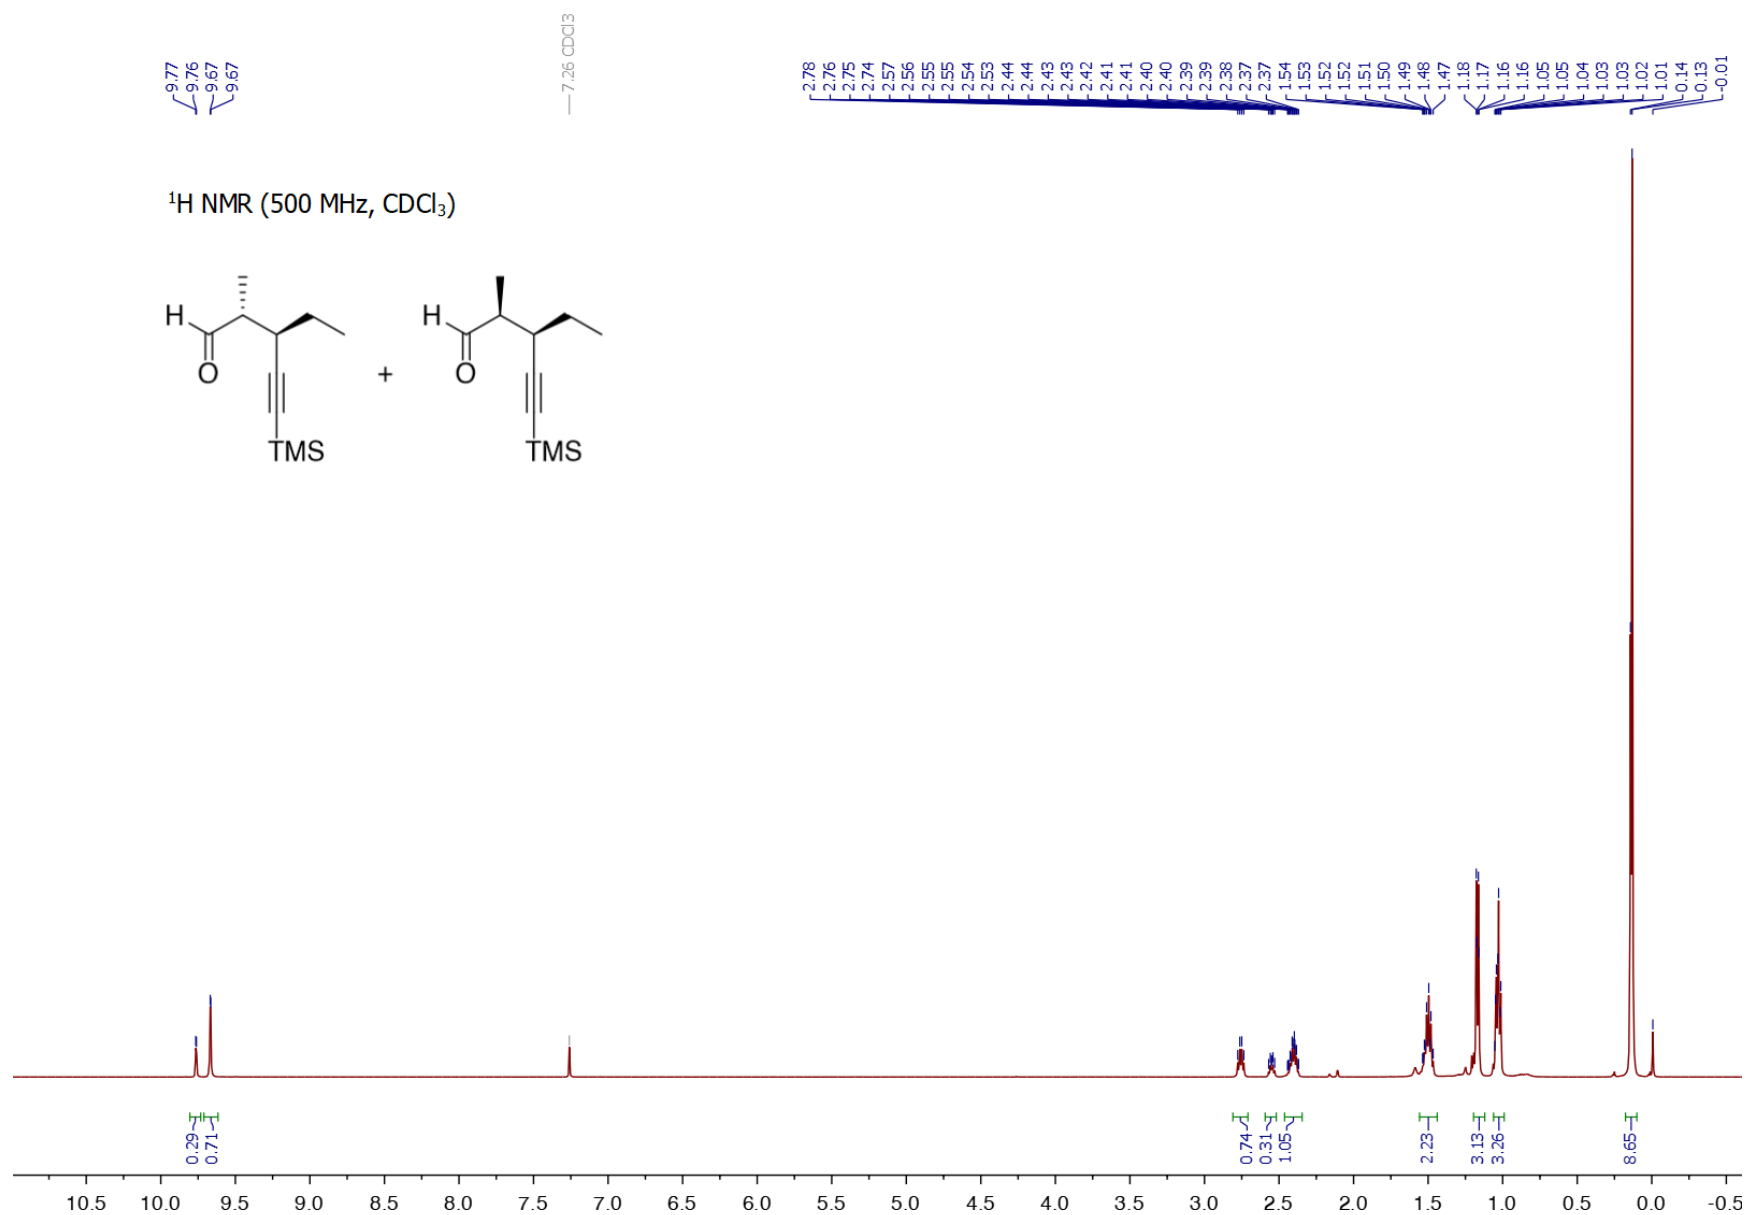

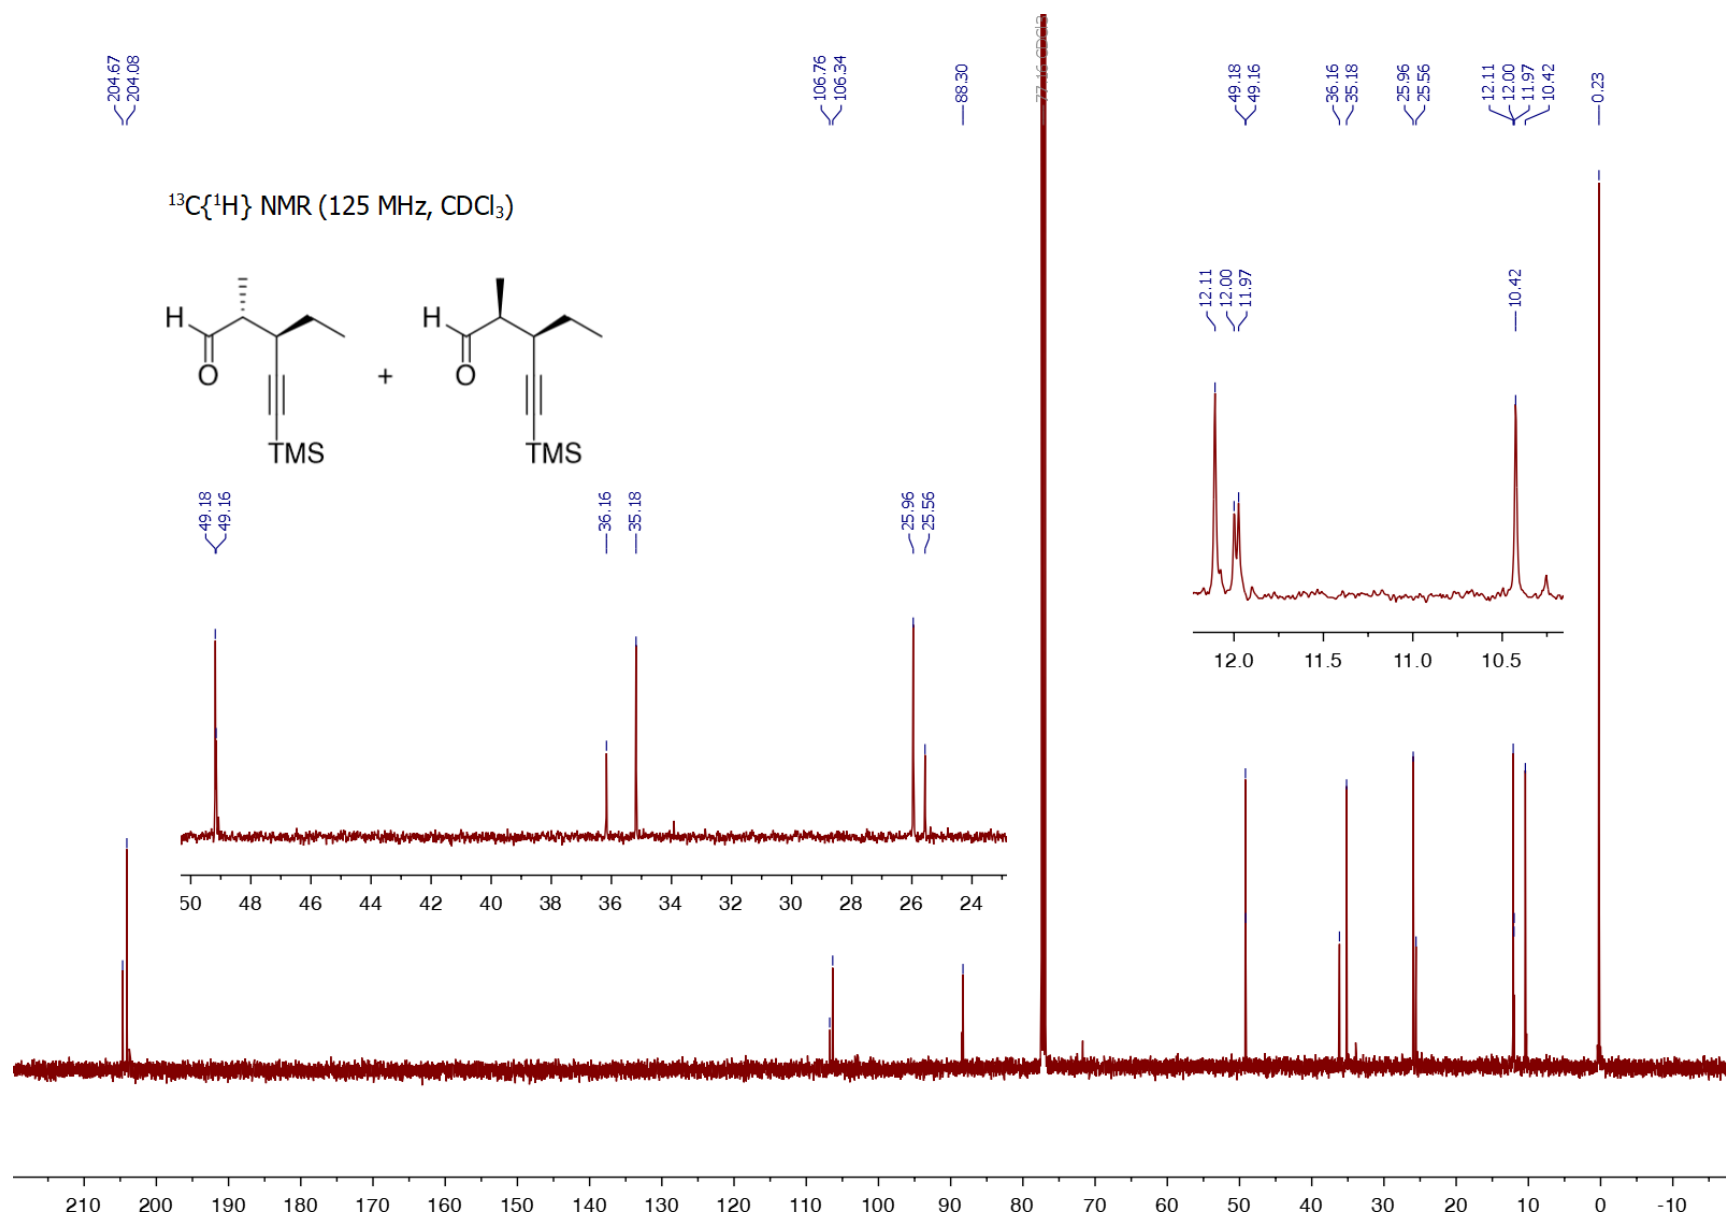







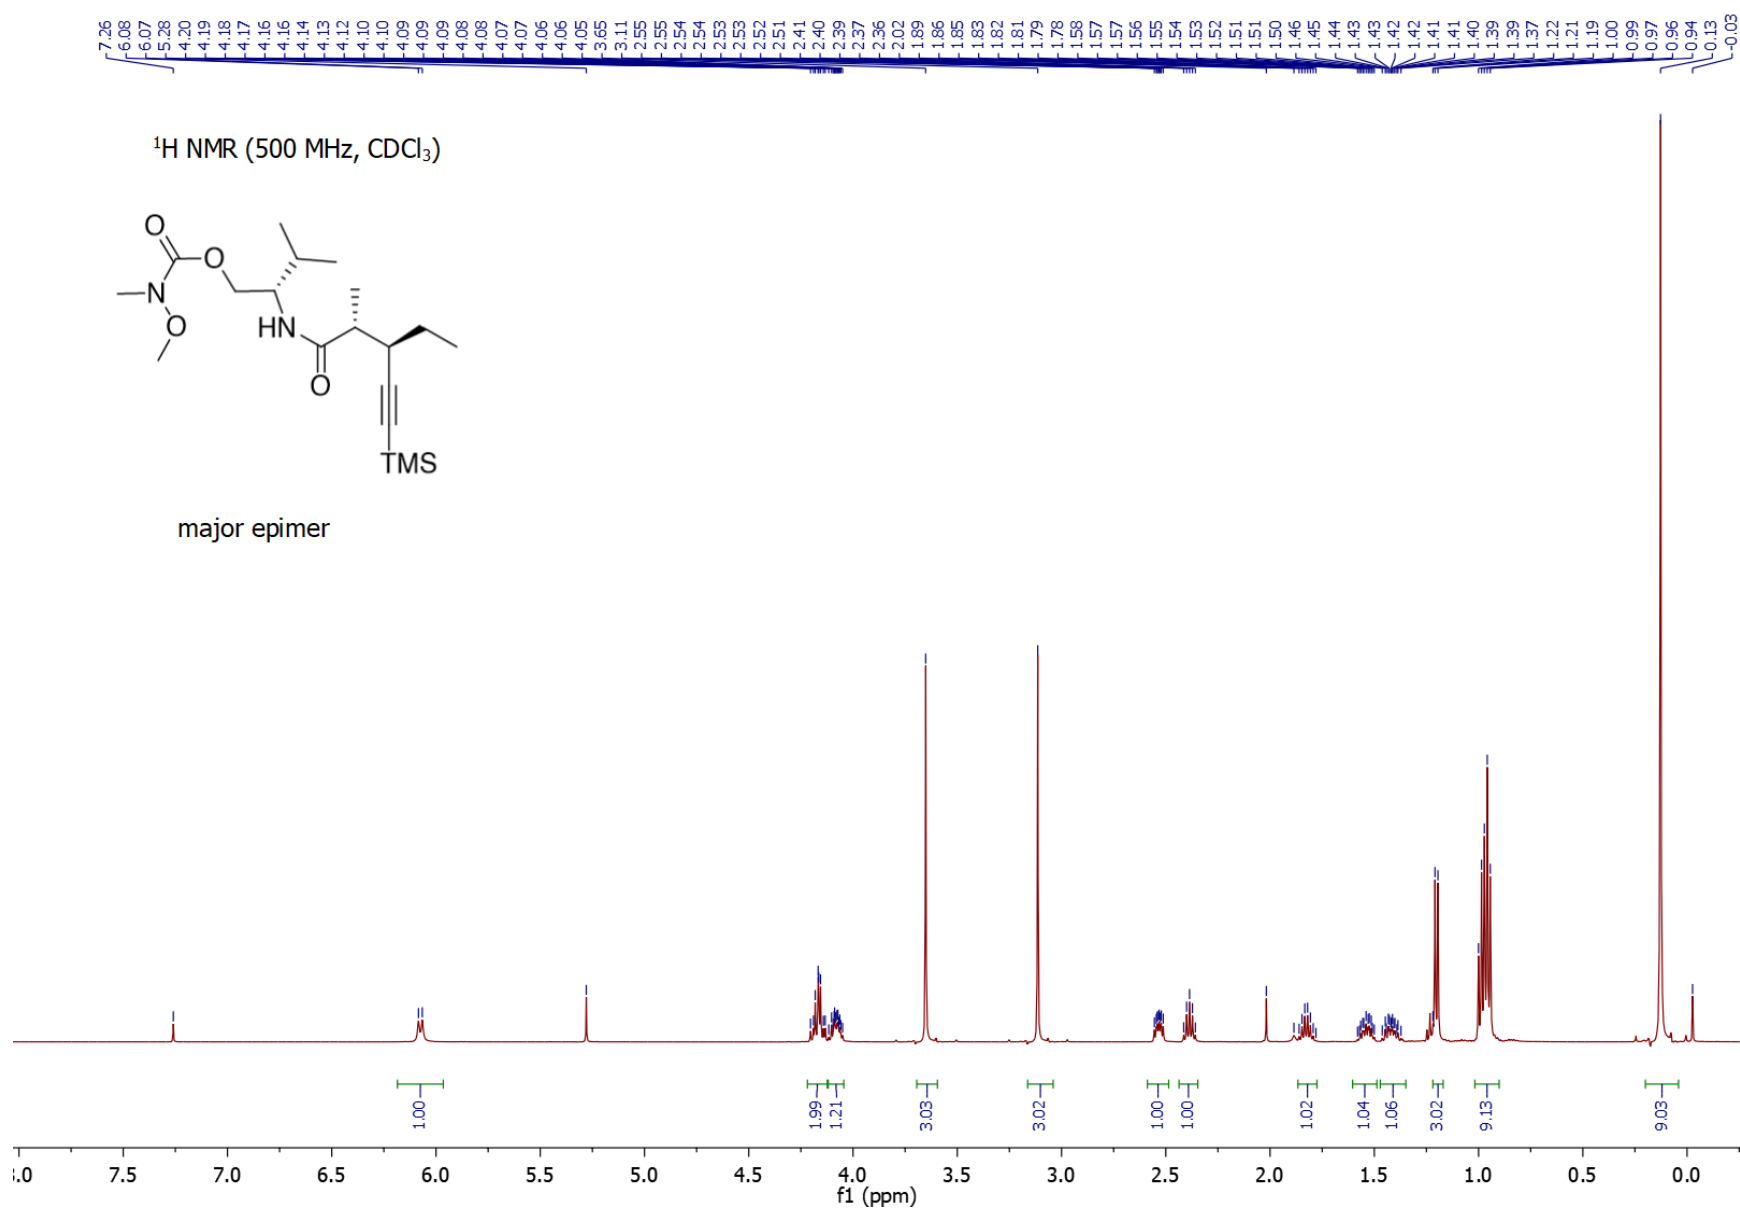

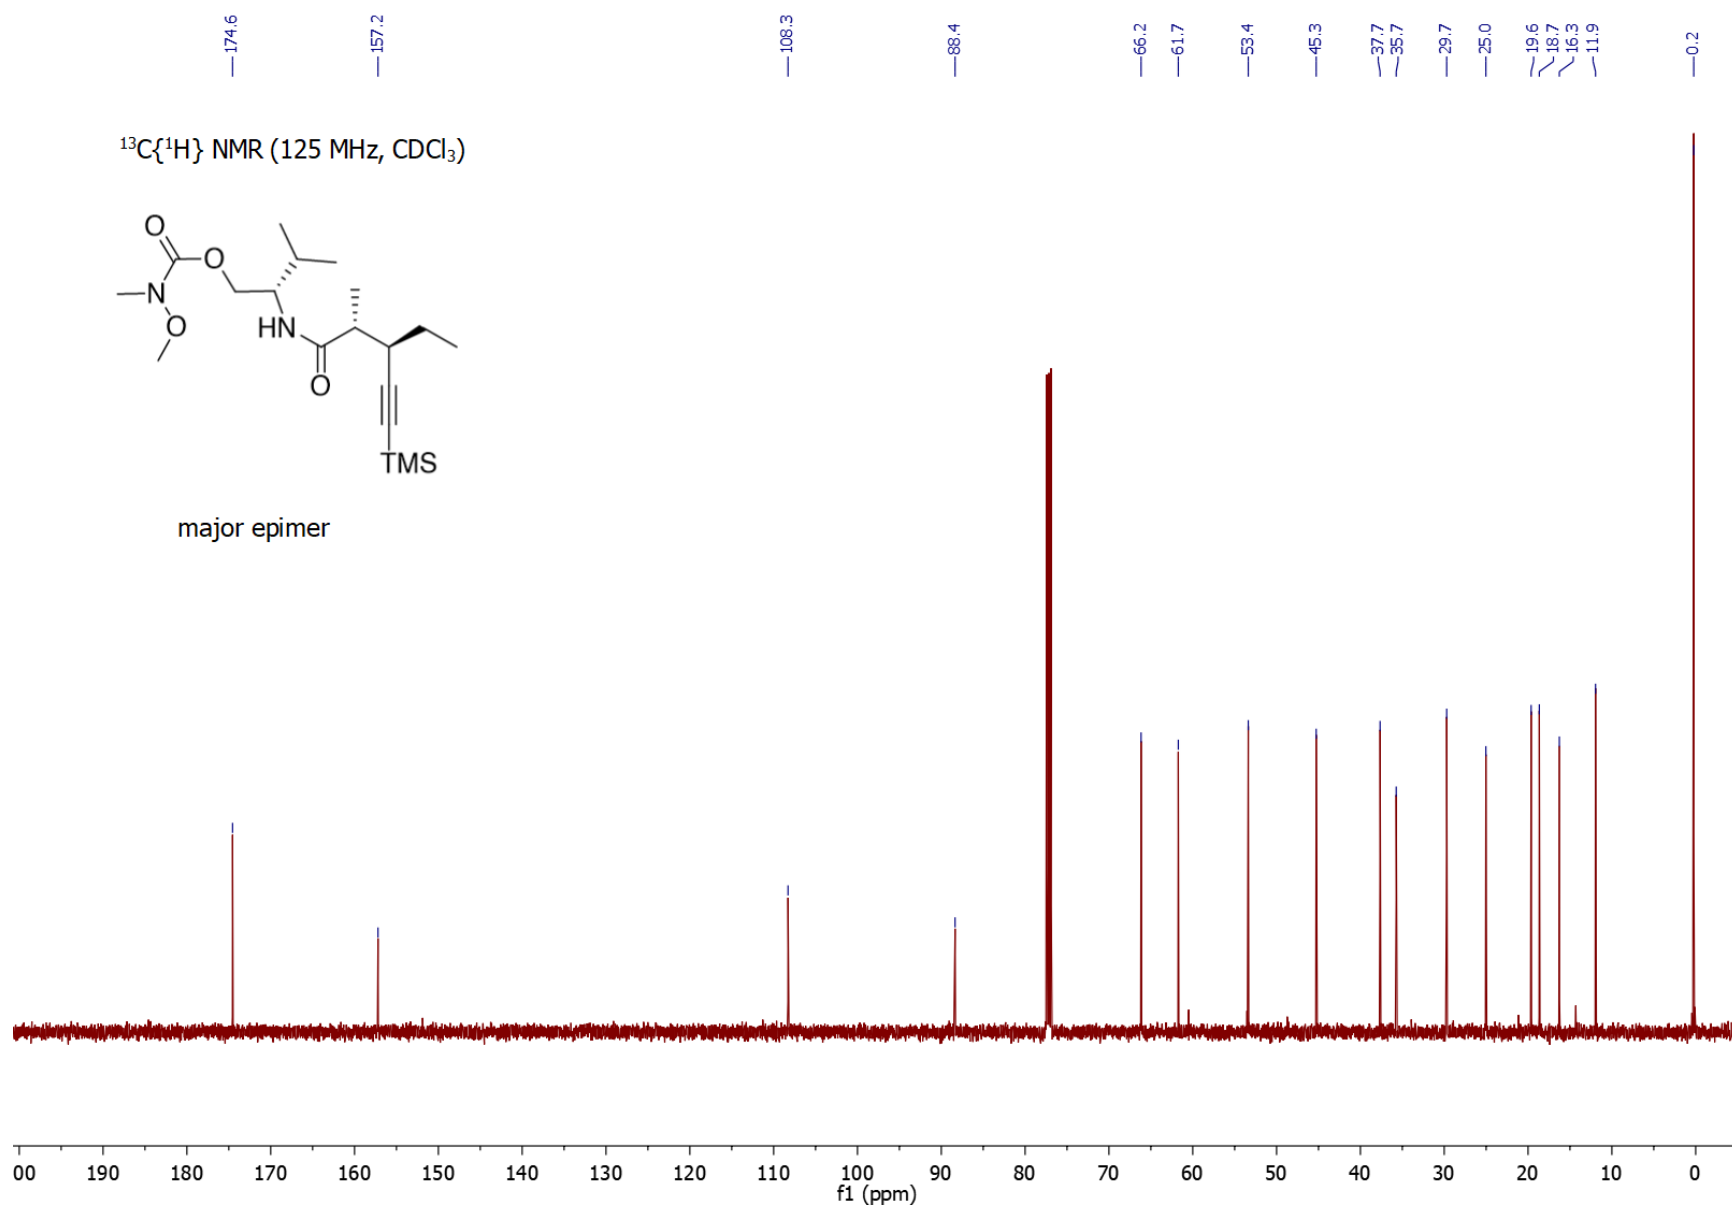

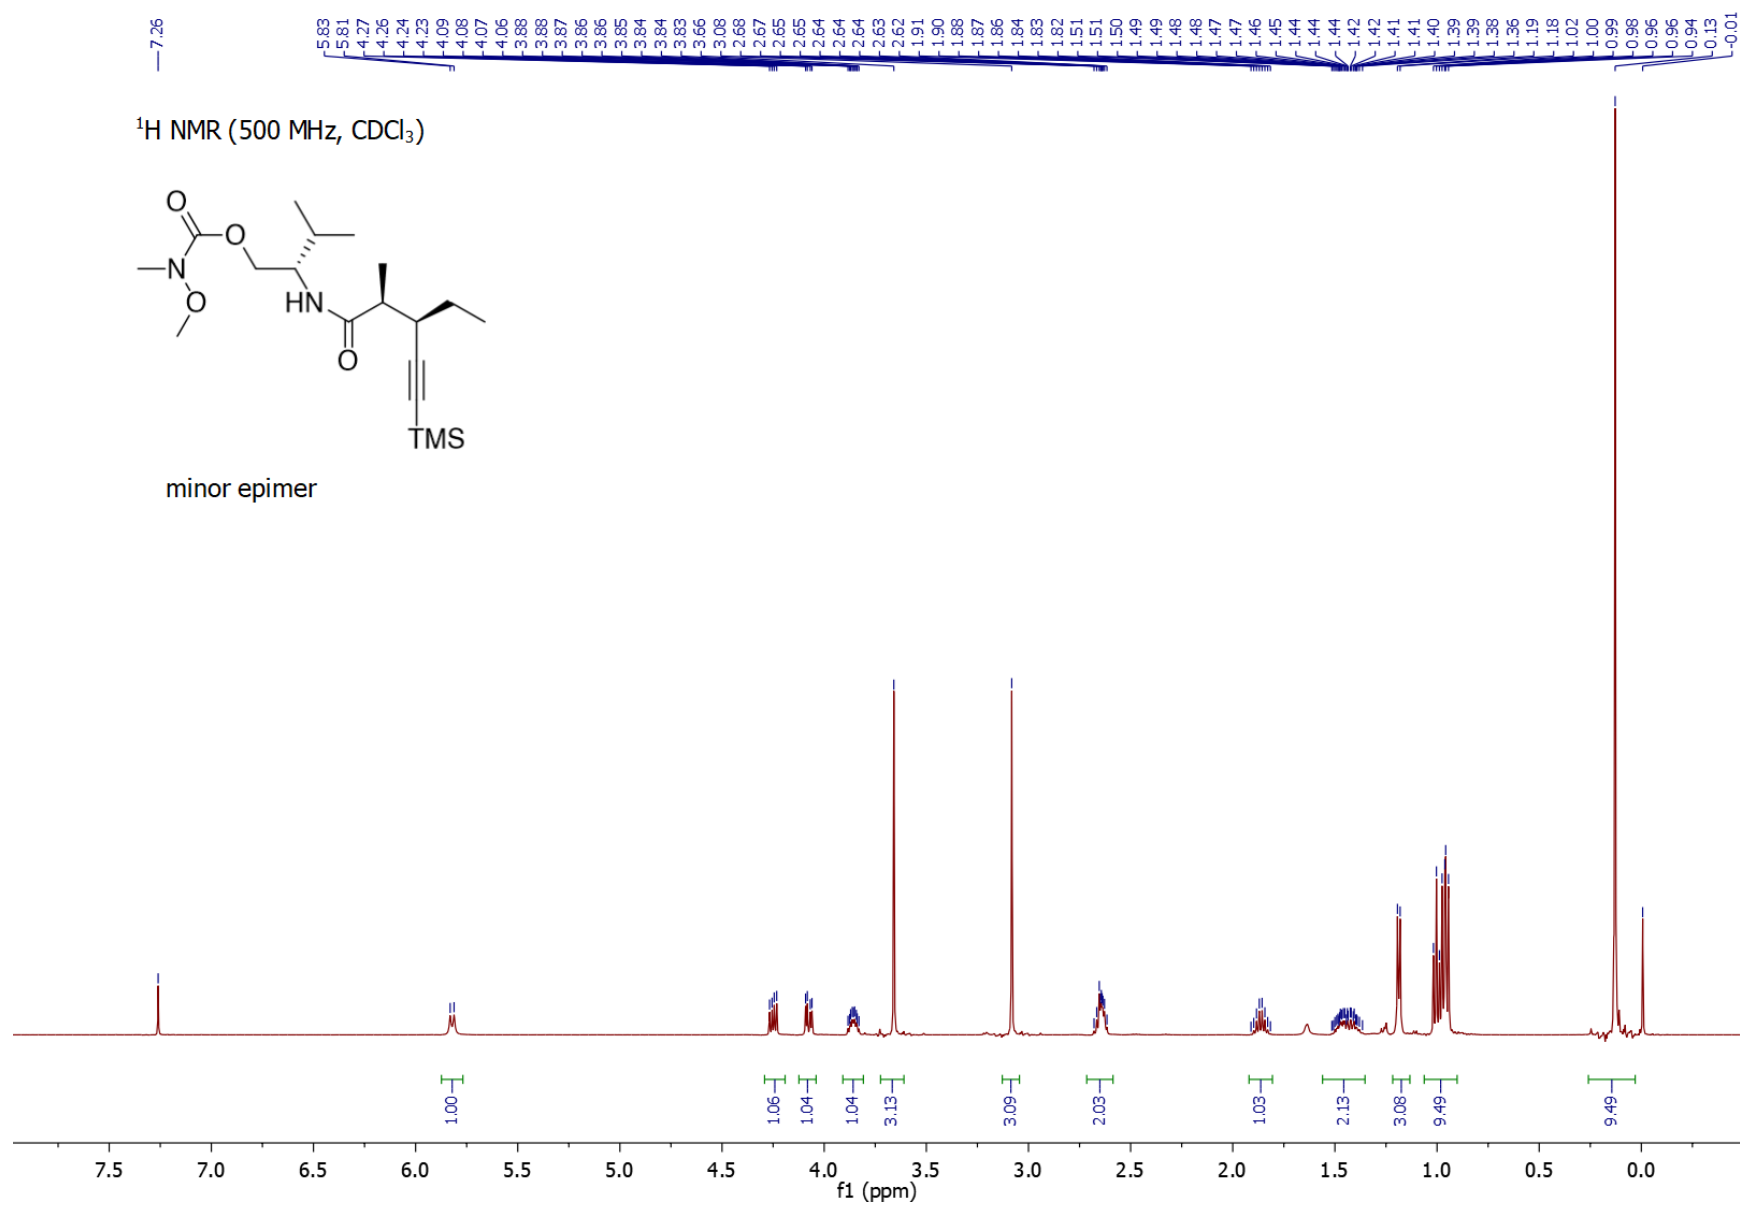

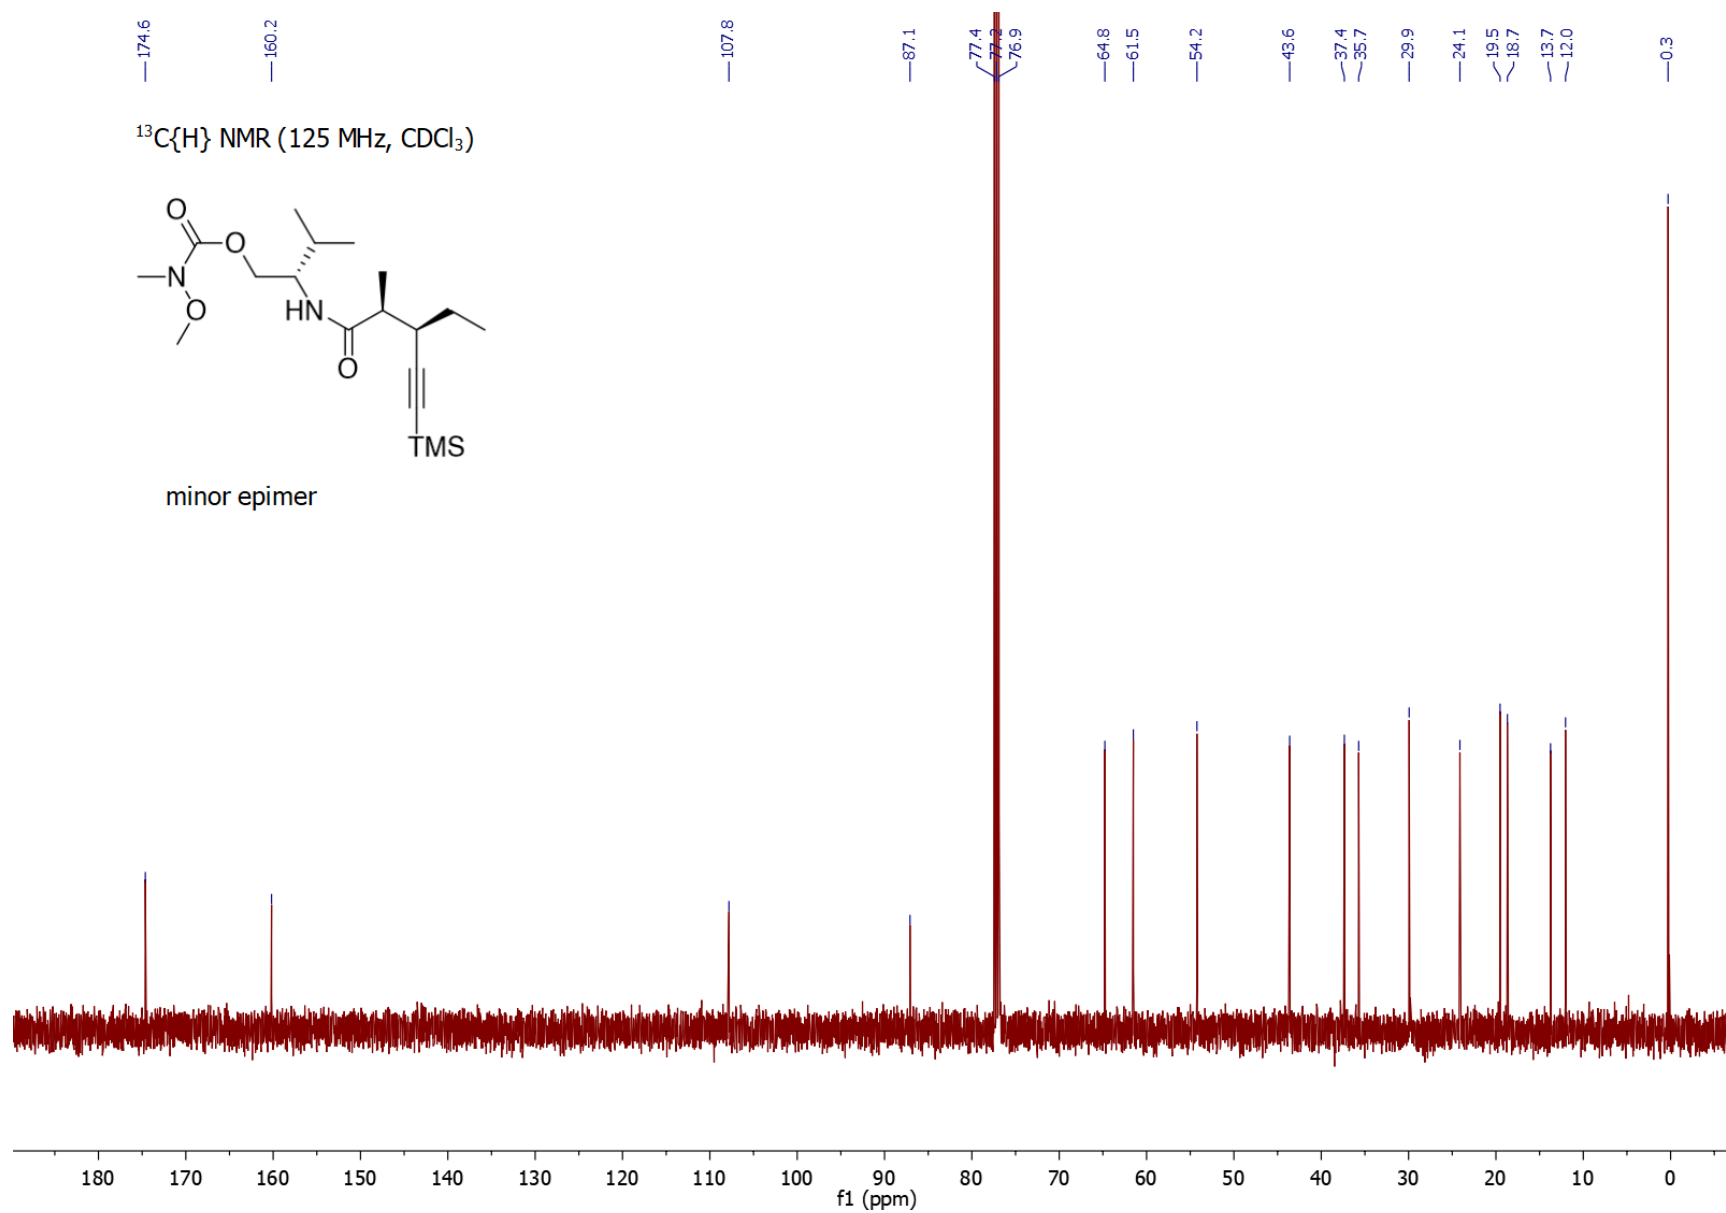

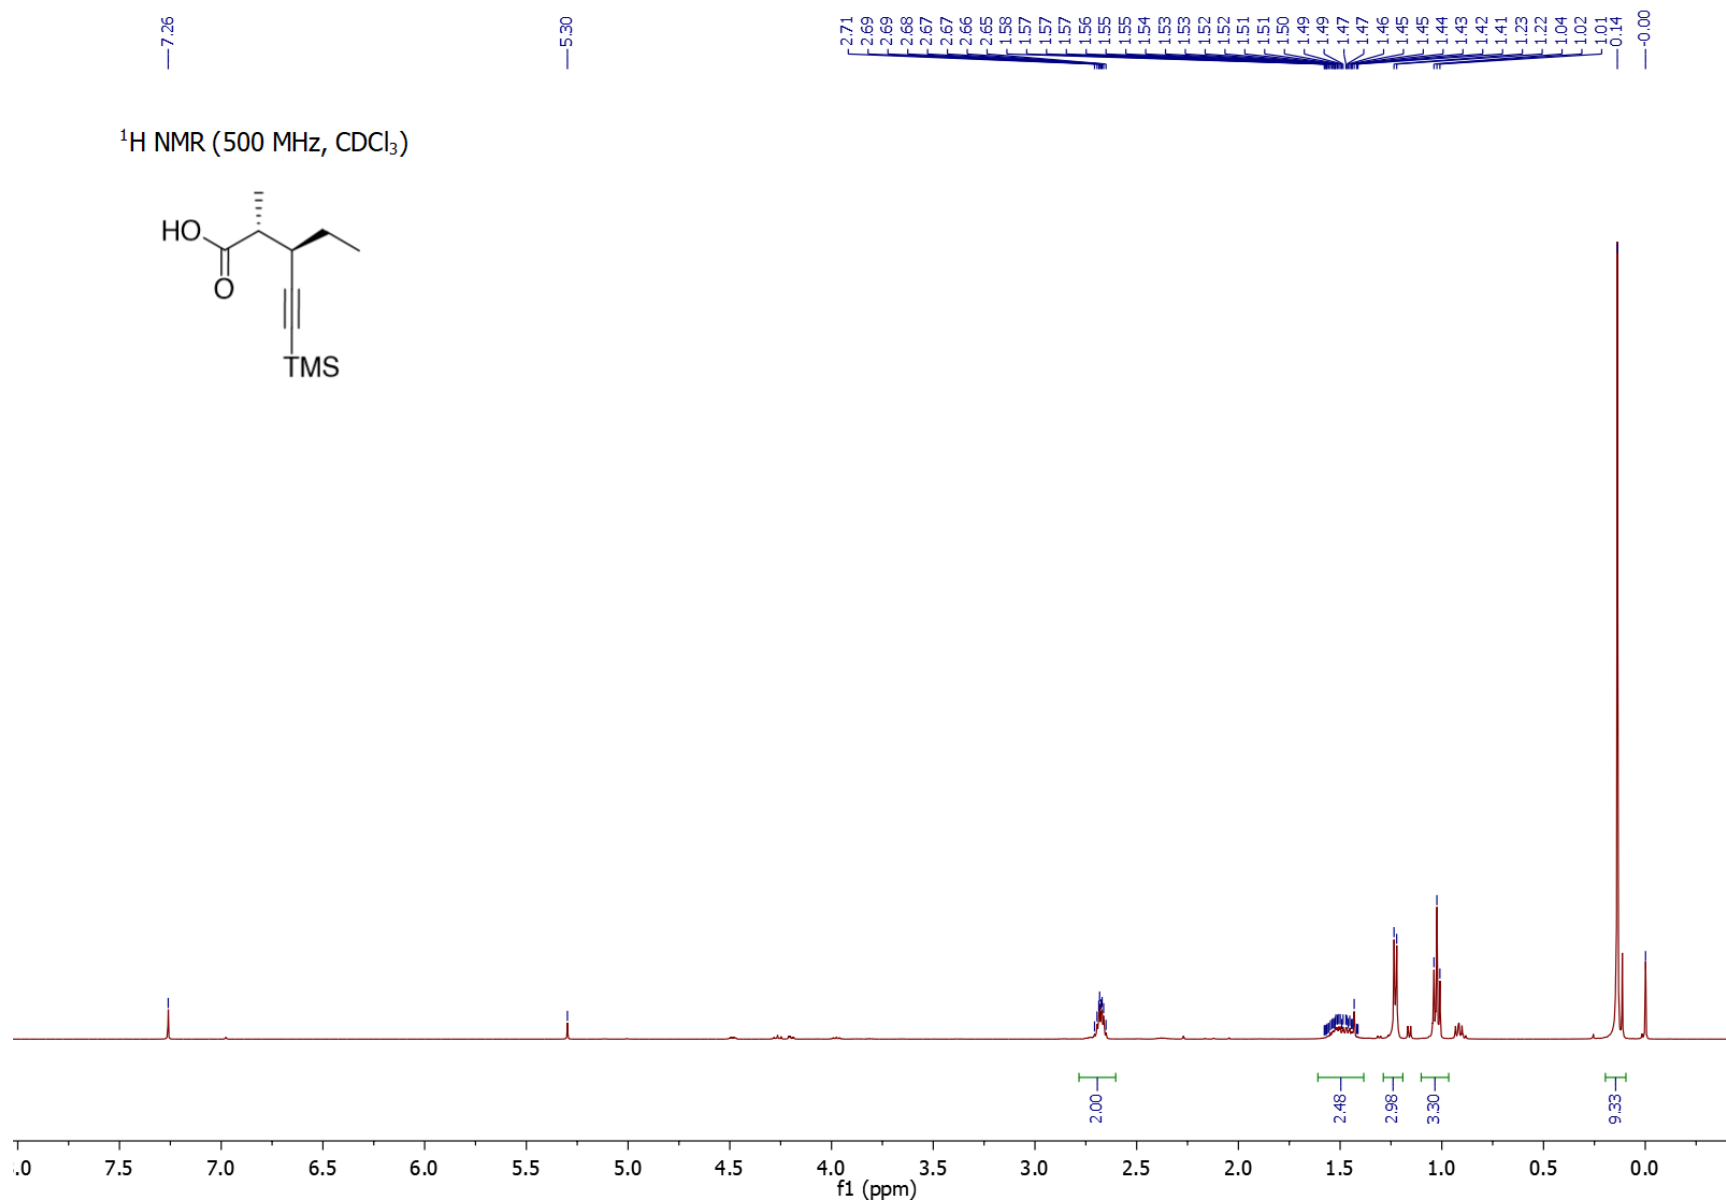

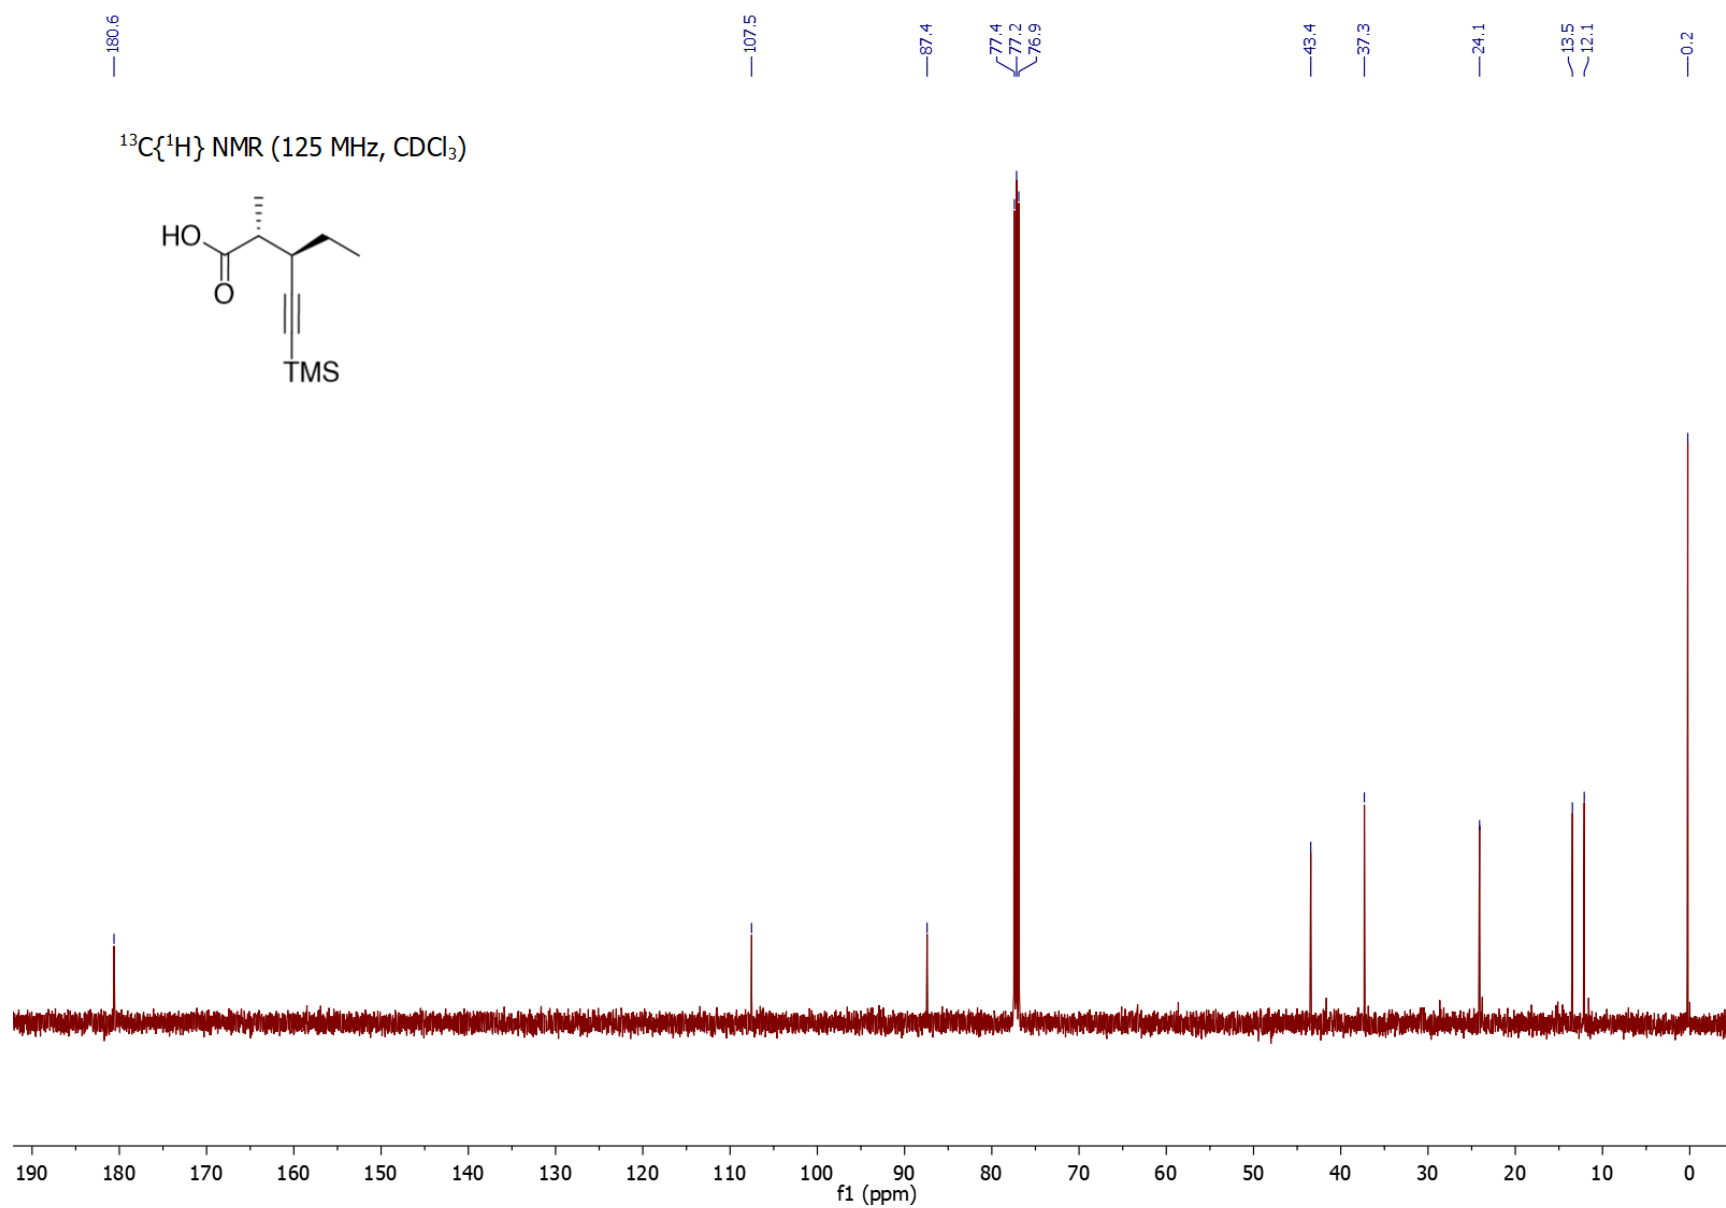

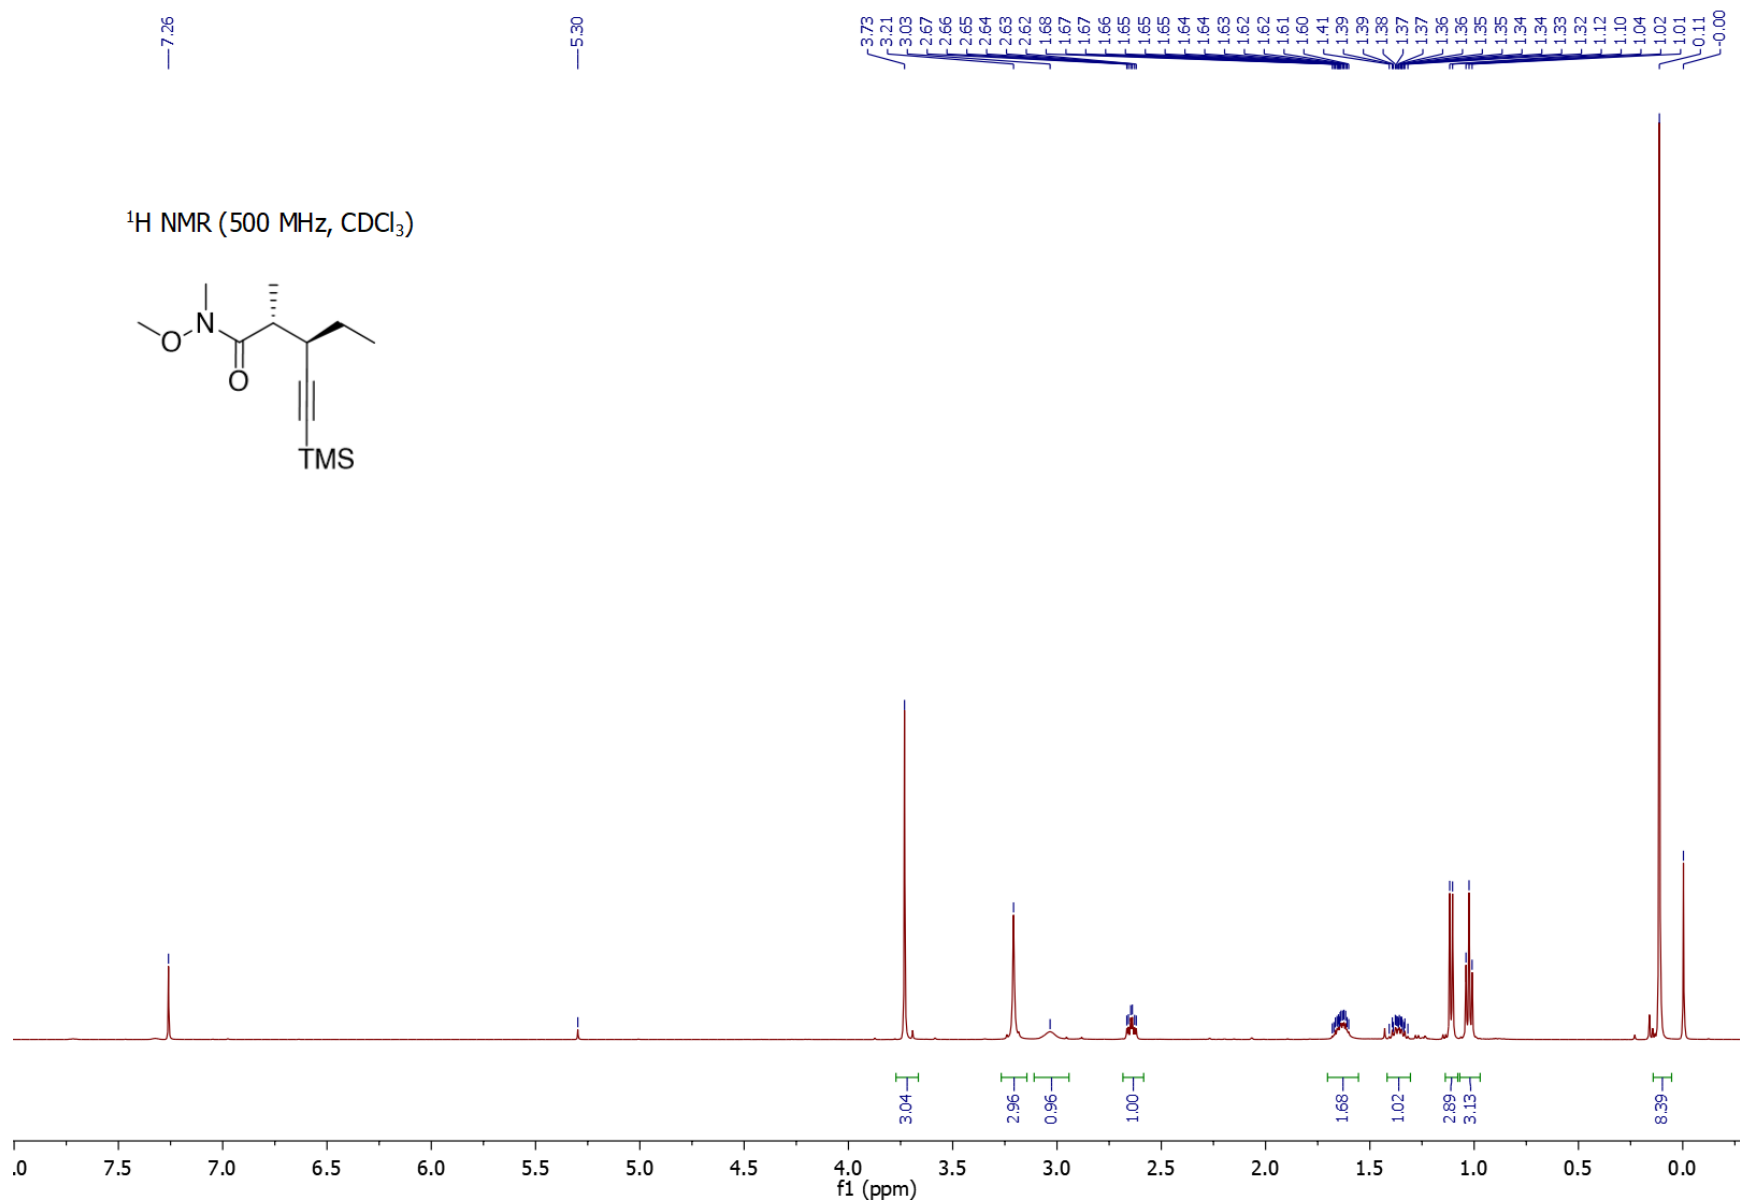



$^{13}\text{C}\{^1\text{H}\}$  NMR (125 MHz,  $\text{CDCl}_3$ )

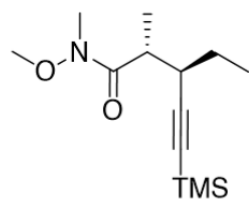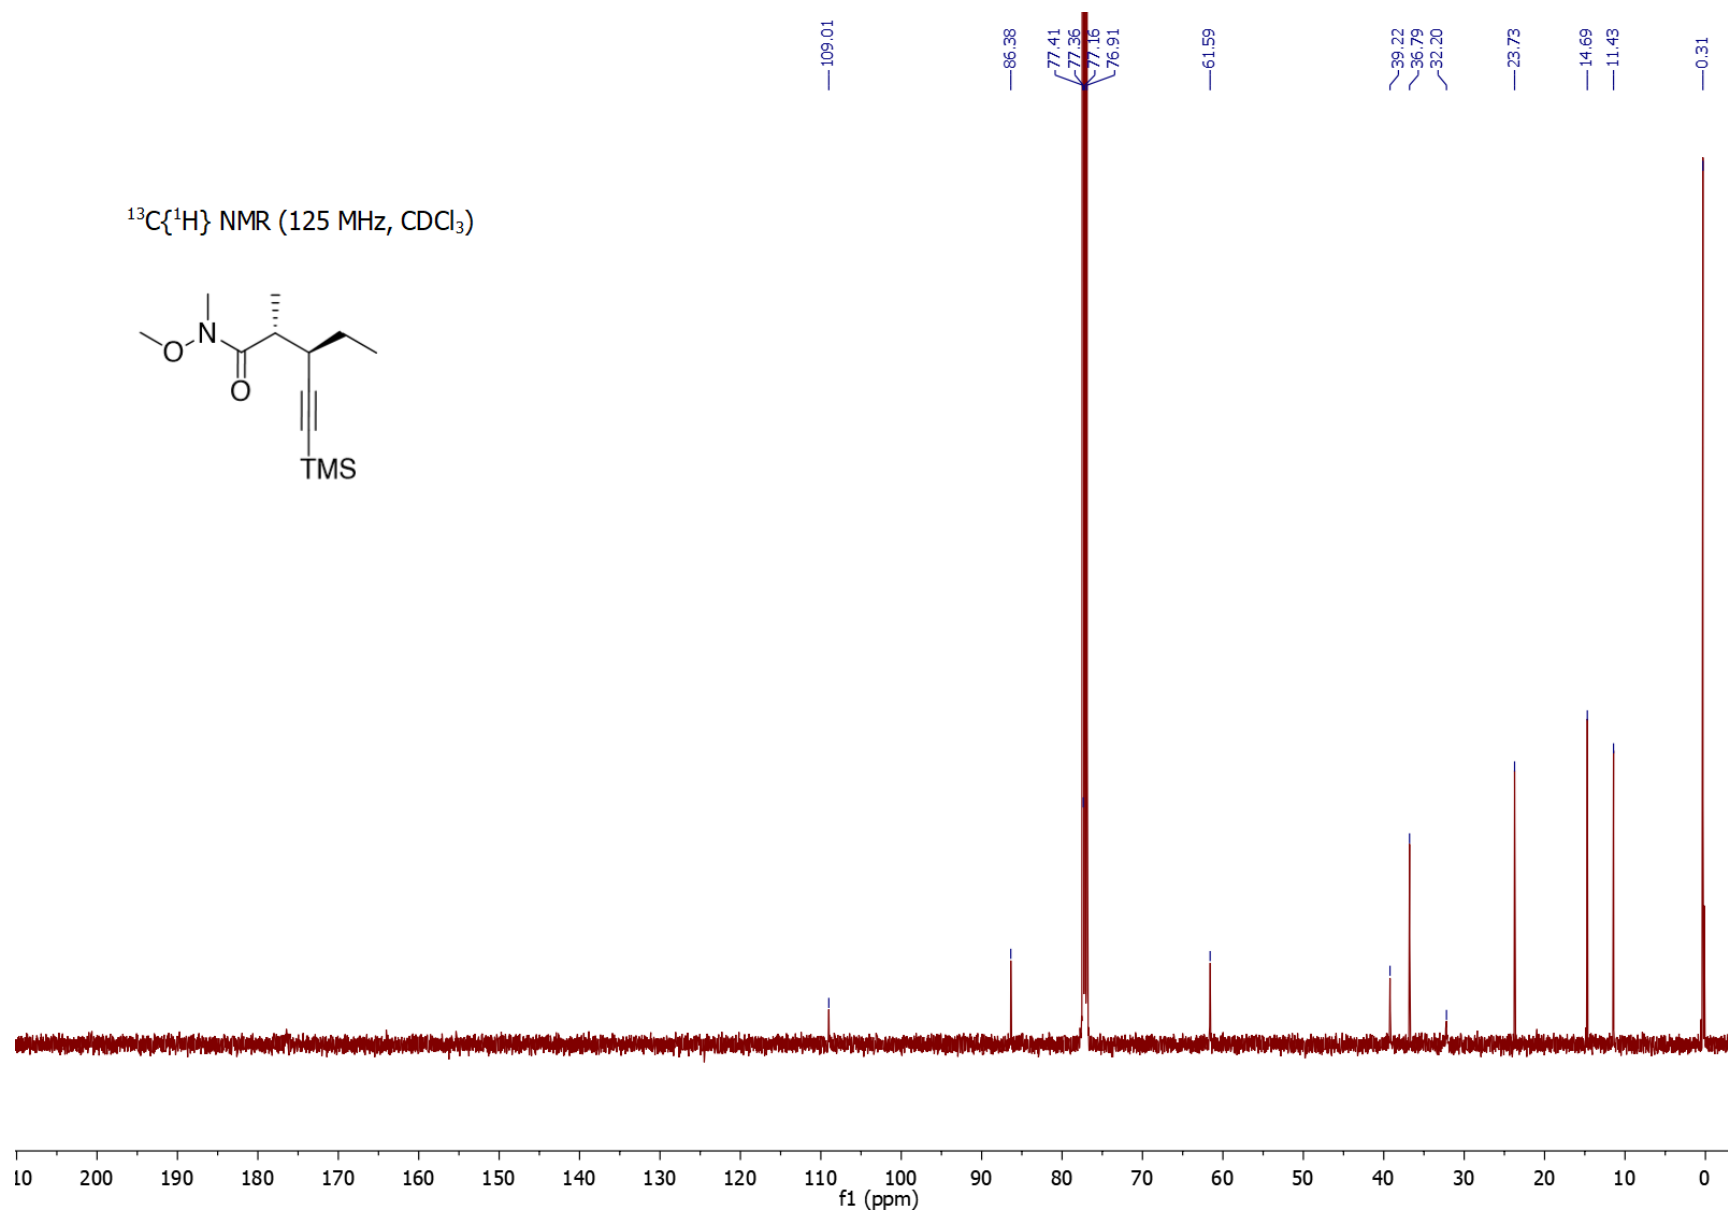

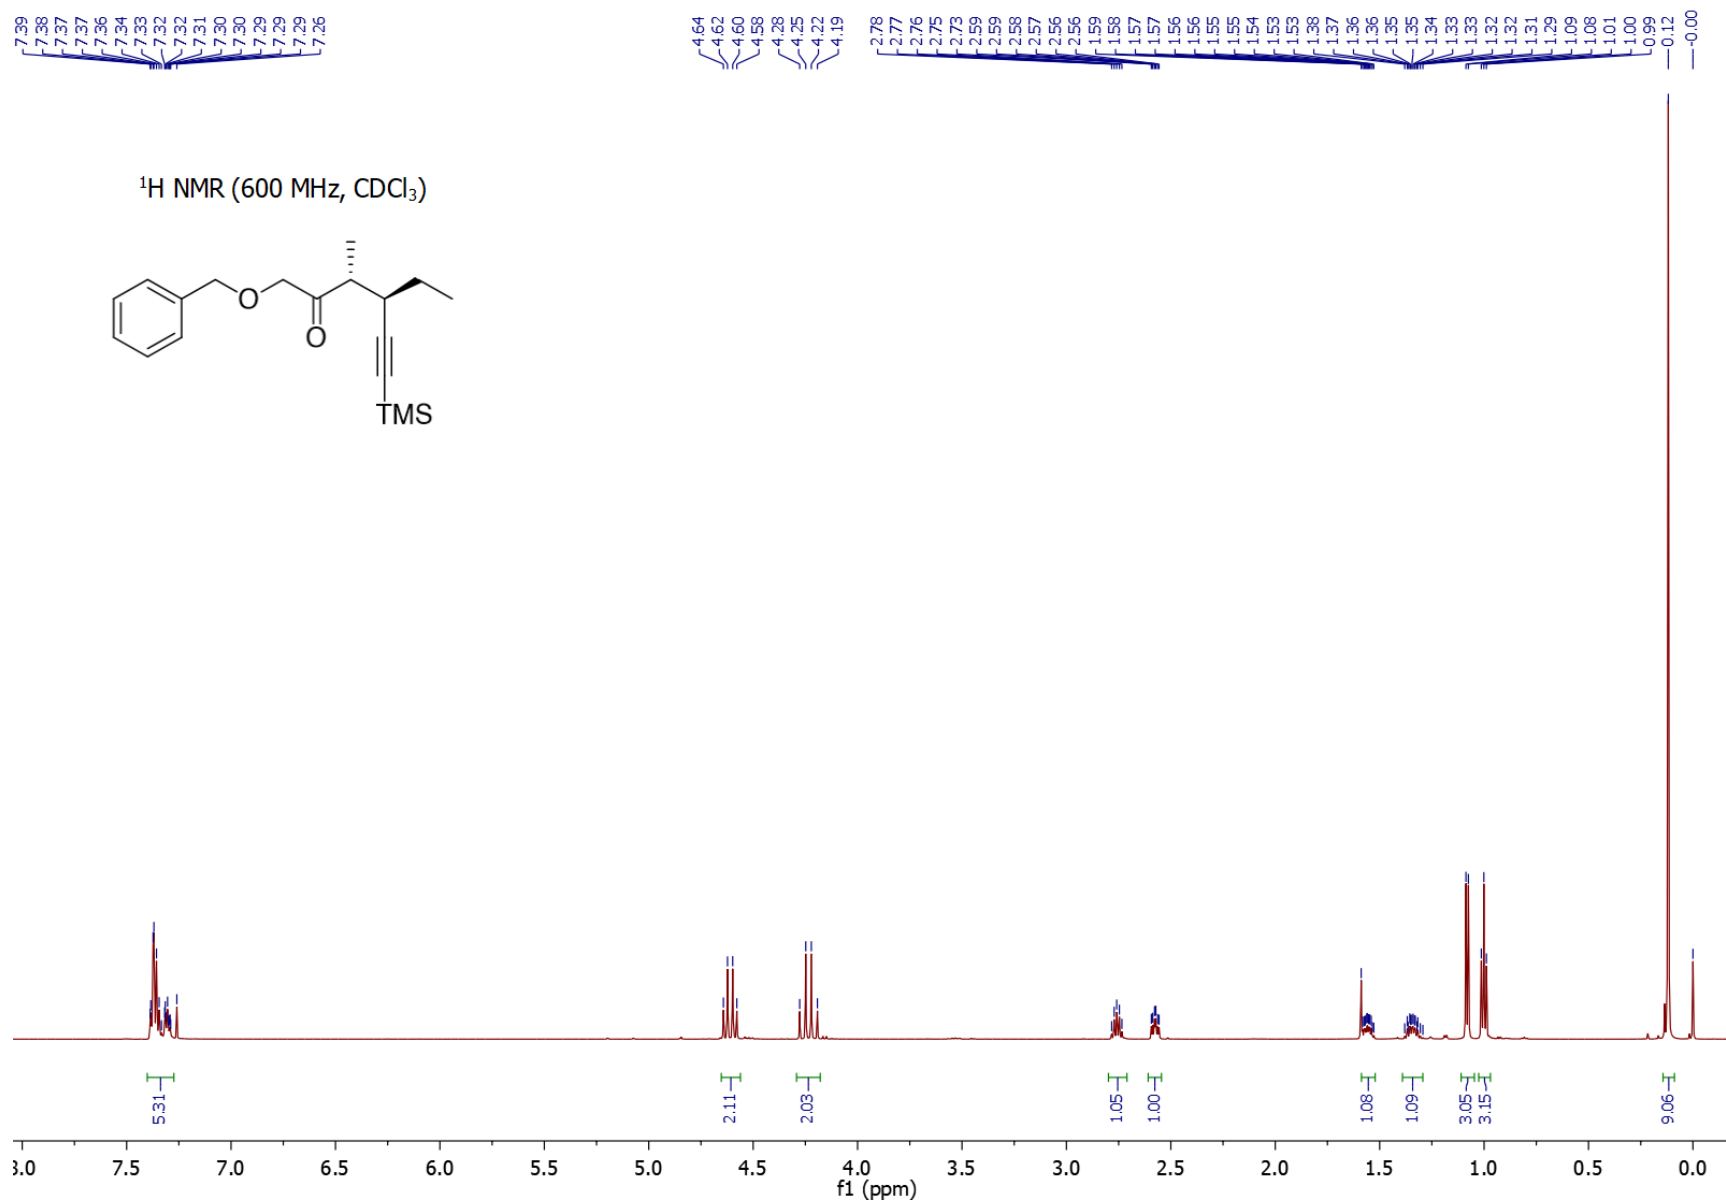

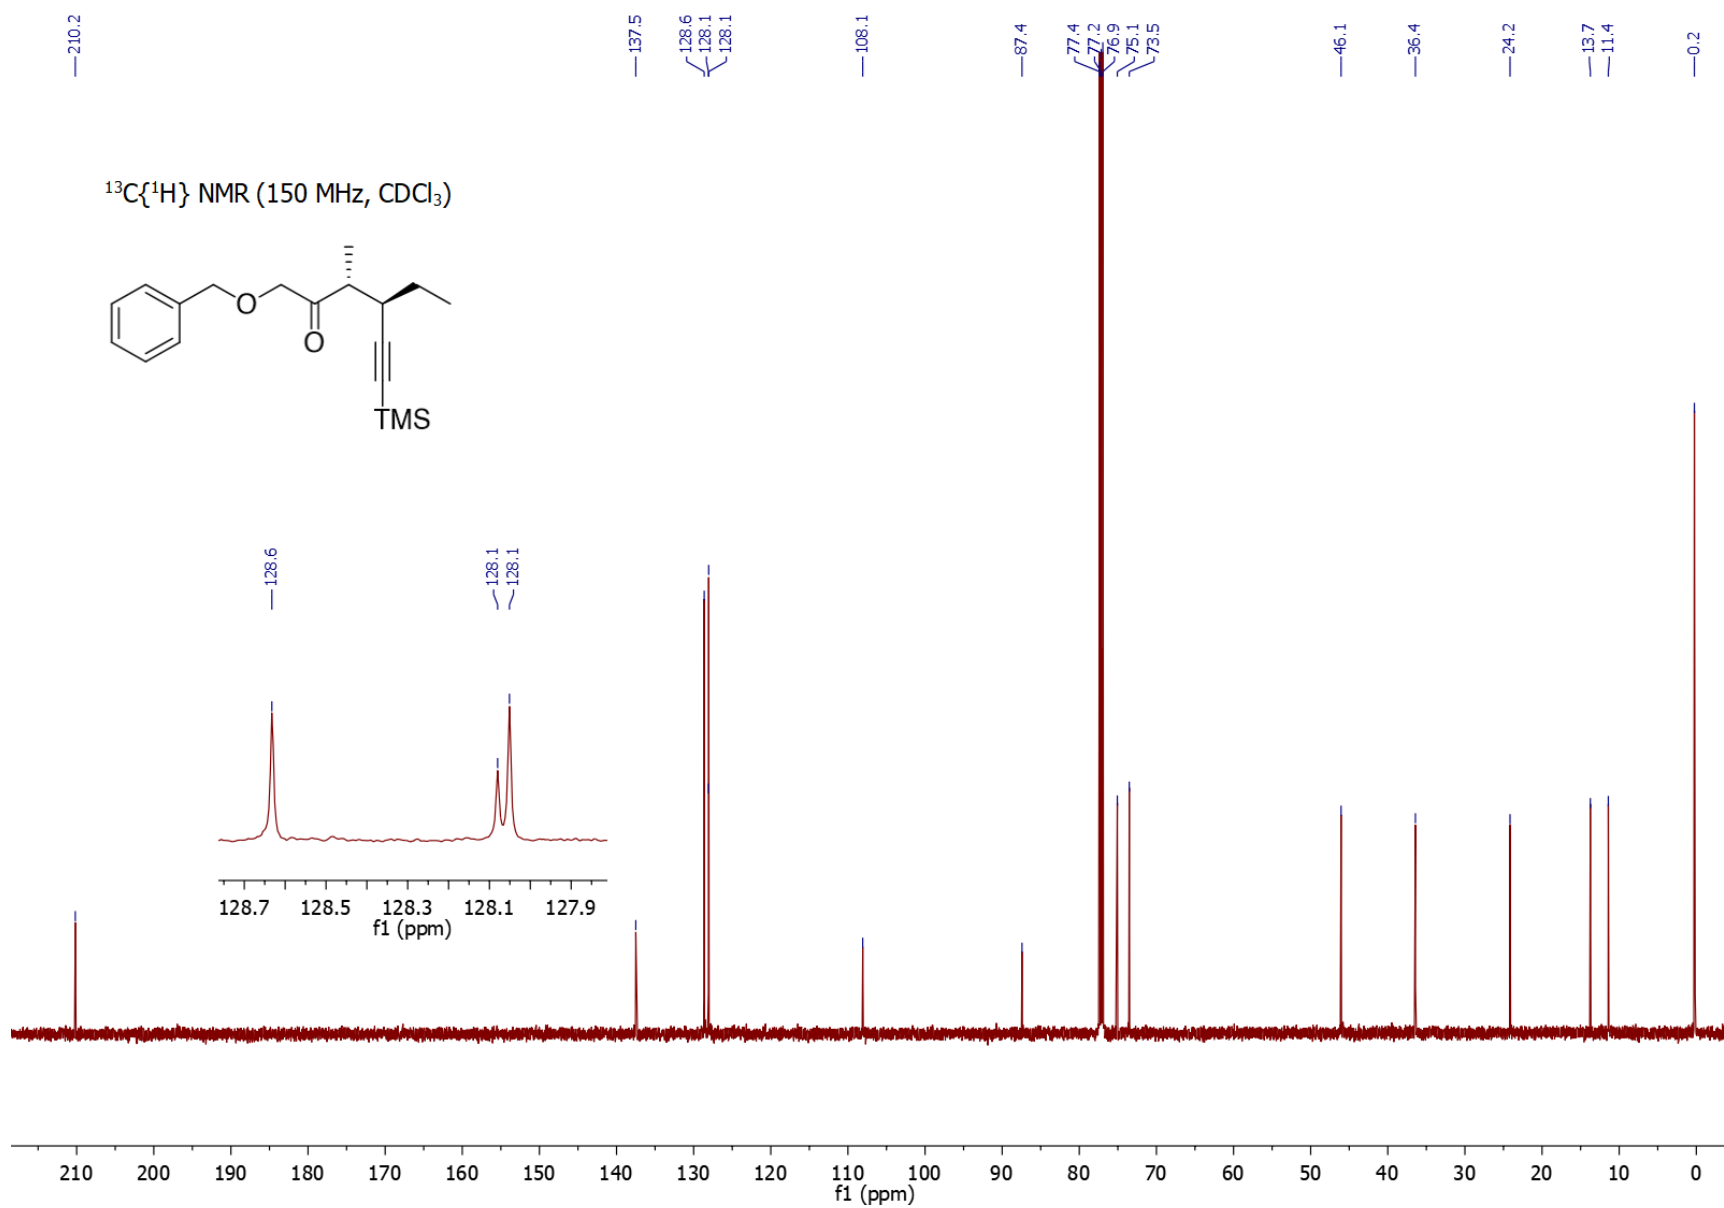

$^1\text{H}$  NMR (500 MHz,  $\text{CDCl}_3$ )

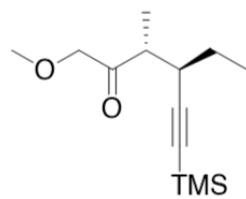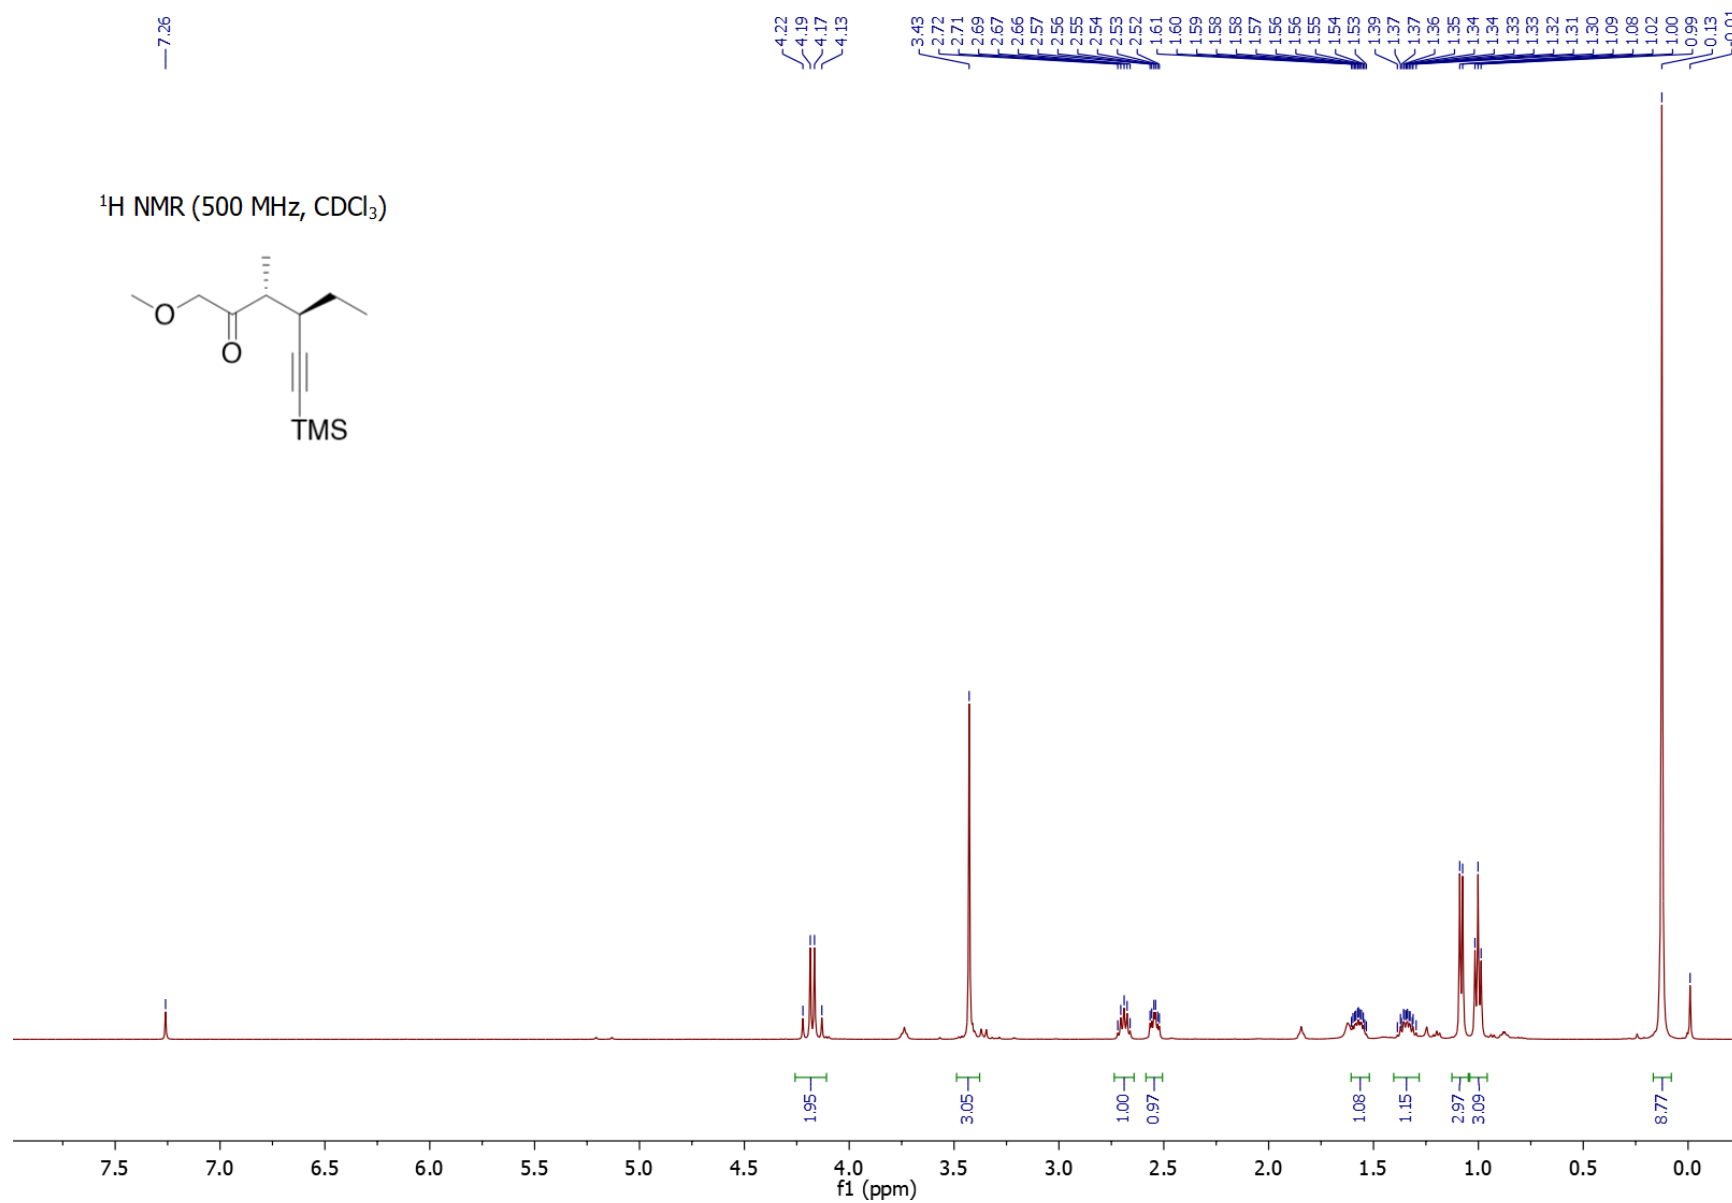

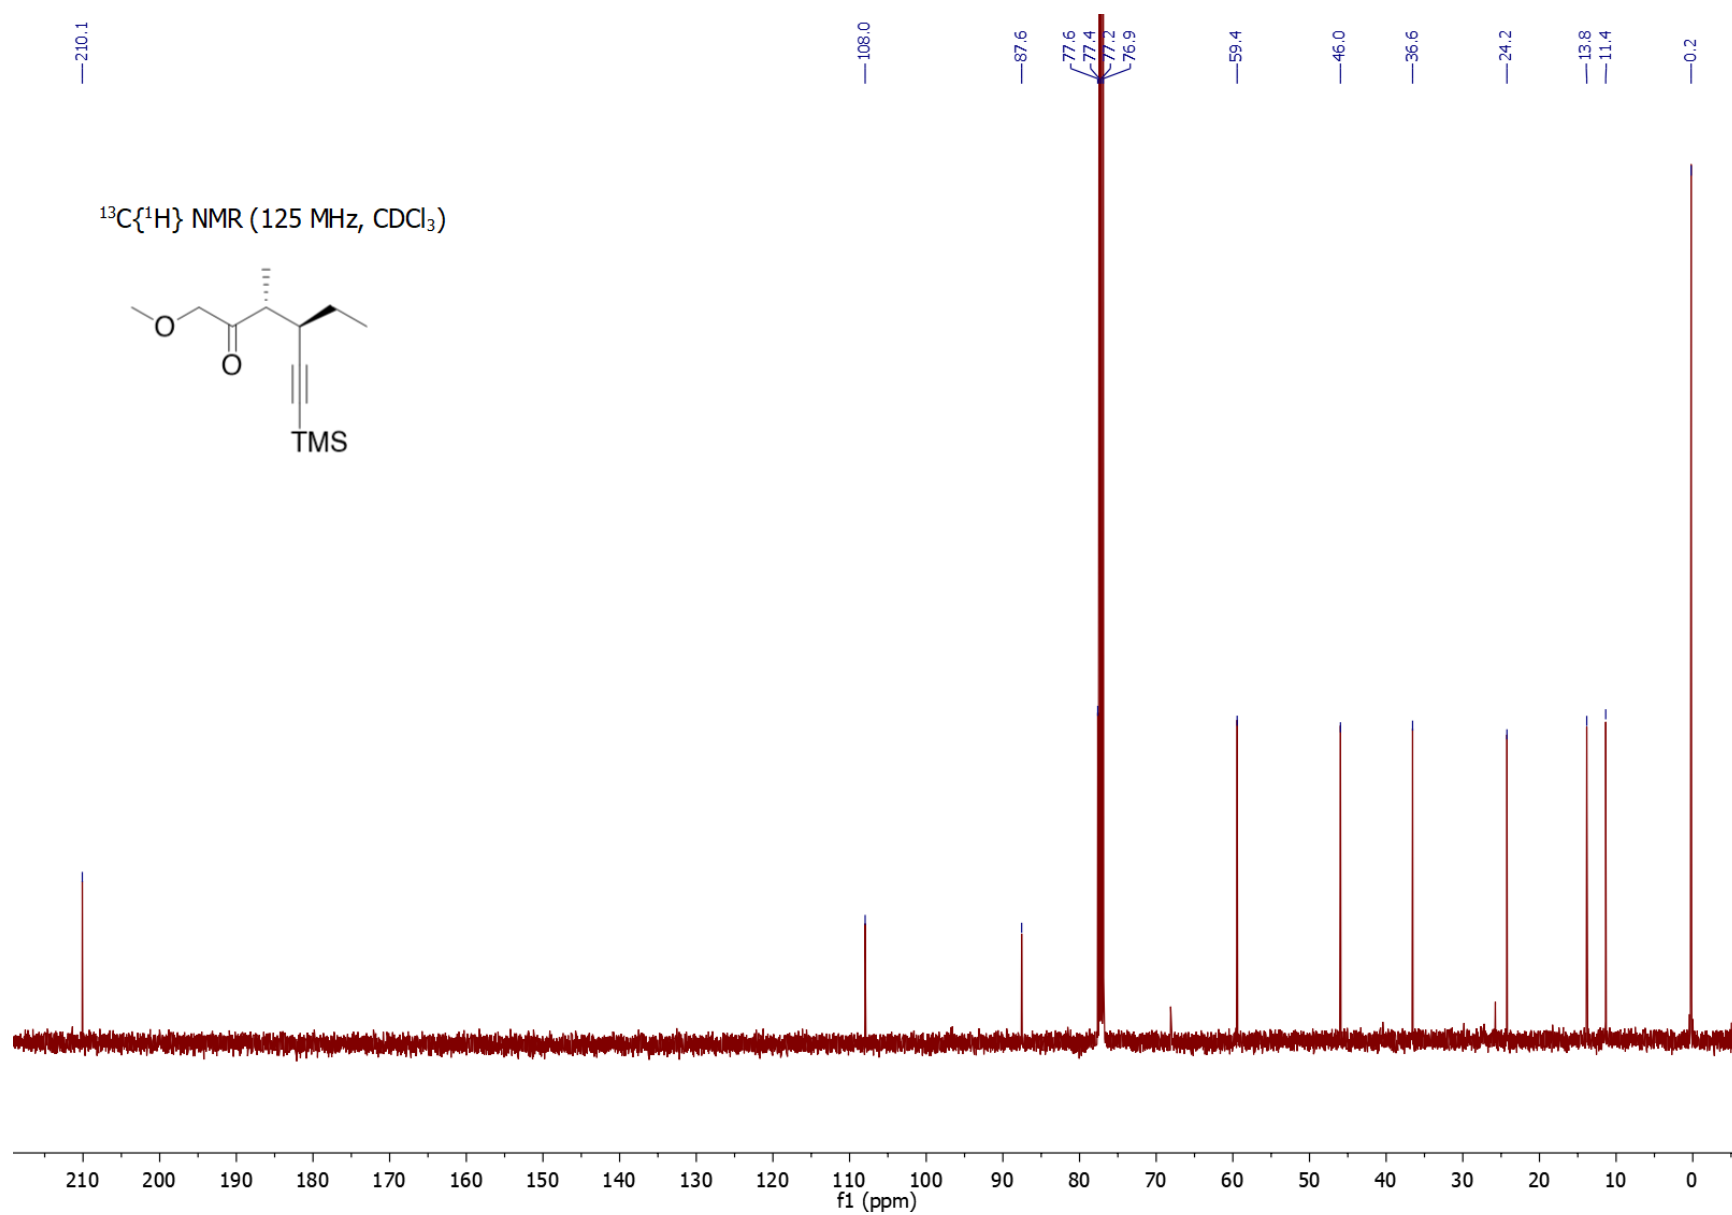

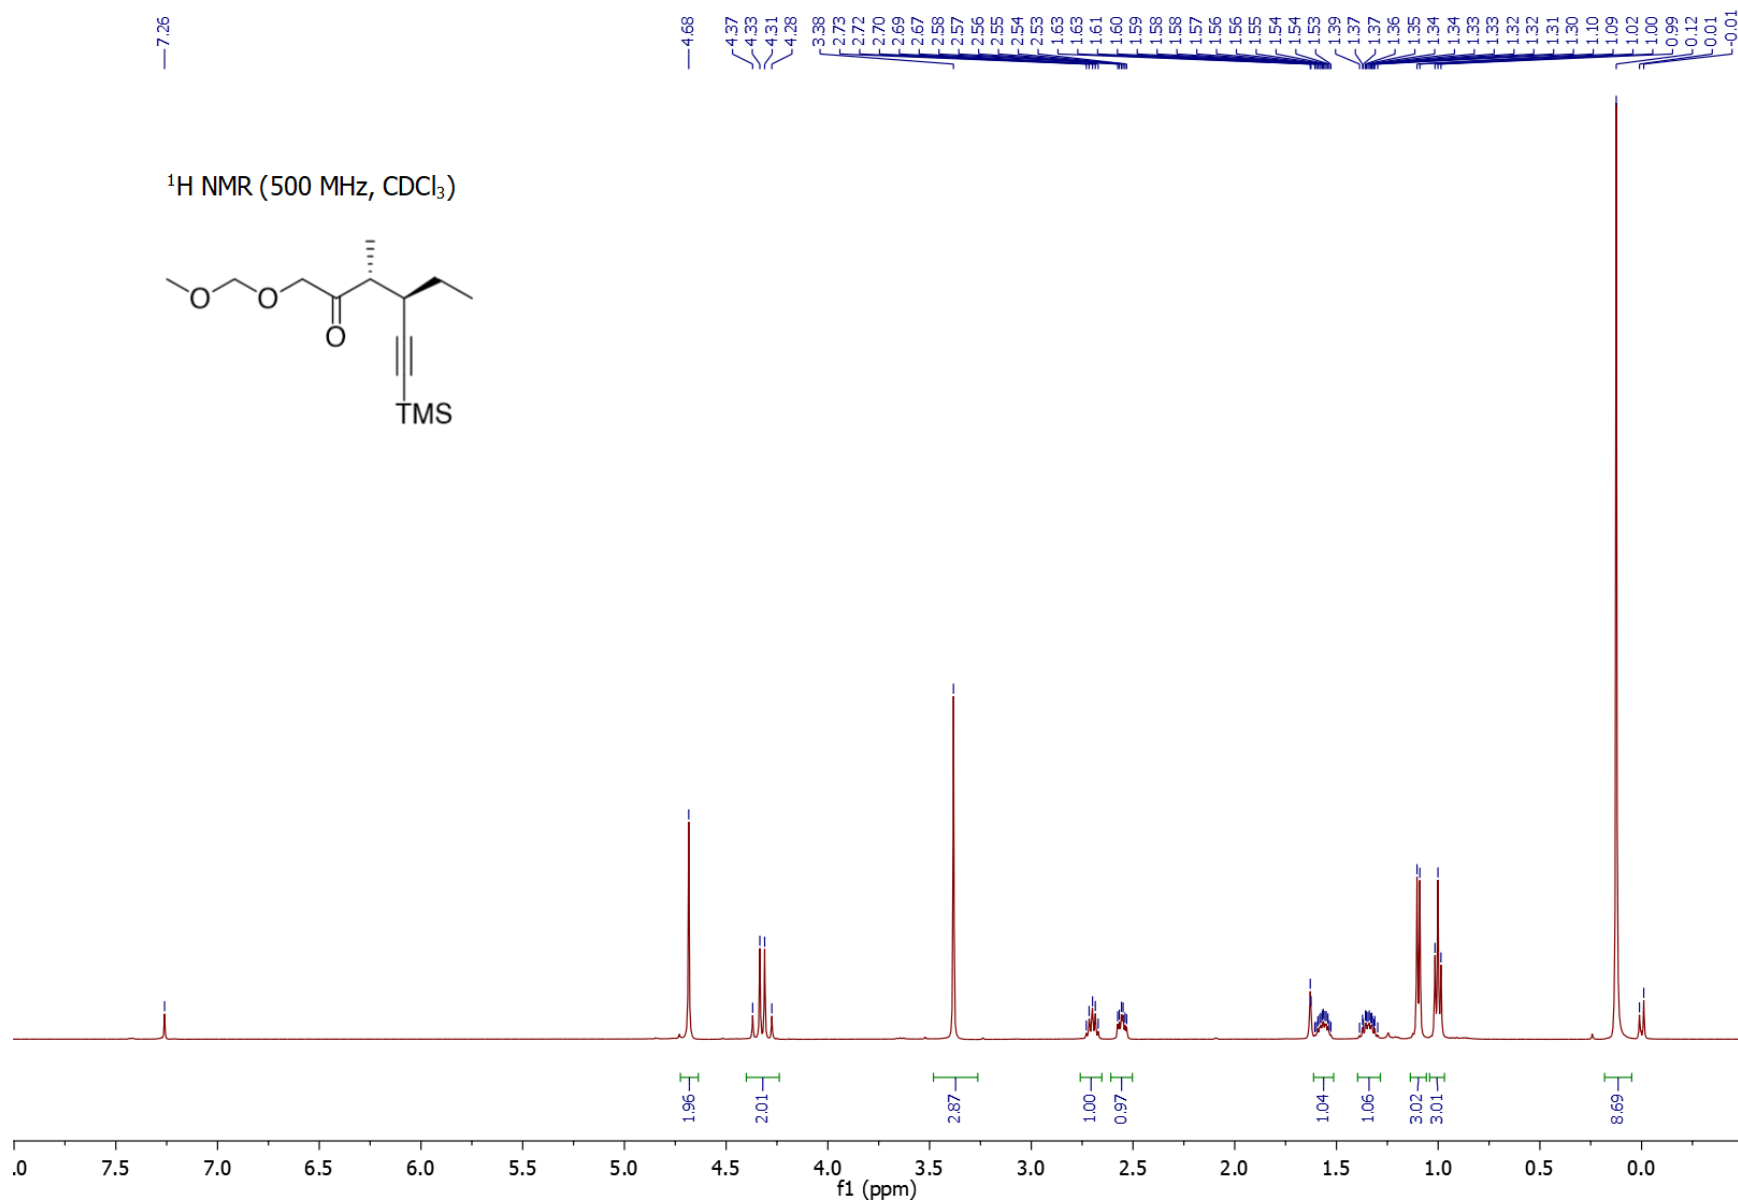

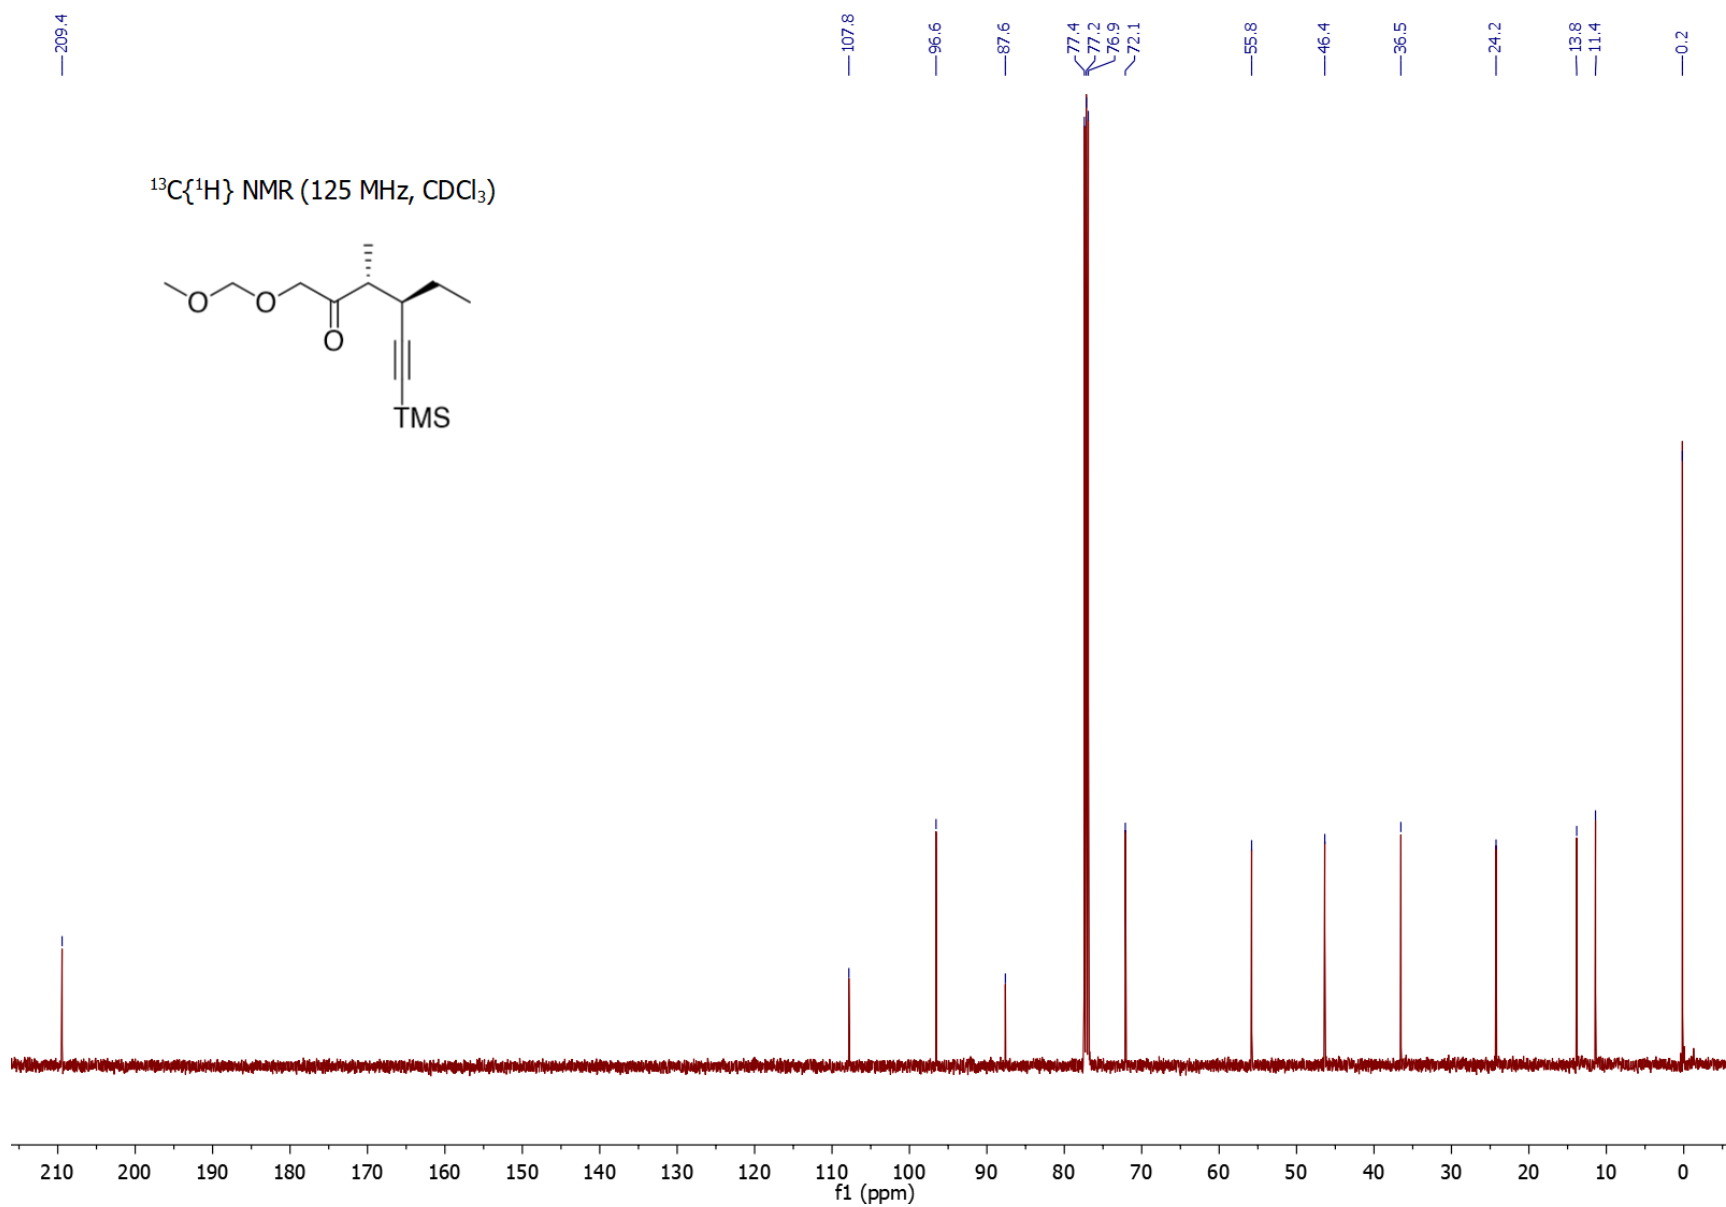

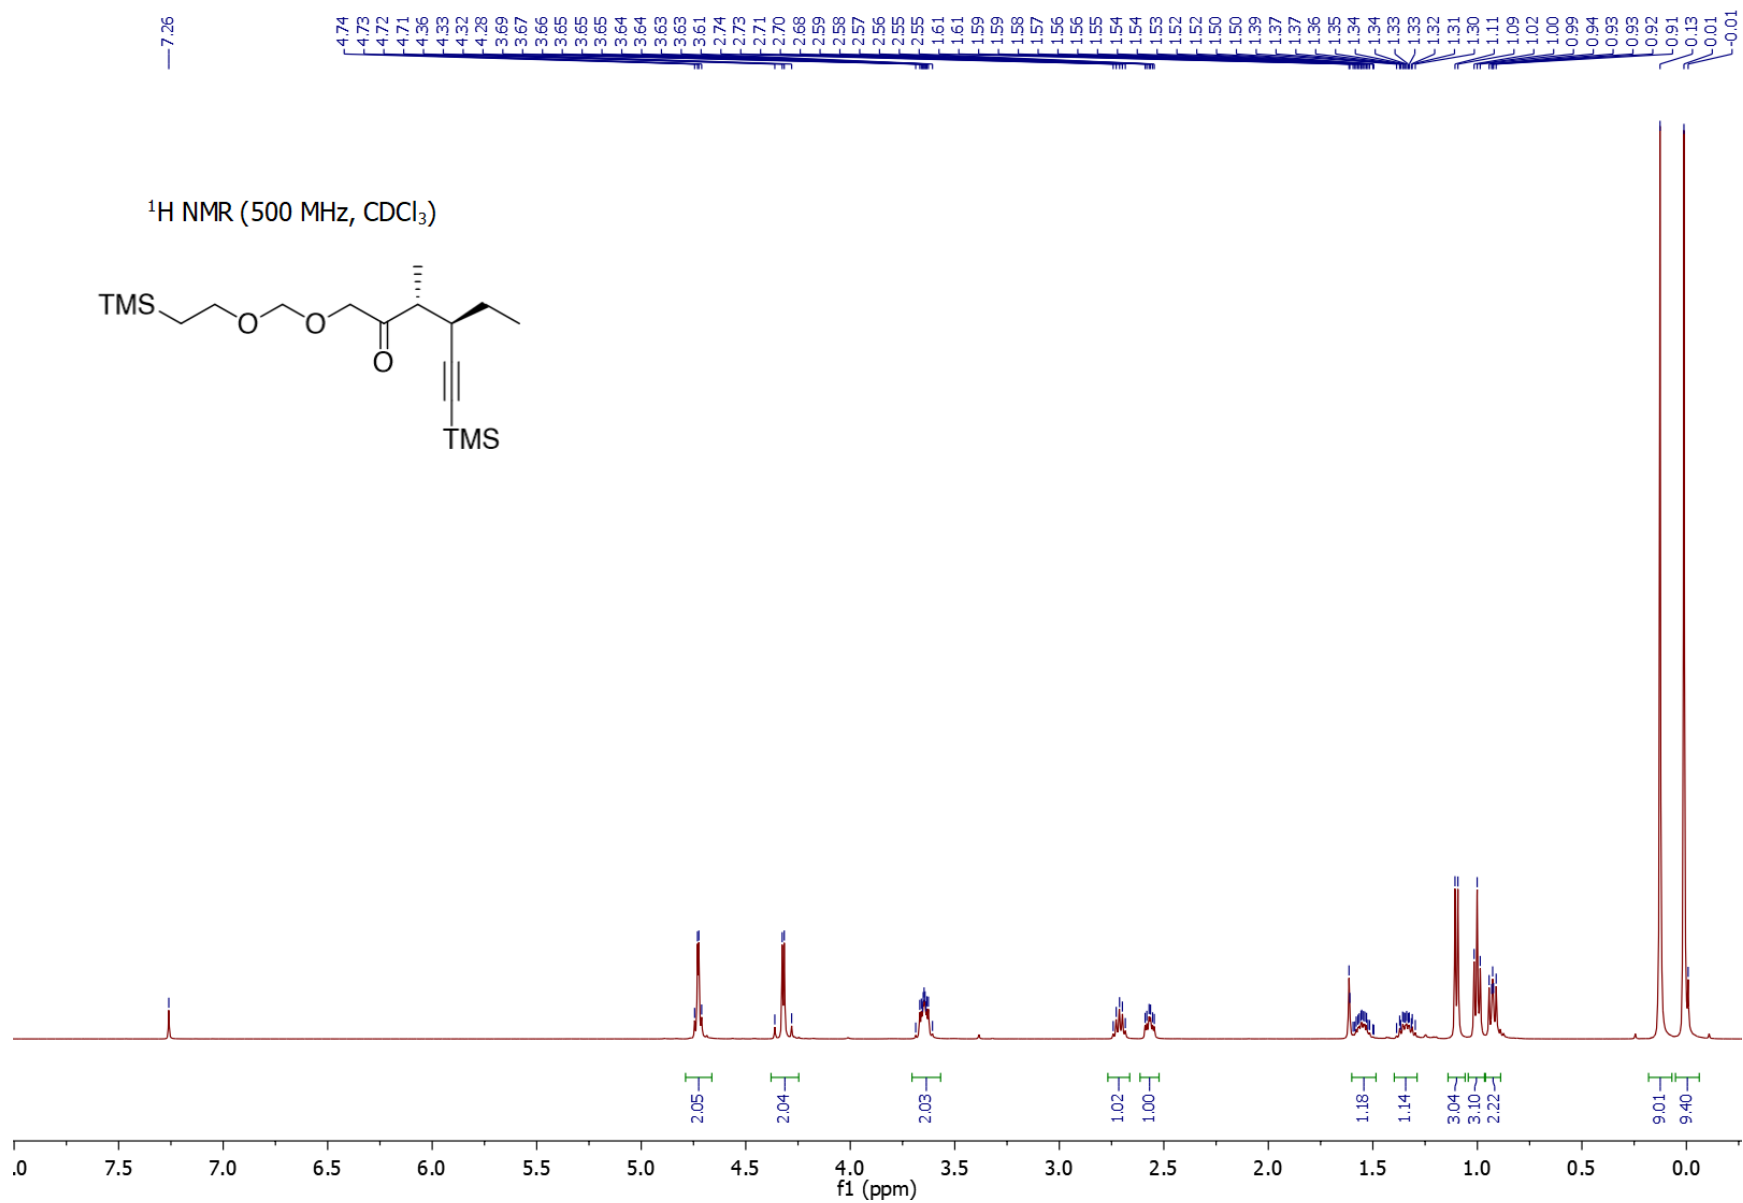





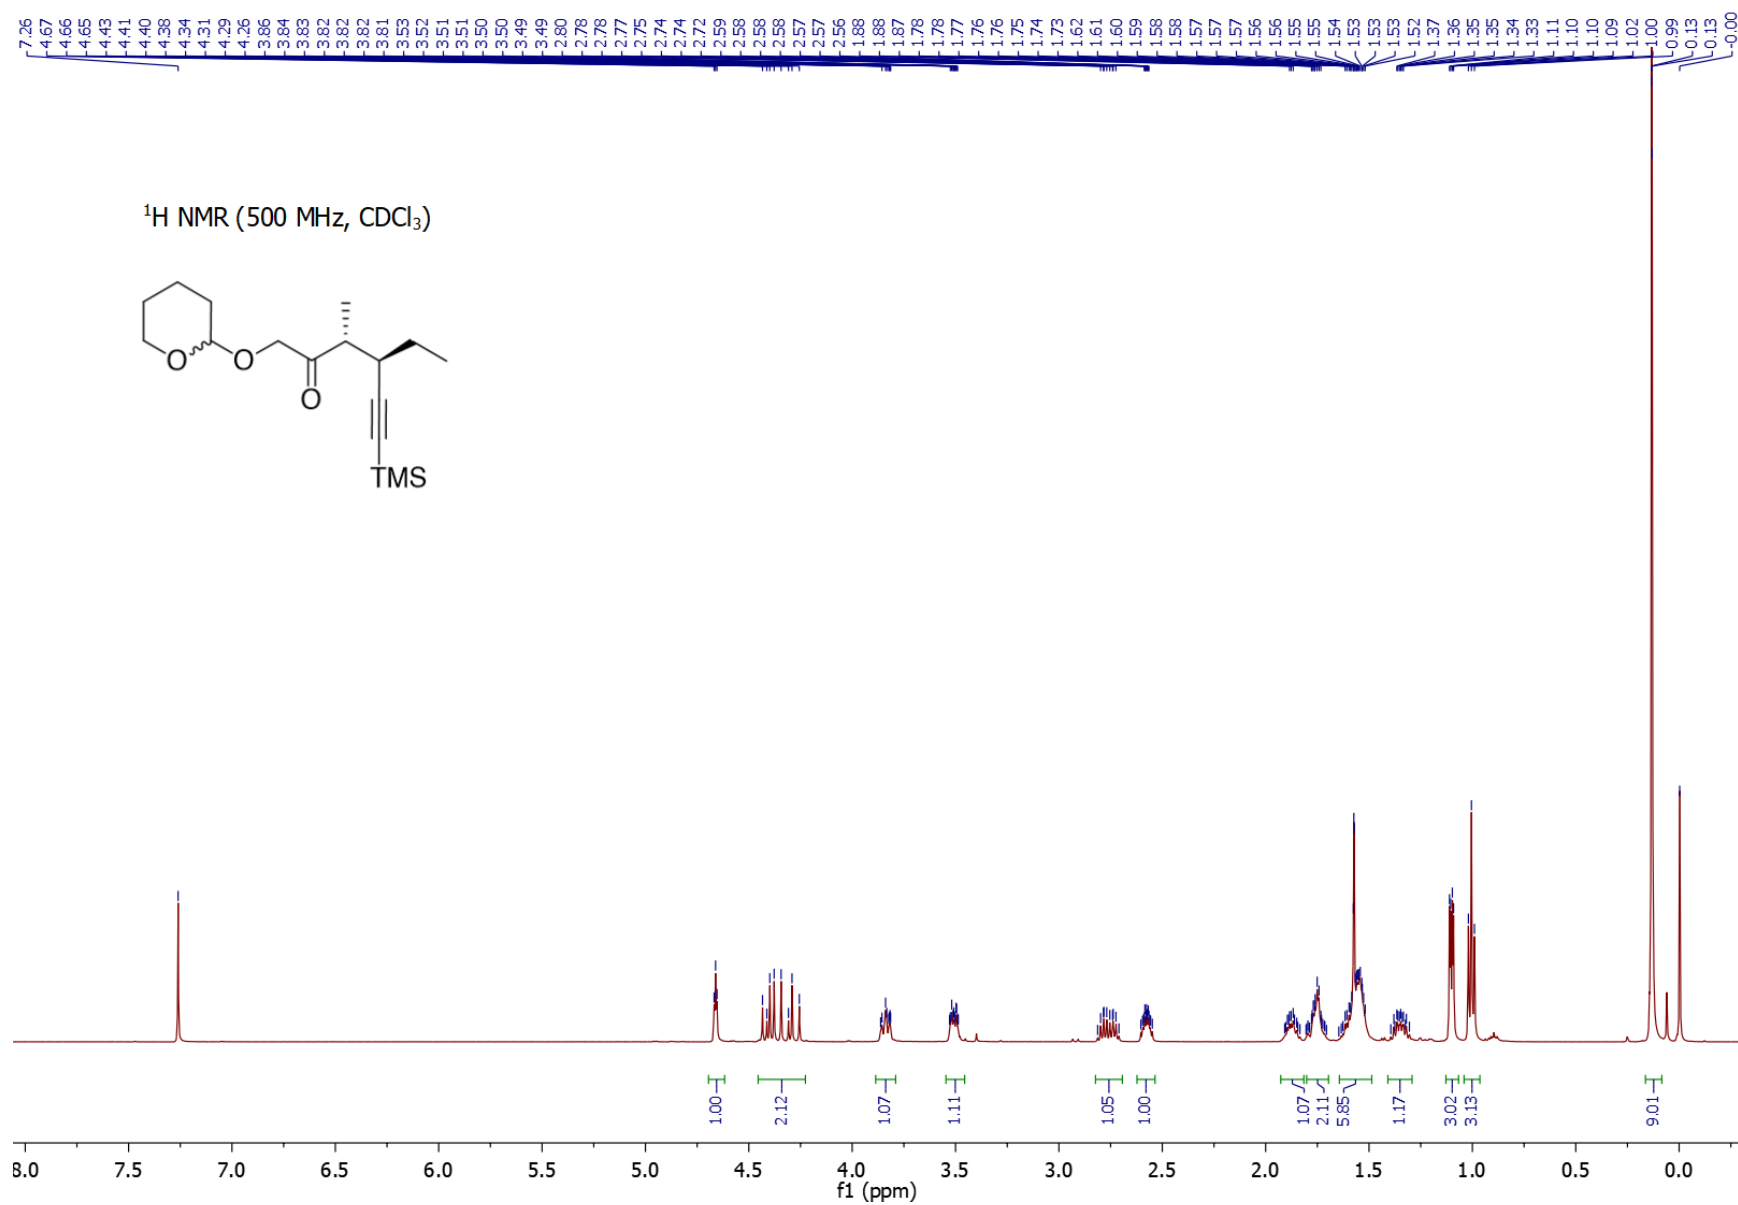

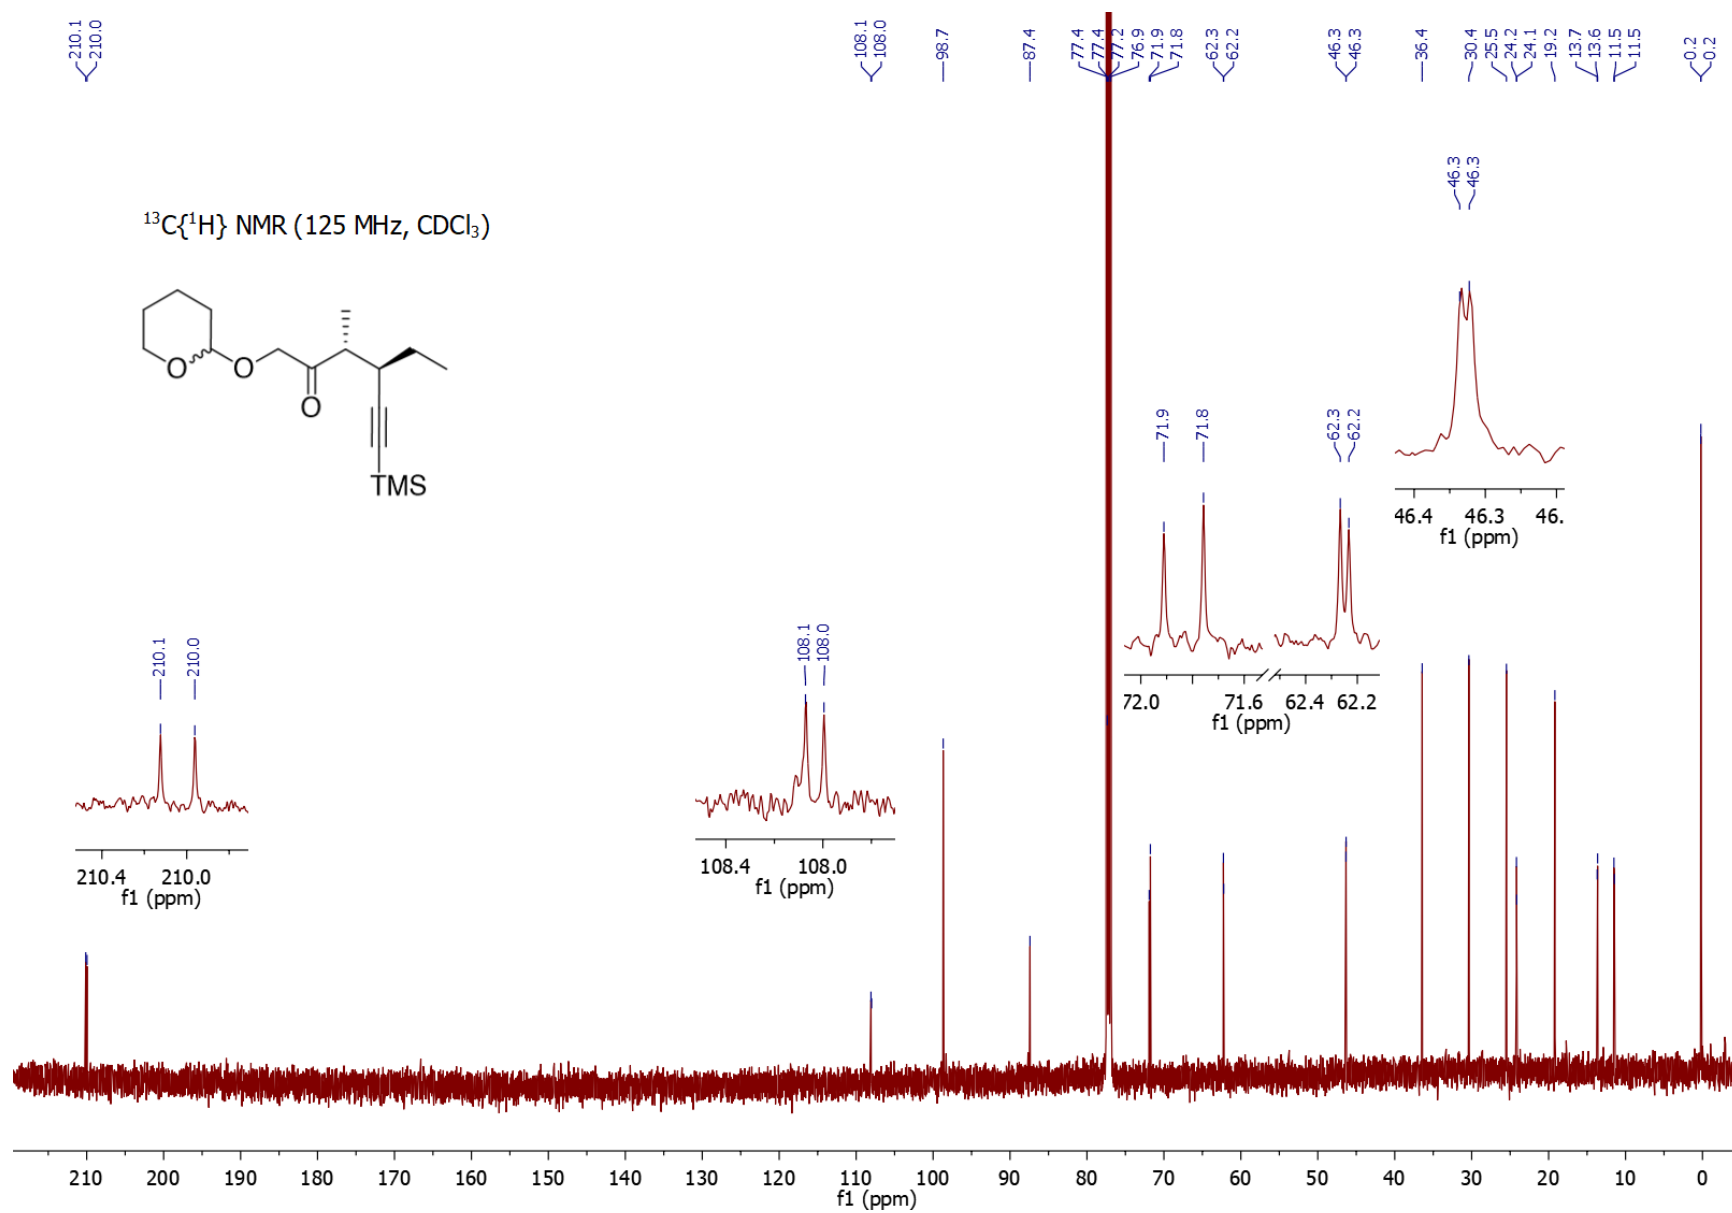

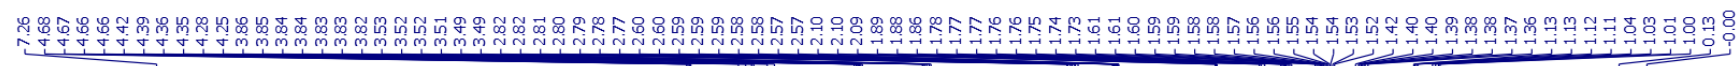

$^1\text{H}$  NMR (500 MHz,  $\text{CDCl}_3$ )

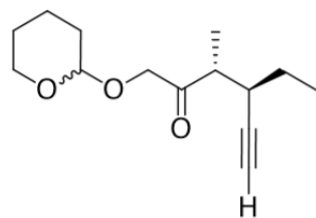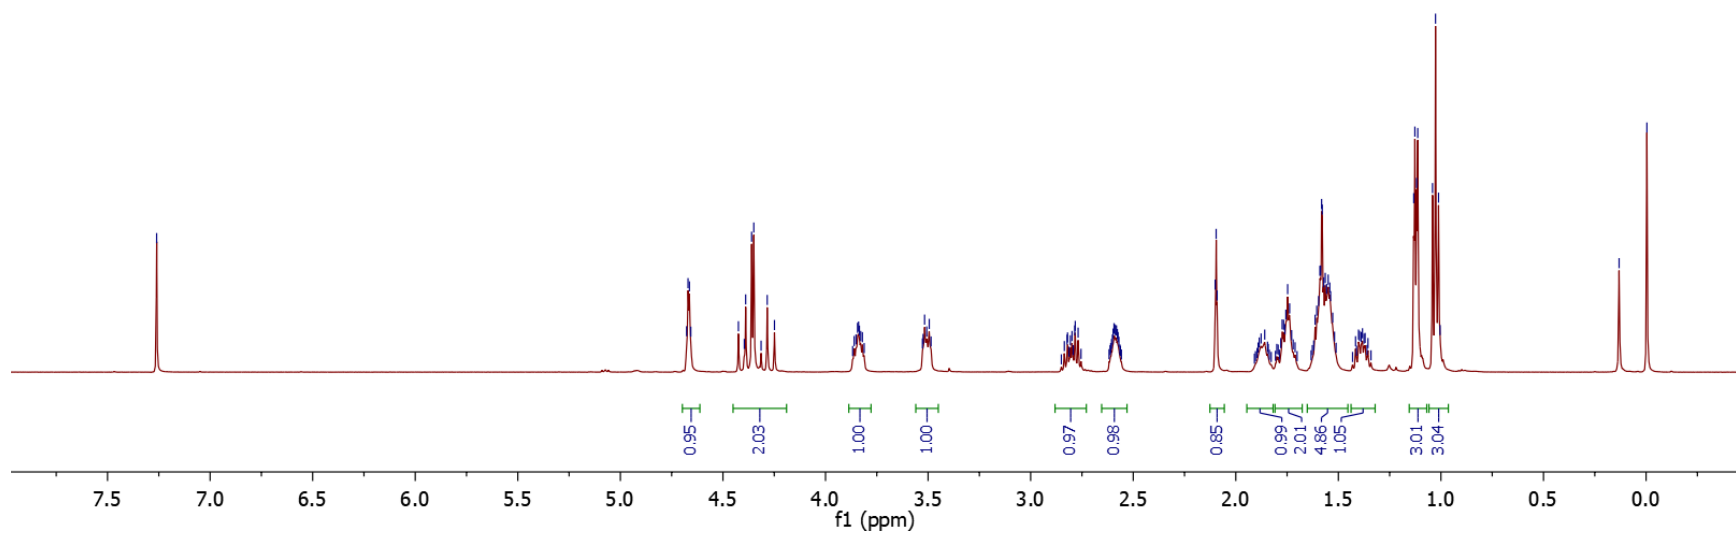

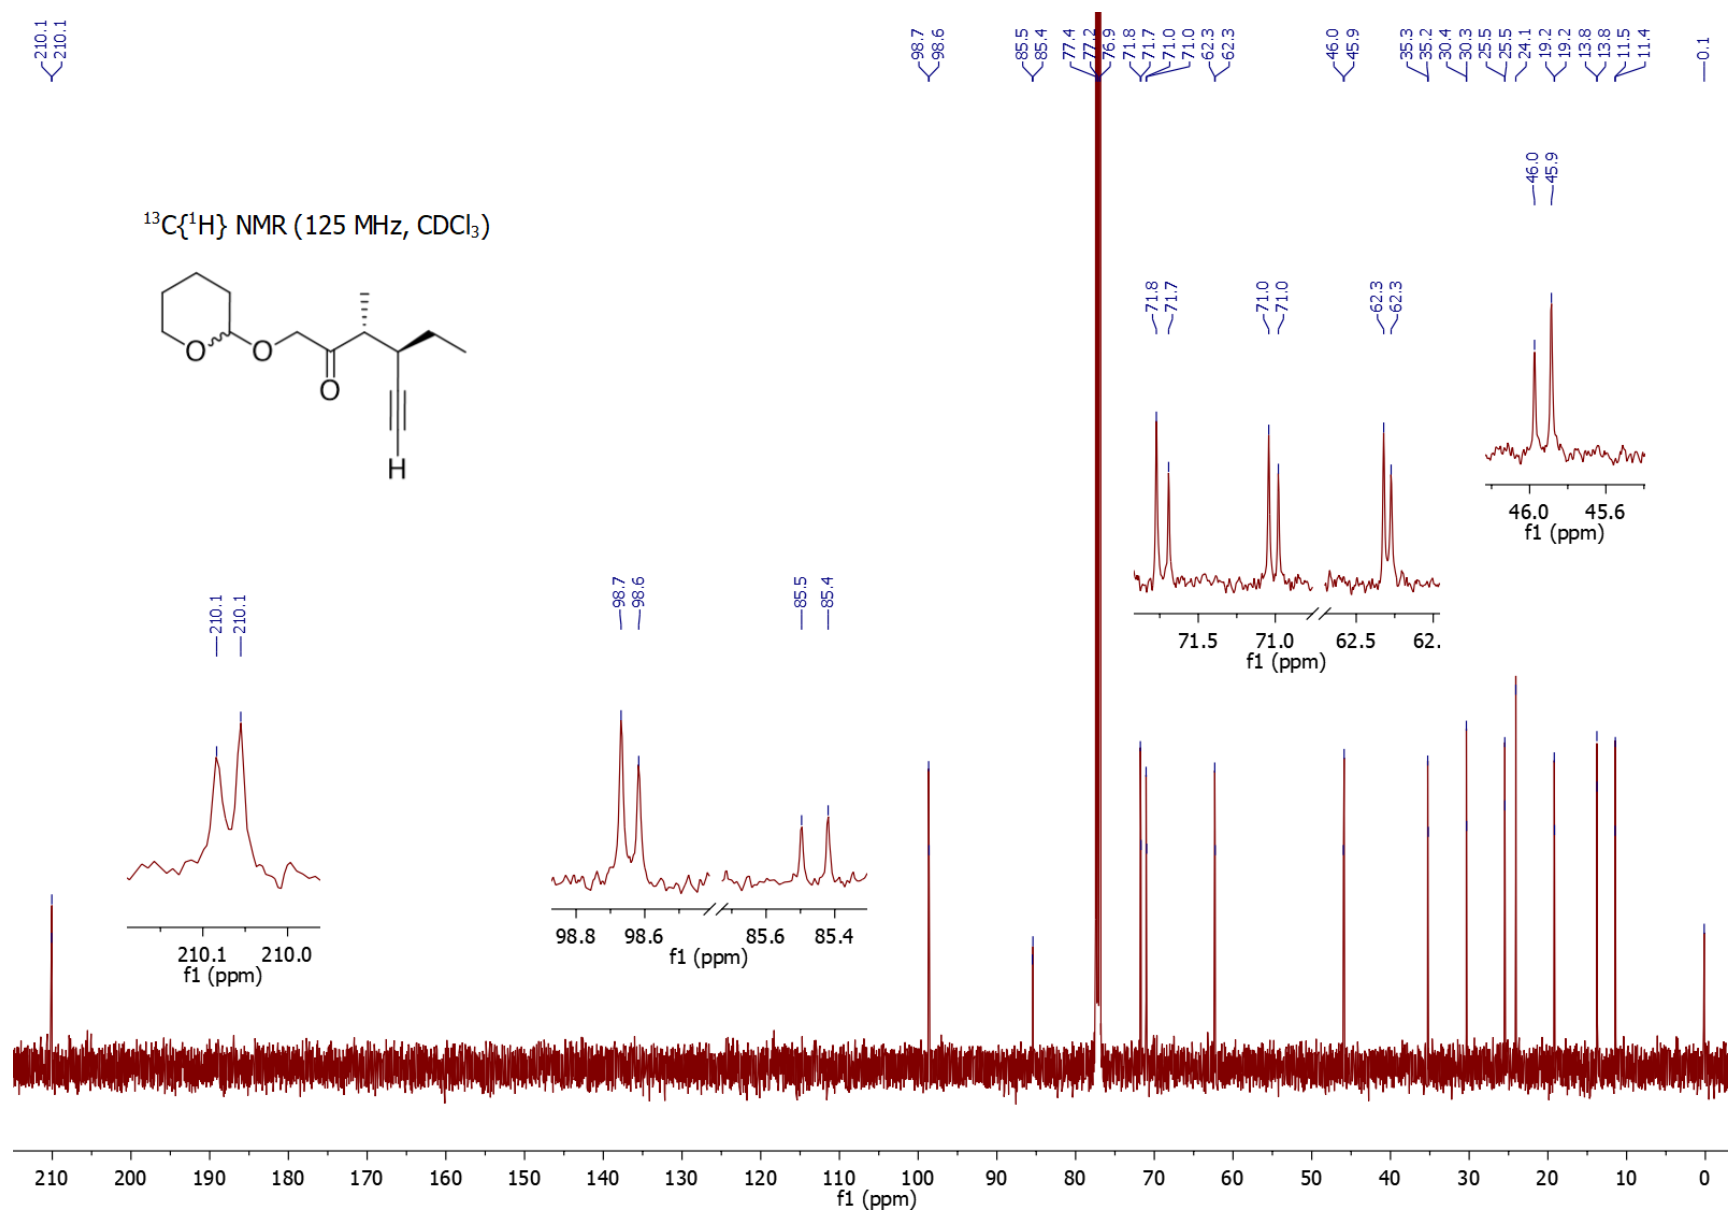

$^1\text{H}$  NMR (500 MHz,  $\text{CDCl}_3$ )

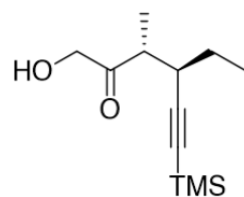

from **14-OTHP**

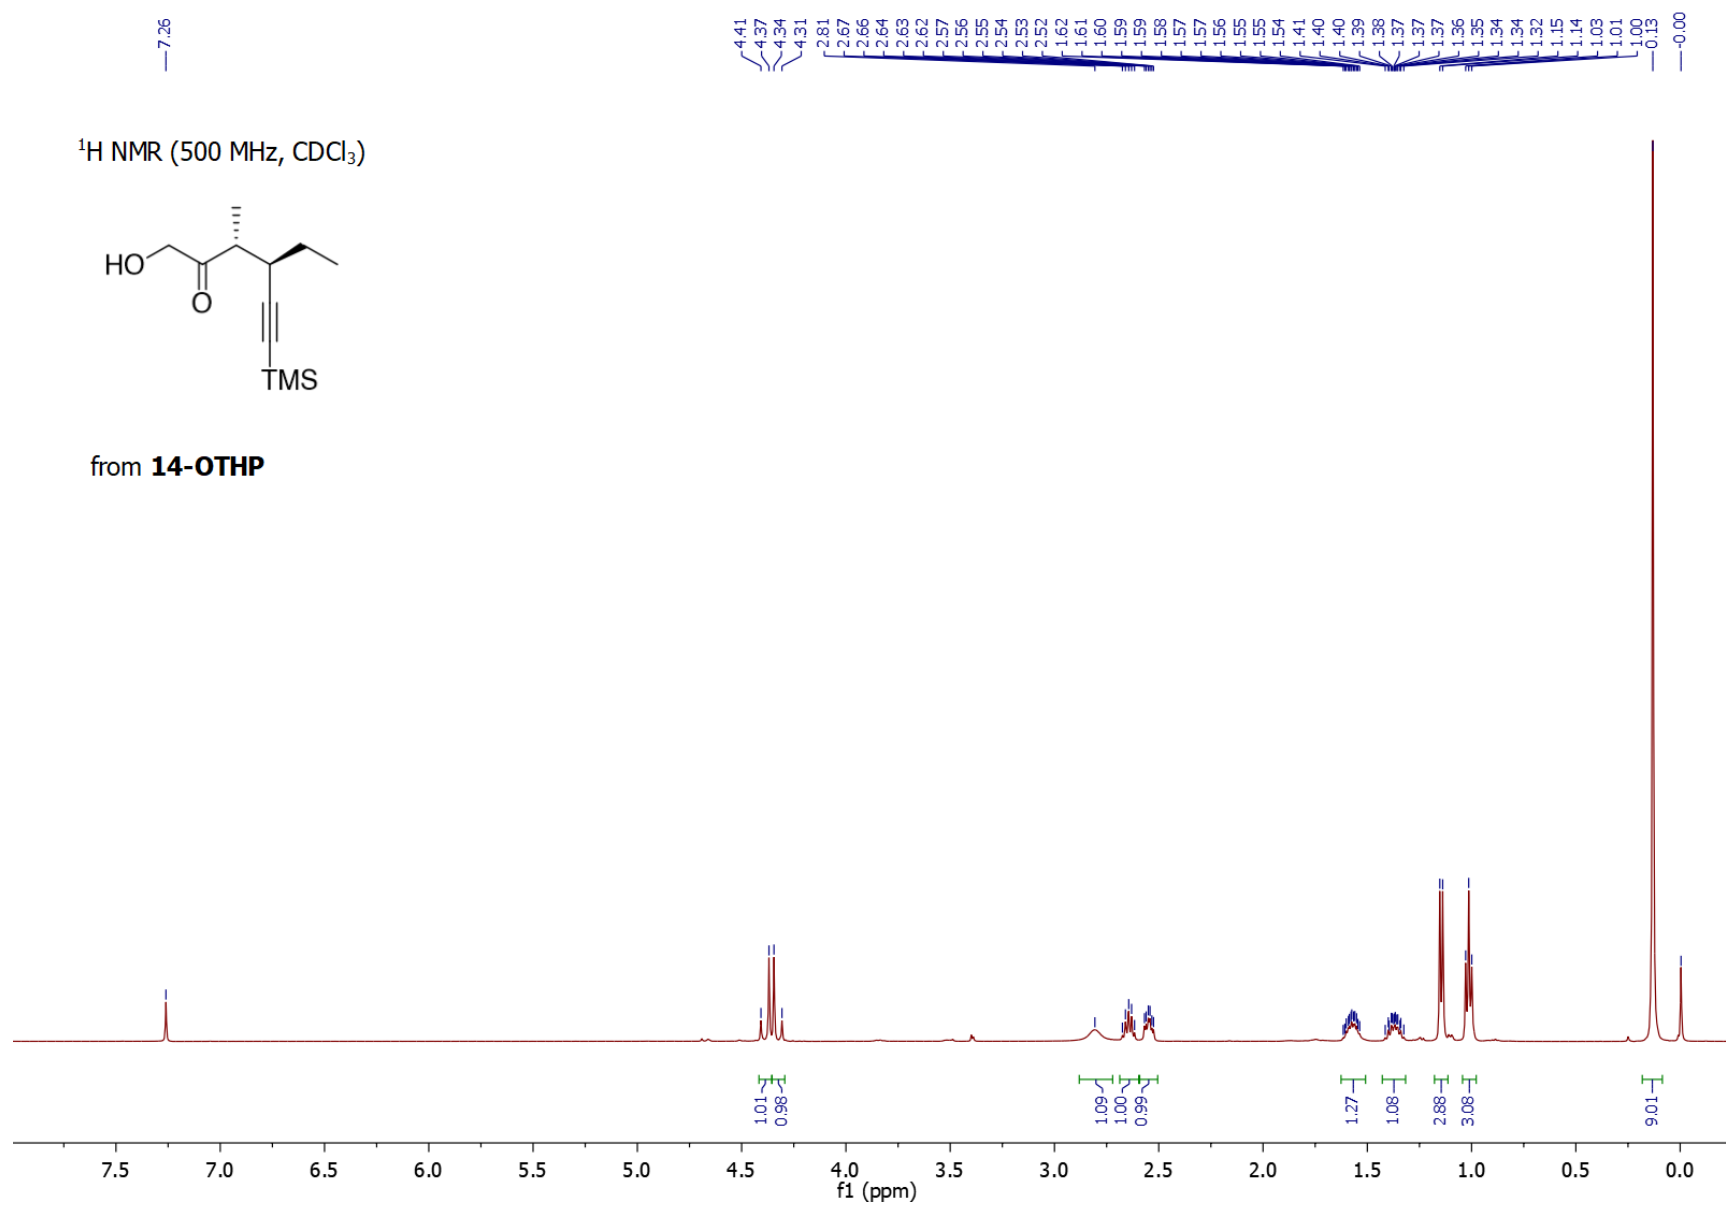

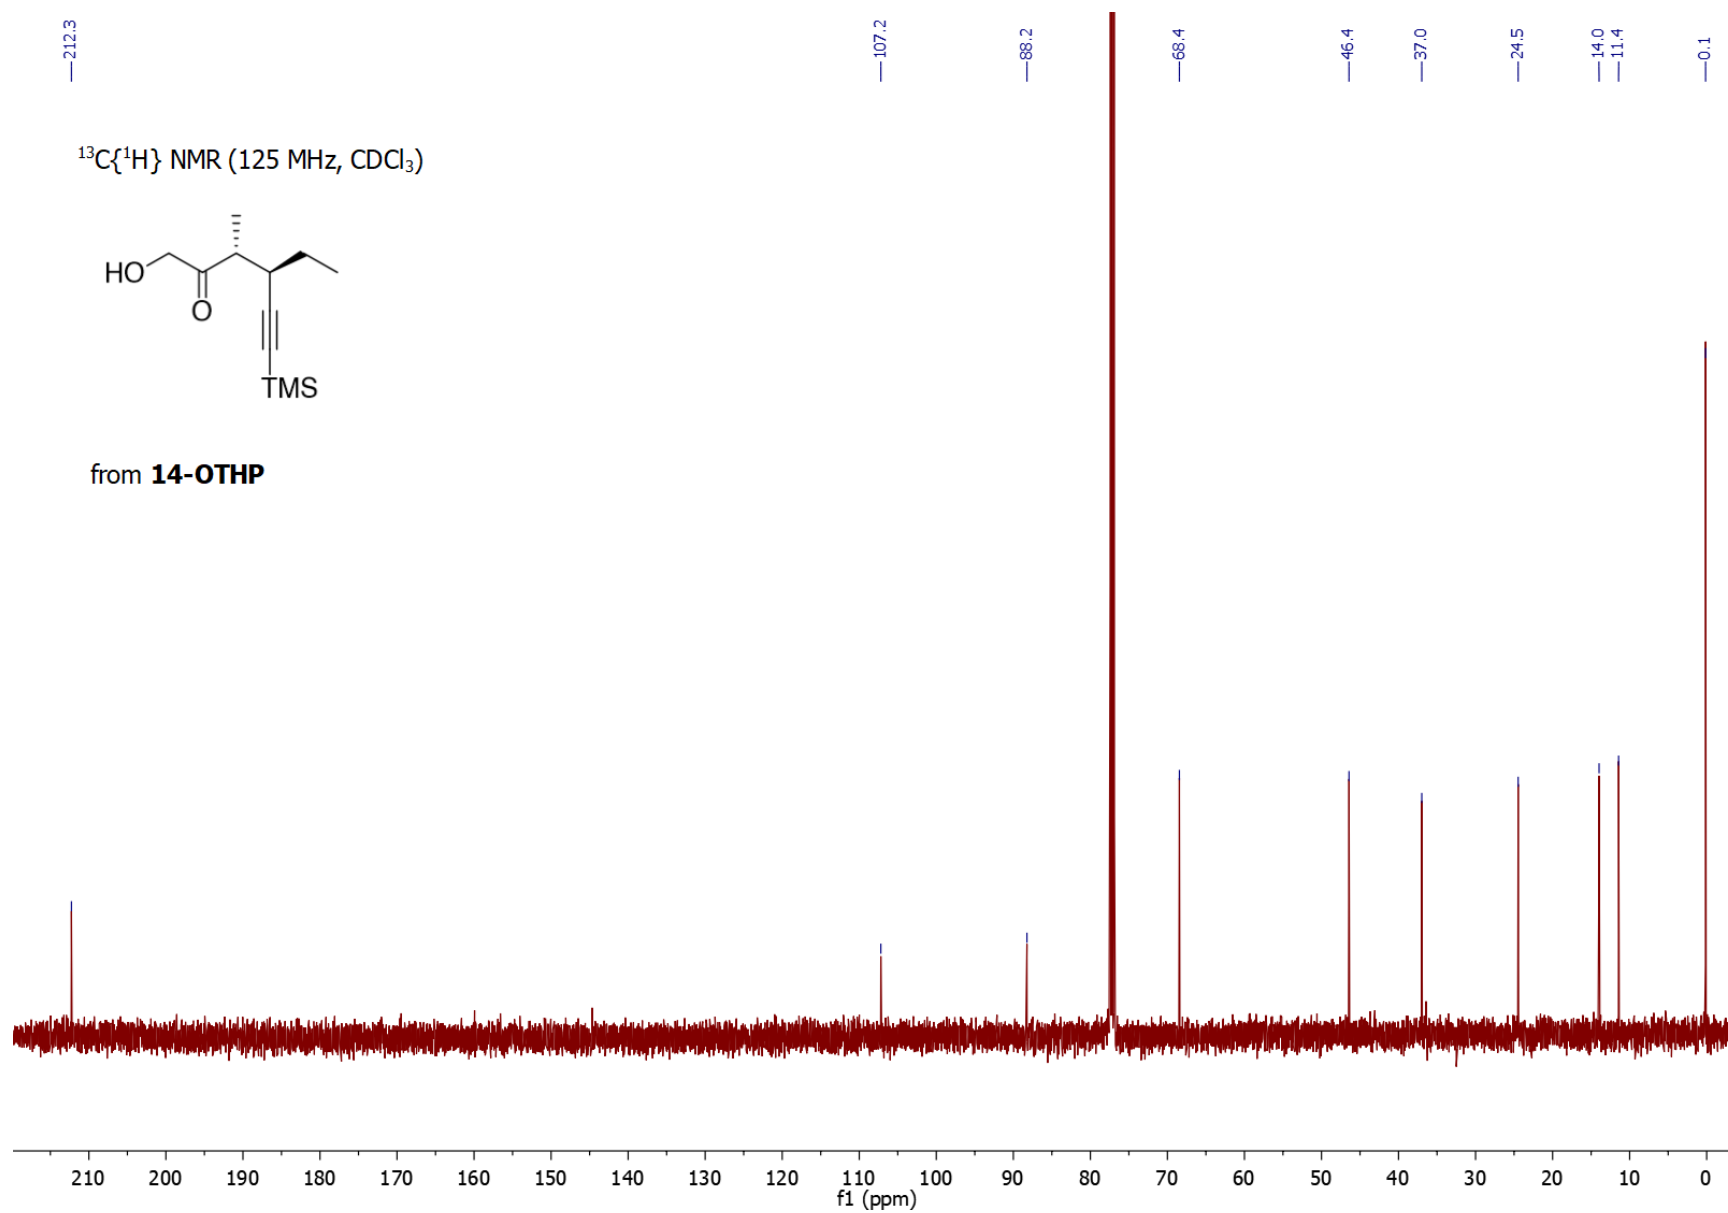

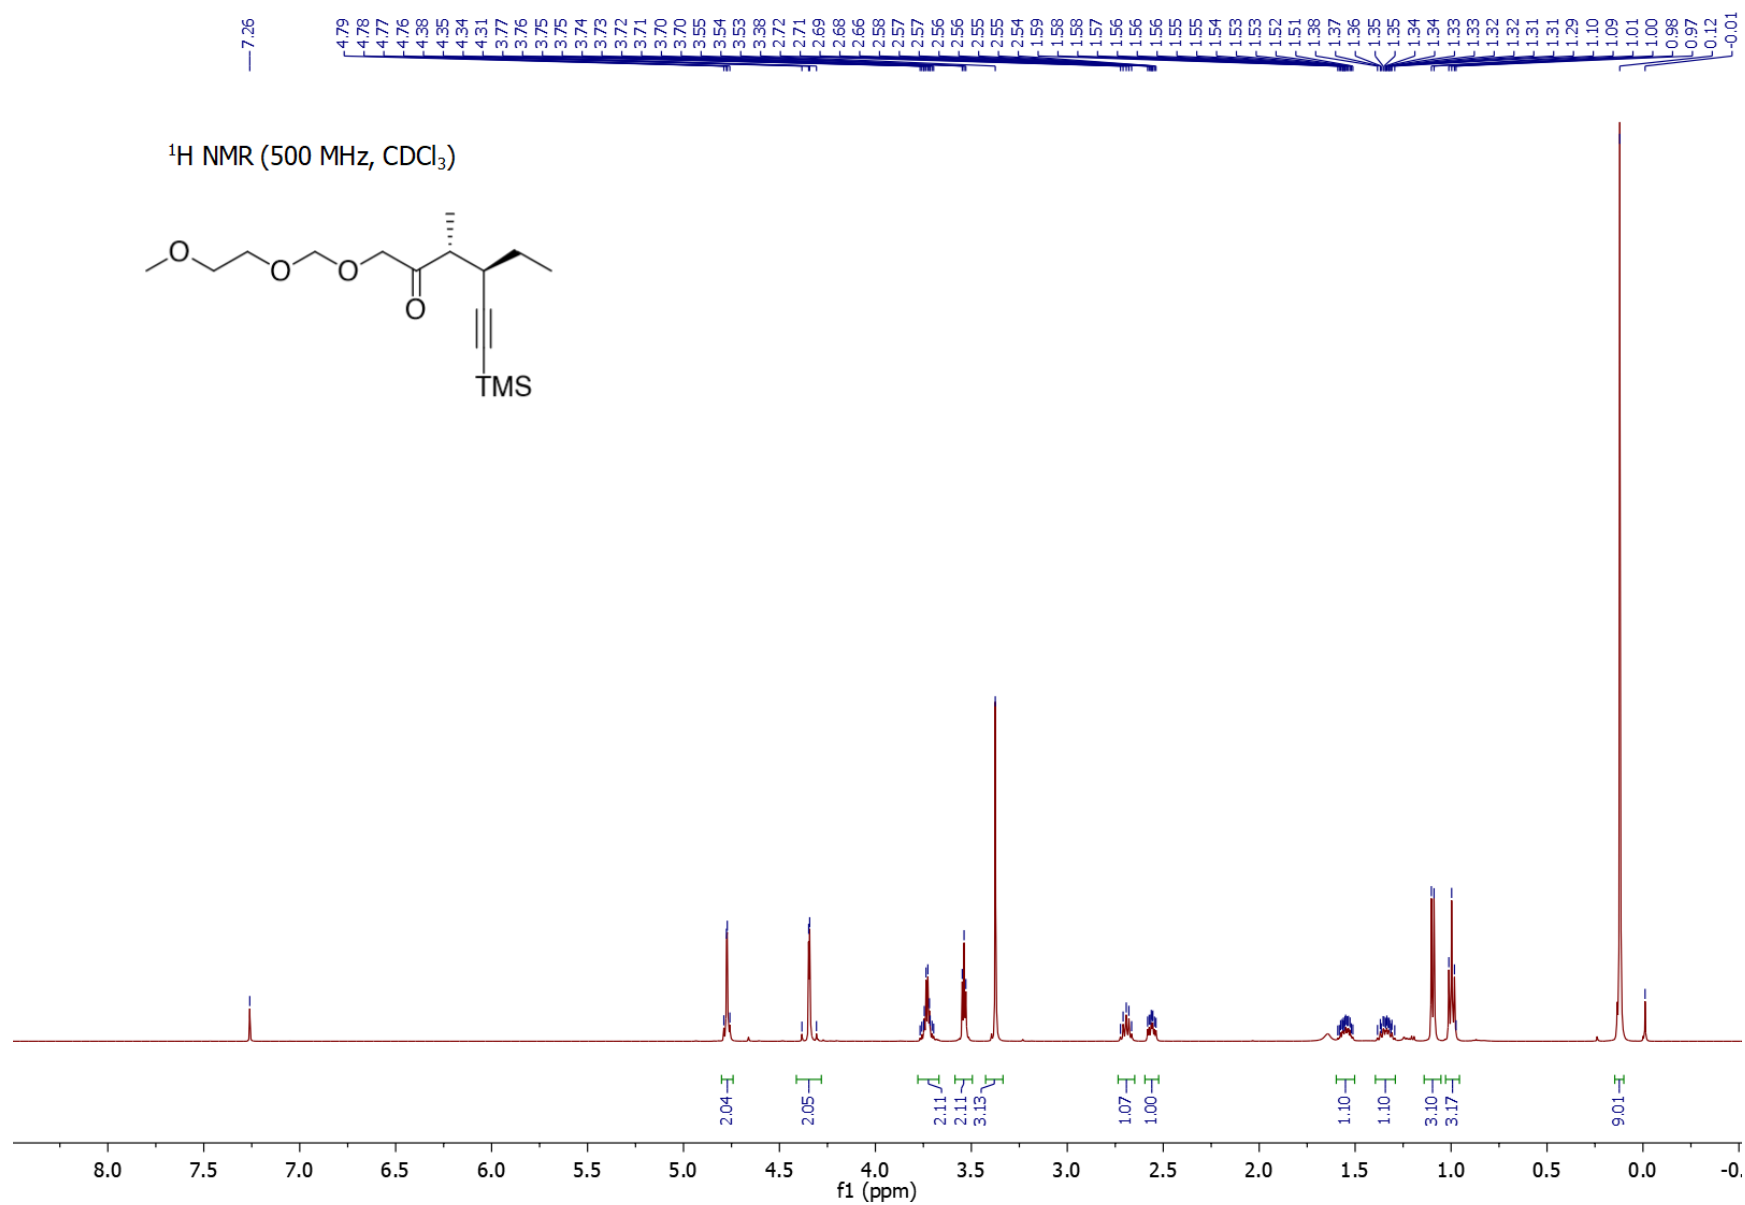



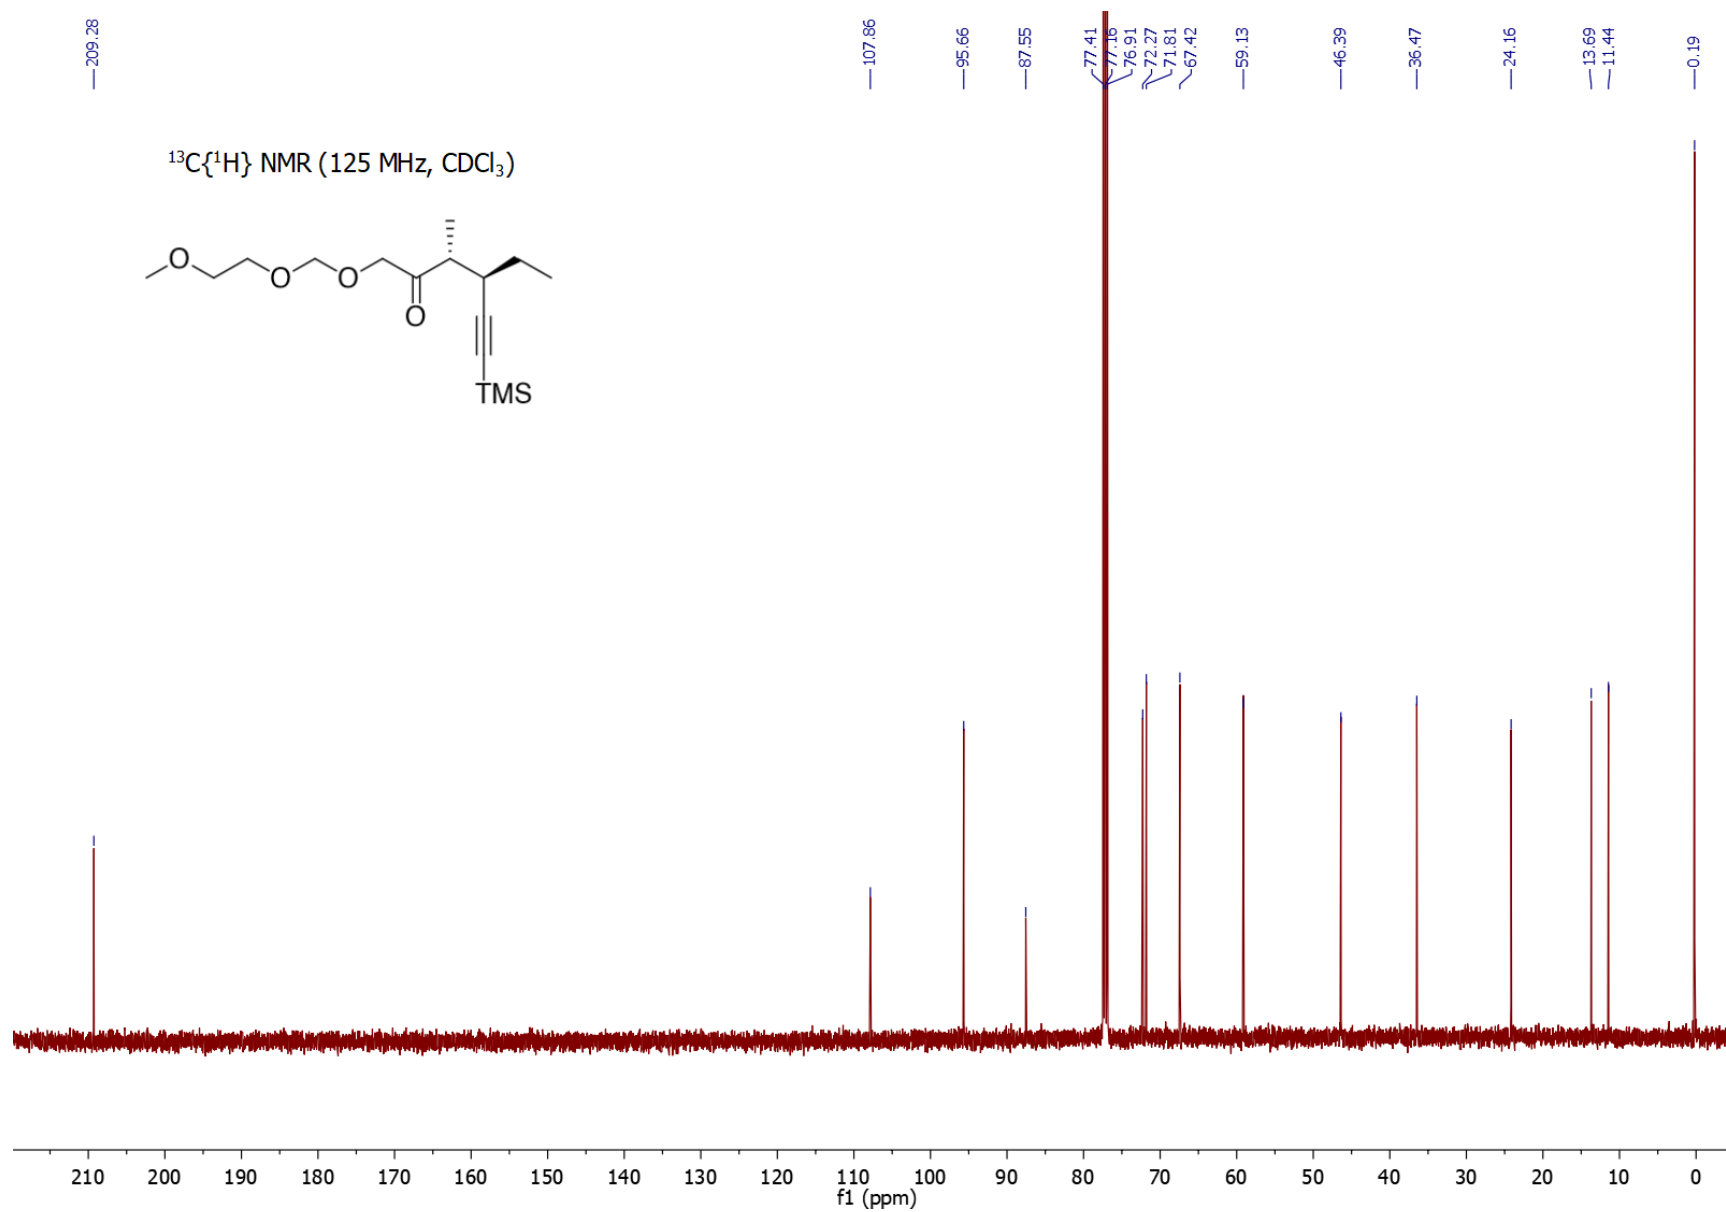

— 7.26

$^1\text{H}$  NMR (500 MHz,  $\text{CDCl}_3$ )



from **14-OMEM**

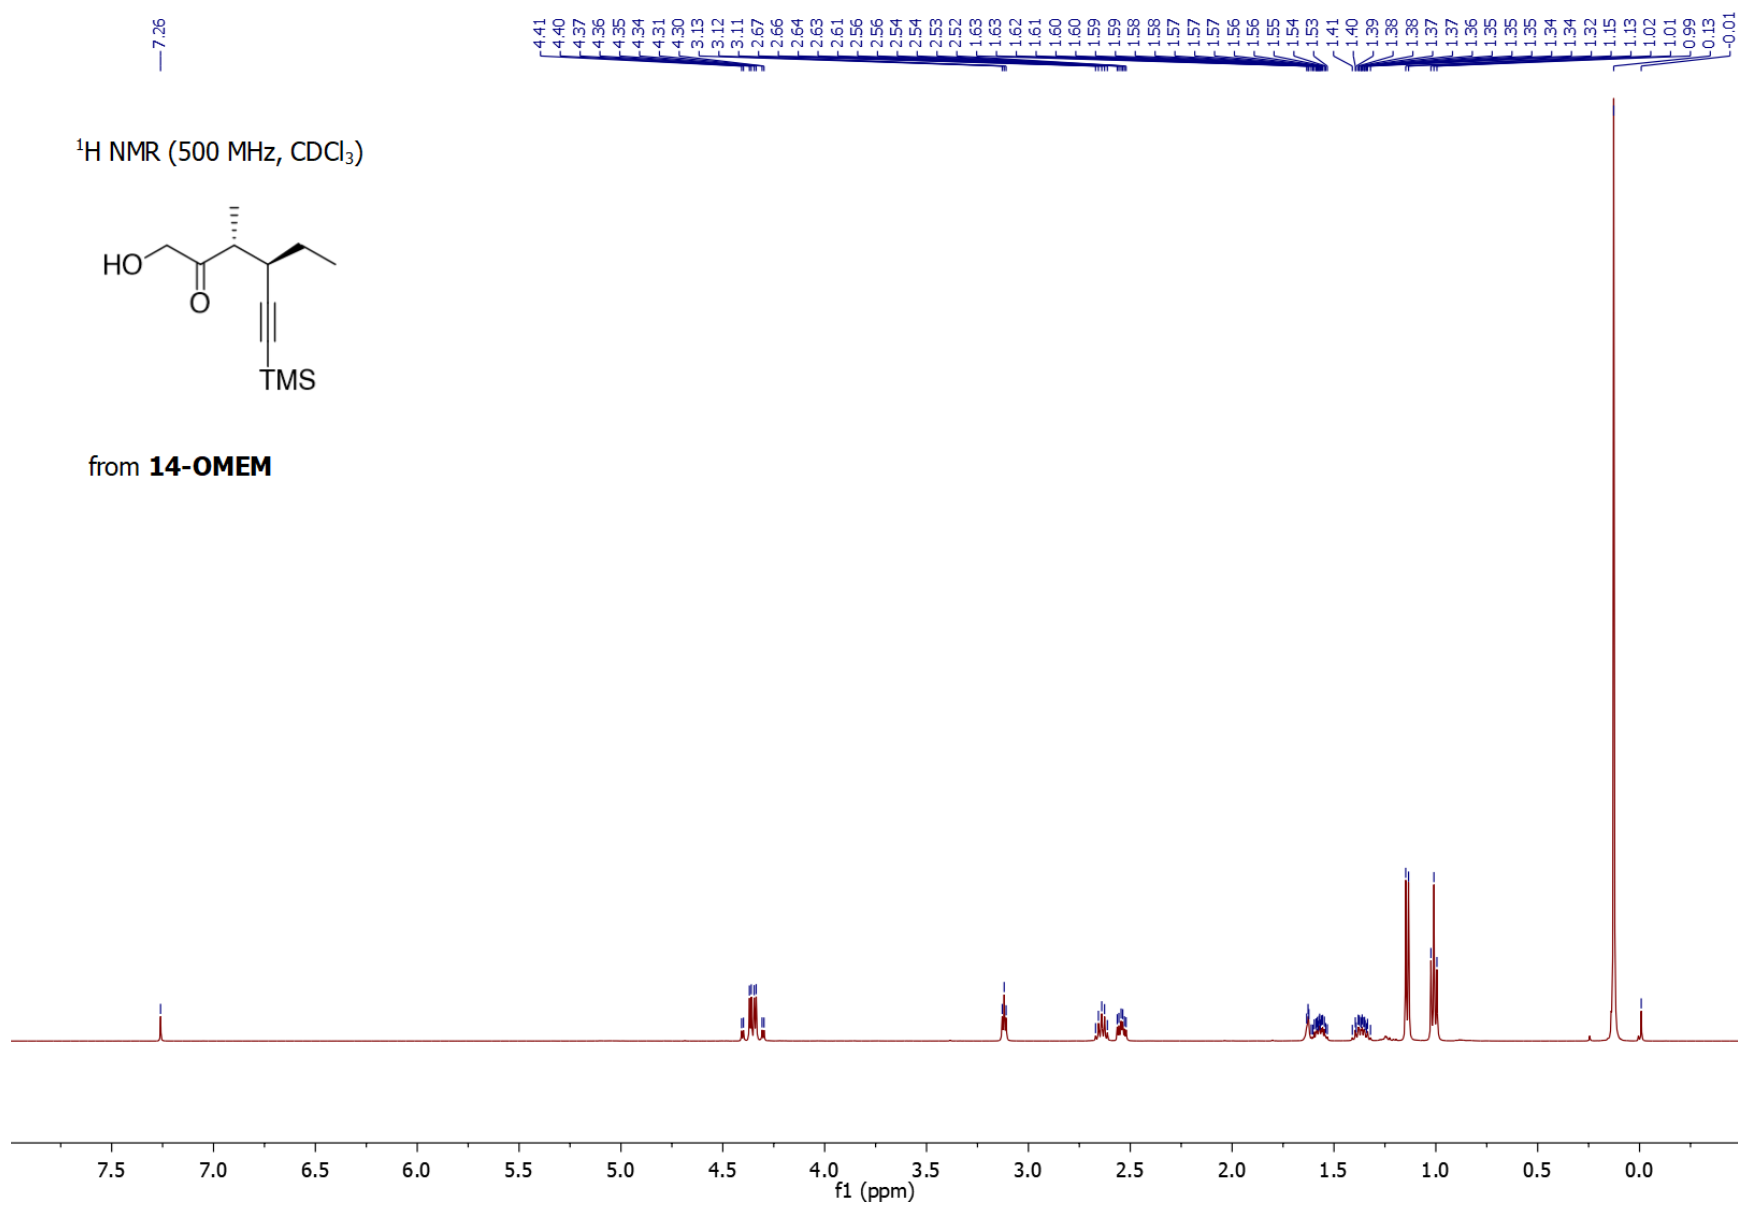

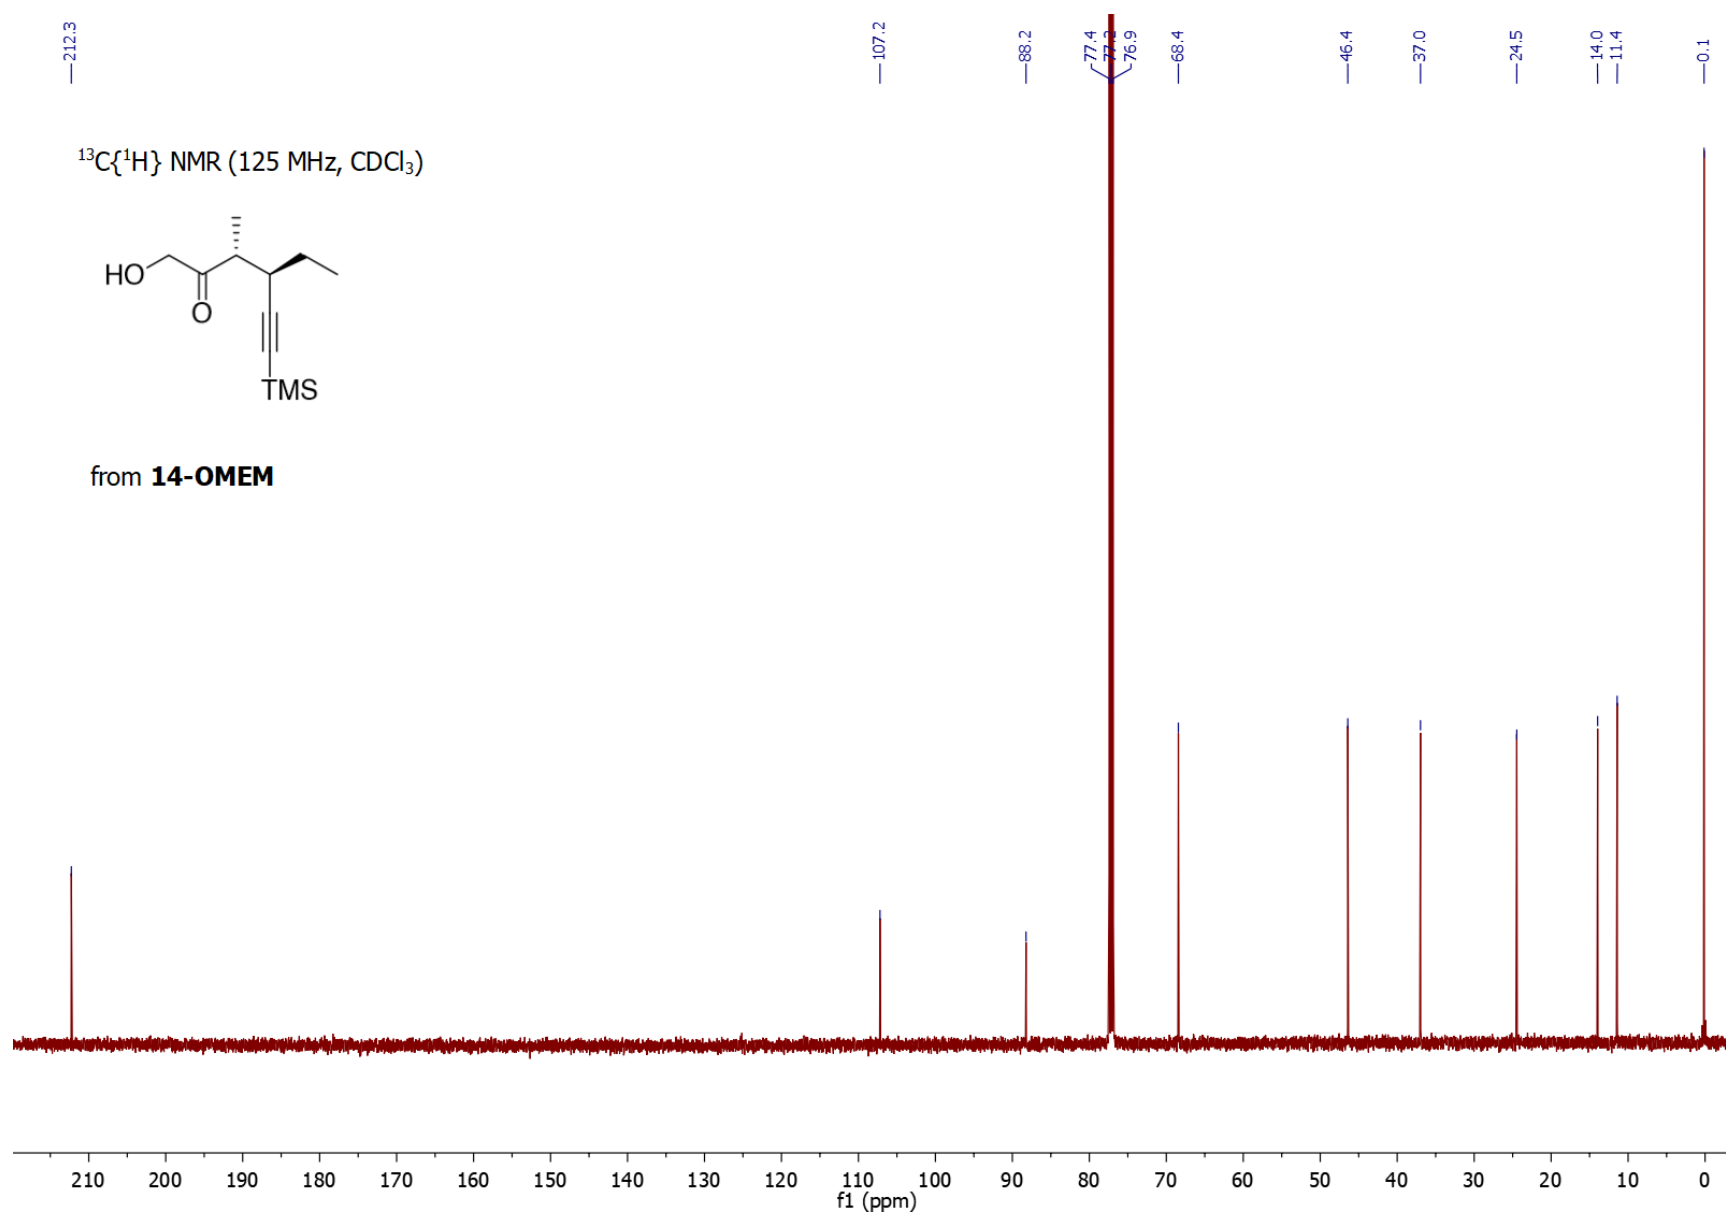

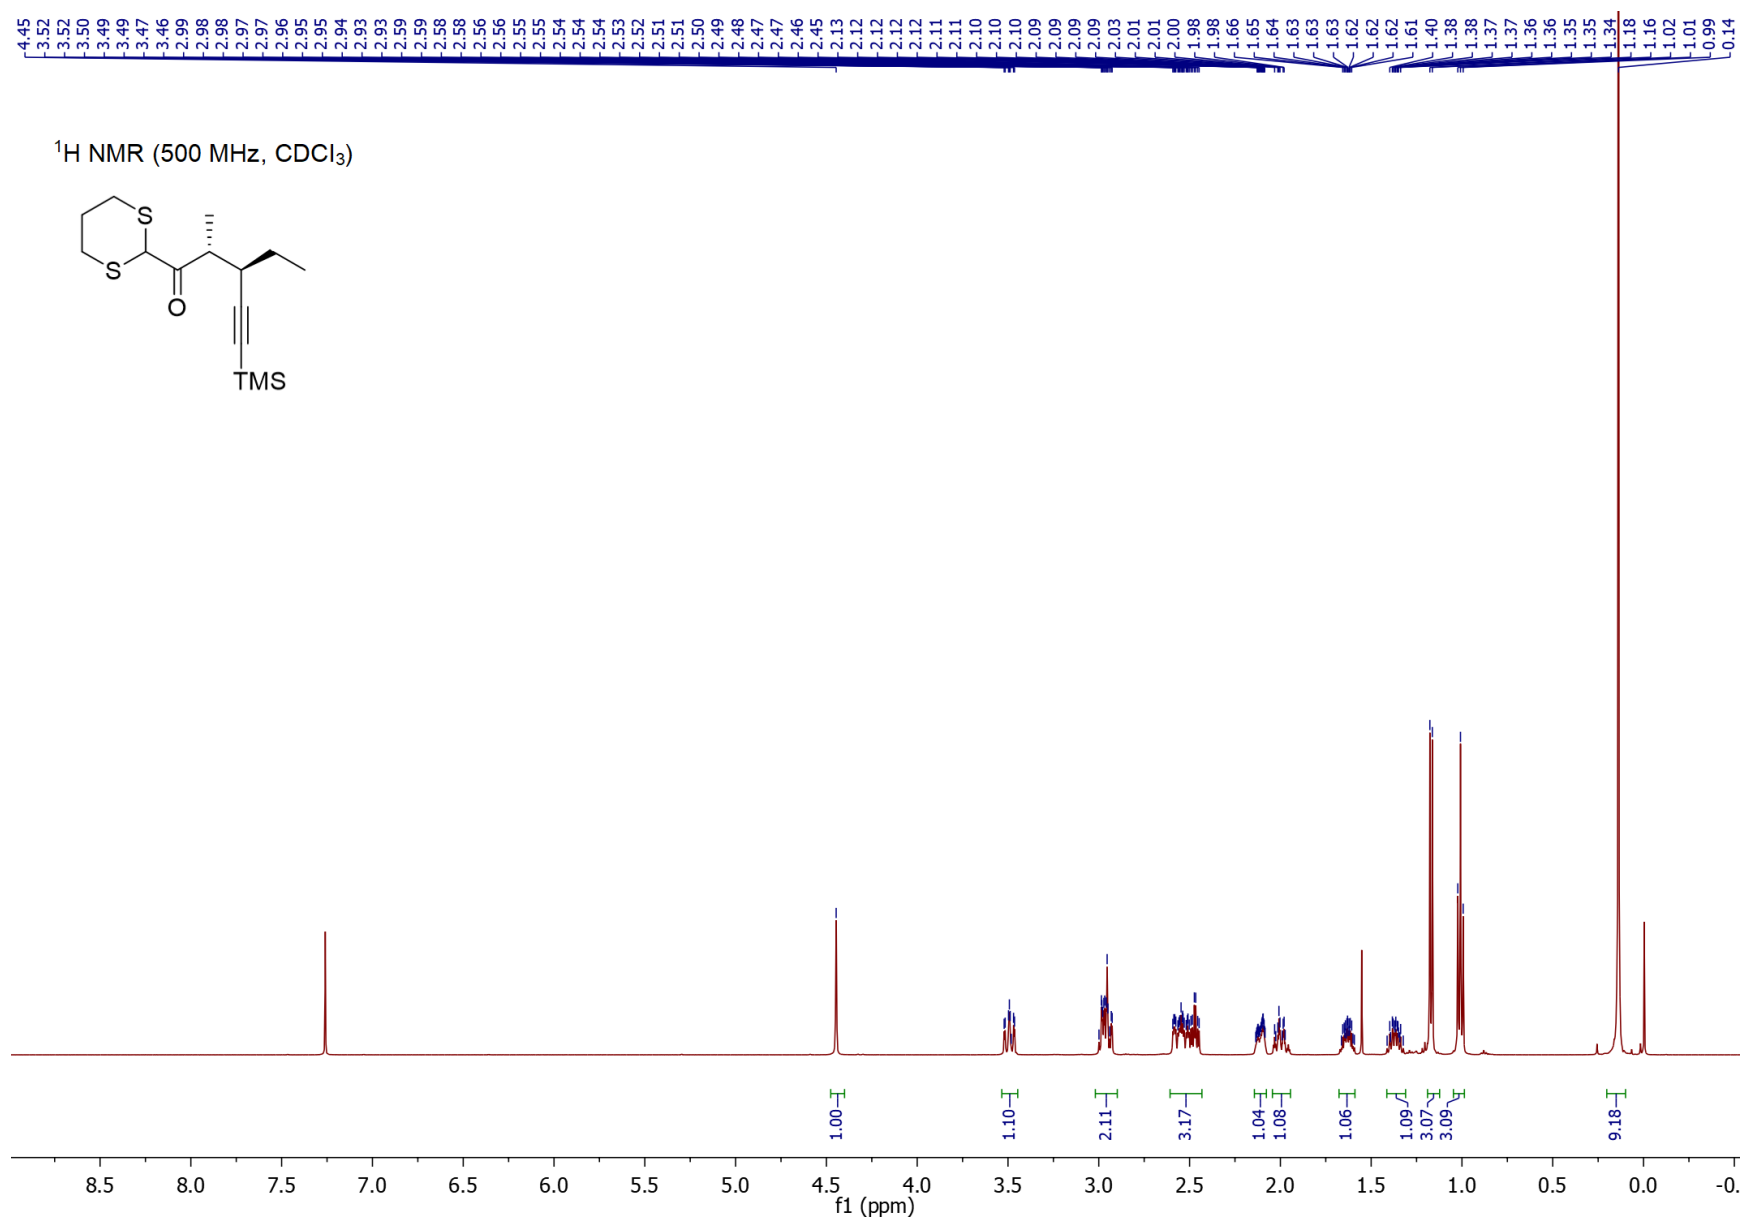

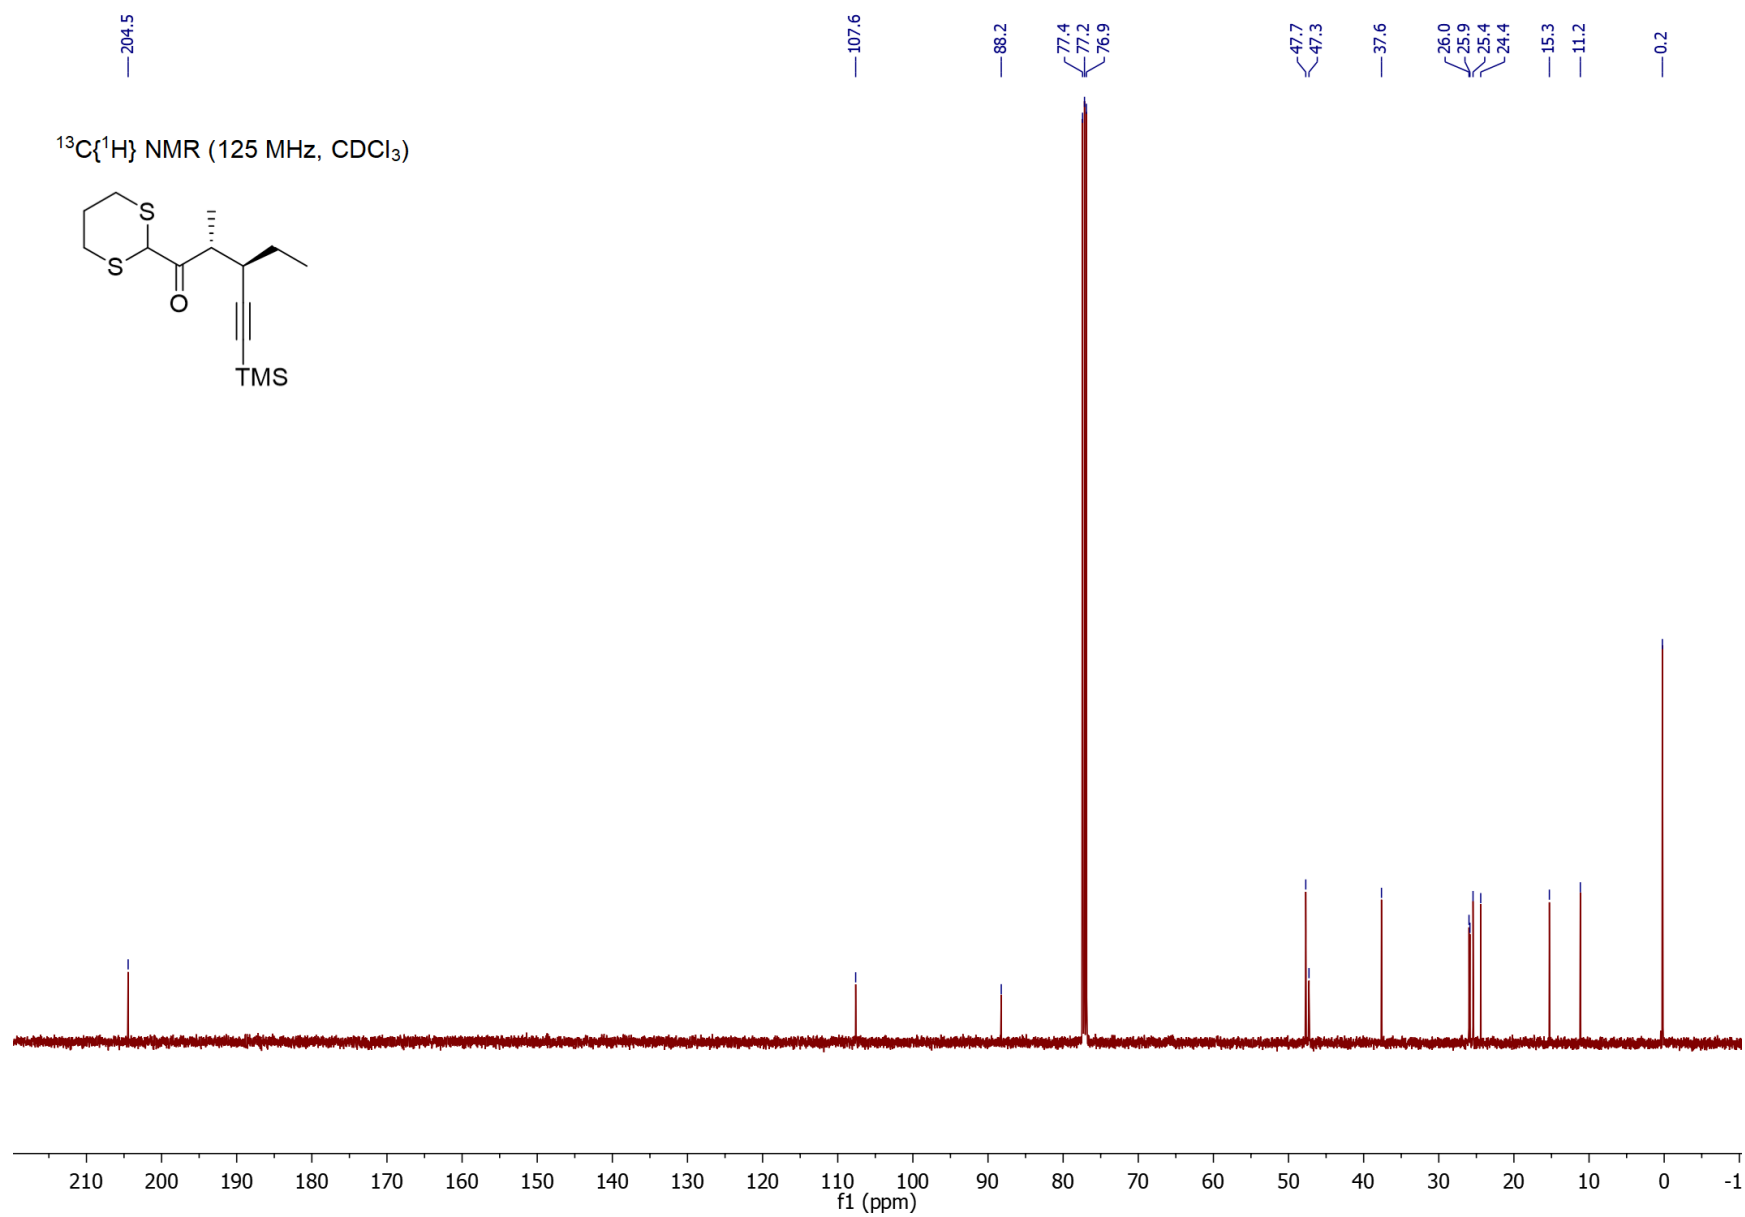



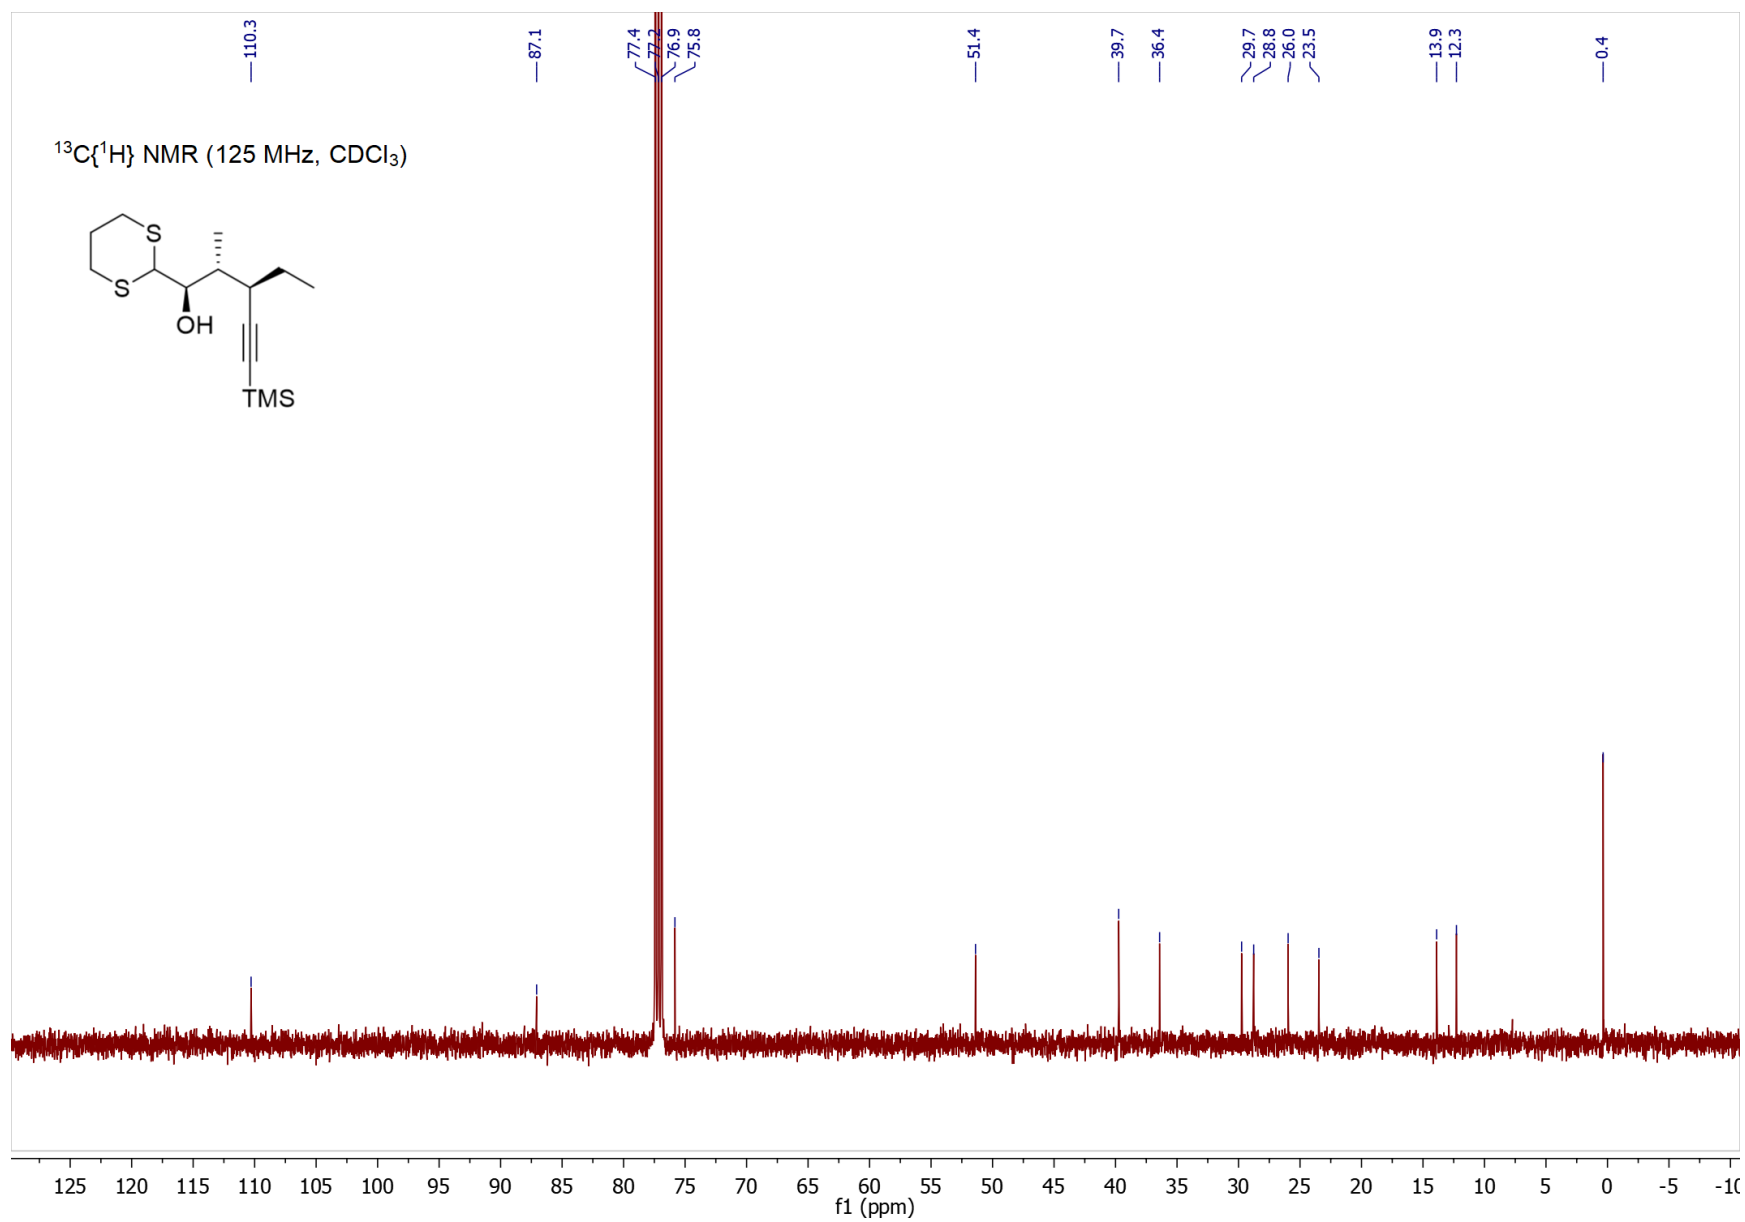

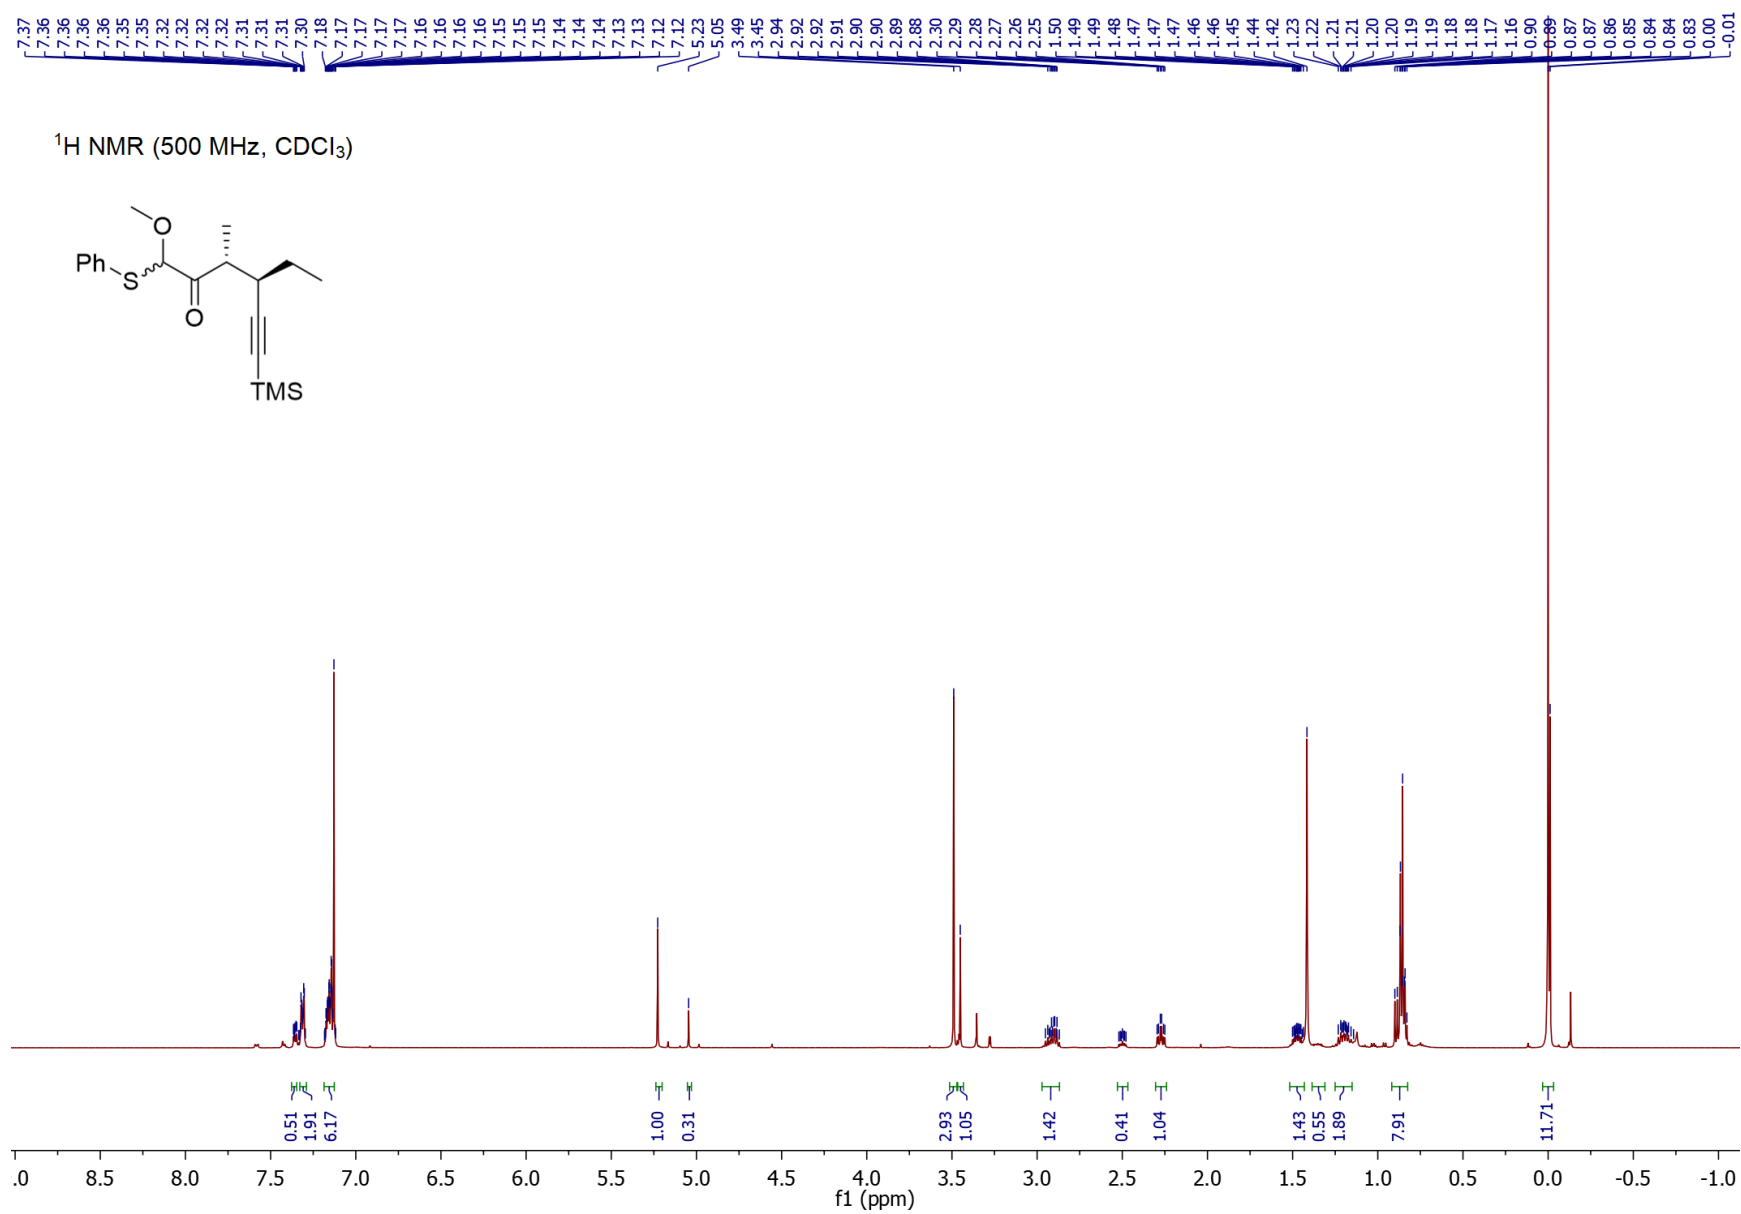



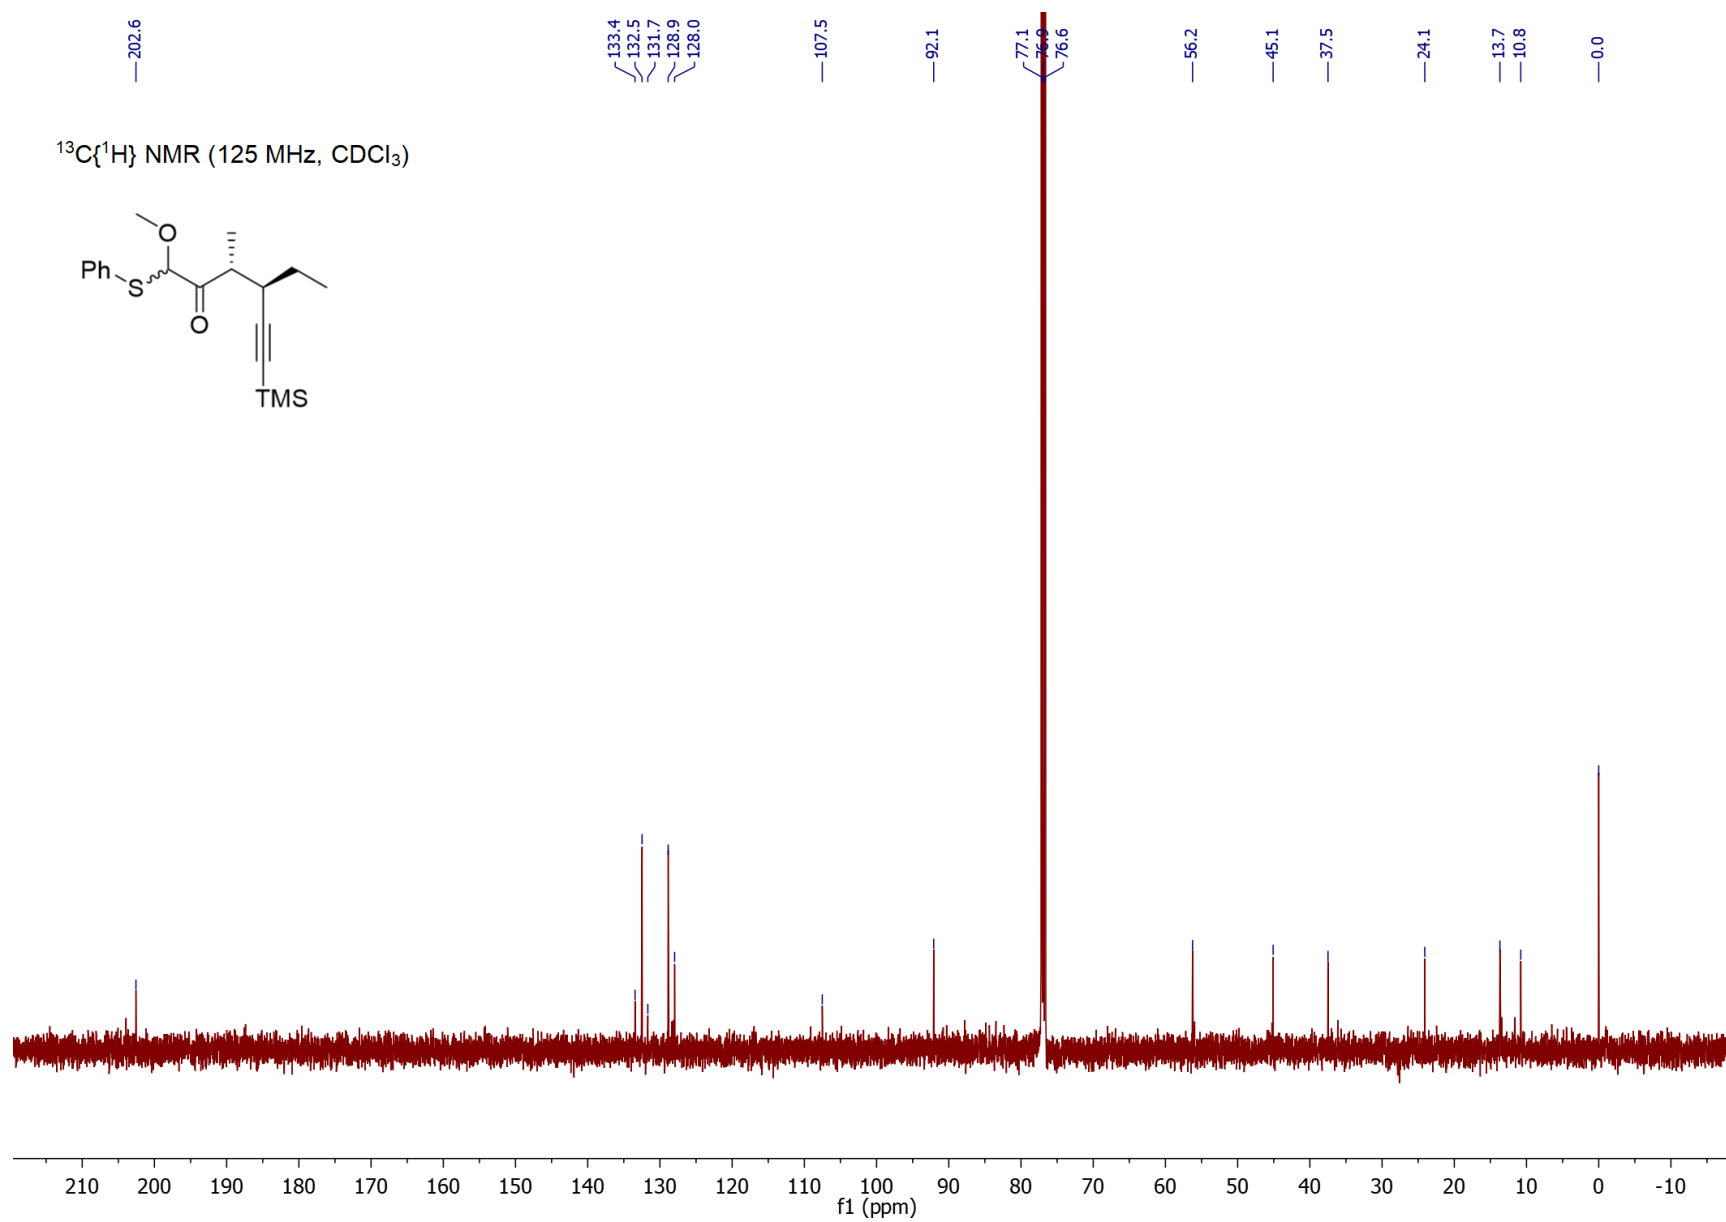

<sup>1</sup>H NMR (500 MHz, CDCl<sub>3</sub>)

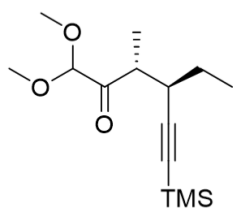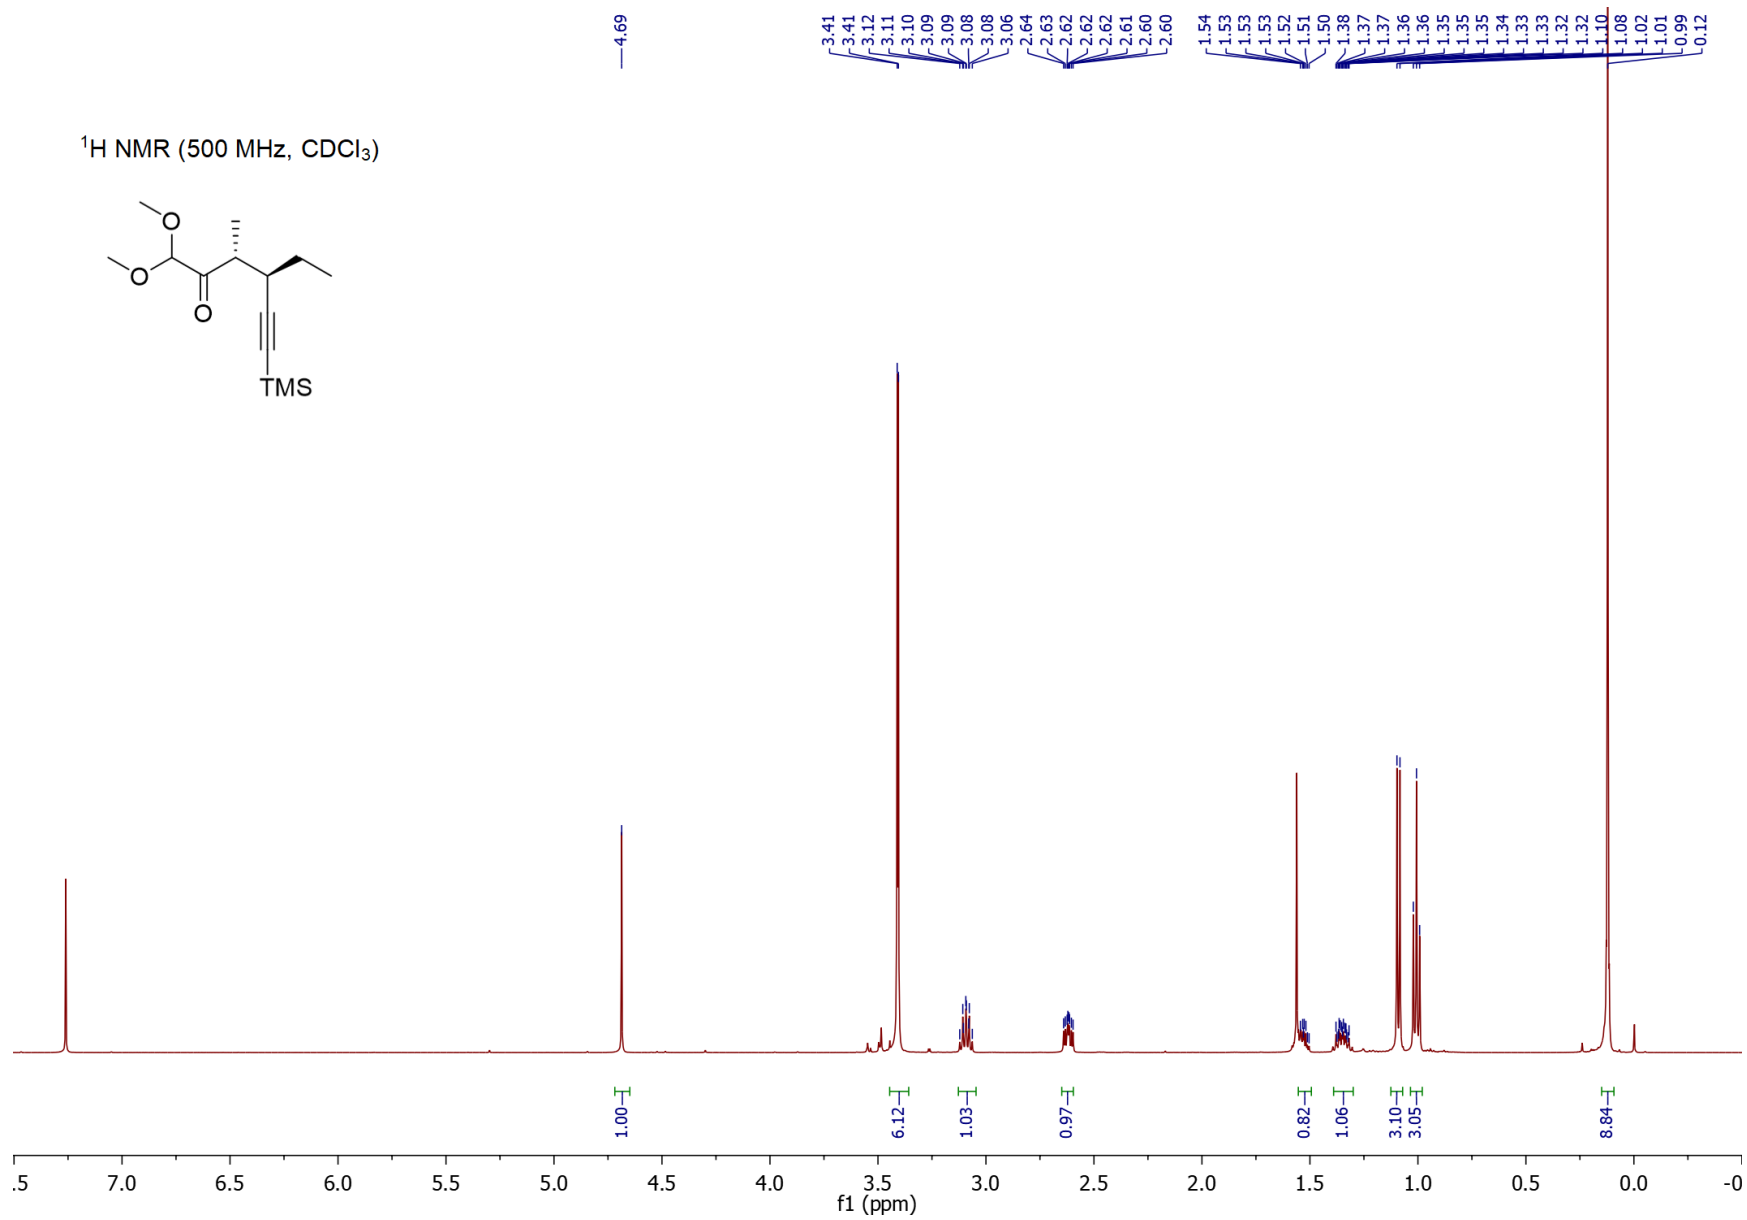

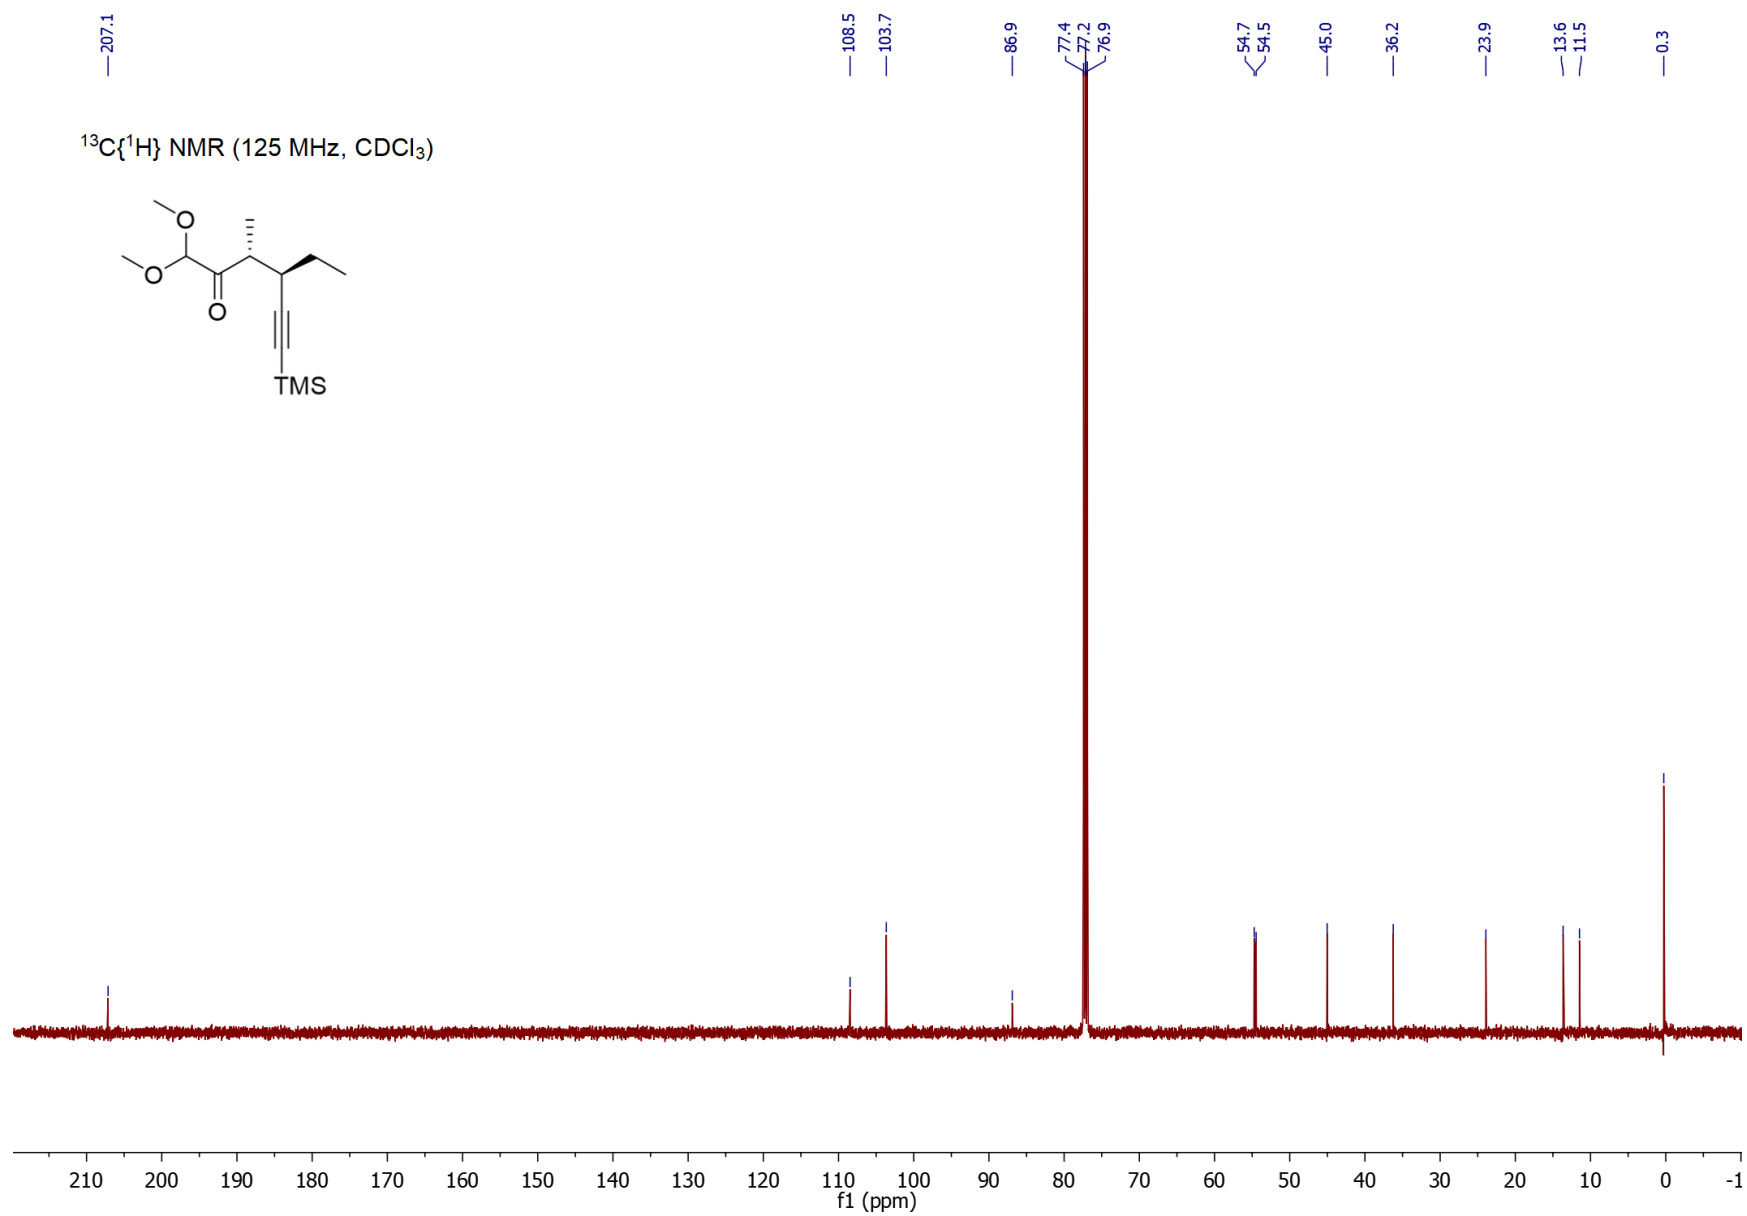

7.67  
7.66  
7.44  
7.44  
7.44  
7.43  
7.43  
7.42  
7.42  
7.41  
7.41  
7.40  
7.39  
7.39  
7.37  
7.36

3.71  
3.69  
3.68

2.82  
2.63  
2.61  
2.60

1.90  
1.89  
1.87  
1.85  
1.84  
1.71  
1.70  
1.69  
1.68  
1.67  
1.66  
1.64  
1.06

0.01

$^1\text{H}$  NMR (500 MHz,  $\text{CDCl}_3$ )

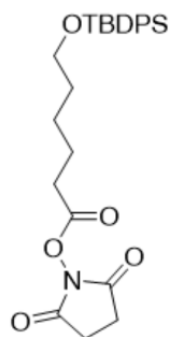

via method A

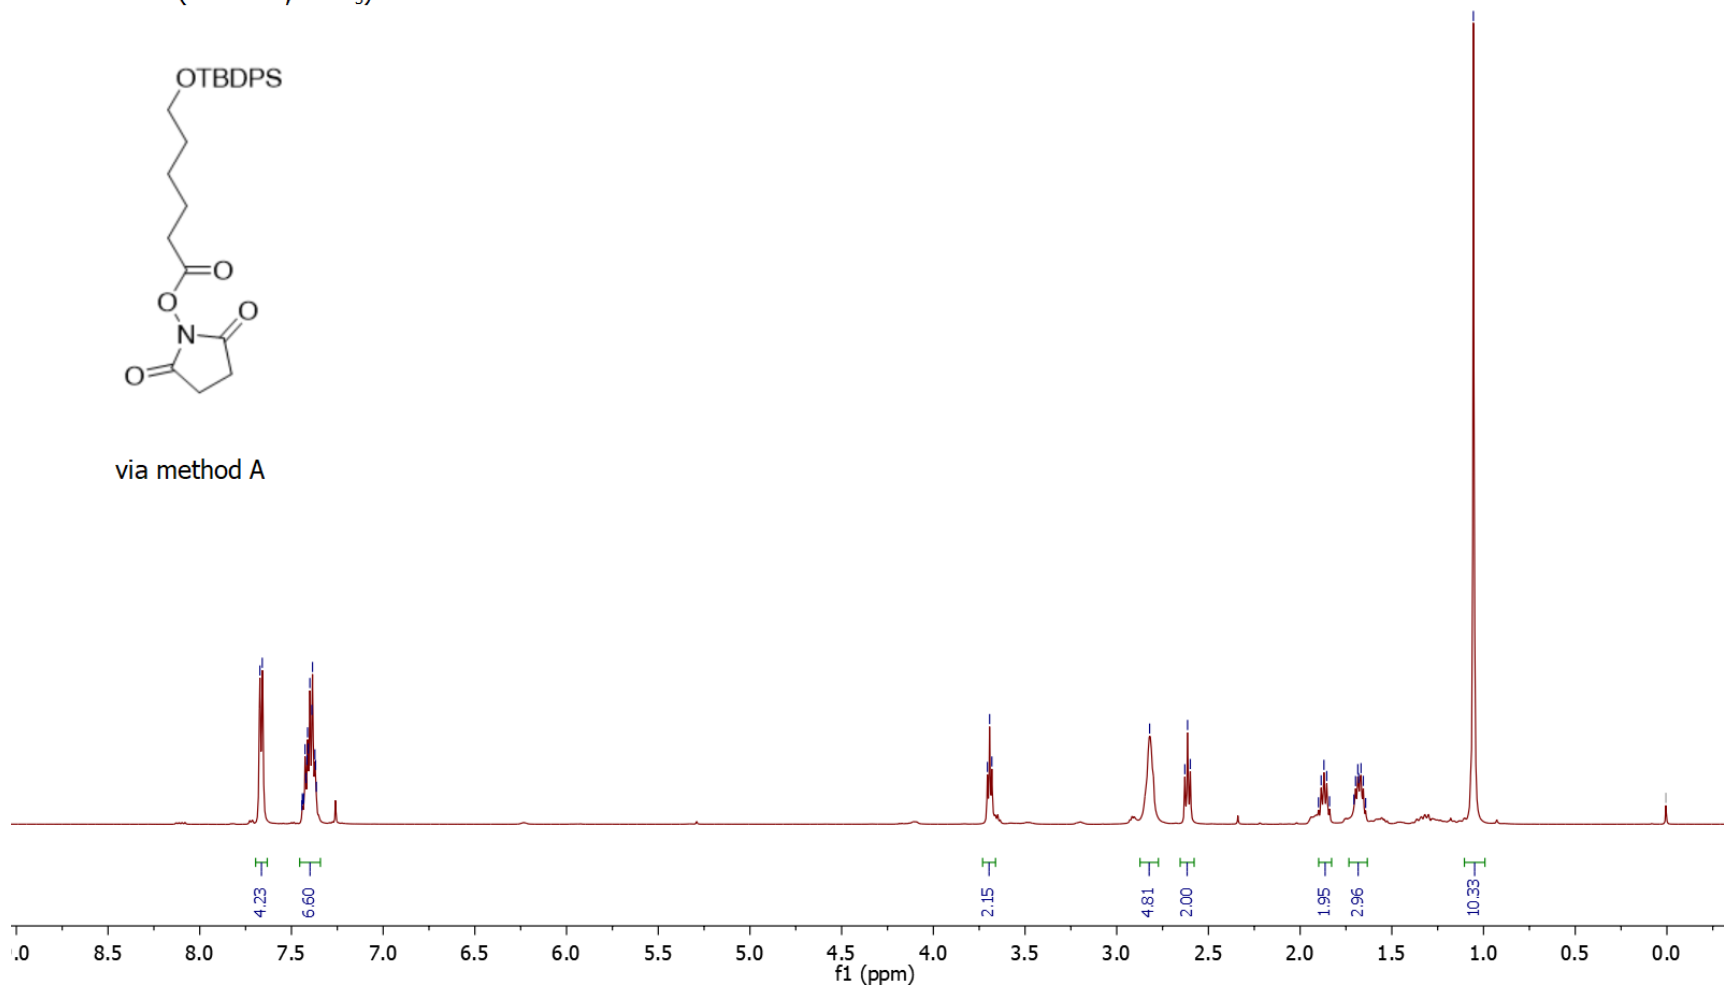

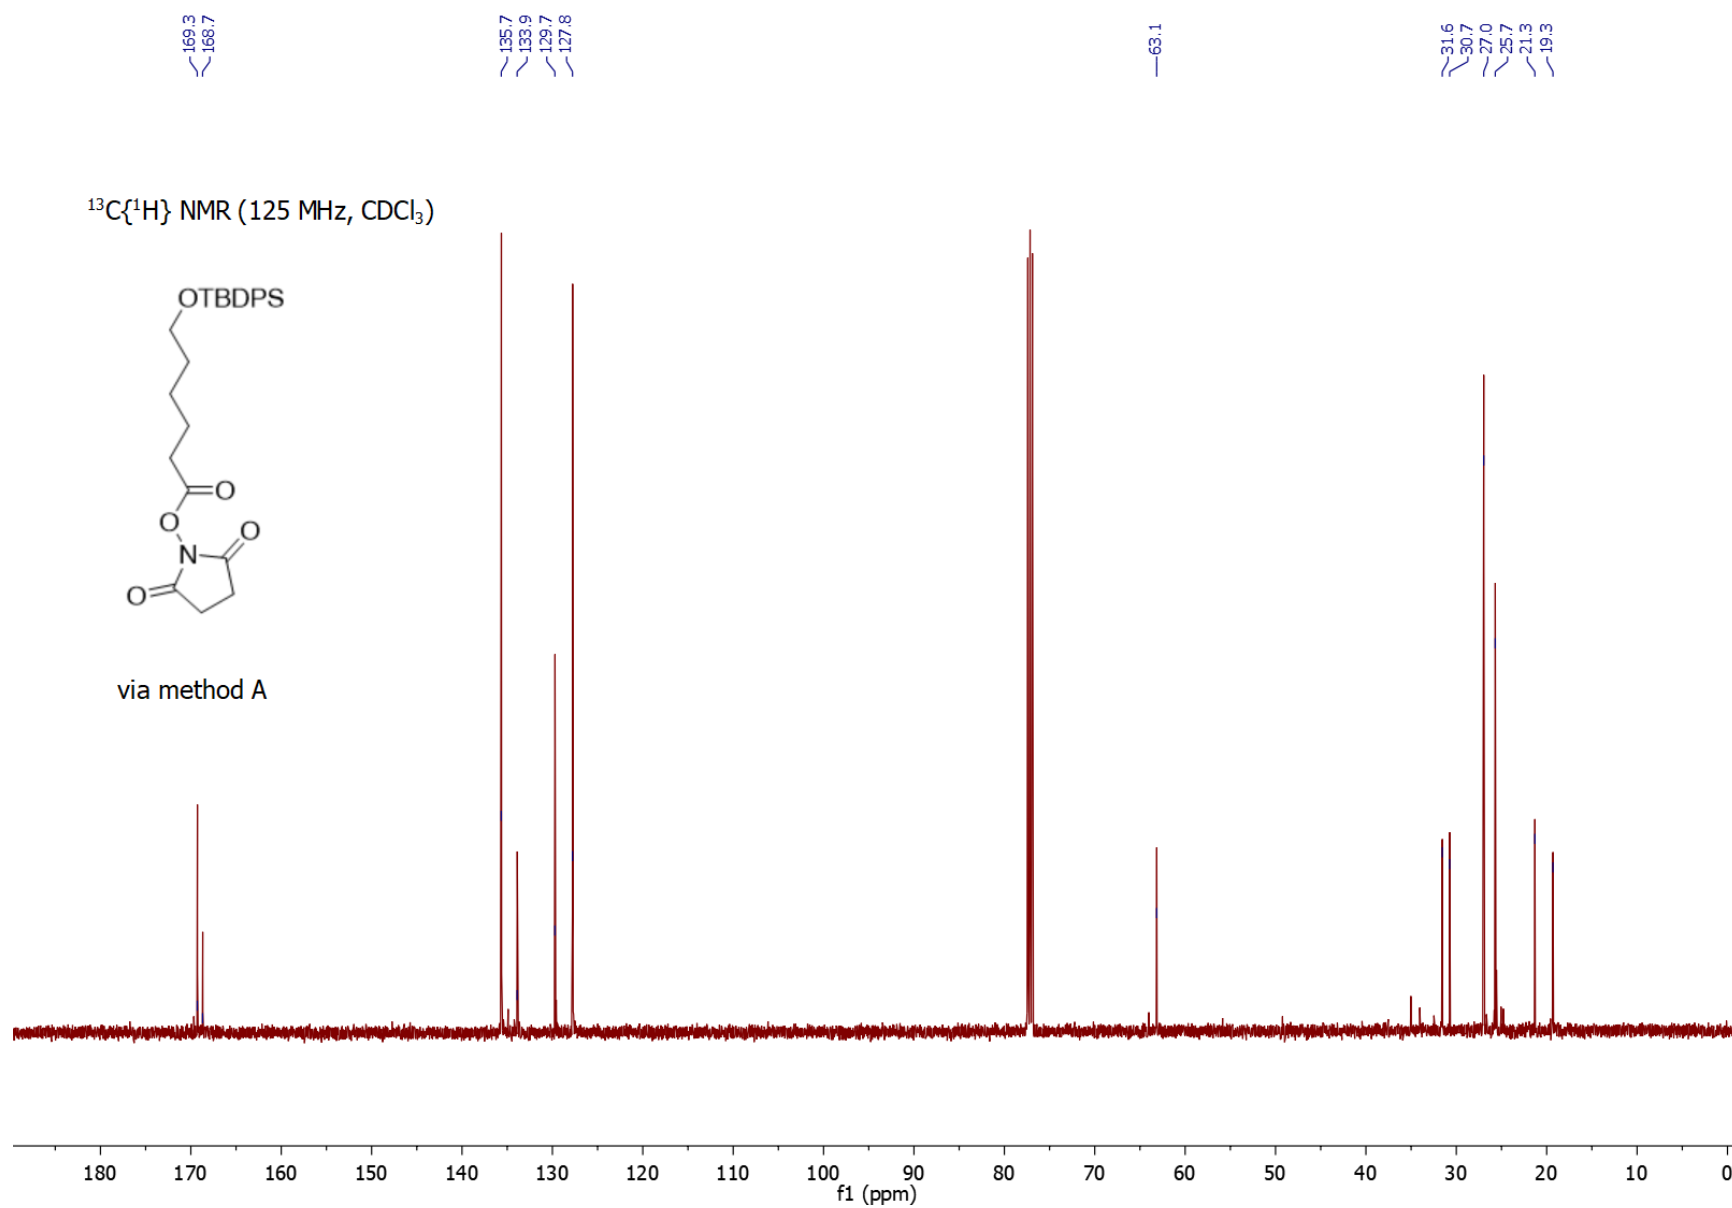

7.68  
7.67  
7.67  
7.66  
7.66  
7.65  
7.44  
7.44  
7.43  
7.43  
7.42  
7.42  
7.41  
7.41  
7.40  
7.39  
7.38  
7.37  
7.37

3.70  
3.69  
3.68

2.83  
2.63  
2.61  
2.60  
1.90  
1.88  
1.87  
1.85  
1.84  
1.70  
1.68  
1.68  
1.67  
1.67  
1.66  
1.65  
1.64

1.05

0.00

$^1\text{H}$  NMR (500 MHz,  $\text{CDCl}_3$ )

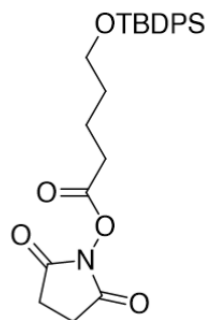

via method B

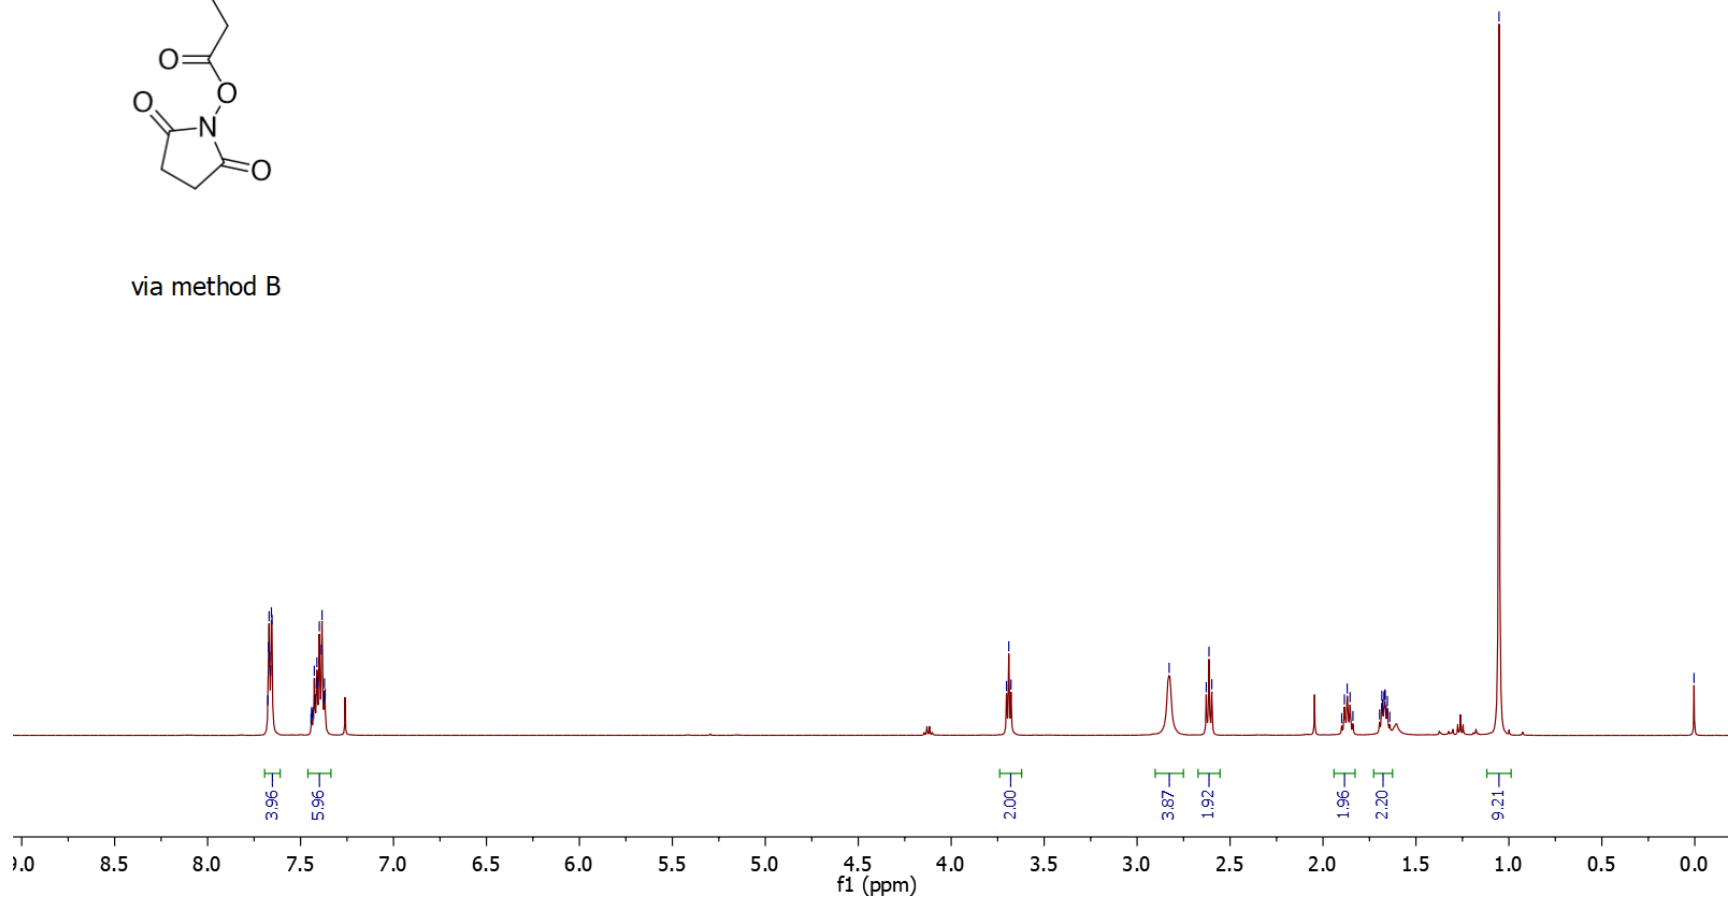

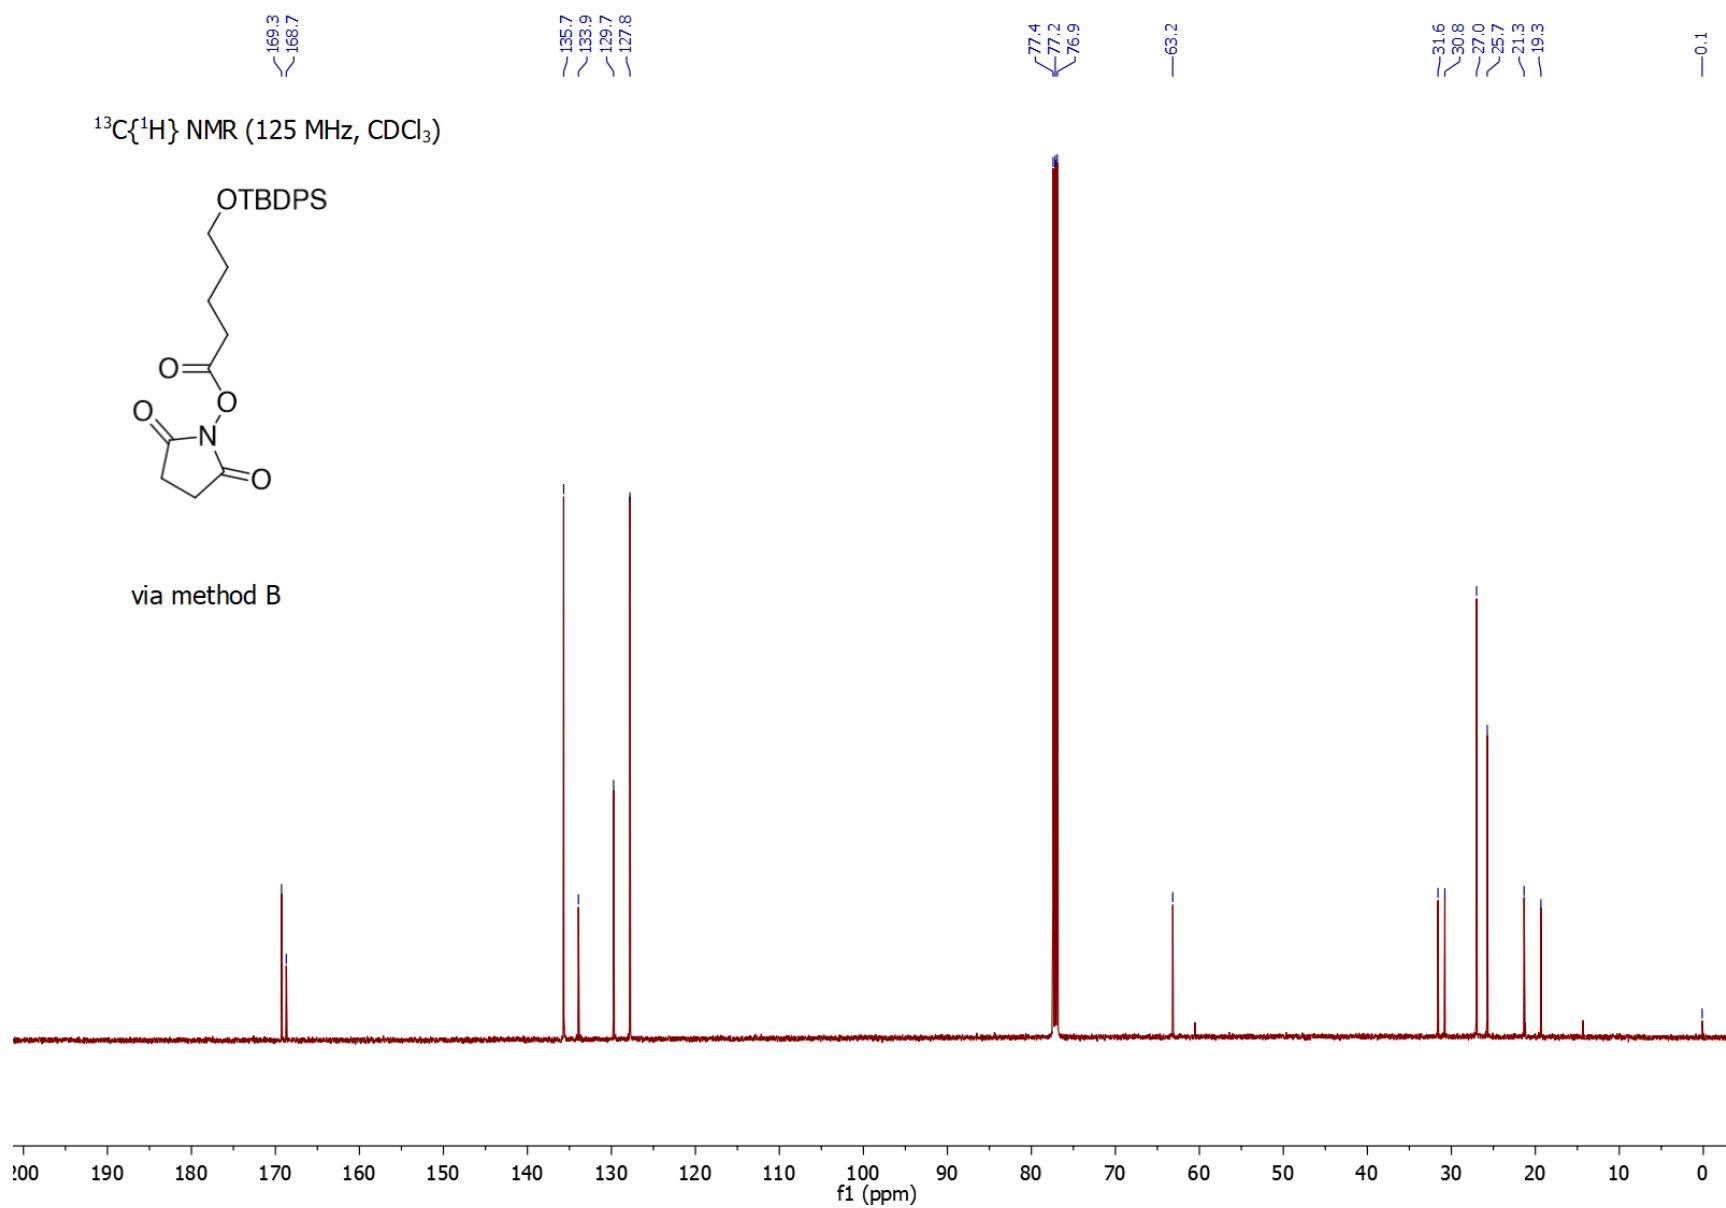

$^1\text{H}$  NMR (500 MHz,  $\text{CDCl}_3$ )

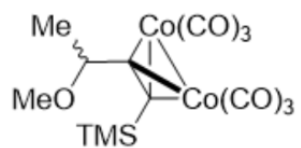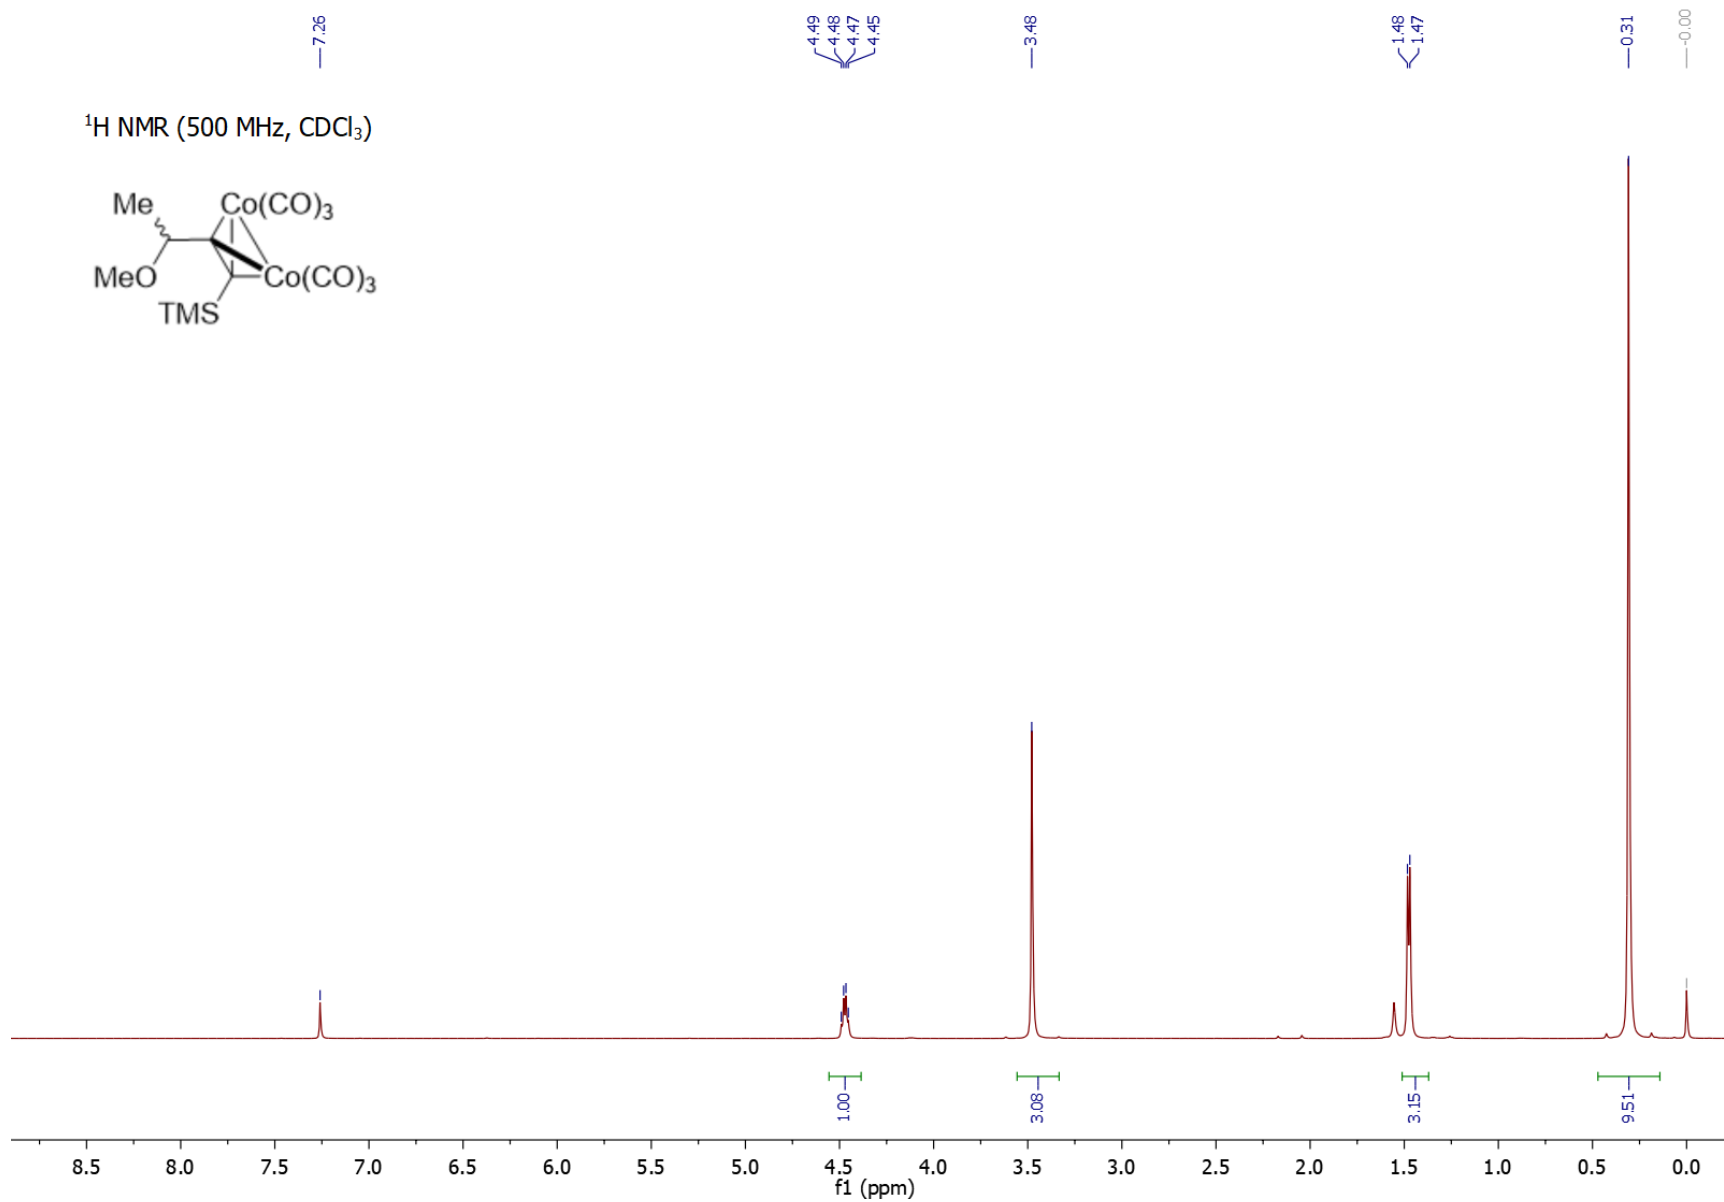





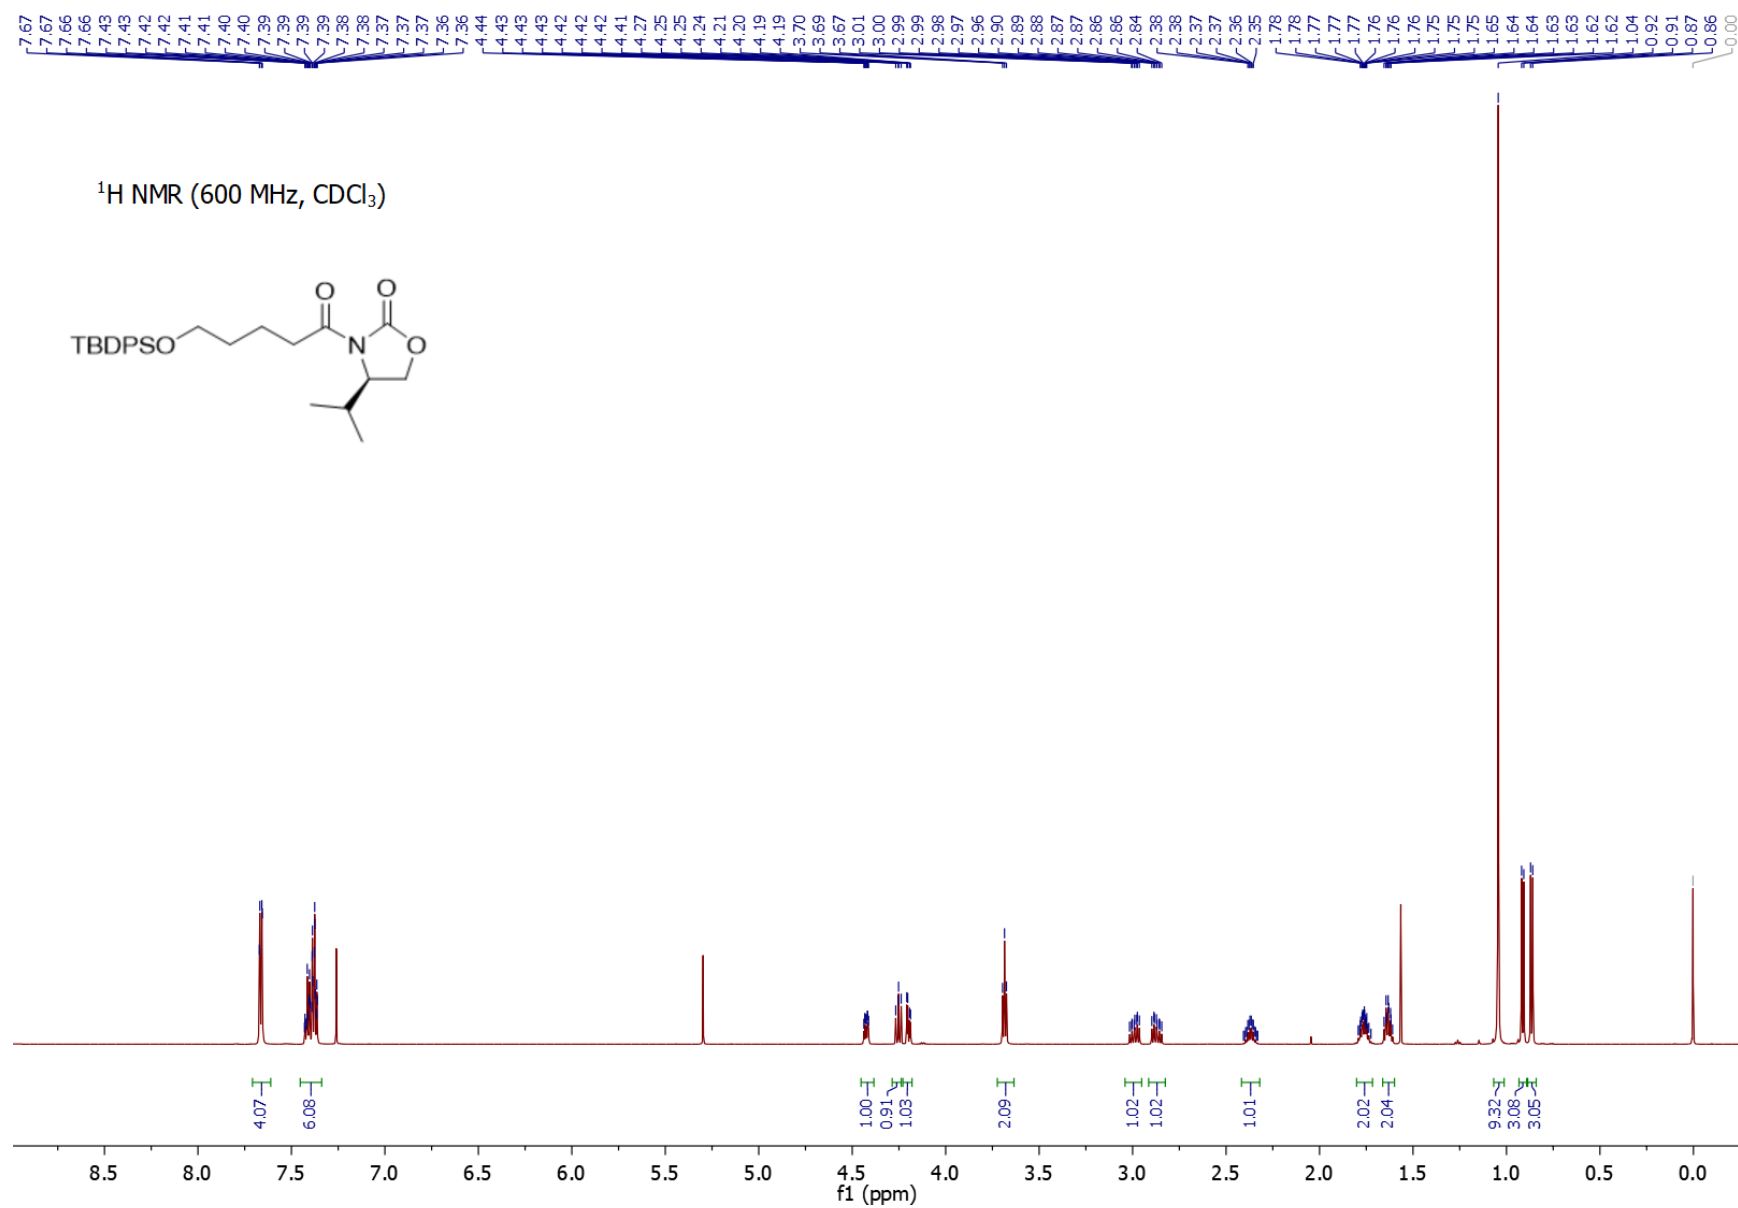

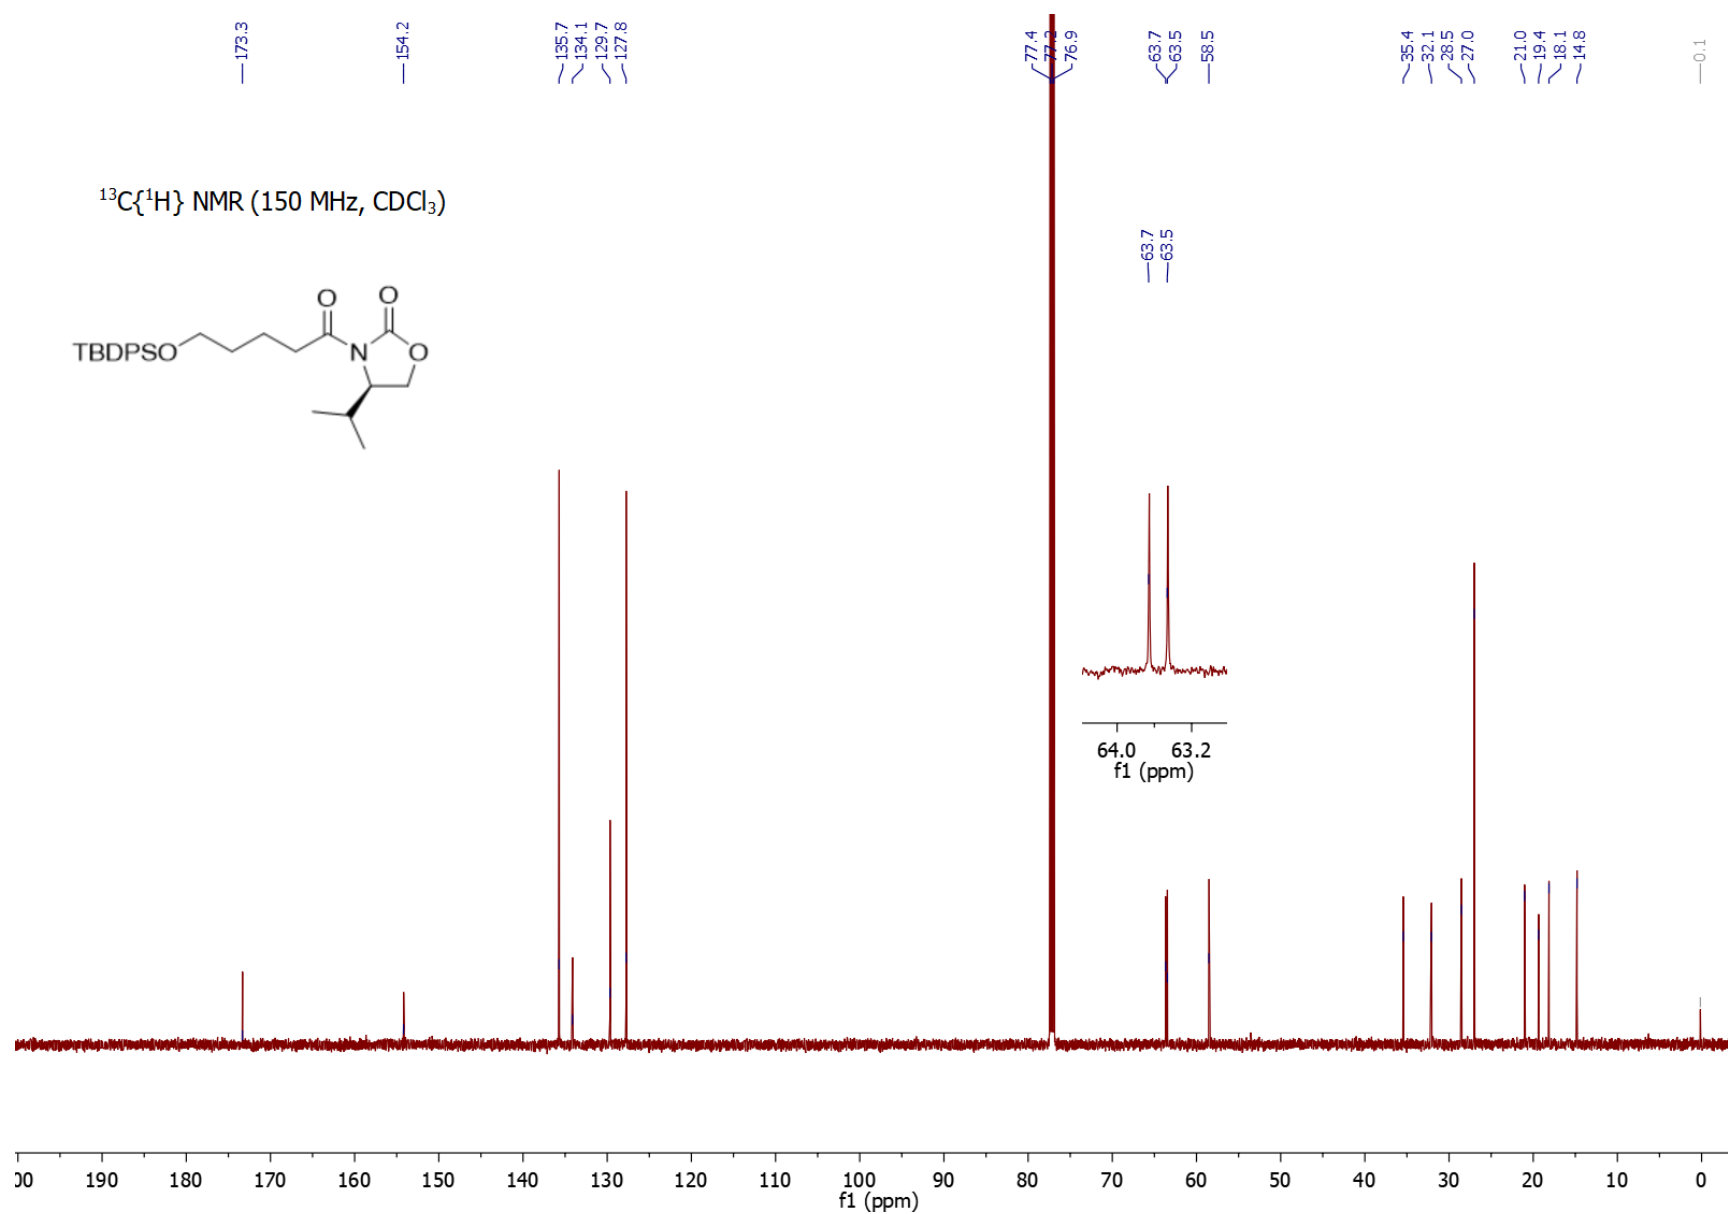



$^{13}\text{C}\{^1\text{H}\}$  NMR (150 MHz,  $\text{CDCl}_3$ )

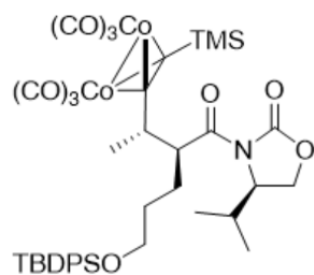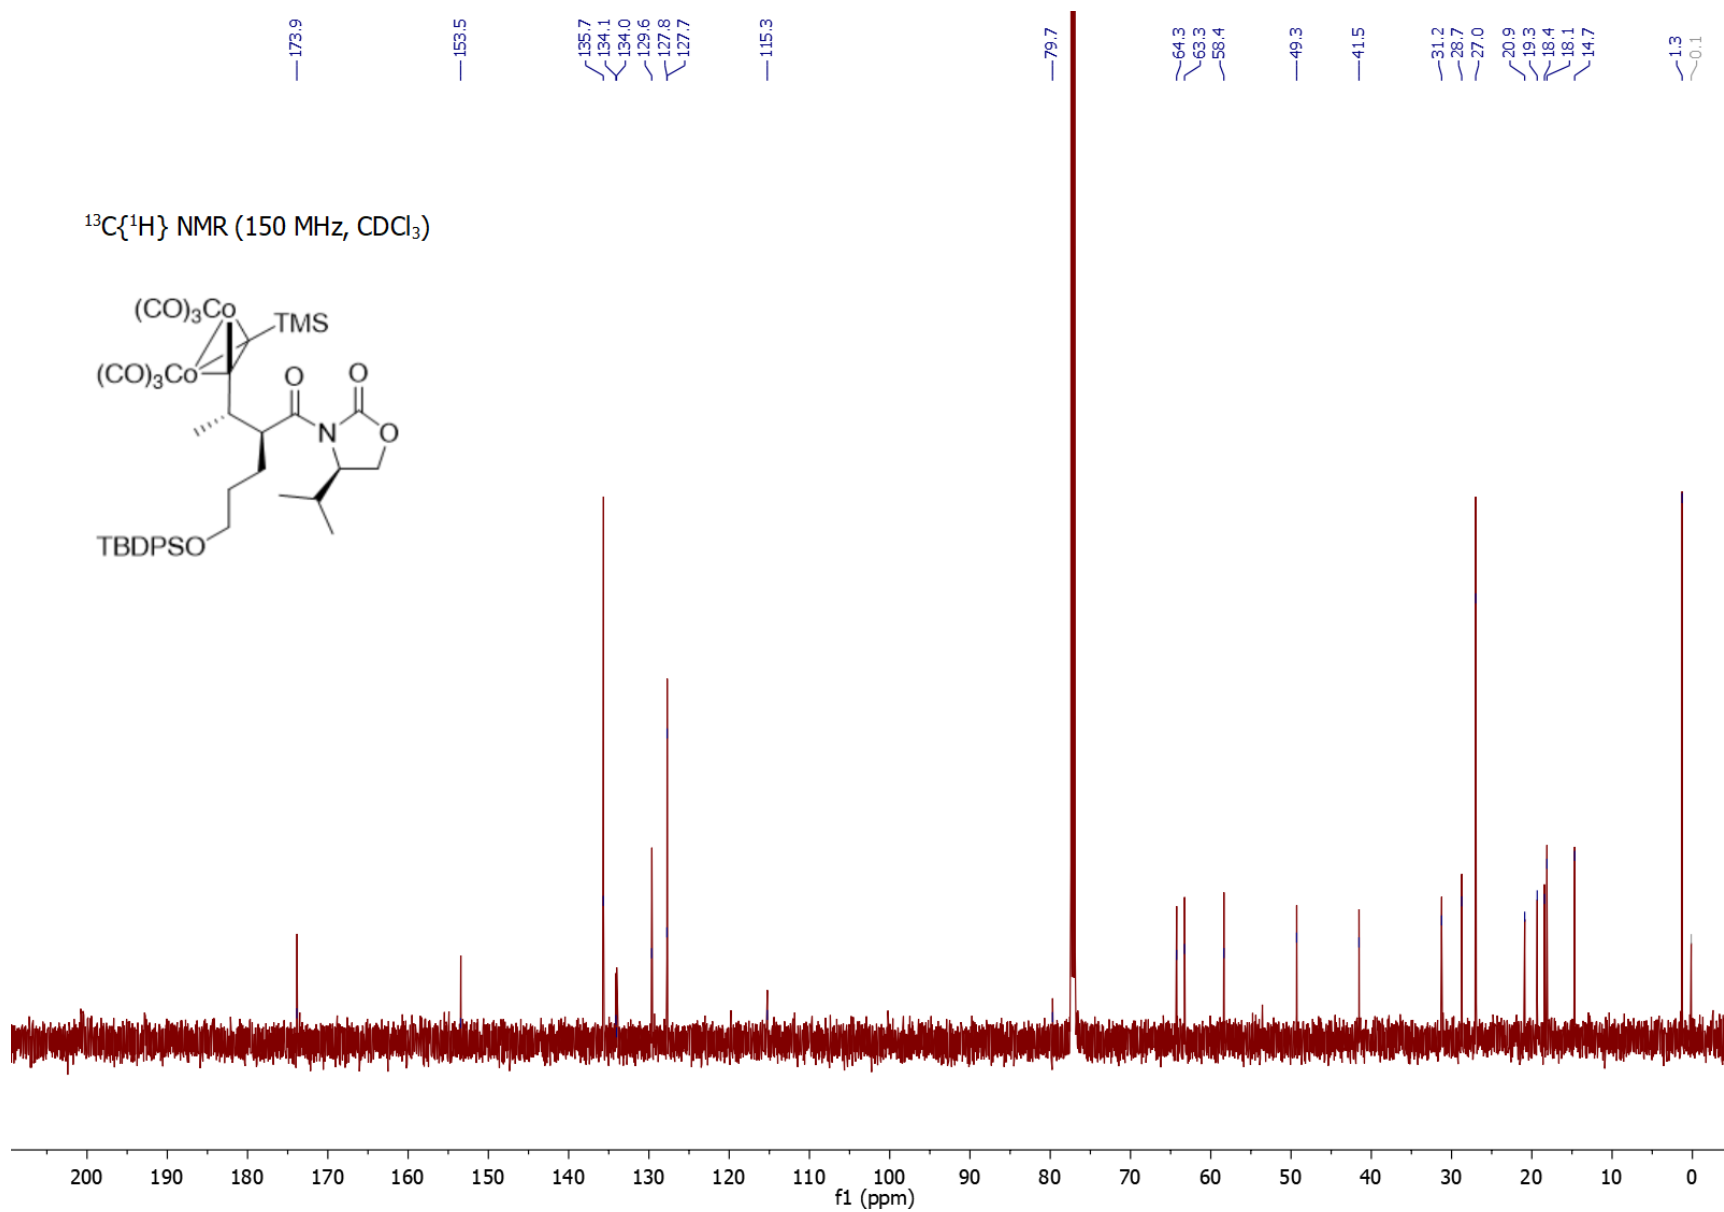



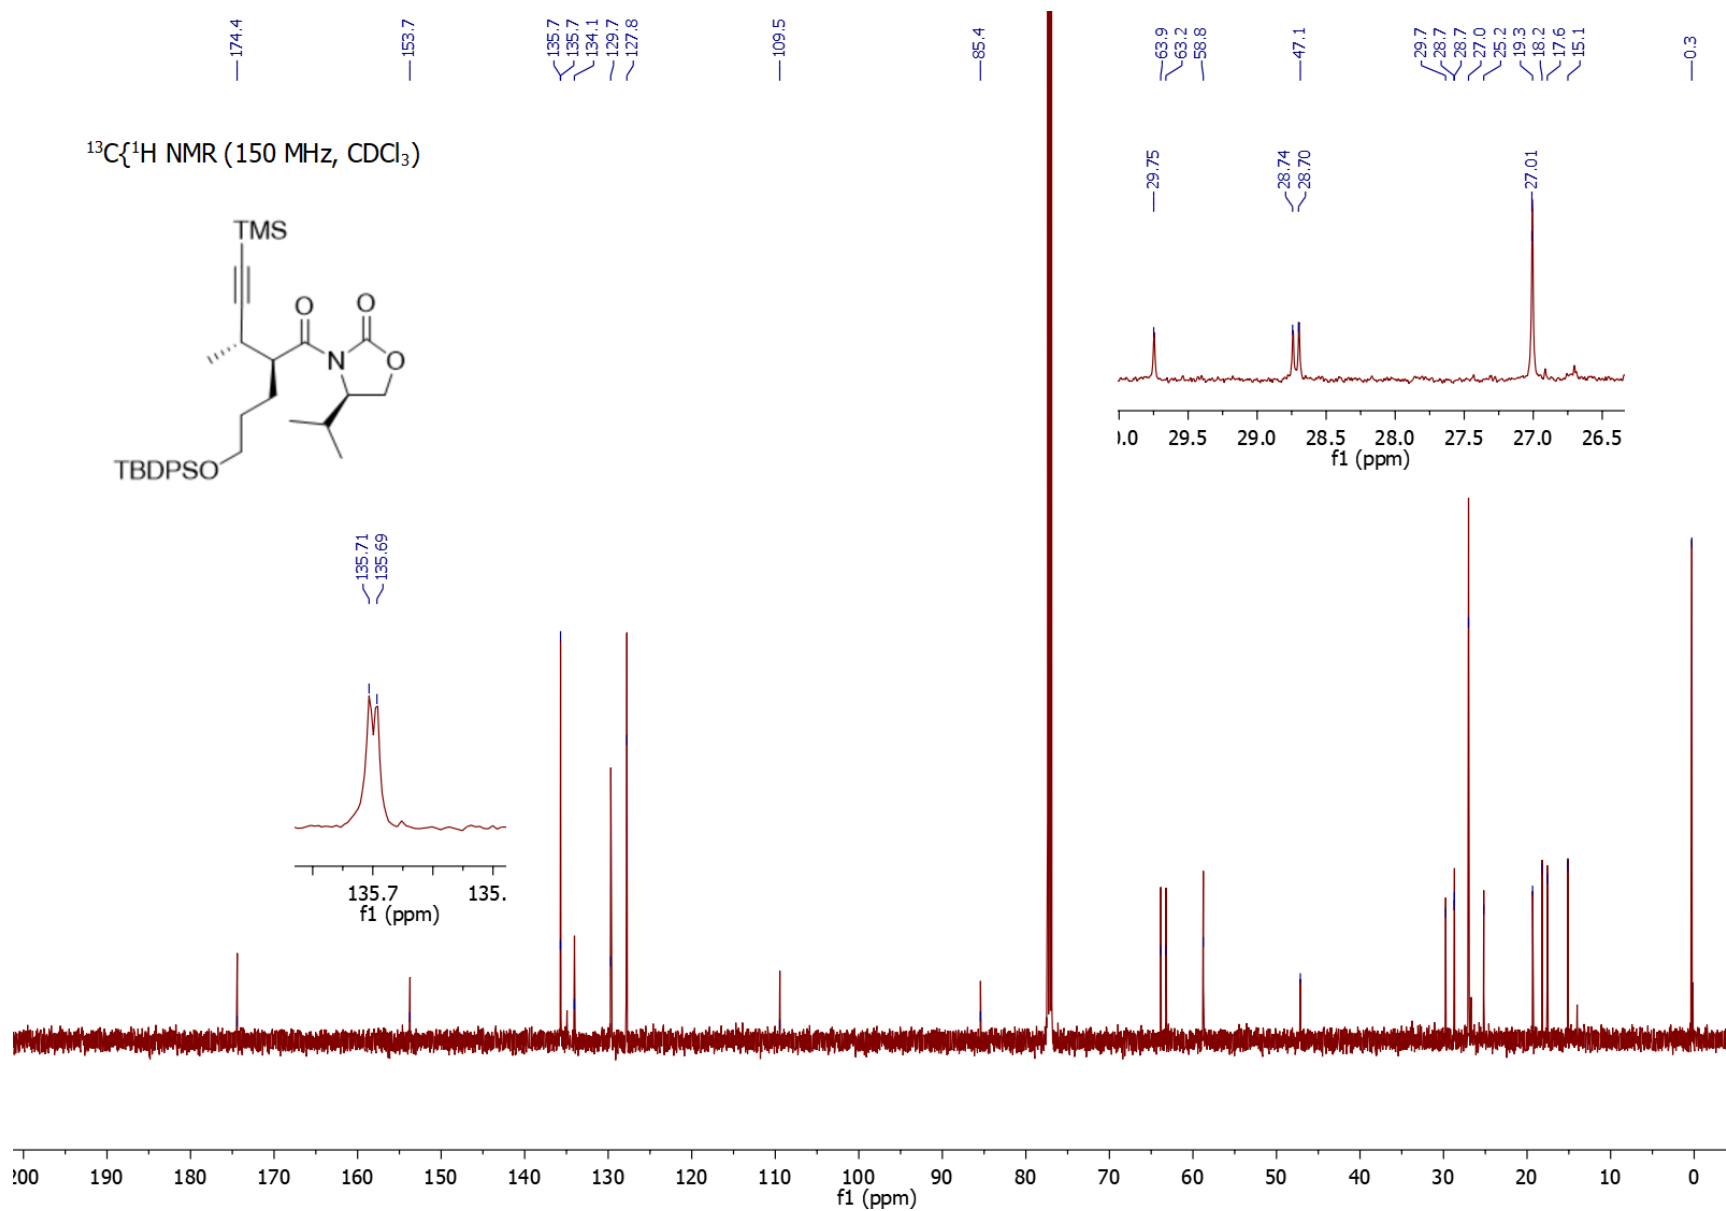







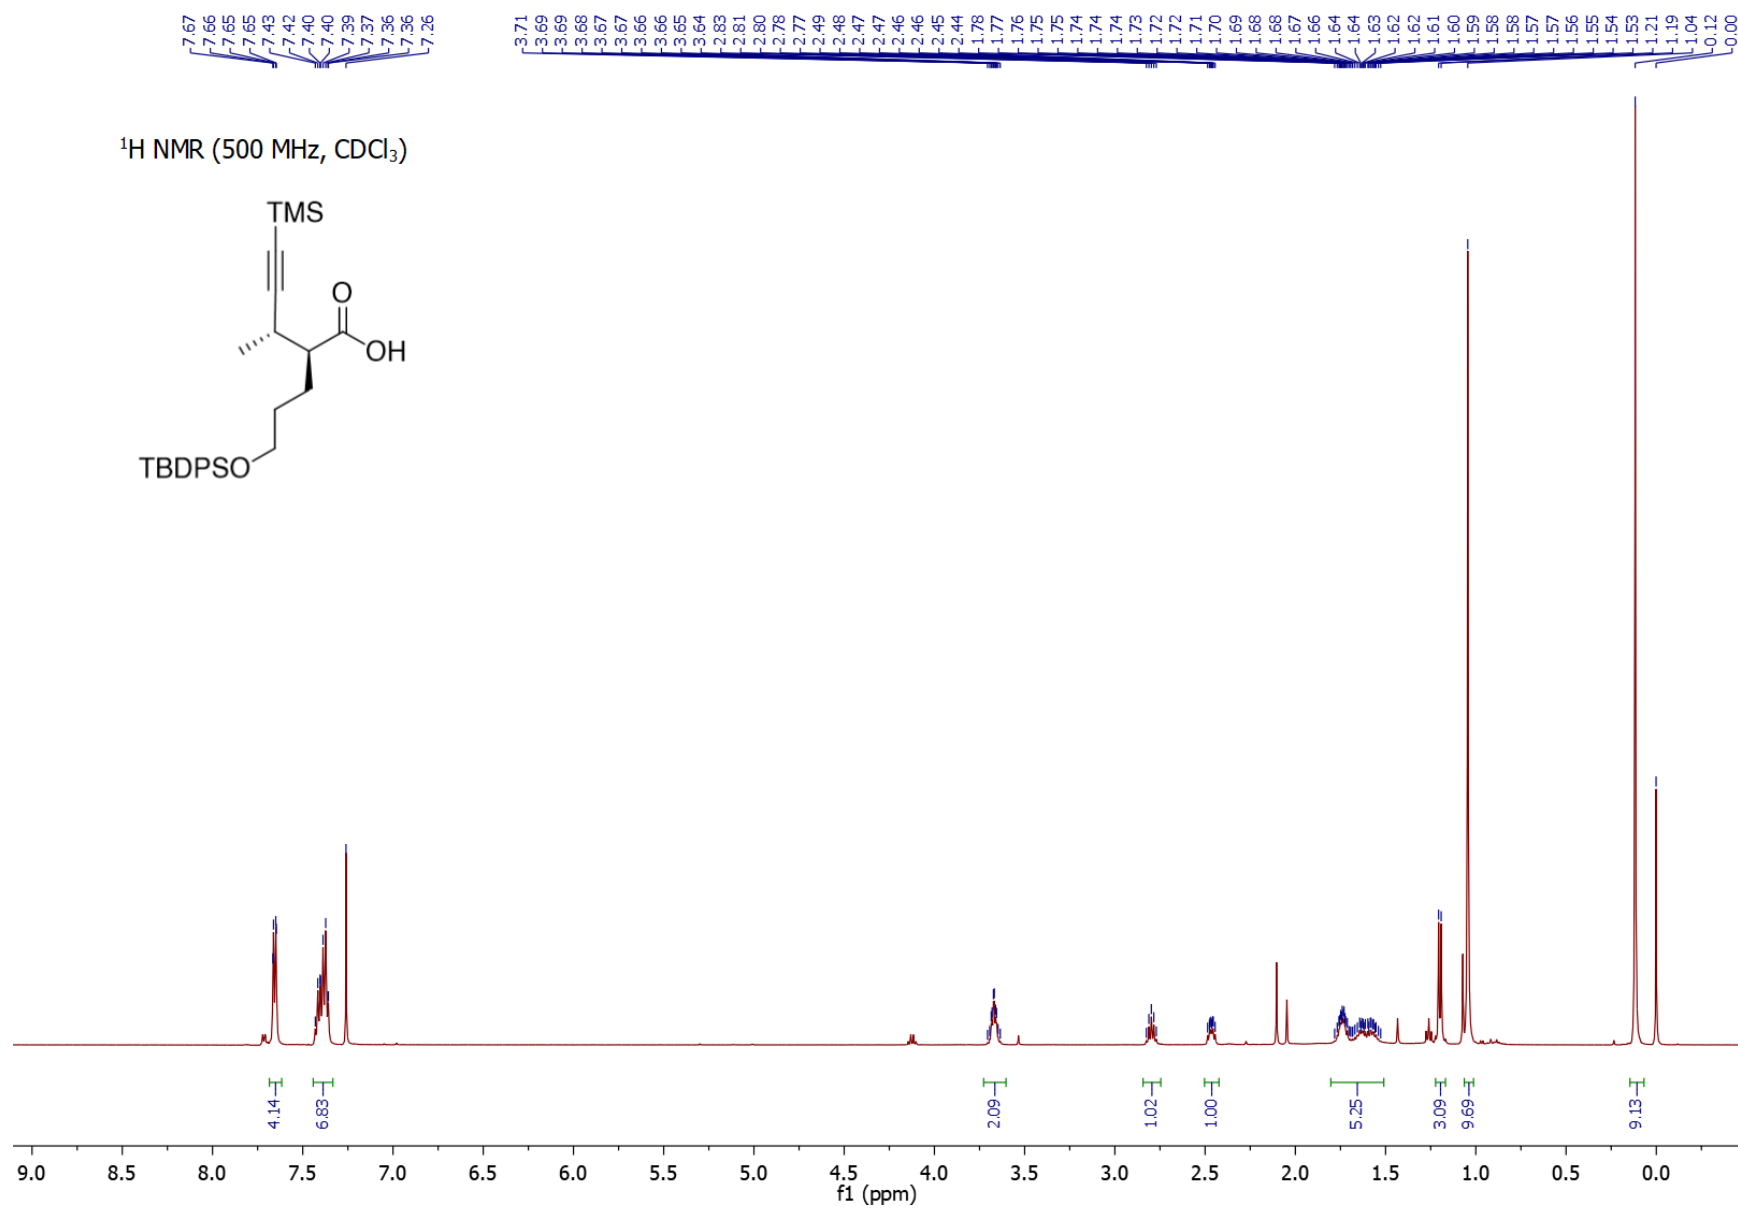

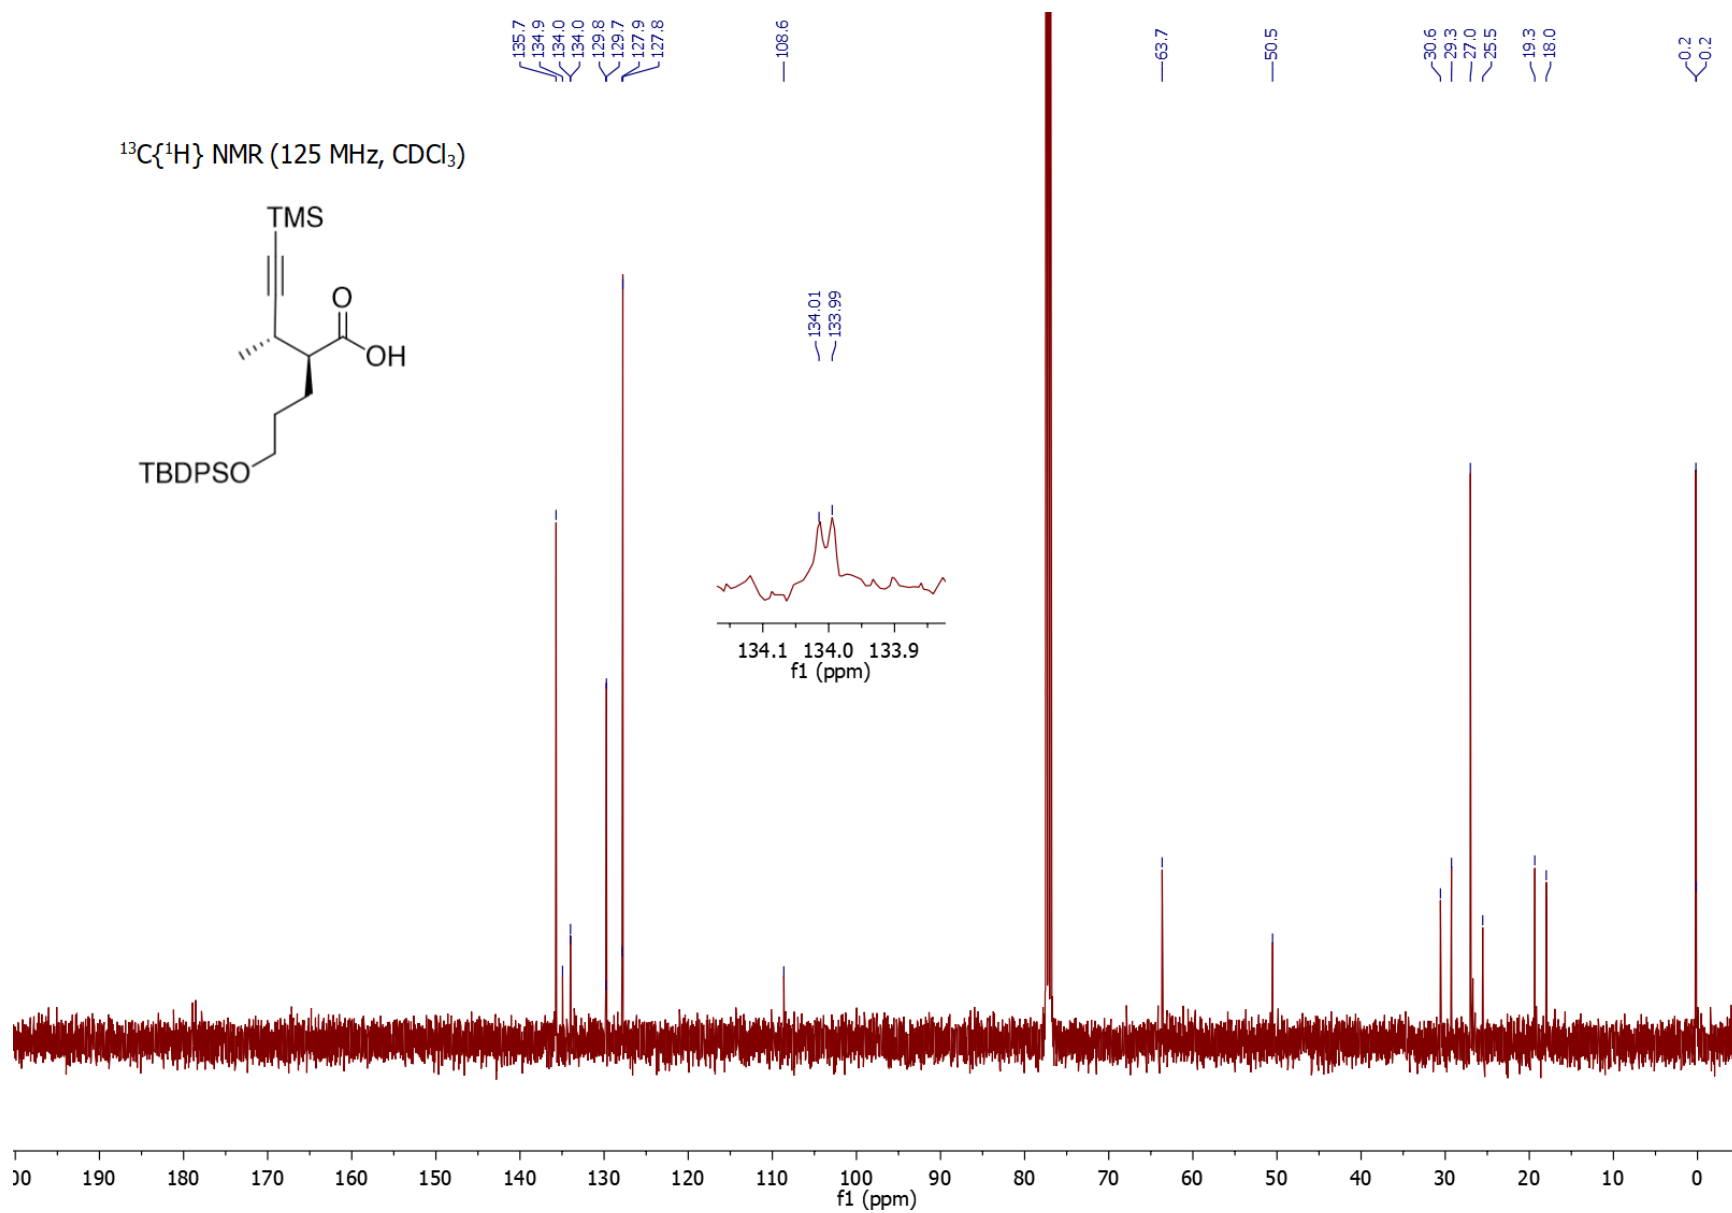



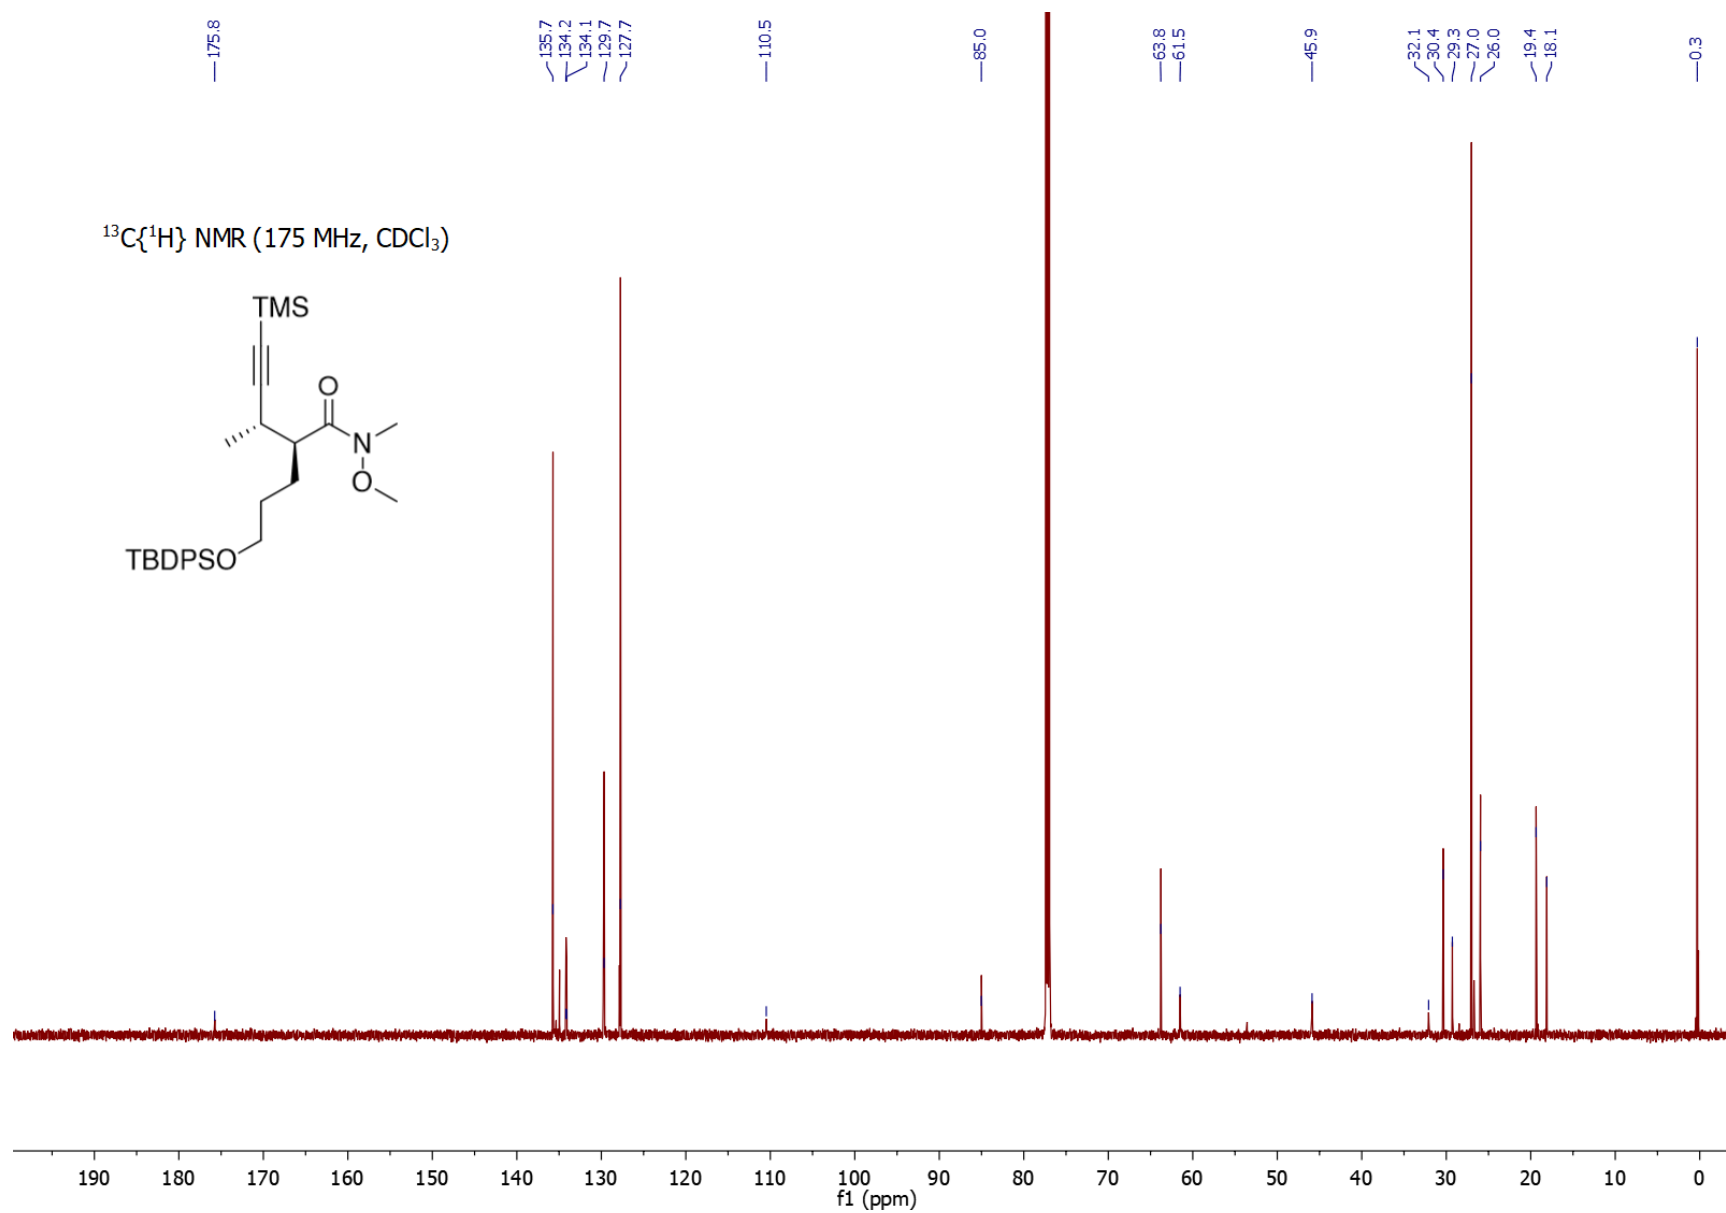

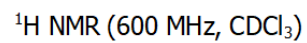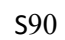

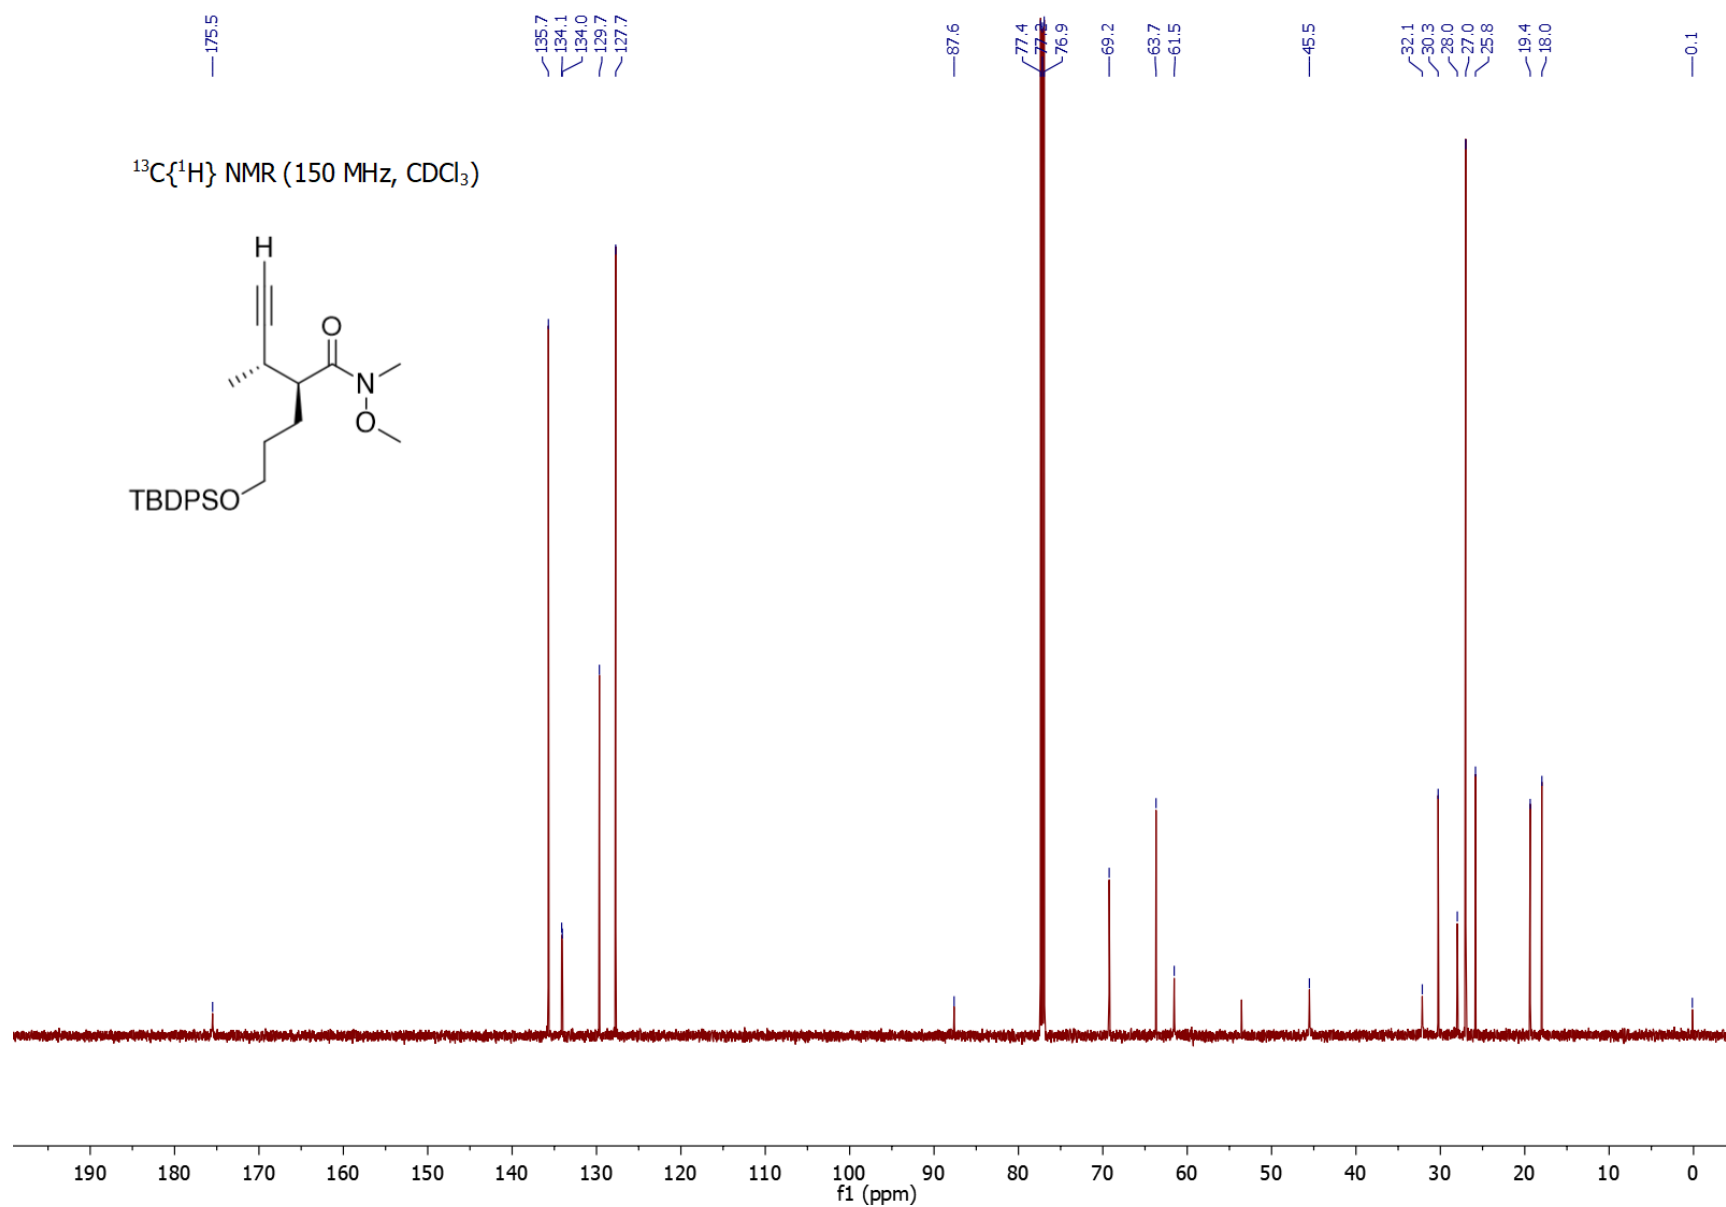





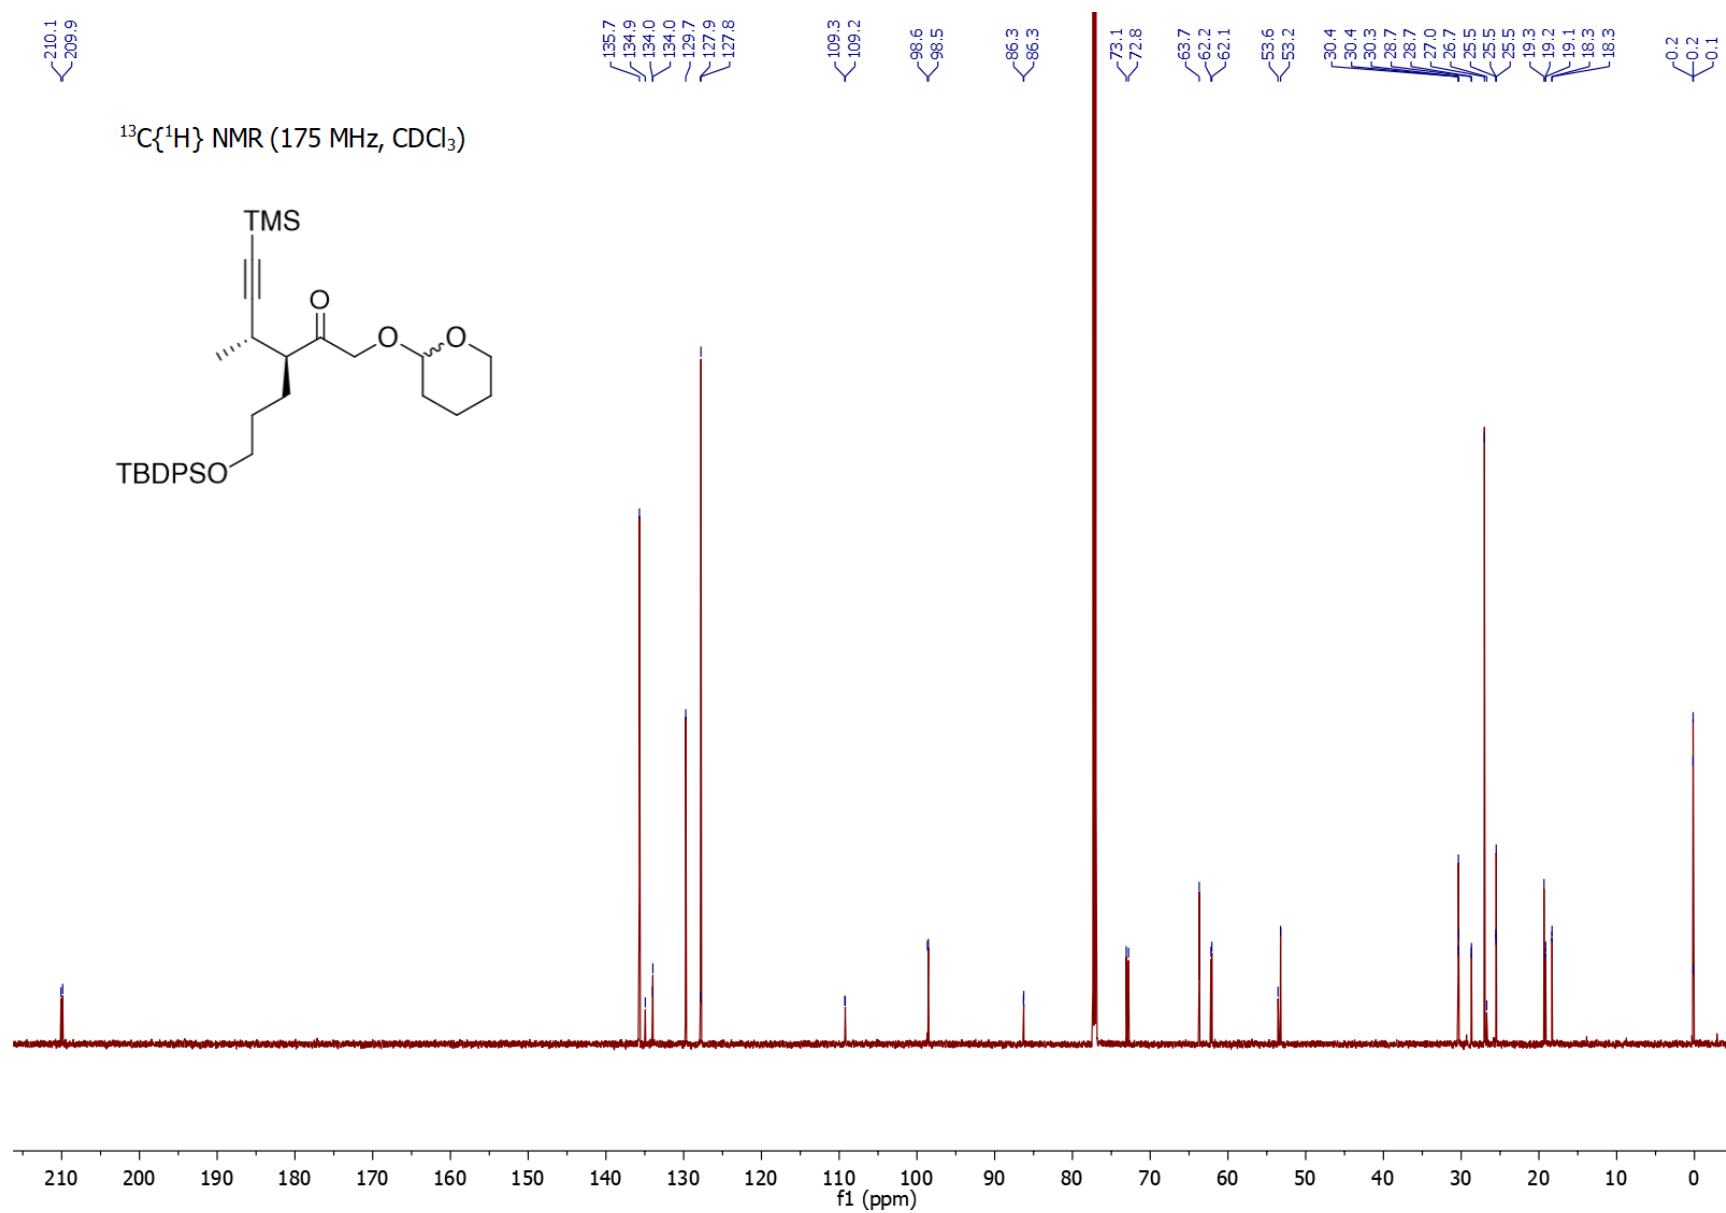





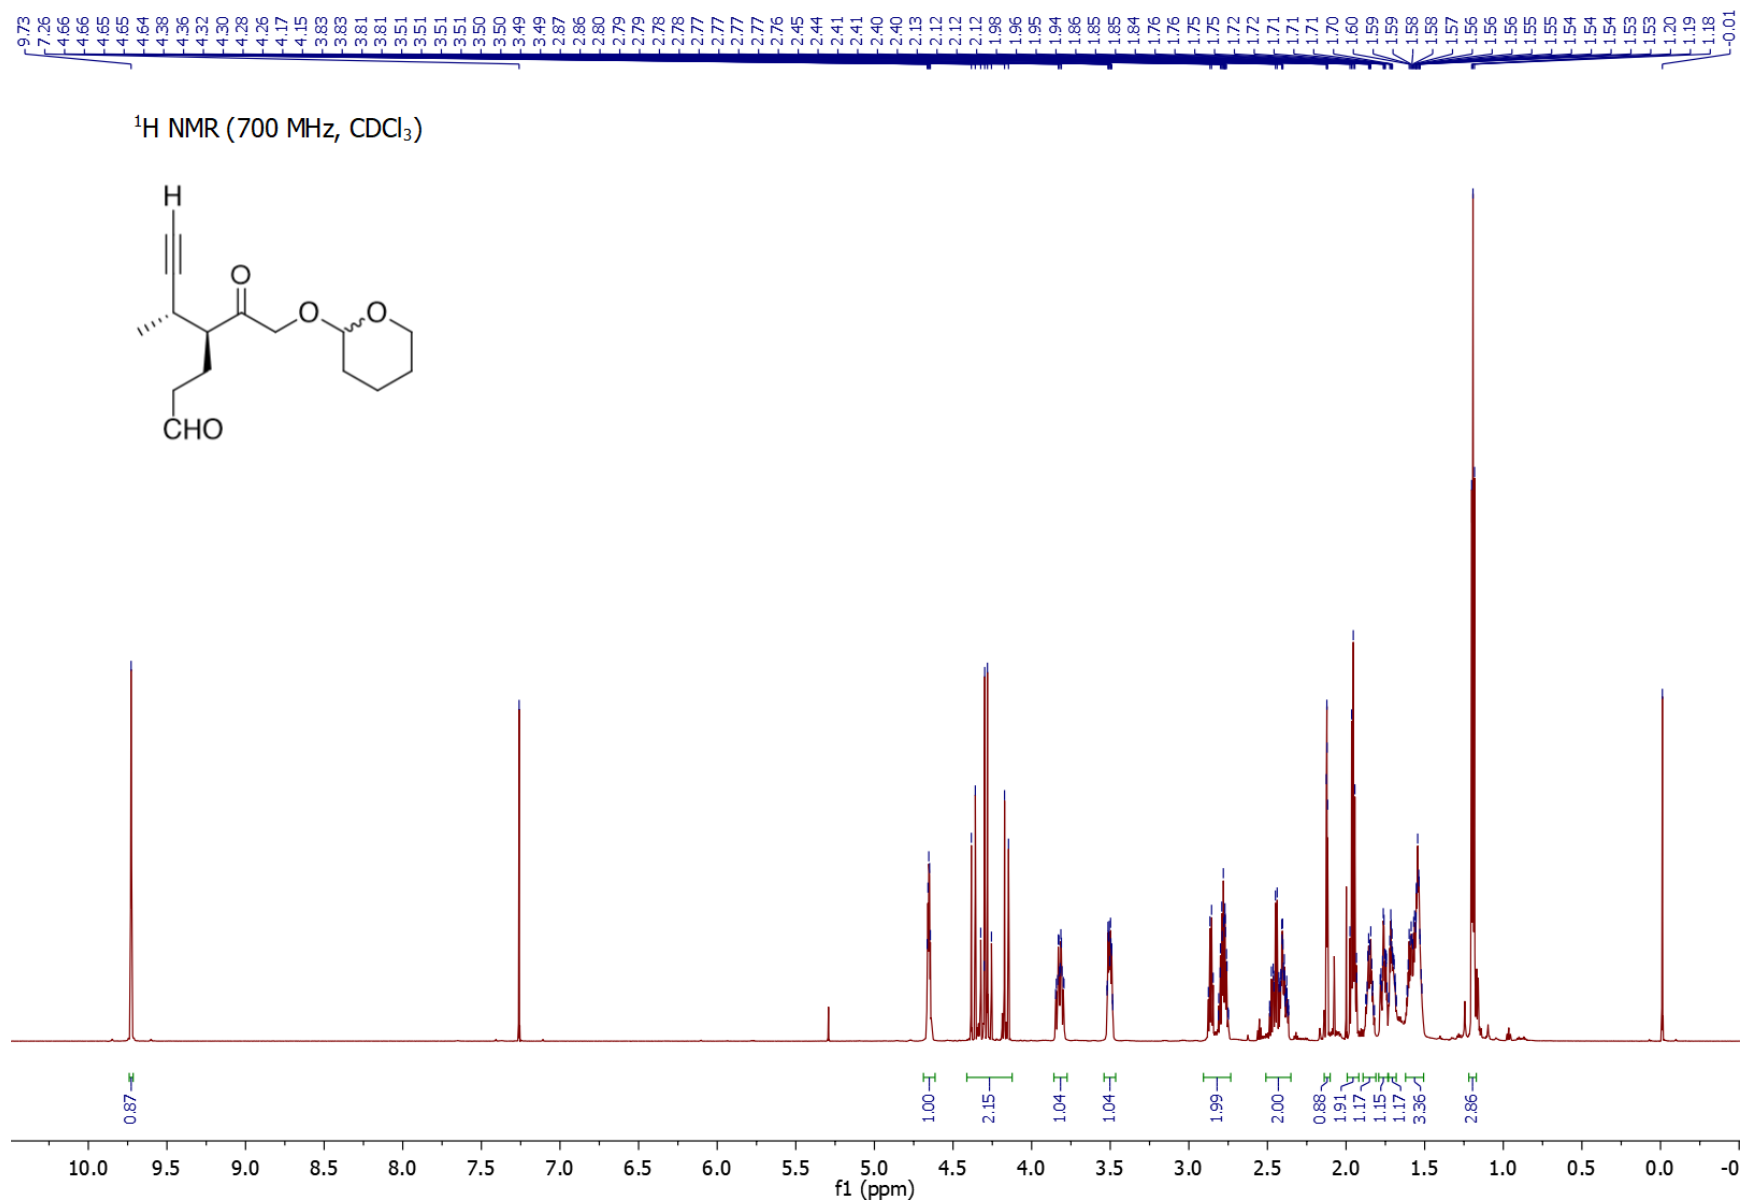

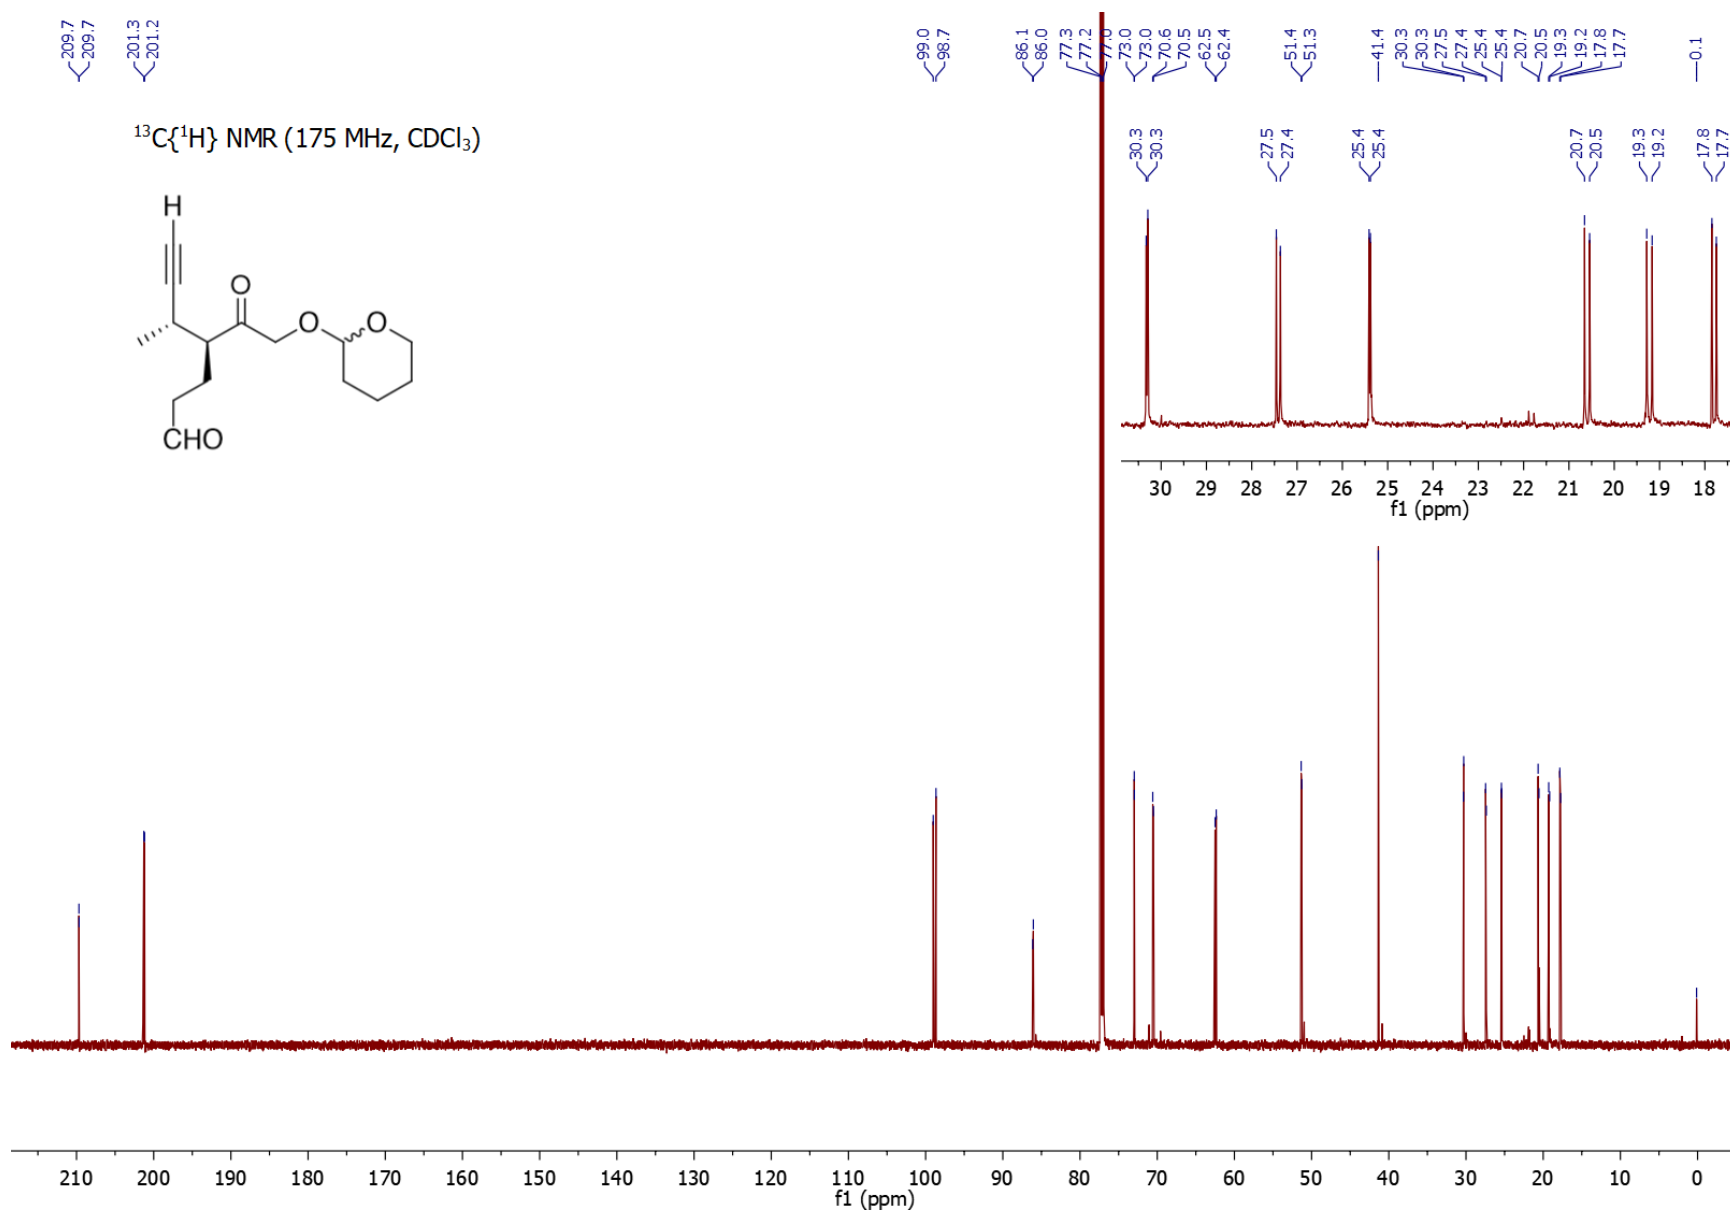

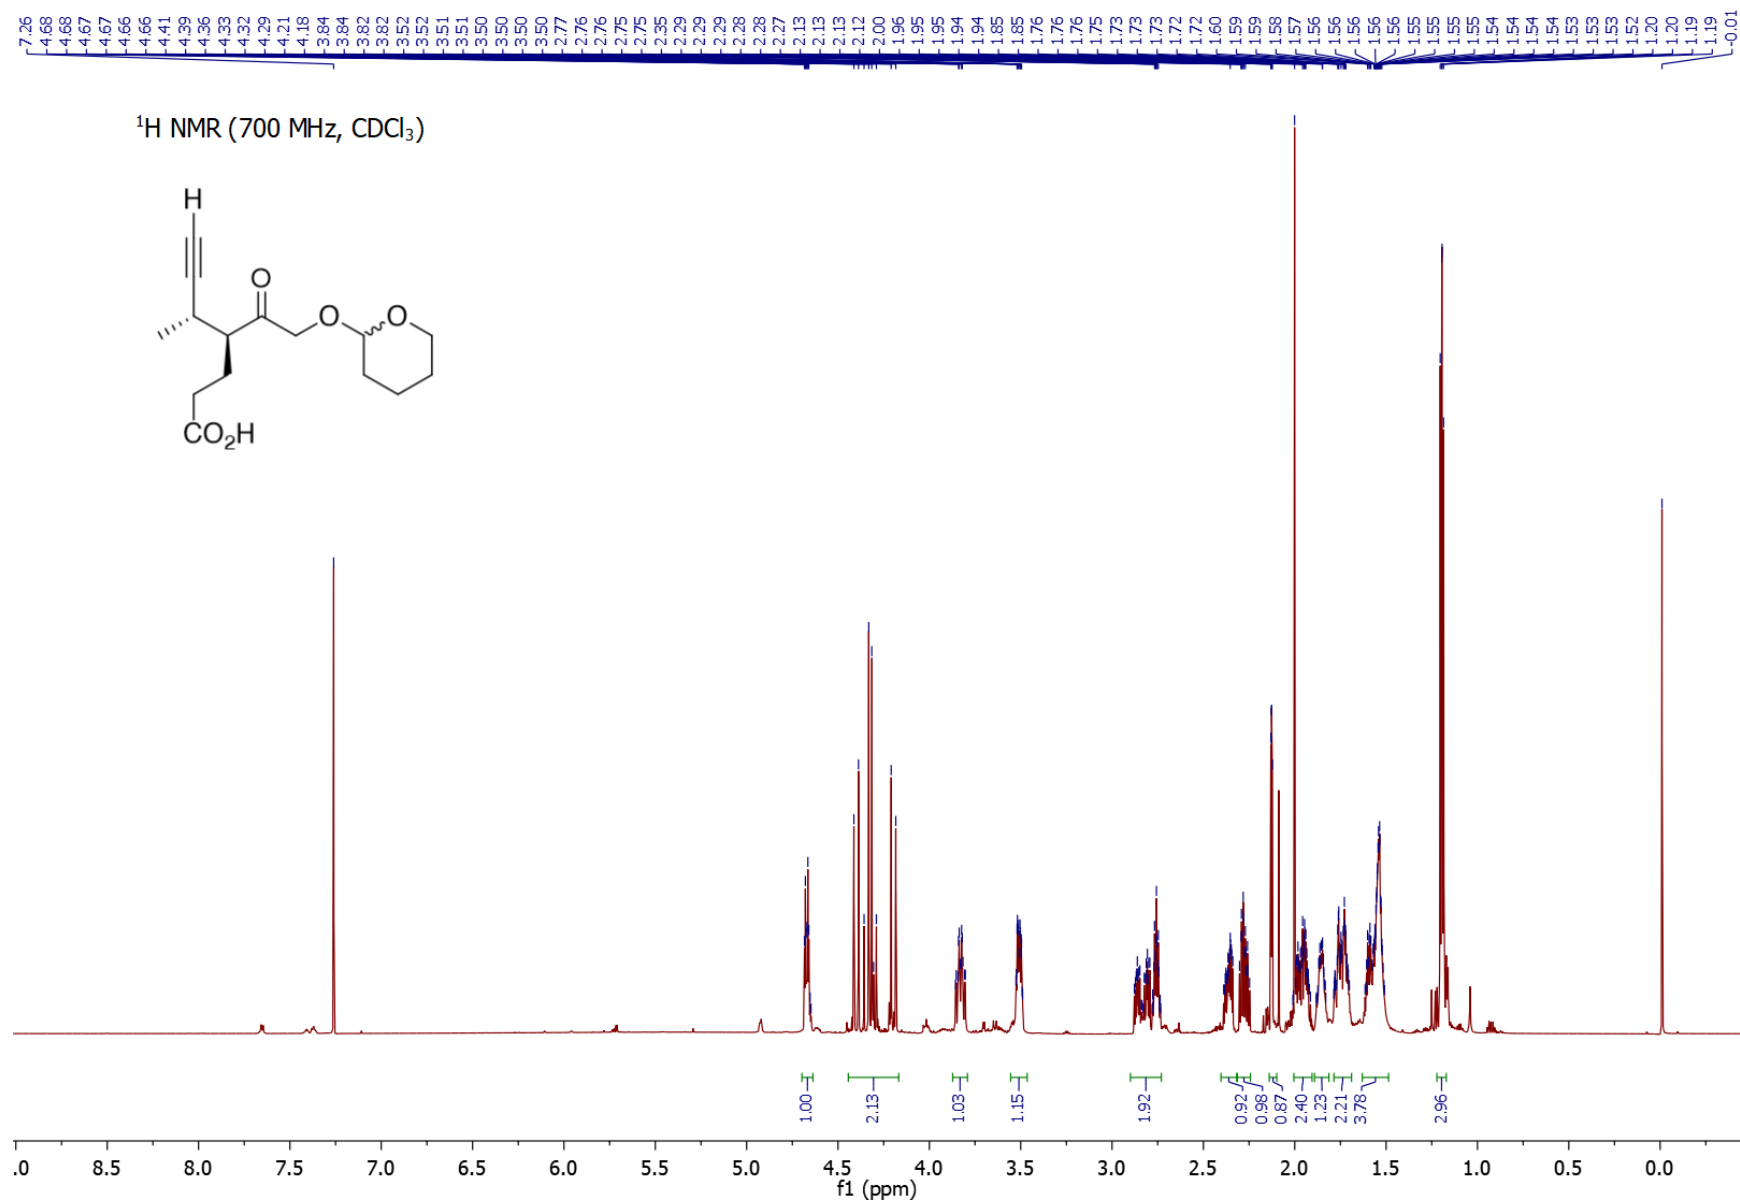

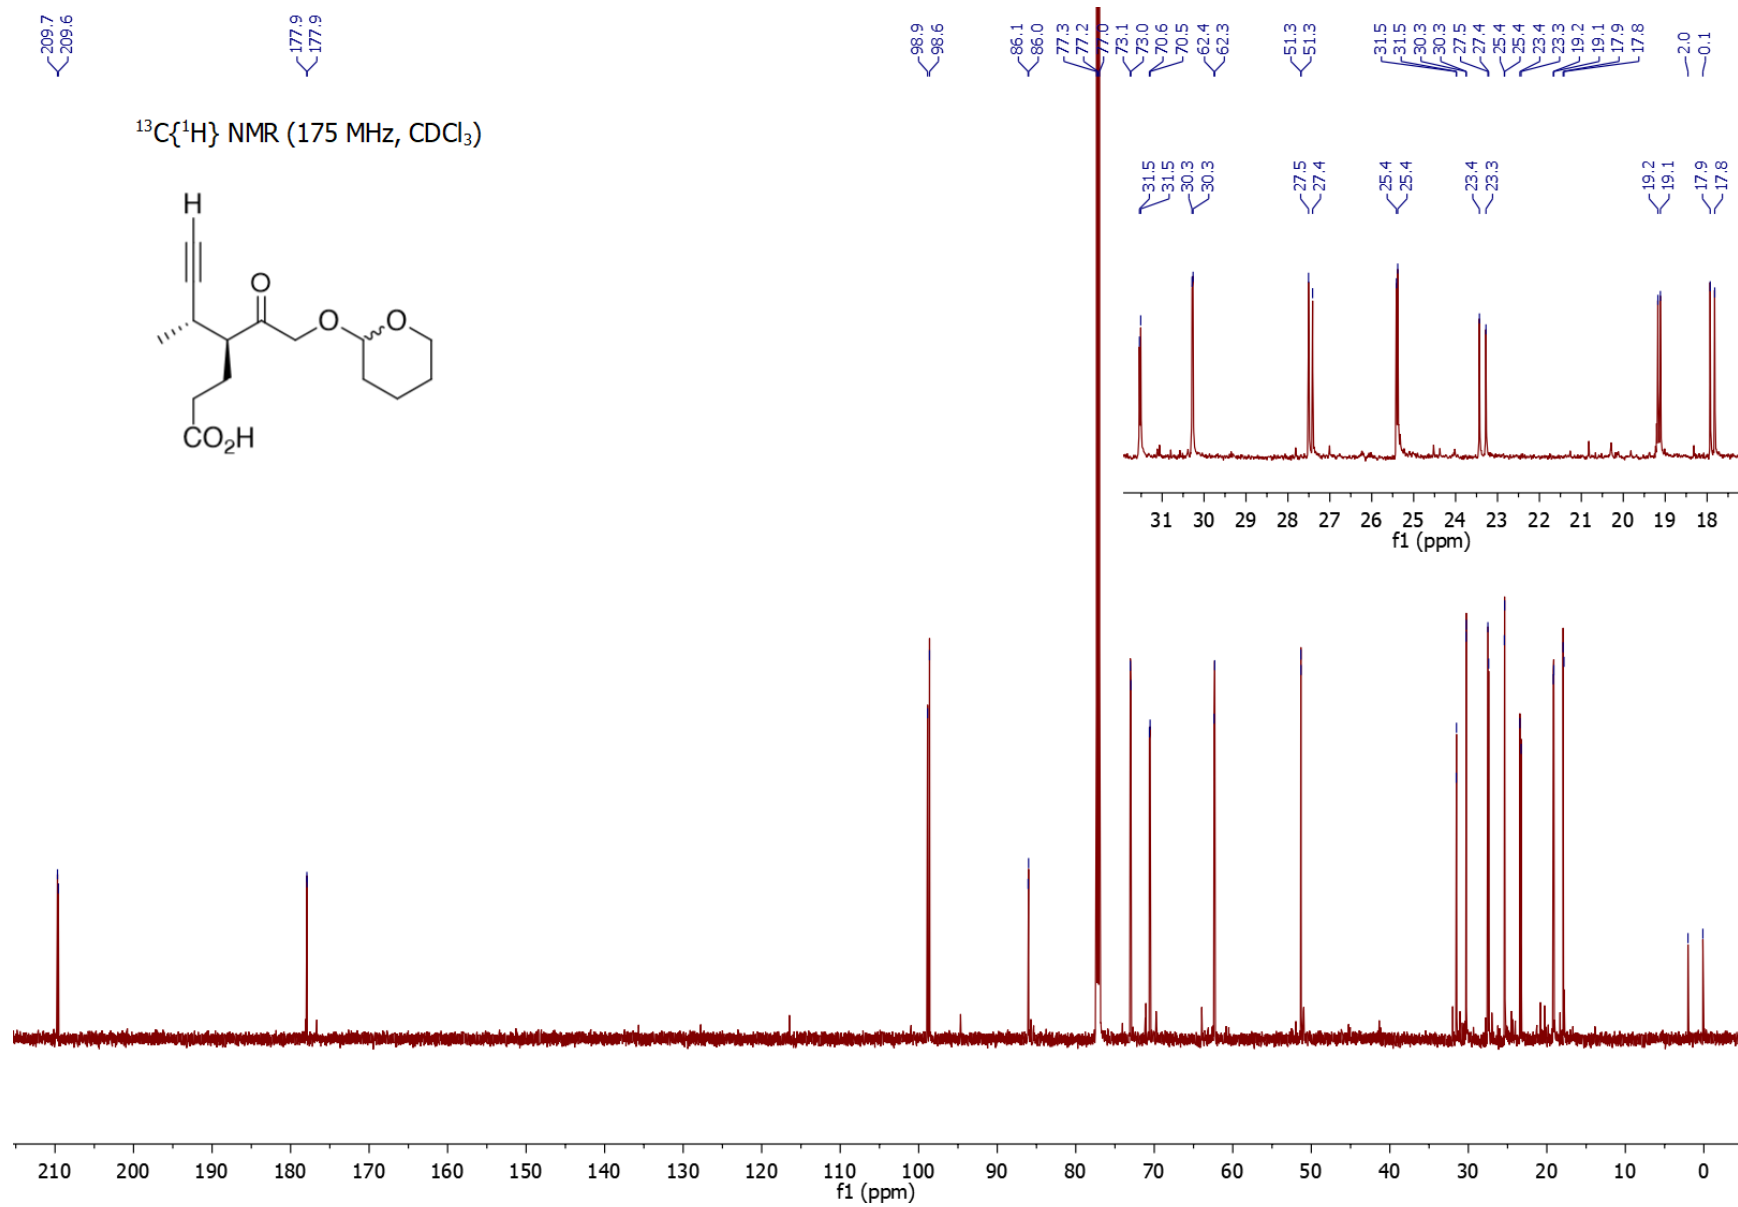

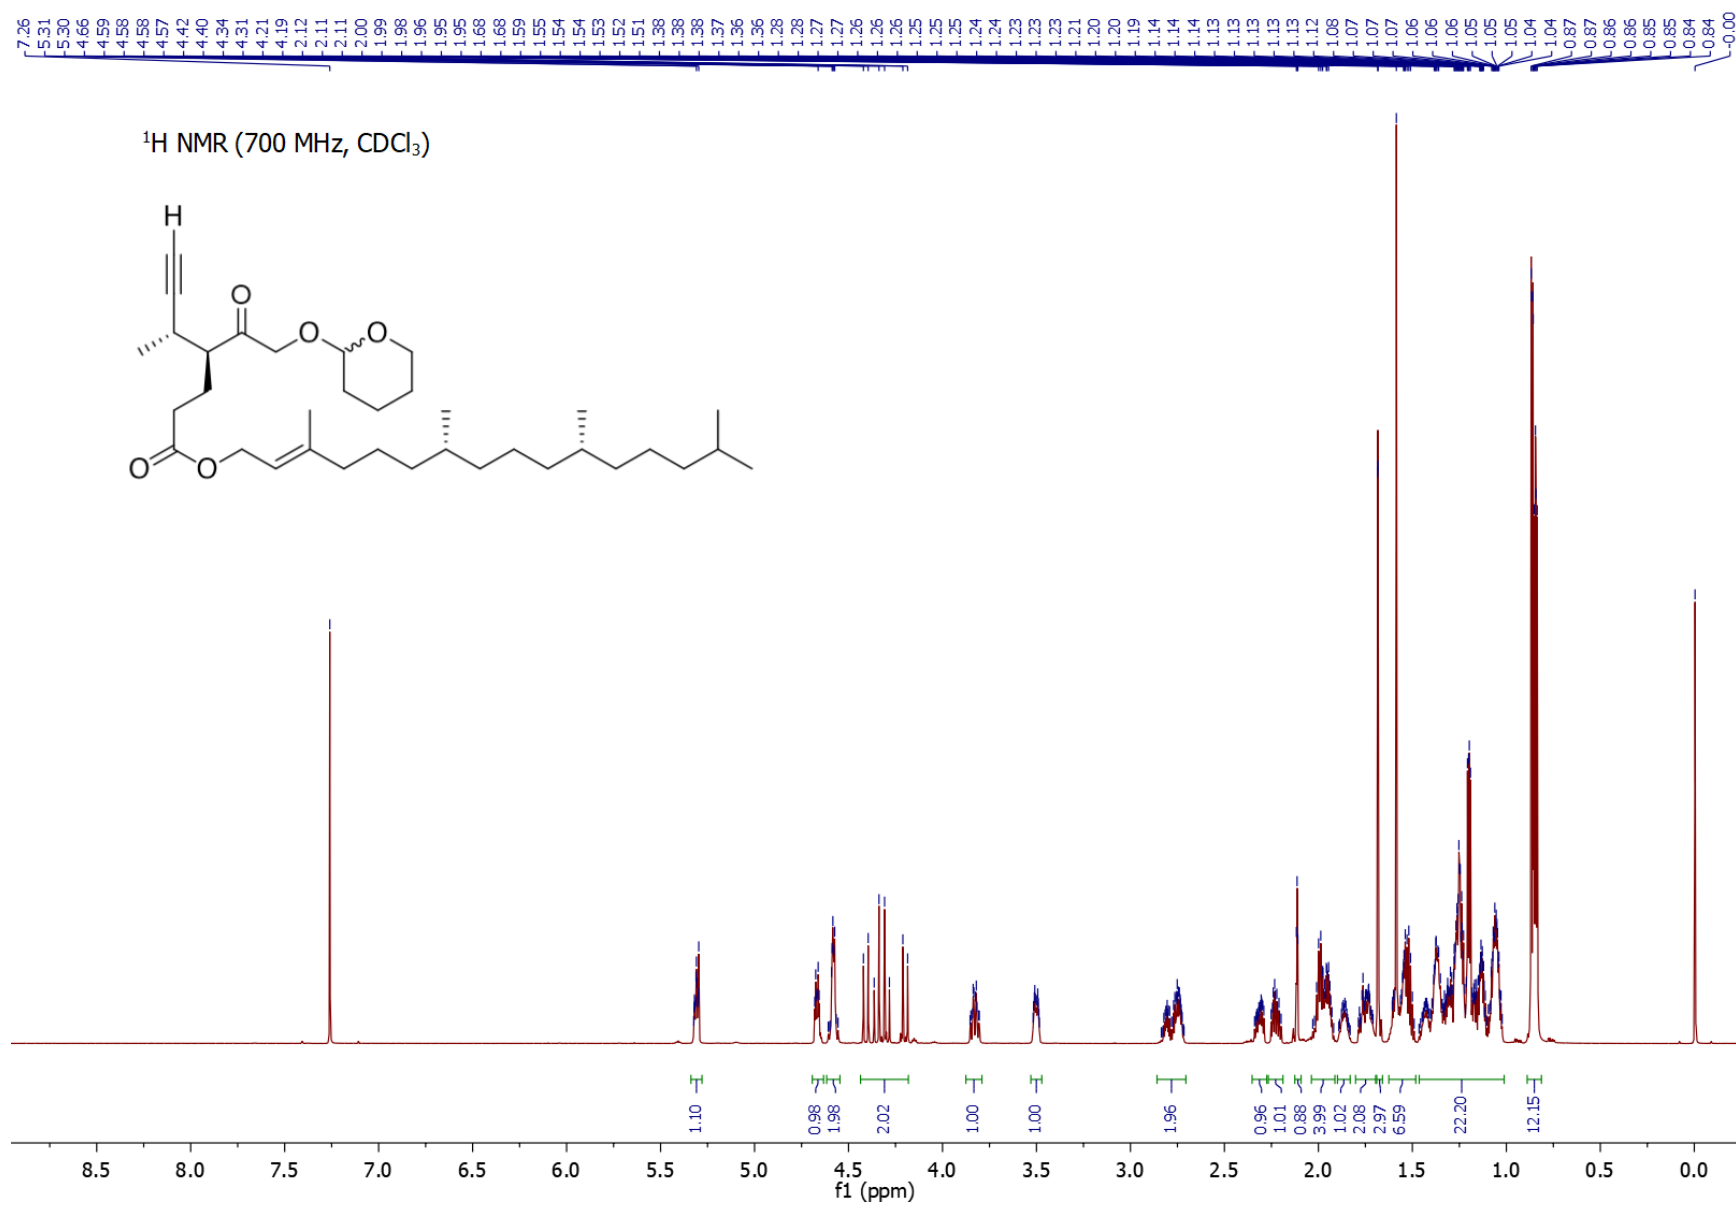



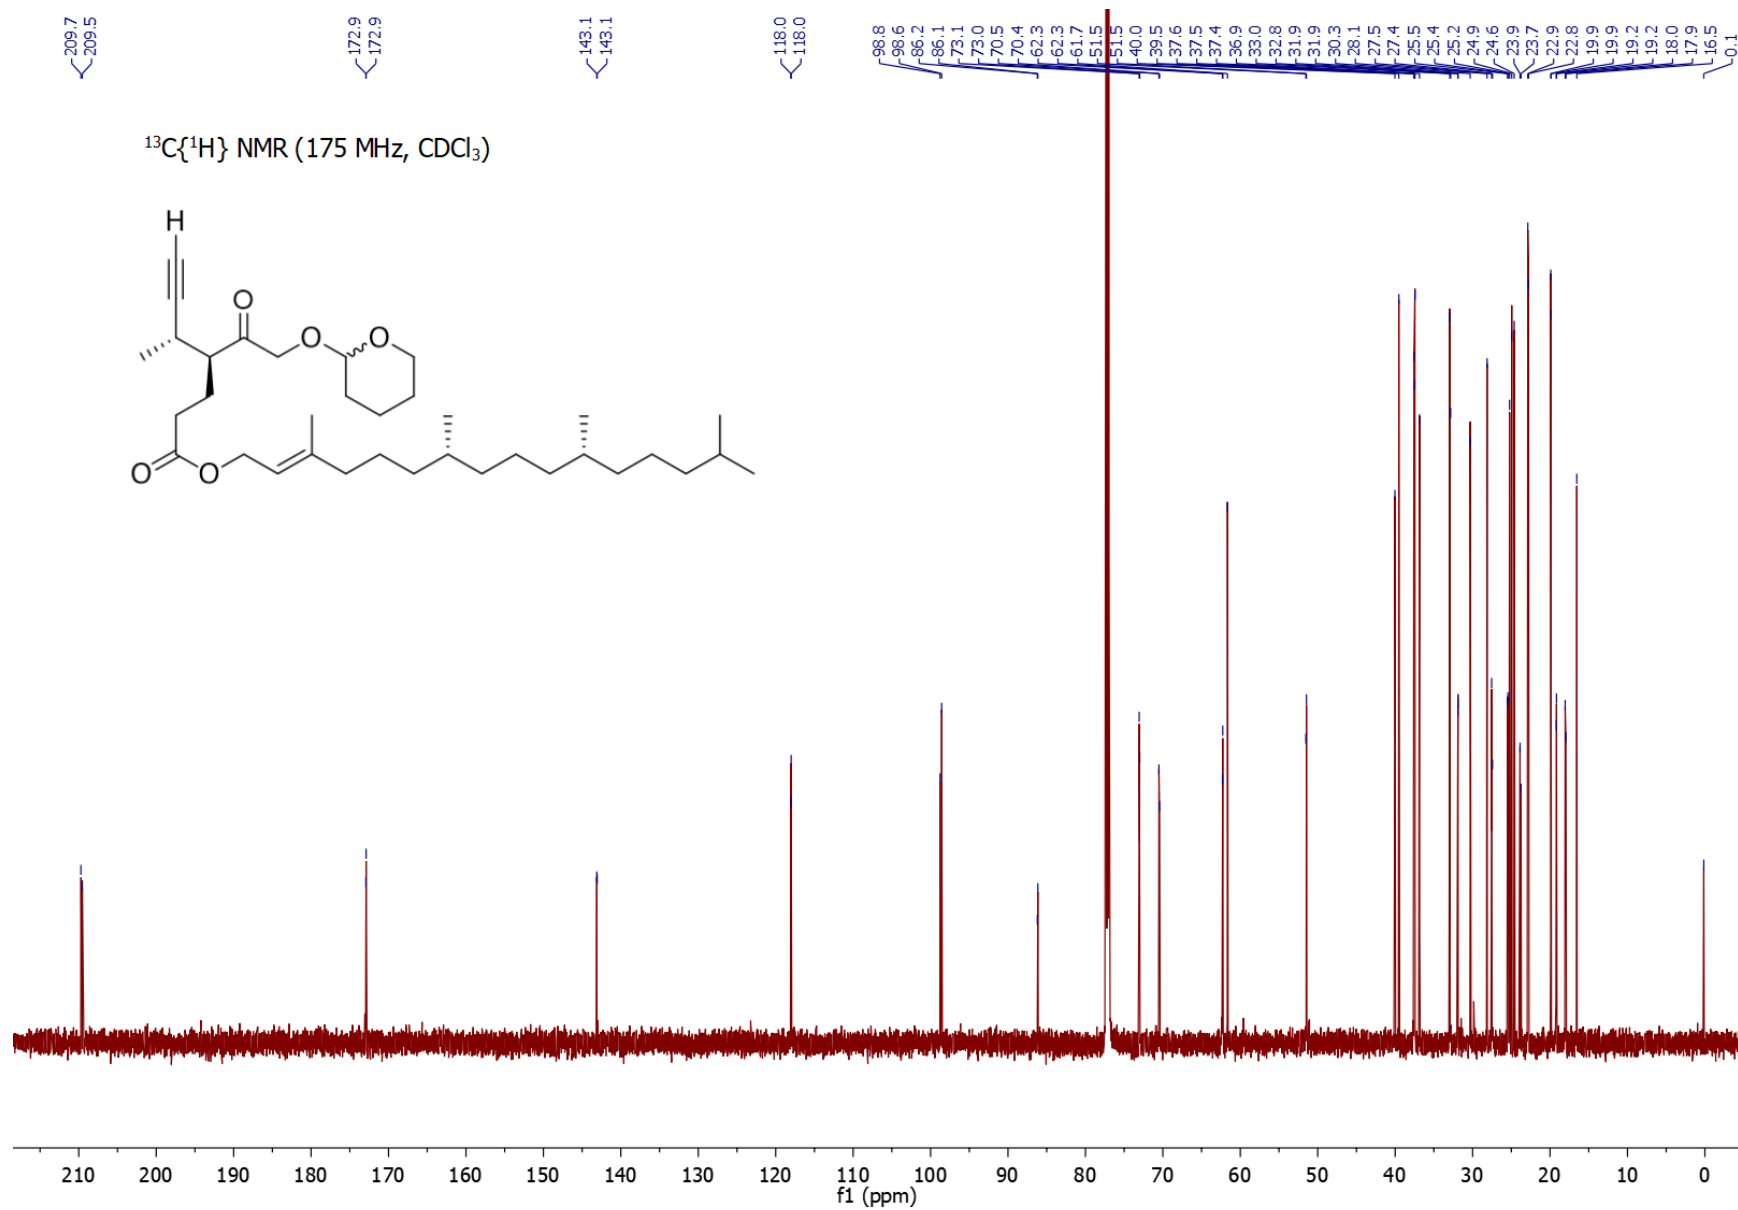

Supplement: d3nj03900e1.pdf [file d3nj03900e1.pdf]
